# Supplementary material for: Indications for a universal hydrogen catalysis mechanism in [FeFe]-hydrogenases of different phylogenetic groups
Source: Royal Society of Chemistry journal article supplement (doi:10.1039/d5cp00412h), 2025-01-01
Supplement: d5cp00412h1.xlsx [file d5cp00412h1.xlsx]

## Sheet: Fig2A top spectrum
X	data	fit	Hox	Hred'
1690.6	0.000516736	1.23829e-108	-1.49203e-200	1.25981e-108
1691.25	0.000474141	4.28118e-107	-5.49444e-198	4.35557e-107
1691.89	0.000426015	1.44194e-105	-1.94648e-195	1.467e-105
1692.53	0.000368196	4.73127e-104	-6.63369e-193	4.81348e-104
1693.18	0.000279	1.51234e-102	-2.1749e-190	1.53862e-102
1693.82	0.000123064	4.70942e-101	-6.85969e-188	4.79125e-101
1694.46	-0.000100918	1.42866e-99	-2.08137e-185	1.45348e-99
1695.1	-0.00031909	4.22215e-98	-6.07536e-183	4.29552e-98
1695.75	-0.00042397	1.21558e-96	-1.70598e-180	1.2367e-96
1696.39	-0.000378418	3.40939e-95	-4.60847e-178	3.46863e-95
1697.03	-0.000261773	9.31565e-94	-1.19762e-175	9.47752e-94
1697.67	-0.00020194	2.47967e-92	-2.99406e-173	2.52276e-92
1698.32	-0.000269949	6.43012e-91	-7.2008e-171	6.54185e-91
1698.96	-0.000430588	1.62438e-89	-1.66602e-168	1.65261e-89
1699.6	-0.000571483	3.99761e-88	-3.70817e-166	4.06708e-88
1700.25	-0.000585436	9.58424e-87	-7.93998e-164	9.75078e-87
1700.89	-0.000453566	2.23851e-85	-1.63553e-161	2.2774e-85
1701.53	-0.000256052	5.09335e-84	-3.24097e-159	5.18185e-84
1702.17	-9.53961e-05	1.129e-82	-6.17836e-157	1.14861e-82
1702.82	-1.56154e-05	2.43795e-81	-1.13305e-154	2.48031e-81
1703.46	4.00607e-06	5.12864e-80	-1.99897e-152	5.21775e-80
1704.1	1.87941e-06	1.05105e-78	-3.39267e-150	1.06931e-78
1704.75	9.60144e-07	2.0984e-77	-5.53933e-148	2.13486e-77
1705.39	1.07635e-05	4.08128e-76	-8.70065e-146	4.15219e-76
1706.03	3.71861e-05	7.73301e-75	-1.3147e-143	7.86738e-75
1706.67	8.17591e-05	1.4274e-73	-1.91108e-141	1.4522e-73
1707.32	0.000136202	2.56676e-72	-2.67247e-139	2.61136e-72
1707.96	0.000184876	4.49646e-71	-3.59521e-137	4.57459e-71
1708.6	0.000217572	7.6736e-70	-4.65282e-135	7.80693e-70
1709.25	0.000240214	1.27577e-68	-5.79279e-133	1.29794e-68
1709.89	0.000267208	2.06628e-67	-6.93807e-131	2.10218e-67
1710.53	0.0003034	3.26023e-66	-7.99409e-129	3.31688e-66
1711.17	0.000340483	5.01133e-65	-8.86092e-127	5.09841e-65
1711.82	0.000367204	7.50415e-64	-9.44861e-125	7.63454e-64
1712.46	0.000374571	1.0947e-62	-9.69252e-123	1.11372e-62
1713.1	0.000356898	1.55572e-61	-9.565e-121	1.58275e-61
1713.75	0.00031876	2.15383e-60	-9.08055e-119	2.19125e-60
1714.39	0.000272794	2.90493e-59	-8.29315e-117	2.9554e-59
1715.03	0.000218153	3.81684e-58	-7.28628e-115	3.88316e-58
1715.67	0.000133457	4.88558e-57	-6.15845e-113	4.97047e-57
1716.32	1.10627e-05	6.09217e-56	-5.00745e-111	6.19803e-56
1716.96	-0.000109753	7.40069e-55	-3.91689e-109	7.52929e-55
1717.6	-0.000168017	8.75824e-54	-2.94745e-107	8.91042e-54
1718.24	-0.000142585	1.00973e-52	-2.13368e-105	1.02727e-52
1718.89	-7.31266e-05	1.13406e-51	-1.48591e-103	1.15377e-51
1719.53	-1.8442e-05	1.24083e-50	-9.95487e-102	1.26239e-50
1720.17	-9.47117e-06	1.32262e-49	-6.4159e-100	1.3456e-49
1720.82	-4.24548e-05	1.3734e-48	-3.97795e-98	1.39727e-48
1721.46	-9.8895e-05	1.38933e-47	-2.37269e-96	1.41347e-47
1722.1	-0.00016035	1.36917e-46	-1.36145e-94	1.39296e-46
1722.74	-0.000212998	1.31448e-45	-7.5152e-93	1.33732e-45
1723.39	-0.000249892	1.2294e-44	-3.9908e-91	1.25076e-44
1724.03	-0.000271388	1.12015e-43	-2.03872e-89	1.13962e-43
1724.67	-0.000280184	9.94273e-43	-1.00193e-87	1.01155e-42
1725.32	-0.000277391	8.59761e-42	-4.7369e-86	8.747e-42
1725.96	-0.000263198	7.24259e-41	-2.15443e-84	7.36843e-41
1726.6	-0.000238934	5.94366e-40	-9.42645e-83	6.04693e-40
1727.24	-0.000207145	4.75179e-39	-3.96775e-81	4.83436e-39
1727.89	-0.000171687	3.70088e-38	-1.60664e-79	3.76519e-38
1728.53	-0.000136197	2.808e-37	-6.25857e-78	2.85679e-37
1729.17	-9.87889e-05	2.07555e-36	-2.34536e-76	2.11161e-36
1729.82	-5.27955e-05	1.49456e-35	-8.45518e-75	1.52053e-35
1730.46	-4.24722e-07	1.04842e-34	-2.93235e-73	1.06664e-34
1731.1	3.43085e-05	7.1648e-34	-9.78339e-72	7.2893e-34
1731.74	1.73781e-05	4.76997e-33	-3.14008e-70	4.85286e-33
1732.39	-6.00468e-05	3.09365e-32	-9.69556e-69	3.14741e-32
1733.03	-0.000156642	1.95466e-31	-2.87994e-67	1.98862e-31
1733.67	-0.000199276	1.20314e-30	-8.22953e-66	1.22404e-30
1734.32	-0.000138557	7.21444e-30	-2.26227e-64	7.3398e-30
1734.96	7.99246e-06	4.21439e-29	-5.98266e-63	4.28761e-29
1735.6	0.000171726	2.39834e-28	-1.52203e-61	2.44001e-28
1736.24	0.000290715	1.32963e-27	-3.72505e-60	1.35273e-27
1736.89	0.000345789	7.18113e-27	-8.7704e-59	7.30591e-27
1737.53	0.00034825	3.77834e-26	-1.98649e-57	3.84399e-26
1738.17	0.000315141	1.93665e-25	-4.32846e-56	1.9703e-25
1738.82	0.000268533	9.67047e-25	-9.07319e-55	9.8385e-25
1739.46	0.000239521	4.70421e-24	-1.82964e-53	4.78595e-24
1740.1	0.000248647	2.22931e-23	-3.54936e-52	2.26804e-23
1740.74	0.000283369	1.0292e-22	-6.62392e-51	1.04708e-22
1741.39	0.000309522	4.62881e-22	-1.18921e-49	4.70924e-22
1742.03	0.000307088	2.02808e-21	-2.05392e-48	2.06332e-21
1742.67	0.000284914	8.65653e-21	-3.4126e-47	8.80694e-21
1743.31	0.000262492	3.59954e-20	-5.45466e-46	3.66208e-20
1743.96	0.000247215	1.45812e-19	-8.38745e-45	1.48346e-19
1744.6	0.000232581	5.75421e-19	-1.24071e-43	5.85419e-19
1745.24	0.000209963	2.21218e-18	-1.7656e-42	2.25062e-18
1745.89	0.000176308	8.28514e-18	-2.41709e-41	8.4291e-18
1746.53	0.000133479	3.0229e-17	-3.18326e-40	3.07542e-17
1747.17	8.6871e-05	1.07446e-16	-4.03302e-39	1.09313e-16
1747.81	4.42039e-05	3.7205e-16	-4.91552e-38	3.78515e-16
1748.46	7.30735e-06	1.25504e-15	-5.76351e-37	1.27684e-15
1749.1	-3.47957e-05	4.12435e-15	-6.50107e-36	4.19601e-15
1749.74	-9.46357e-05	1.32038e-14	-7.05443e-35	1.34332e-14
1750.39	-0.000161713	4.11799e-14	-7.36407e-34	4.18955e-14
1751.03	-0.000200975	1.25117e-13	-7.39527e-33	1.27291e-13
1751.67	-0.000187913	3.70332e-13	-7.14446e-32	3.76767e-13
1752.31	-0.000138355	1.06785e-12	-6.63994e-31	1.08641e-12
1752.96	-9.16704e-05	2.99967e-12	-5.9366e-30	3.05179e-12
1753.6	-7.16198e-05	8.20882e-12	-5.10613e-29	8.35145e-12
1754.24	-7.70676e-05	2.18842e-11	-4.22498e-28	2.22645e-11
1754.89	-0.000100117	5.68364e-11	-3.36308e-27	5.78239e-11
1755.53	-0.000133581	1.43802e-10	-2.57531e-26	1.46301e-10
1756.17	-0.000163376	3.54444e-10	-1.89715e-25	3.60603e-10
1756.81	-0.000173072	8.51088e-10	-1.34447e-24	8.65877e-10
1757.46	-0.000160151	1.99088e-09	-9.16605e-24	2.02547e-09
1758.1	-0.00013784	4.53691e-09	-6.01162e-23	4.61574e-09
1758.74	-0.000121922	1.00721e-08	-3.79298e-22	1.02471e-08
1759.39	-0.000123034	2.17832e-08	-2.30224e-21	2.21617e-08
1760.03	-0.00014524	4.58953e-08	-1.34431e-20	4.66928e-08
1760.67	-0.000178899	9.42017e-08	-7.55137e-20	9.58386e-08
1761.31	-0.000198756	1.88362e-07	-4.08068e-19	1.91635e-07
1761.96	-0.000182099	3.66921e-07	-2.12138e-18	3.73296e-07
1762.6	-0.000131701	6.96297e-07	-1.06093e-17	7.08396e-07
1763.24	-7.3087e-05	1.28725e-06	-5.10423e-17	1.30961e-06
1763.88	-2.87321e-05	2.31831e-06	-2.36241e-16	2.35859e-06
1764.53	-1.4242e-06	4.06749e-06	-1.05186e-15	4.13816e-06
1765.17	1.57869e-05	6.95224e-06	-4.50551e-15	7.07304e-06
1765.81	2.3176e-05	1.15762e-05	-1.85655e-14	1.17774e-05
1766.46	1.63131e-05	1.87782e-05	-7.35952e-14	1.91045e-05
1767.1	2.46542e-06	2.96746e-05	-2.80654e-13	3.01902e-05
1767.74	3.18725e-06	4.56834e-05	-1.02961e-12	4.64772e-05
1768.38	3.34055e-05	6.85136e-05	-3.63374e-12	6.97041e-05
1769.03	8.27861e-05	0.000100101	-1.23372e-11	0.000101841
1769.67	0.00012327	0.000142477	-4.02953e-11	0.000144953
1770.31	0.000133274	0.000197558	-1.26612e-10	0.000200991
1770.96	0.000116317	0.000266864	-3.82713e-10	0.000271501
1771.6	0.000105064	0.000351178	-1.11289e-09	0.000357281
1772.24	0.0001465	0.000450202	-3.11322e-09	0.000458028
1772.88	0.000268433	0.000562251	-8.37812e-09	0.000572029
1773.53	0.000453199	0.000684059	-2.16902e-08	0.000695967
1774.17	0.000652952	0.00081076	-5.40206e-08	0.000824902
1774.81	0.000832806	0.000936094	-1.2943e-07	0.000952491
1775.46	0.000990598	0.00105	-2.98325e-07	0.00107
1776.1	0.00113	0.00115	-6.61492e-07	0.00117
1776.74	0.00126	0.00123	-1.41104e-06	0.00125
1777.38	0.00135	0.00128	-2.89555e-06	0.0013
1778.03	0.00138	0.00129	-5.71616e-06	0.00132
1778.67	0.00135	0.00127	-1.08557e-05	0.0013
1779.31	0.00127	0.00121	-1.9833e-05	0.00125
1779.96	0.00115	0.00112	-3.48578e-05	0.00117
1780.6	0.00102	0.000994191	-5.89374e-05	0.00107
1781.24	0.000871472	0.000840358	-9.58651e-05	0.000952491
1781.88	0.000718018	0.000660807	-0.000150007	0.000824902
1782.53	0.000546622	0.000458272	-0.000225808	0.000695967
1783.17	0.00035001	0.00023526	-0.000327	0.000572029
1783.81	0.000129749	-5.34432e-06	-0.00045555	0.000458028
1784.45	-0.000105303	-0.000259346	-0.000610525	0.000357281
1785.1	-0.000347499	-0.000520272	-0.000787136	0.000271501
1785.74	-0.000596589	-0.000778726	-0.000976284	0.000200991
1786.38	-0.000853838	-0.00102	-0.00116	0.000144953
1787.03	-0.00111	-0.00124	-0.00134	0.000101841
1787.67	-0.00134	-0.00141	-0.00148	6.97041e-05
1788.31	-0.00152	-0.00152	-0.00157	4.64772e-05
1788.95	-0.00162	-0.00157	-0.0016	3.01902e-05
1789.6	-0.00165	-0.00156	-0.00158	1.91045e-05
1790.24	-0.00161	-0.00148	-0.00149	1.17774e-05
1790.88	-0.0015	-0.00135	-0.00136	7.07304e-06
1791.53	-0.00135	-0.00118	-0.00119	4.13816e-06
1792.17	-0.00115	-0.000997012	-0.00099933	2.35859e-06
1792.81	-0.000918544	-0.000808199	-0.000809486	1.30961e-06
1793.45	-0.00066973	-0.0006301	-0.000630796	7.08396e-07
1794.1	-0.000449197	-0.00047251	-0.000472877	3.73296e-07
1794.74	-0.000283192	-0.000340837	-0.000341026	1.91635e-07
1795.38	-0.000167983	-0.000236501	-0.000236595	9.58386e-08
1796.03	-8.43091e-05	-0.000157862	-0.000157907	4.66928e-08
1796.67	-1.9944e-05	-0.000101365	-0.000101386	2.21617e-08
1797.31	2.46215e-05	-6.26132e-05	-6.26233e-05	1.02471e-08
1797.95	4.68769e-05	-3.72065e-05	-3.72111e-05	4.61574e-09
1798.6	5.22322e-05	-2.1269e-05	-2.1271e-05	2.02547e-09
1799.24	5.2214e-05	-1.16964e-05	-1.16972e-05	8.65877e-10
1799.88	5.53019e-05	-6.18773e-06	-6.18809e-06	3.60603e-10
1800.53	6.14966e-05	-3.14913e-06	-3.14927e-06	1.46301e-10
1801.17	6.77144e-05	-1.5418e-06	-1.54185e-06	5.78239e-11
1801.81	7.5111e-05	-7.26178e-07	-7.26199e-07	2.22645e-11
1802.45	8.69359e-05	-3.29031e-07	-3.29039e-07	8.35145e-12
1803.1	0.00010167	-1.4342e-07	-1.43423e-07	3.05179e-12
1803.74	0.000113287	-6.01399e-08	-6.0141e-08	1.08641e-12
1804.38	0.000118554	-2.42602e-08	-2.42606e-08	3.76767e-13
1805.03	0.000119291	-9.41467e-09	-9.41479e-09	1.27291e-13
1805.67	0.000117912	-3.51475e-09	-3.5148e-09	4.18955e-14
1806.31	0.00011526	-1.26231e-09	-1.26232e-09	1.34332e-14
1806.95	0.000111963	-4.36127e-10	-4.36131e-10	4.19601e-15
1807.6	0.000108833	-1.44958e-10	-1.44959e-10	1.27684e-15
1808.24	0.00010445	-4.63499e-11	-4.63502e-11	3.78515e-16
1808.88	9.55283e-05	-1.42572e-11	-1.42573e-11	1.09313e-16
1809.52	8.18384e-05	-4.21892e-12	-4.21895e-12	3.07542e-17
1810.17	6.78894e-05	-1.20101e-12	-1.20102e-12	8.4291e-18
1810.81	5.92109e-05	-3.28906e-13	-3.28909e-13	2.25062e-18
1811.45	5.70113e-05	-8.66516e-14	-8.66522e-14	5.85419e-19
1812.1	5.88482e-05	-2.19614e-14	-2.19616e-14	1.48346e-19
1812.74	6.21898e-05	-5.35456e-15	-5.3546e-15	3.66208e-20
1813.38	6.58679e-05	-1.25593e-15	-1.25594e-15	8.80694e-21
1814.02	6.82819e-05	-2.83393e-16	-2.83395e-16	2.06332e-21
1814.67	6.71684e-05	-6.15163e-17	-6.15168e-17	4.70924e-22
1815.31	6.09569e-05	-1.28461e-17	-1.28462e-17	1.04708e-22
1815.95	5.02969e-05	-2.58066e-18	-2.58069e-18	2.26804e-23
1816.6	3.82151e-05	-4.98737e-19	-4.98741e-19	4.78595e-24
1817.24	2.91757e-05	-9.27236e-20	-9.27246e-20	9.8385e-25
1817.88	2.62277e-05	-1.6584e-20	-1.65842e-20	1.9703e-25
1818.52	2.8471e-05	-2.85342e-21	-2.85346e-21	3.84399e-26
1819.17	3.20554e-05	-4.72306e-22	-4.72313e-22	7.30591e-27
1819.81	3.41287e-05	-7.52072e-23	-7.52086e-23	1.35273e-27
1820.45	3.45807e-05	-1.15206e-23	-1.15208e-23	2.44001e-28
1821.1	3.43445e-05	-1.69773e-24	-1.69778e-24	4.28761e-29
1821.74	3.34737e-05	-2.40682e-25	-2.40689e-25	7.3398e-30
1822.38	2.98242e-05	-3.28243e-26	-3.28255e-26	1.22404e-30
1823.02	1.89645e-05	-4.30651e-27	-4.30671e-27	1.98862e-31
1823.67	-1.82334e-06	-5.43544e-28	-5.43575e-28	3.14741e-32
1824.31	-2.58694e-05	-6.59966e-29	-6.60014e-29	4.85286e-33
1824.95	-3.89489e-05	-7.70878e-30	-7.7095e-30	7.2893e-34
1825.6	-3.21643e-05	-8.66216e-31	-8.6632e-31	1.06664e-34
1826.24	-1.18843e-05	-9.36356e-32	-9.36506e-32	1.52053e-35
1826.88	4.85337e-06	-9.73709e-33	-9.73916e-33	2.11161e-36
1827.52	3.32041e-06	-9.74063e-34	-9.74344e-34	2.85679e-37
1828.17	-1.97598e-05	-9.3737e-35	-9.3774e-35	3.76519e-38
1828.81	-5.34632e-05	-8.6775e-36	-8.68225e-36	4.83436e-39
1829.45	-7.72395e-05	-7.72729e-37	-7.73324e-37	6.04693e-40
1830.09	-7.54631e-05	-6.61904e-38	-6.62628e-38	7.36843e-41
1830.74	-5.12694e-05	-5.45348e-39	-5.46208e-39	8.747e-42
1831.38	-2.29329e-05	-4.32143e-40	-4.33137e-40	1.01155e-42
1832.02	-5.83757e-06	-3.29304e-41	-3.30425e-41	1.13962e-43
1832.67	-1.02497e-06	-2.41263e-42	-2.42493e-42	1.25076e-44
1833.31	-8.71622e-07	-1.69886e-43	-1.712e-43	1.33732e-45
1833.95	2.34283e-07	-1.14907e-44	-1.16276e-44	1.39296e-46
1834.59	2.21975e-06	-7.45828e-46	-7.59722e-46	1.41347e-47
1835.24	2.06132e-06	-4.63794e-47	-4.77528e-47	1.39727e-48
1835.88	-2.73545e-06	-2.75524e-48	-2.8875e-48	1.3456e-49
1836.52	-1.13942e-05	-1.55559e-49	-1.67968e-49	1.26239e-50
1837.17	-2.00319e-05	-8.26551e-51	-9.39957e-51	1.15377e-51
1837.81	-2.48247e-05	-4.0505e-52	-5.06023e-52	1.02727e-52
1838.45	-2.47134e-05	-1.74484e-53	-2.62066e-53	8.91042e-54
1839.09	-2.26245e-05	-5.65597e-55	-1.30567e-54	7.52929e-55
1839.74	-2.30644e-05	-1.65787e-57	-6.25796e-56	6.19803e-56
1840.38	-2.84083e-05	2.00013e-57	-2.88544e-57	4.97047e-57
1841.02	-3.91393e-05	2.53695e-58	-1.27989e-58	3.88316e-58
1841.67	-6.06501e-05	2.35878e-59	-5.46148e-60	2.9554e-59
1842.31	-0.000102588	1.92963e-60	-2.24196e-61	2.19125e-60
1842.95	-0.00016256	1.46718e-61	-8.85373e-63	1.58275e-61
1843.59	-0.000213288	1.06106e-62	-3.36359e-64	1.11372e-62
1844.24	-0.000221006	7.38122e-64	-1.22931e-65	7.63454e-64
1844.88	-0.000181099	4.96811e-65	-4.32211e-67	5.09841e-65
1845.52	-0.000124151	3.24561e-66	-1.46188e-68	3.31688e-66
1846.17	-8.38381e-05	2.06152e-67	-4.75671e-70	2.10218e-67
1846.81	-6.75943e-05	1.27428e-68	-1.48895e-71	1.29794e-68
1847.45	-6.11954e-05	7.66912e-70	-4.48368e-73	7.80693e-70
1848.09	-5.03948e-05	4.49516e-71	-1.29888e-74	4.57459e-71
1848.74	-3.16671e-05	2.5664e-72	-3.61977e-76	2.61136e-72
1849.38	-8.08841e-06	1.4273e-73	-9.70449e-78	1.4522e-73
1850.02	1.67064e-05	7.73276e-75	-2.5029e-79	7.86738e-75
1850.66	4.10719e-05	4.08121e-76	-6.21005e-81	4.15219e-76
1851.31	6.51506e-05	2.09838e-77	-1.48226e-82	2.13486e-77
1851.95	8.96512e-05	1.05104e-78	-3.40358e-84	1.06931e-78
1852.59	0.000114225	5.12863e-80	-7.51839e-86	5.21775e-80
1853.24	0.000137367	2.43795e-81	-1.5977e-87	2.48031e-81
1853.88	0.000157104	1.129e-82	-3.2662e-89	1.14861e-82
1854.52	0.000172812	5.09335e-84	-6.42348e-91	5.18185e-84
1855.16	0.000185988	2.23851e-85	-1.21528e-92	2.2774e-85
1855.81	0.000198966	9.58424e-87	-2.21189e-94	9.75078e-87
1856.45	0.000212208	3.99761e-88	-3.87285e-96	4.06708e-88
1857.09	0.000224247	1.62438e-89	-6.52343e-98	1.65261e-89
1857.74	0.000233609	6.43012e-91	-1.05706e-99	6.54185e-91
1858.38	0.000240362	2.47967e-92	-1.6478e-101	2.52276e-92
1859.02	0.0002461	9.31908e-94	-2.47109e-103	9.48094e-94
1859.66	0.00025274	4.51075e-95	-3.56494e-105	4.56951e-95
1860.31	0.000261652	3.45393e-94	-4.94761e-107	3.45265e-94
1860.95	0.000272786	1.04585e-92	-6.60569e-109	1.04539e-92
1861.59	0.000285597	3.09018e-91	-8.48437e-111	3.08884e-91
1862.24	0.000300281	8.87835e-90	-1.04834e-112	8.8745e-90
1862.88	0.000317463	2.48035e-88	-1.24612e-114	2.47927e-88
1863.52	0.000335743	6.73791e-87	-1.42496e-116	6.73499e-87
1864.16	0.000350406	1.77979e-85	-1.56755e-118	1.77902e-85
1864.81	0.000355648	4.57137e-84	-1.6589e-120	4.56938e-84
1865.45	0.000348944	1.14171e-82	-1.68888e-122	1.14121e-82
1866.09	0.00033273	2.77265e-81	-1.65408e-124	2.77145e-81
1866.74	0.0003103	6.54737e-80	-1.55845e-126	6.54453e-80
1867.38	0.000282906	1.50339e-78	-1.41257e-128	1.50274e-78
1868.02	0.000252761	3.35666e-77	-1.23171e-130	3.35521e-77
1868.66	0.000227912	7.28745e-76	-1.0332e-132	7.28429e-76
1869.31	0.000217196	1.53842e-74	-8.33755e-135	1.53776e-74
1869.95	0.000219979	3.15797e-73	-6.47251e-137	3.1566e-73
1870.59	0.000224862	6.30336e-72	-4.83378e-139	6.30063e-72
1871.23	0.000220953	1.2234e-70	-3.47281e-141	1.22287e-70
1871.88	0.000207	2.30885e-69	-2.40023e-143	2.30785e-69
1872.52	0.000188129	4.23698e-68	-1.5959e-145	4.23514e-68
1873.16	0.000168089	7.56046e-67	-1.02079e-147	7.55718e-67
1873.81	0.000147243	1.31181e-65	-6.2813e-150	1.31124e-65
1874.45	0.000125853	2.21324e-64	-3.71826e-152	2.21228e-64
1875.09	0.000105789	3.63091e-63	-2.11744e-154	3.62934e-63
1875.73	8.8742e-05	5.79209e-62	-1.16001e-156	5.78958e-62
1876.38	7.37286e-05	8.98436e-61	-6.11349e-159	8.98046e-61
1877.02	5.85358e-05	1.3551e-59	-3.09955e-161	1.35451e-59
1877.66	4.23365e-05	1.98741e-58	-1.51177e-163	1.98654e-58
1878.31	2.6628e-05	2.83422e-57	-7.09339e-166	2.83299e-57
1878.95	1.31239e-05	3.93019e-56	-3.20185e-168	3.92849e-56
1879.59	1.6599e-06	5.29938e-55	-1.39045e-170	5.29708e-55
1880.23	-9.14251e-06	6.94814e-54	-1.45088e-171	6.94513e-54
1880.88	-1.97232e-05	8.85817e-53	-1.95076e-168	8.85433e-53
1881.52	-2.94269e-05	1.09812e-51	-2.55221e-165	1.09765e-51
1882.16	-3.75907e-05	1.3237e-50	-3.11908e-162	1.32313e-50
1882.81	-4.44982e-05	1.55154e-49	-3.56069e-159	1.55086e-49
1883.45	-5.0649e-05	1.76834e-48	-3.79699e-156	1.76757e-48
1884.09	-5.57603e-05	1.95975e-47	-3.78218e-153	1.9589e-47
1884.73	-5.91173e-05	2.11187e-46	-3.51918e-150	2.11096e-46
1885.38	-6.07355e-05	2.21293e-45	-3.05871e-147	2.21197e-45
1886.02	-6.17775e-05	2.25475e-44	-2.48332e-144	2.25377e-44
1886.66	-6.46281e-05	2.23389e-43	-1.88332e-141	2.23292e-43
1887.31	-7.25586e-05	2.15207e-42	-1.33418e-138	2.15114e-42
1887.95	-8.69928e-05	2.01597e-41	-8.82878e-136	2.01509e-41
1888.59	-0.000103409	1.8363e-40	-5.45738e-133	1.8355e-40
1889.23	-0.000112315	1.62642e-39	-3.15113e-130	1.62572e-39
1889.88	-0.000107356	1.40074e-38	-1.69959e-127	1.40013e-38
1890.52	-9.19689e-05	1.17304e-37	-8.56289e-125	1.17253e-37
1891.16	-7.56006e-05	9.55209e-37	-4.0299e-122	9.54795e-37
1891.81	-6.4801e-05	7.5634e-36	-1.7716e-119	7.56012e-36
1892.45	-5.97498e-05	5.82328e-35	-7.275e-117	5.82076e-35
1893.09	-5.79965e-05	4.35964e-34	-2.79061e-114	4.35775e-34
1893.73	-5.76866e-05	3.1737e-33	-9.99911e-112	3.17232e-33
1894.38	-5.68318e-05	2.24653e-32	-3.34674e-109	2.24555e-32
1895.02	-5.24154e-05	1.54629e-31	-1.04636e-106	1.54562e-31
1895.66	-4.25755e-05	1.03491e-30	-3.05587e-104	1.03446e-30
1896.3	-2.91385e-05	6.73509e-30	-8.33656e-102	6.73217e-30
1896.95	-1.67545e-05	4.26205e-29	-2.1244e-99	4.2602e-29
1897.59	-9.07515e-06	2.62256e-28	-5.0569e-97	2.62142e-28
1898.23	-5.52028e-06	1.56914e-27	-1.12442e-94	1.56846e-27
1898.88	-3.04358e-06	9.12922e-27	-2.33545e-92	9.12526e-27
1899.52	6.01278e-08	5.16459e-26	-4.53116e-90	5.16235e-26
1900.16	2.72439e-06	2.84099e-25	-8.21196e-88	2.83976e-25
1900.8	3.25689e-06	1.51962e-24	-1.39021e-85	1.51897e-24
1901.45	1.67892e-06	7.90378e-24	-2.19843e-83	7.90035e-24
1902.09	-6.76954e-07	3.99728e-23	-3.24744e-81	3.99555e-23
1902.73	-3.05932e-06	1.96574e-22	-4.48092e-79	1.96489e-22
1903.38	-5.80457e-06	9.39985e-22	-5.77552e-77	9.39578e-22
1904.02	-9.51734e-06	4.37066e-21	-6.95363e-75	4.36877e-21
1904.66	-1.36772e-05	1.97608e-20	-7.82042e-73	1.97523e-20
1905.3	-1.70636e-05	8.68751e-20	-8.21572e-71	8.68374e-20
1905.95	-1.93571e-05	3.71379e-19	-8.0623e-69	3.71218e-19
1906.59	-2.17139e-05	1.54373e-18	-7.39043e-67	1.54306e-18
1907.23	-2.55583e-05	6.2396e-18	-6.32816e-65	6.2369e-18
1907.88	-3.11225e-05	2.45231e-17	-5.06154e-63	2.45124e-17
1908.52	-3.7603e-05	9.37183e-17	-3.78168e-61	9.36777e-17
1909.16	-4.33025e-05	3.48262e-16	-2.63928e-59	3.48111e-16
1909.8	-4.64712e-05	1.2584e-15	-1.72061e-57	1.25786e-15
1910.45	-4.63059e-05	4.42146e-15	-1.0478e-55	4.41954e-15
1911.09	-4.42161e-05	1.51058e-14	-5.96032e-54	1.50992e-14
1911.73	-4.25201e-05	5.01826e-14	-3.16708e-52	5.01608e-14
1912.38	-4.25158e-05	1.62104e-13	-1.57198e-50	1.62034e-13
1913.02	-4.34147e-05	5.09176e-13	-7.28836e-49	5.08955e-13
1913.66	-4.3065e-05	1.55515e-12	-3.15654e-47	1.55448e-12
1914.3	-3.92106e-05	4.61861e-12	-1.277e-45	4.61661e-12
1914.95	-3.15548e-05	1.33377e-11	-4.82577e-44	1.33319e-11
1915.59	-2.3802e-05	3.74526e-11	-1.70349e-42	3.74364e-11
1916.23	-2.08561e-05	1.02262e-10	-5.6171e-41	1.02218e-10
1916.87	-2.09825e-05	2.71507e-10	-1.73014e-39	2.71389e-10
1917.52	-1.3357e-05	7.00935e-10	-4.9779e-38	7.00631e-10
1918.16	1.17346e-05	1.75957e-09	-1.33786e-36	1.75881e-09
1918.8	5.12882e-05	4.29505e-09	-3.35869e-35	4.29319e-09
1919.45	9.18539e-05	1.01944e-08	-7.87641e-34	1.019e-08
1920.09	0.000121964	2.35281e-08	-1.72538e-32	2.35179e-08
1920.73	0.000139724	5.28012e-08	-3.5305e-31	5.27783e-08
1921.37	0.000149559	1.15221e-07	-6.74818e-30	1.15171e-07
1922.02	0.000158337	2.44486e-07	-1.20485e-28	2.4438e-07
1922.66	0.000173059	5.04437e-07	-2.00946e-27	5.04218e-07
1923.3	0.000197523	1.01203e-06	-3.13055e-26	1.01159e-06
1923.95	0.000228346	1.97428e-06	-4.55576e-25	1.97342e-06
1924.59	0.000258158	3.74505e-06	-6.19296e-24	3.74342e-06
1925.23	0.00028347	6.90777e-06	-7.8638e-23	6.90478e-06
1925.87	0.000307552	1.23894e-05	-9.32748e-22	1.2384e-05
1926.52	0.000335907	2.16071e-05	-1.03346e-20	2.15977e-05
1927.16	0.000371417	3.66414e-05	-1.0696e-19	3.66255e-05
1927.8	0.000413501	6.042e-05	-1.03406e-18	6.03938e-05
1928.45	0.000460368	9.68772e-05	-9.33824e-18	9.68352e-05
1929.09	0.000511875	0.000151041	-7.87742e-17	0.000150975
1929.73	0.000571582	0.000228981	-6.20726e-16	0.000228881
1930.37	0.000646365	0.000337548	-4.56892e-15	0.000337401
1931.02	0.000743612	0.000483842	-3.14141e-14	0.000483632
1931.66	0.000869089	0.000674379	-2.01759e-13	0.000674087
1932.3	0.00103	0.000913979	-1.21042e-12	0.000913583
1932.95	0.00123	0.0012	-6.7833e-12	0.0012
1933.59	0.00147	0.00154	-3.55092e-11	0.00154
1934.23	0.00177	0.00192	-1.73636e-10	0.00192
1934.87	0.00212	0.00233	-7.93111e-10	0.00233
1935.52	0.00251	0.00275	-3.38397e-09	0.00274
1936.16	0.00294	0.00314	-1.3487e-08	0.00314
1936.8	0.00336	0.0035	-5.02115e-08	0.0035
1937.44	0.00375	0.00379	-1.74618e-07	0.00379
1938.09	0.00406	0.004	-5.67244e-07	0.00399
1938.73	0.00425	0.00409	-1.72127e-06	0.00409
1939.37	0.0043	0.00407	-4.87894e-06	0.00407
1940.02	0.00417	0.00393	-1.29181e-05	0.00394
1940.66	0.00387	0.00368	-3.195e-05	0.00371
1941.3	0.0034	0.00333	-7.38143e-05	0.0034
1941.94	0.00281	0.00287	-0.000159297	0.00303
1942.59	0.00213	0.0023	-0.000321122	0.00262
1943.23	0.00137	0.0016	-0.000604688	0.00221
1943.87	0.000517893	0.000742652	-0.00106	0.00181
1944.52	-0.000454991	-0.000310057	-0.00175	0.00144
1945.16	-0.00159	-0.00157	-0.00268	0.00111
1945.8	-0.00291	-0.00301	-0.00385	0.00083678
1946.44	-0.00437	-0.00454	-0.00515	0.000612275
1947.09	-0.00586	-0.00601	-0.00644	0.000435626
1947.73	-0.00716	-0.00723	-0.00753	0.00030138
1948.37	-0.00807	-0.00801	-0.00822	0.000202743
1949.02	-0.00838	-0.00825	-0.00838	0.00013262
1949.66	-0.00804	-0.0079	-0.00798	8.43536e-05
1950.3	-0.00712	-0.00705	-0.0071	5.21712e-05
1950.94	-0.00584	-0.00587	-0.0059	3.13755e-05
1951.59	-0.00445	-0.00456	-0.00458	1.83477e-05
1952.23	-0.00317	-0.00331	-0.00332	1.04329e-05
1952.87	-0.00214	-0.00224	-0.00225	5.76846e-06
1953.52	-0.00139	-0.00142	-0.00142	3.10132e-06
1954.16	-0.000896375	-0.000839708	-0.00084133	1.62131e-06
1954.8	-0.000594007	-0.00046367	-0.000464495	8.24171e-07
1955.44	-0.000418651	-0.000239143	-0.00023955	4.07381e-07
1956.09	-0.000319824	-0.000115212	-0.000115408	1.95805e-07
1956.73	-0.000264328	-5.1864e-05	-5.19556e-05	9.15357e-08
1957.37	-0.000232023	-2.18591e-05	-2.19008e-05	4.17528e-08
1958.02	-0.000209948	-8.73946e-06	-8.75879e-06	1.9316e-08
1958.66	-0.000189335	-3.59376e-06	-3.60645e-06	1.26801e-08
1959.3	-0.000165587	-2.13957e-06	-2.16497e-06	2.53749e-08
1959.94	-0.000138408	-2.69342e-06	-2.78721e-06	9.3686e-08
1960.59	-0.0001106	-4.99049e-06	-5.34158e-06	3.50727e-07
1961.23	-8.55621e-05	-9.55678e-06	-1.07622e-05	1.20415e-06
1961.87	-6.55751e-05	-1.7261e-05	-2.10173e-05	3.75242e-06
1962.51	-5.09901e-05	-2.8677e-05	-3.92901e-05	1.06022e-05
1963.16	-4.06014e-05	-4.30031e-05	-7.01884e-05	2.71574e-05
1963.8	-3.17725e-05	-5.66614e-05	-0.00011979	6.30638e-05
1964.44	-2.07716e-05	-6.24173e-05	-0.000195315	0.000132761
1965.09	-4.23213e-06	-5.06005e-05	-0.000304234	0.000253373
1965.73	1.87912e-05	-1.38996e-05	-0.000452729	0.000438379
1966.37	4.54364e-05	4.46942e-05	-0.000643616	0.000687604
1967.01	6.65904e-05	0.000104626	-0.000874124	0.000977745
1967.66	6.41698e-05	0.00012754	-0.00113	0.00126
1968.3	1.09045e-05	6.8649e-05	-0.00141	0.00147
1968.94	-0.000121504	-0.000102612	-0.00166	0.00156
1969.59	-0.000347867	-0.000382947	-0.00188	0.0015
1970.23	-0.000655044	-0.000729033	-0.00204	0.00131
1970.87	-0.000997103	-0.00107	-0.0021	0.00103
1971.51	-0.0013	-0.00134	-0.00207	0.000737247
1972.16	-0.0015	-0.00147	-0.00195	0.000478293
1972.8	-0.00155	-0.00148	-0.00176	0.000281302
1973.44	-0.00144	-0.00136	-0.00151	0.000149986
1974.09	-0.00122	-0.00117	-0.00124	7.24987e-05
1974.73	-0.000938329	-0.000943703	-0.000975505	3.17693e-05
1975.37	-0.000669438	-0.000718886	-0.00073152	1.26207e-05
1976.01	-0.000447855	-0.00051951	-0.00052406	4.54526e-06
1976.66	-0.000288033	-0.000357183	-0.000358668	1.484e-06
1977.3	-0.000186293	-0.000234071	-0.000234511	4.39245e-07
1977.94	-0.000129262	-0.000146366	-0.000146484	1.17864e-07
1978.59	-0.000101524	-8.73843e-05	-8.7413e-05	2.86716e-08
1979.23	-9.03484e-05	-4.98269e-05	-4.98332e-05	6.32299e-09
1979.87	-8.7628e-05	-2.71394e-05	-2.71406e-05	1.26413e-09
1980.51	-8.86921e-05	-1.41212e-05	-1.41214e-05	2.29119e-10
1981.16	-9.04343e-05	-7.01928e-06	-7.01932e-06	3.7647e-11
1981.8	-9.07985e-05	-3.33325e-06	-3.33326e-06	5.60787e-12
1982.44	-8.91668e-05	-1.51217e-06	-1.51217e-06	7.57294e-13
1983.08	-8.68656e-05	-6.55376e-07	-6.55376e-07	9.27109e-14
1983.73	-8.52736e-05	-2.71355e-07	-2.71355e-07	1.02895e-14
1984.37	-8.46742e-05	-1.07335e-07	-1.07335e-07	1.03528e-15
1985.01	-8.3734e-05	-4.05607e-08	-4.05607e-08	9.44329e-17
1985.66	-8.14623e-05	-1.46429e-08	-1.46429e-08	7.80882e-18
1986.3	-7.79561e-05	-5.05015e-09	-5.05015e-09	5.85393e-19
1986.94	-7.37446e-05	-1.66395e-09	-1.66395e-09	3.9784e-20
1987.58	-6.87087e-05	-5.23762e-10	-5.23762e-10	2.45114e-21
1988.23	-6.20886e-05	-1.57502e-10	-1.57502e-10	1.36907e-22
1988.87	-5.44506e-05	-4.52476e-11	-4.52476e-11	6.93242e-24
1989.51	-4.90432e-05	-1.24183e-11	-1.24183e-11	3.18231e-25
1990.16	-4.92937e-05	-3.25602e-12	-3.25602e-12	1.32434e-26
1990.8	-5.41963e-05	-8.15585e-13	-8.15585e-13	4.99637e-28
1991.44	-5.76786e-05	-1.95168e-13	-1.95168e-13	1.70887e-29
1992.08	-5.43092e-05	-4.46177e-14	-4.46177e-14	5.29862e-31
1992.73	-4.40359e-05	-9.74458e-15	-9.74458e-15	1.48942e-32
1993.37	-3.13139e-05	-2.03318e-15	-2.03318e-15	3.79549e-34
1994.01	-2.02633e-05	-4.05273e-16	-4.05273e-16	8.76838e-36
1994.66	-1.20238e-05	-7.7175e-17	-7.7175e-17	1.83641e-37
1995.3	-5.50753e-06	-1.40399e-17	-1.40399e-17	3.48674e-39
1995.94	1.23043e-06	-2.4401e-18	-2.4401e-18	6.00161e-41
1996.58	9.36751e-06	-4.05145e-19	-4.05145e-19	9.36517e-43
1997.23	1.8375e-05	-6.42643e-20	-6.42643e-20	1.32484e-44
1997.87	2.7158e-05	-9.7384e-21	-9.7384e-21	1.69906e-46
1998.51	3.6365e-05	-1.40982e-21	-1.40982e-21	1.9754e-48
1999.16	4.82167e-05	-1.94983e-22	-1.94983e-22	2.08209e-50
1999.8	6.36522e-05	-2.57624e-23	-2.57624e-23	1.9895e-52
2000.44	8.12862e-05	-3.25189e-24	-3.25189e-24	1.72348e-54
2001.08	9.94055e-05	-3.92141e-25	-3.92141e-25	1.35401e-56
2001.73	0.000117437	-4.51758e-26	-4.51758e-26	9.67509e-59
2002.37	0.000134993	-4.97196e-27	-4.97196e-27	6.47285e-61
2003.01	0.000151211	-5.22766e-28	-5.22766e-28	5.2179e-63
2003.65	0.000165592	-5.25103e-29	-5.25103e-29	1.1476e-64
2004.3	0.000178106	-5.03895e-30	-5.03895e-30	5.70365e-66
2004.94	0.000188241	-4.61947e-31	-4.61947e-31	3.21087e-67
2005.58	0.00019452	-4.04579e-32	-4.04579e-32	1.79114e-68
2006.23	0.00019568	-3.3851e-33	-3.3851e-33	3.52097e-69
2006.87	0.000191958	-2.70581e-34	-2.70581e-34	7.15255e-68
2007.51	0.000184533	-2.06624e-35	-2.06624e-35	1.92425e-66
2008.15	0.000173882	-1.50738e-36	-1.50738e-36	4.99124e-65
2008.8	0.000159842	-1.05056e-37	-1.05056e-37	1.24736e-63
2009.44	0.000142362	-6.99485e-39	-6.99485e-39	3.00342e-62
2010.08	0.000121807	-4.44932e-40	-4.44932e-40	6.96752e-61
2010.73	9.81045e-05	-2.70375e-41	-2.70375e-41	1.55732e-59
2011.37	7.13962e-05	-1.56963e-42	-1.56963e-42	3.35365e-58
2012.01	4.31509e-05	-8.7053e-44	-8.7053e-44	6.95815e-57
2012.65	1.59698e-05	-4.61243e-45	-4.61243e-45	1.39094e-55
2013.3	-8.45489e-06	-2.33471e-46	-2.33471e-46	2.67894e-54
2013.94	-3.07927e-05	-1.129e-47	-1.129e-47	4.97113e-53
2014.58	-5.29575e-05	-5.20665e-49	-5.21571e-49	8.88762e-52
2015.23	-7.55443e-05	-7.42022e-51	-2.30192e-50	1.53093e-50
2015.87	-9.6846e-05	2.57912e-49	-9.70564e-52	2.54075e-49
2016.51	-0.000114589	4.13947e-48	-3.90946e-53	4.06263e-48
2017.15	-0.000128057	6.37723e-47	-1.50441e-54	6.2588e-47
2017.8	-0.000138418	9.46574e-46	-5.53062e-56	9.28995e-46
2018.44	-0.000147915	1.35368e-44	-1.9424e-57	1.32854e-44
2019.08	-0.000158341	1.86515e-43	-6.51722e-59	1.83052e-43
2019.73	-0.000169771	2.47601e-42	-2.08902e-60	2.43003e-42
2020.37	-0.00018057	3.16685e-41	-6.39708e-62	3.10804e-41
2021.01	-0.000189211	3.90249e-40	-1.87145e-63	3.83002e-40
2021.65	-0.000195841	4.63335e-39	-5.23036e-65	4.5473e-39
2022.3	-0.000201853	5.30012e-38	-1.39651e-66	5.20169e-38
2022.94	-0.000208109	5.84138e-37	-3.56216e-68	5.7329e-37
2023.58	-0.000213759	6.20274e-36	-8.68042e-70	6.08754e-36
2024.23	-0.000217408	6.34585e-35	-2.02081e-71	6.228e-35
2024.87	-0.000218444	6.2551e-34	-4.49437e-73	6.13893e-34
2025.51	-0.000217231	5.94042e-33	-9.54924e-75	5.8301e-33
2026.15	-0.000214371	5.43549e-32	-1.93833e-76	5.33454e-32
2026.8	-0.000210391	4.7918e-31	-3.75875e-78	4.70281e-31
2027.44	-0.000205336	4.07002e-30	-6.96333e-80	3.99443e-30
2028.08	-0.000198689	3.33068e-29	-1.23239e-81	3.26883e-29
2028.72	-0.000189391	2.62608e-28	-2.08371e-83	2.57731e-28
2029.37	-0.000177262	1.9949e-27	-3.36577e-85	1.95785e-27
2030.01	-0.000163358	1.46007e-26	-5.19385e-87	1.43295e-26
2030.65	-0.000149333	1.02959e-25	-7.65688e-89	1.01047e-25
2031.3	-0.000136317	6.99506e-25	-1.07838e-90	6.86515e-25
2031.94	-0.000123527	4.57887e-24	-1.56603e-92	4.49383e-24
2032.58	-0.000109433	2.88778e-23	-7.42877e-91	2.83415e-23
2033.22	-9.34539e-05	1.75472e-22	-4.32493e-88	1.72213e-22
2033.87	-7.7353e-05	1.02728e-21	-2.27272e-85	1.0082e-21
2034.51	-6.36624e-05	5.79441e-21	-1.07773e-82	5.6868e-21
2035.15	-5.30363e-05	3.14897e-20	-4.61178e-80	3.09049e-20
2035.8	-4.36627e-05	1.64879e-19	-1.78084e-77	1.61817e-19
2036.44	-3.30592e-05	8.31765e-19	-6.20549e-75	8.16318e-19
2037.08	-2.01961e-05	4.04273e-18	-1.9513e-72	3.96765e-18
2037.72	-4.70685e-06	1.89316e-17	-5.53692e-70	1.858e-17
2038.37	1.35068e-05	8.54157e-17	-1.41778e-67	8.38294e-17
2039.01	3.35001e-05	3.71302e-16	-3.276e-65	3.64406e-16
2039.65	5.2935e-05	1.55509e-15	-6.83088e-63	1.52621e-15
2040.3	7.05539e-05	6.27509e-15	-1.2853e-60	6.15856e-15
2040.94	8.73937e-05	2.43963e-14	-2.18238e-58	2.39432e-14
2041.58	0.000104968	9.13833e-14	-3.34388e-56	8.96862e-14
2042.22	0.000122728	3.29798e-13	-4.62347e-54	3.23673e-13
2042.87	0.000138886	1.14675e-12	-5.76874e-52	1.12545e-12
2043.51	0.000152997	3.84171e-12	-6.49516e-50	3.77037e-12
2044.15	0.000165777	1.24e-11	-6.59926e-48	1.21697e-11
2044.8	0.000177563	3.85617e-11	-6.05058e-46	3.78455e-11
2045.44	0.000187478	1.15539e-10	-5.00604e-44	1.13393e-10
2046.08	0.000194389	3.33534e-10	-3.73756e-42	3.2734e-10
2046.72	0.000197912	9.27662e-10	-2.51813e-40	9.10434e-10
2047.37	0.000198389	2.48587e-09	-1.53096e-38	2.4397e-09
2048.01	0.000196919	6.41807e-09	-8.39936e-37	6.29887e-09
2048.65	0.000194879	1.5965e-08	-4.15838e-35	1.56685e-08
2049.29	0.000193271	3.82624e-08	-1.8578e-33	3.75518e-08
2049.94	0.000191634	8.83515e-08	-7.48978e-32	8.67107e-08
2050.58	0.000189051	1.96559e-07	-2.72481e-30	1.92909e-07
2051.22	0.000185339	4.2132e-07	-8.94538e-29	4.13496e-07
2051.87	0.000181921	8.701e-07	-2.65007e-27	8.53941e-07
2052.51	0.000180565	1.73127e-06	-7.08456e-26	1.69912e-06
2053.15	0.000181778	3.31893e-06	-1.70909e-24	3.25729e-06
2053.79	0.000184772	6.13013e-06	-3.72058e-23	6.01629e-06
2054.44	0.000188318	1.09089e-05	-7.30894e-22	1.07063e-05
2055.08	0.000192143	1.87038e-05	-1.29567e-20	1.83564e-05
2055.72	0.00019822	3.0897e-05	-2.07267e-19	3.03232e-05
2056.37	0.000209398	4.91747e-05	-2.992e-18	4.82614e-05
2057.01	0.000227906	7.54059e-05	-3.89753e-17	7.40055e-05
2057.65	0.000254495	0.000111406	-4.58156e-16	0.000109337
2058.29	0.000289318	0.00015858	-4.85998e-15	0.000155635
2058.94	0.000332575	0.000217484	-4.65211e-14	0.000213445
2059.58	0.000383232	0.000287372	-4.01849e-13	0.000282035
2060.22	0.000438496	0.000365848	-3.13236e-12	0.000359053
2060.87	0.000494873	0.00044874	-2.20331e-11	0.000440406
2061.51	0.000549652	0.000530306	-1.39855e-10	0.000520458
2062.15	0.000600374	0.000603806	-8.01077e-10	0.000592593
2062.79	0.000644098	0.000662376	-4.14064e-09	0.000650079
2063.44	0.000676846	0.000700072	-1.93133e-08	0.00068709
2064.08	0.000694289	0.000712839	-8.1291e-08	0.00069968
2064.72	0.000691971	0.000699155	-3.08762e-07	0.000686474
2065.37	0.000664546	0.000660135	-1.05828e-06	0.000648914
2066.01	0.00060585	0.000598911	-3.27322e-06	0.000591001
2066.65	0.000512054	0.000519272	-9.13577e-06	0.000518594
2067.29	0.000384739	0.000423722	-2.30097e-05	0.000438436
2067.94	0.000230983	0.000311588	-5.22966e-05	0.000357127
2068.58	6.00386e-05	0.000178315	-0.000107259	0.00028027
2069.22	-0.00011948	1.74174e-05	-0.000198512	0.000211919
2069.86	-0.000299236	-0.000174236	-0.000331541	0.000154384
2070.51	-0.000469887	-0.00038926	-0.000499671	0.000108361
2071.15	-0.000620286	-0.000604893	-0.000679559	7.32791e-05
2071.79	-0.000737403	-0.000785351	-0.000834	4.77449e-05
2072.44	-0.000807782	-0.000893098	-0.000923637	2.99717e-05
2073.08	-0.00082188	-0.000904595	-0.000923066	1.81274e-05
2073.72	-0.000778415	-0.000821693	-0.000832456	1.05632e-05
2074.36	-0.000685479	-0.000671431	-0.000677474	5.93058e-06
2075.01	-0.000557862	-0.000494306	-0.000497575	3.20801e-06
2075.65	-0.000414356	-0.000328244	-0.000329947	1.67191e-06
2076.29	-0.000275568	-0.000197182	-0.000198037	8.39515e-07
2076.94	-0.00016164	-0.000108754	-0.000109168	4.06146e-07
2077.58	-8.9372e-05	-5.95378e-05	-5.97307e-05	1.8931e-07
2078.22	-7.08587e-05	-4.3078e-05	-4.31646e-05	8.50169e-08
2078.86	-0.00011332	-5.63191e-05	-5.63566e-05	3.67853e-08
2079.51	-0.000217079	-0.000102139	-0.000102155	1.53349e-08
2080.15	-0.000370944	-0.000187289	-0.000187295	6.15924e-09
2080.79	-0.000550085	-0.000316171	-0.000316174	2.38348e-09
2081.44	-0.000719701	-0.000482612	-0.000482613	8.88656e-10
2082.08	-0.000845657	-0.000664001	-0.000664001	3.19223e-10
2082.72	-0.000904594	-0.000822998	-0.000822998	1.10483e-10
2083.36	-0.000889334	-0.000918856	-0.000918856	3.6841e-11
2084.01	-0.000808573	-0.000924076	-0.000924076	1.18361e-11
2084.65	-0.000682981	-0.000837104	-0.000837104	3.66372e-12
2085.29	-0.000539069	-0.000683063	-0.000683063	1.09263e-12
2085.94	-0.000400785	-0.000502057	-0.000502057	3.13954e-13
2086.58	-0.000283049	-0.000332396	-0.000332396	8.69151e-14
2087.22	-0.000191048	-0.00019823	-0.00019823	2.31827e-14
2087.86	-0.000124255	-0.000106486	-0.000106486	5.95758e-15
2088.51	-7.99105e-05	-5.15261e-05	-5.15261e-05	1.47508e-15
2089.15	-5.41789e-05	-2.2458e-05	-2.2458e-05	3.51882e-16
2089.79	-4.20716e-05	-8.81713e-06	-8.81713e-06	8.08759e-17
2090.43	-3.88683e-05	-3.11812e-06	-3.11812e-06	1.79093e-17
2091.08	-4.07052e-05	-9.93274e-07	-9.93274e-07	3.821e-18
2091.72	-4.45387e-05	-2.85007e-07	-2.85007e-07	7.85441e-19
2092.36	-4.85021e-05	-7.36635e-08	-7.36635e-08	1.55557e-19
2093.01	-5.20256e-05	-1.71498e-08	-1.71498e-08	2.96826e-20
2093.65	-5.50607e-05	-3.59648e-09	-3.59648e-09	5.457e-21
2094.29	-5.76265e-05	-6.79371e-10	-6.79371e-10	9.66594e-22
2094.93	-5.96525e-05	-1.15597e-10	-1.15597e-10	1.64958e-22
2095.58	-6.18585e-05	-1.77172e-11	-1.77172e-11	2.71231e-23
2096.22	-6.44946e-05	-2.44599e-12	-2.44599e-12	4.2968e-24
2096.86	-6.62022e-05	-3.04176e-13	-3.04176e-13	6.55826e-25
2097.51	-6.48178e-05	-3.40727e-14	-3.40727e-14	9.64431e-26
2098.15	-6.00858e-05	-3.43794e-15	-3.43794e-15	1.36644e-26
2098.79	-5.38664e-05	-3.12464e-16	-3.12464e-16	1.86531e-27
2099.43	-4.83555e-05	-2.55807e-17	-2.55807e-17	2.45328e-28
2100.08	-4.44749e-05	-1.8864e-18	-1.8864e-18	3.10873e-29
2100.72	-4.17832e-05	-1.25305e-19	-1.25305e-19	3.7954e-30
2101.36	-3.91092e-05	-7.49742e-21	-7.49742e-21	4.46447e-31
2102.01	-3.49688e-05	-4.04079e-22	-4.04079e-22	5.05965e-32
2102.65	-2.91371e-05	-1.96169e-23	-1.96169e-23	5.52471e-33
2103.29	-2.34387e-05	-8.57839e-25	-8.57839e-25	5.81216e-34
2103.93	-2.01449e-05	-3.37902e-26	-3.37902e-26	5.89119e-35
2104.58	-1.86368e-05	-1.19891e-27	-1.19891e-27	5.75318e-36
2105.22	-1.56432e-05	-3.83172e-29	-3.83172e-29	5.41315e-37
2105.86	-9.03282e-06	-1.10309e-30	-1.10309e-30	4.90717e-38
2106.51	-3.77807e-07	-2.86048e-32	-2.86048e-32	4.28599e-39
2107.15	6.71563e-06	-6.68154e-34	-6.68154e-34	3.60669e-40
2107.79	1.03472e-05	-1.4058e-35	-1.40581e-35	2.92419e-41
2108.43	1.14775e-05	-2.66428e-37	-2.66431e-37	2.28423e-42
2109.08	1.24749e-05	-4.54817e-39	-4.54835e-39	1.71915e-43
2109.72	1.49553e-05	-6.99286e-41	-6.99413e-41	1.24659e-44
2110.36	1.89545e-05	-9.6789e-43	-9.68778e-43	8.70912e-46
2111.01	2.33536e-05	-1.20274e-44	-1.20872e-44	5.86222e-47
2111.65	2.65713e-05	-1.31969e-46	-1.35843e-46	3.8018e-48
2112.29	2.76743e-05	-1.13313e-48	-1.37518e-48	2.37549e-49
2112.93	2.70628e-05	2.03151e-51	-1.25398e-50	1.43007e-50
2113.58	2.61053e-05	7.42163e-52	-1.02999e-52	8.29467e-52
2114.22	2.60805e-05	4.64682e-53	-7.62055e-55	4.63531e-53
2114.86	2.82076e-05	2.53788e-54	-5.07867e-57	2.49573e-54
2115.5	3.31686e-05	1.31885e-55	-3.04877e-59	1.29466e-55
2116.15	4.05207e-05	6.59295e-57	-1.64858e-61	6.47068e-57
2116.79	4.77716e-05	3.17485e-58	-8.02979e-64	3.1159e-58
2117.43	5.19893e-05	1.47298e-59	-3.52298e-66	1.44562e-59
2118.08	5.21861e-05	6.58426e-61	-1.39228e-68	6.46198e-61
2118.72	4.987e-05	2.83567e-62	-4.95625e-71	2.78301e-62
2119.36	4.75248e-05	1.17664e-63	-1.58924e-73	1.15479e-63

## Sheet: Fig.2A bottom spectrum
X	data	fit	Hred'	Hred*	Hsred*
1690.6	-2.765e-05	0	0	0	0
1691.25	-1.90422e-05	0	0	0	0
1691.89	-1.30377e-05	0	0	0	0
1692.53	-1.12085e-05	--	0	0	--
1693.18	-1.34721e-05	--	0	0	--
1693.82	-2.1855e-05	--	0	0	--
1694.46	-3.5932e-05	--	0	0	--
1695.1	-4.74625e-05	--	0	0	--
1695.75	-4.62763e-05	--	0	0	--
1696.39	-3.31776e-05	--	0	0	--
1697.03	-2.17635e-05	-1.98433e-306	0	0	-1.98433e-306
1697.67	-2.40477e-05	-5.55192e-304	0	0	-5.55192e-304
1698.32	-3.7981e-05	-1.51818e-301	0	0	-1.51818e-301
1698.96	-5.03235e-05	-4.05741e-299	0	0	-4.05741e-299
1699.6	-4.95265e-05	-1.0598e-296	0	0	-1.0598e-296
1700.25	-3.31087e-05	-2.70552e-294	0	0	-2.70552e-294
1700.89	-7.86456e-06	-6.75033e-292	0	0	-6.75033e-292
1701.53	1.45124e-05	-1.64607e-289	0	0	-1.64607e-289
1702.17	2.51934e-05	-3.92301e-287	0	0	-3.92301e-287
1702.82	2.59708e-05	-9.13776e-285	0	0	-9.13776e-285
1703.46	2.68286e-05	-2.08022e-282	0	0	-2.08022e-282
1704.1	3.36455e-05	-4.62837e-280	0	0	-4.62837e-280
1704.75	4.02472e-05	-1.00646e-277	0	0	-1.00646e-277
1705.39	3.72947e-05	-2.139e-275	0	--	-2.139e-275
1706.03	2.62168e-05	-4.443e-273	0	--	-4.443e-273
1706.67	1.91285e-05	-9.01966e-271	0	--	-9.01966e-271
1707.32	2.49596e-05	-1.78959e-268	0	--	-1.78959e-268
1707.96	4.0339e-05	-3.47028e-266	0	--	-3.47028e-266
1708.6	5.53464e-05	-6.57696e-264	0	--	-6.57696e-264
1709.25	6.4087e-05	-1.21824e-261	0	--	-1.21824e-261
1709.89	6.63858e-05	-2.20543e-259	0	1.21713e-306	-2.20543e-259
1710.53	6.31642e-05	-3.90211e-257	0	3.41075e-304	-3.90211e-257
1711.17	5.40425e-05	-6.7477e-255	0	9.34139e-302	-6.7477e-255
1711.82	3.99271e-05	-1.14041e-252	0	2.50047e-299	-1.14041e-252
1712.46	2.47504e-05	-1.88371e-250	0	6.54155e-297	-1.88371e-250
1713.1	1.33442e-05	-3.04101e-248	0	1.67259e-294	-3.04101e-248
1713.75	8.34552e-06	-4.7981e-246	0	4.17971e-292	-4.7981e-246
1714.39	8.62154e-06	-7.39894e-244	0	1.02083e-289	-7.39894e-244
1715.03	1.00603e-05	-1.11511e-241	0	2.43673e-287	-1.11511e-241
1715.67	8.41383e-06	-1.64254e-239	0	5.68473e-285	-1.64254e-239
1716.32	3.18784e-06	-2.36464e-237	0	1.29617e-282	-2.36464e-237
1716.96	-1.62811e-06	-3.32706e-235	0	2.88844e-280	-3.32706e-235
1717.6	-1.70053e-06	-4.57515e-233	0	6.29092e-278	-4.57515e-233
1718.24	3.37238e-06	-6.14892e-231	0	1.3391e-275	-6.14892e-231
1718.89	1.03784e-05	-8.07684e-229	0	2.78587e-273	-8.07684e-229
1719.53	1.65124e-05	-1.03689e-226	0	5.66446e-271	-1.03689e-226
1720.17	2.13009e-05	-1.30099e-224	0	1.12565e-268	-1.30099e-224
1720.82	2.58201e-05	-1.59537e-222	0	2.18624e-266	-1.59537e-222
1721.46	3.02208e-05	-1.91206e-220	0	4.14994e-264	-1.91206e-220
1722.1	3.33032e-05	-2.23969e-218	0	7.69901e-262	-2.23969e-218
1722.74	3.22564e-05	-2.56403e-216	0	1.39597e-259	-2.56403e-216
1723.39	2.56071e-05	-2.86885e-214	0	2.47381e-257	-2.86885e-214
1724.03	1.56736e-05	-3.1372e-212	0	4.28455e-255	-3.1372e-212
1724.67	7.31256e-06	-3.35293e-210	0	7.25259e-253	-3.35293e-210
1725.32	3.31354e-06	-3.50232e-208	0	1.19986e-250	-3.50232e-208
1725.96	2.62343e-06	-3.57549e-206	0	1.94006e-248	-3.57549e-206
1726.6	3.54931e-06	-3.56751e-204	0	3.06584e-246	-3.56751e-204
1727.24	6.32705e-06	-3.47891e-202	0	4.73515e-244	-3.47891e-202
1727.89	1.03496e-05	-3.31566e-200	0	7.14769e-242	-3.31566e-200
1728.53	1.17495e-05	-3.08849e-198	0	1.0545e-239	-3.08849e-198
1729.17	7.04006e-06	-2.81171e-196	0	1.52047e-237	-2.81171e-196
1729.82	-1.99784e-06	-2.50175e-194	0	2.14267e-235	-2.50175e-194
1730.46	-9.39417e-06	-2.17554e-192	0	2.9511e-233	-2.17554e-192
1731.1	-1.22961e-05	-1.849e-190	0	3.97247e-231	-1.849e-190
1731.74	-1.48067e-05	-1.53588e-188	0	5.2262e-229	-1.53588e-188
1732.39	-2.2946e-05	-1.24689e-186	0	6.71987e-227	-1.24689e-186
1733.03	-3.49945e-05	-9.89339e-185	0	8.44469e-225	-9.89339e-185
1733.67	-4.06756e-05	-7.67206e-183	0	1.03718e-222	-7.67206e-183
1734.32	-3.19073e-05	-5.8147e-181	0	1.24502e-220	-5.8147e-181
1734.96	-1.27741e-05	-4.30717e-179	0	1.46065e-218	-4.30717e-179
1735.6	4.99704e-06	-3.11821e-177	0	1.67481e-216	-3.11821e-177
1736.24	1.49429e-05	-2.20632e-175	0	1.87687e-214	-2.20632e-175
1736.89	1.96194e-05	-1.52573e-173	0	2.05566e-212	-1.52573e-173
1737.53	2.18186e-05	-1.03119e-171	0	2.20047e-210	-1.03119e-171
1738.17	1.91753e-05	-6.81158e-170	0	2.30213e-208	-6.81158e-170
1738.82	9.35768e-06	-4.3975e-168	0	2.35393e-206	-4.3975e-168
1739.46	-3.97774e-06	-2.77468e-166	0	2.35237e-204	-2.77468e-166
1740.1	-1.47008e-05	-1.71107e-164	0	2.29756e-202	-1.71107e-164
1740.74	-2.11218e-05	-1.03127e-162	0	2.19319e-200	-1.03127e-162
1741.39	-2.60792e-05	-6.07472e-161	0	2.04614e-198	-6.07472e-161
1742.03	-3.08619e-05	-3.49726e-159	0	1.86571e-196	-3.49726e-159
1742.67	-3.34952e-05	-1.96779e-157	0	1.66264e-194	-1.96779e-157
1743.31	-3.25167e-05	-1.08213e-155	0	1.44812e-192	-1.08213e-155
1743.96	-3.01912e-05	-5.81605e-154	0	1.23271e-190	-5.81605e-154
1744.6	-3.03332e-05	-3.0551e-152	0	1.02556e-188	-3.0551e-152
1745.24	-3.30693e-05	-1.56846e-150	0	8.33901e-187	-1.56846e-150
1745.89	-3.46589e-05	-7.86988e-149	0	6.62697e-185	-7.86988e-149
1746.53	-3.19615e-05	-3.85934e-147	0	5.14713e-183	-3.85934e-147
1747.17	-2.67203e-05	-1.84972e-145	0	3.90718e-181	-1.84972e-145
1747.81	-2.3264e-05	-8.66459e-144	0	2.89875e-179	-8.66459e-144
1748.46	-2.27733e-05	-3.96679e-142	0	2.10188e-177	-3.96679e-142
1749.1	-2.26774e-05	-1.77492e-140	0	1.48954e-175	-1.77492e-140
1749.74	-2.10727e-05	-7.7619e-139	0	1.03169e-173	-7.7619e-139
1750.39	-1.92963e-05	-3.31746e-137	0	6.98378e-172	-3.31746e-137
1751.03	-1.95609e-05	-1.38577e-135	0	4.62043e-170	-1.38577e-135
1751.67	-2.11286e-05	-5.65754e-134	0	2.98761e-168	-5.65754e-134
1752.31	-2.08552e-05	-2.25742e-132	0	1.88805e-166	-2.25742e-132
1752.96	-1.76713e-05	-8.80329e-131	0	1.16614e-164	-8.80329e-131
1753.6	-1.48102e-05	-3.35527e-129	0	7.03945e-163	-3.35527e-129
1754.24	-1.66044e-05	-1.24985e-127	0	4.15313e-161	-1.24985e-127
1754.89	-2.26811e-05	-4.55028e-126	0	2.39475e-159	-4.55028e-126
1755.53	-2.74261e-05	-1.61907e-124	0	1.34957e-157	-1.61907e-124
1756.17	-2.54339e-05	-5.63046e-123	0	7.43323e-156	-5.63046e-123
1756.81	-1.68608e-05	-1.91369e-121	0	4.00138e-154	-1.91369e-121
1757.46	-5.67762e-06	-6.35691e-120	0	2.10518e-152	-6.35691e-120
1758.1	4.54681e-06	-2.06381e-118	0	1.08248e-150	-2.06381e-118
1758.74	1.15701e-05	-6.54852e-117	0	5.43999e-149	-6.54852e-117
1759.39	1.30939e-05	-2.03079e-115	0	2.67193e-147	-2.03079e-115
1760.03	8.35838e-06	-6.15511e-114	0	1.28263e-145	-6.15511e-114
1760.67	9.54936e-07	-1.82329e-112	0	6.01765e-144	-1.82329e-112
1761.31	-2.5635e-06	-5.27867e-111	0	2.75931e-142	-5.27867e-111
1761.96	7.94649e-07	-1.49363e-109	0	1.23659e-140	-1.49363e-109
1762.6	7.62462e-06	-4.13055e-108	0	5.41621e-139	-4.13055e-108
1763.24	1.23163e-05	-1.11641e-106	0	2.31855e-137	-1.11641e-106
1763.88	1.3104e-05	-2.94909e-105	0	9.70032e-136	-2.94909e-105
1764.53	1.23573e-05	-7.61379e-104	0	3.96647e-134	-7.61379e-104
1765.17	1.24268e-05	-1.92116e-102	0	1.58515e-132	-1.92116e-102
1765.81	1.2769e-05	-4.73776e-101	0	6.19139e-131	-4.73776e-101
1766.46	1.16069e-05	-1.14191e-99	0	2.36349e-129	-1.14191e-99
1767.1	8.9594e-06	-2.68993e-98	0	8.81793e-128	-2.68993e-98
1767.74	6.89786e-06	-6.19297e-97	0	3.21536e-126	-6.19297e-97
1768.38	6.67041e-06	-1.39349e-95	0	1.14589e-124	-1.39349e-95
1769.03	6.16125e-06	-3.06451e-94	0	3.99119e-123	-3.06451e-94
1769.67	1.1423e-06	-6.58665e-93	0	1.35866e-121	-6.58665e-93
1770.31	-1.08636e-05	-1.38362e-91	0	4.52033e-120	-1.38362e-91
1770.96	-2.6619e-05	-2.84066e-90	0	1.46986e-118	-2.84066e-90
1771.6	-3.78686e-05	-5.69993e-89	0	4.67125e-117	-5.69993e-89
1772.24	-3.67108e-05	-1.11781e-87	0	1.4509e-115	-1.11781e-87
1772.88	-2.26873e-05	-2.14249e-86	0	4.40445e-114	-2.14249e-86
1773.53	-4.23196e-06	-4.01342e-85	0	1.30676e-112	-4.01342e-85
1774.17	7.33783e-06	-7.34787e-84	0	3.78919e-111	-7.34787e-84
1774.81	6.76215e-06	-1.31479e-82	0	1.07386e-109	-1.31479e-82
1775.46	-2.26337e-06	-2.29933e-81	0	2.97438e-108	-2.29933e-81
1776.1	-1.23141e-05	-3.93001e-80	0	8.05182e-107	-3.93001e-80
1776.74	-1.88227e-05	-6.565e-79	0	2.1303e-105	-6.565e-79
1777.38	-2.18412e-05	-1.07183e-77	0	5.50855e-104	-1.07183e-77
1778.03	-2.21666e-05	-1.71027e-76	0	1.39214e-102	-1.71027e-76
1778.67	-1.92959e-05	-2.66719e-75	0	3.43855e-101	-2.66719e-75
1779.31	-1.31471e-05	-4.06528e-74	0	8.30077e-100	-4.06528e-74
1779.96	-5.90667e-06	-6.05587e-73	0	1.95844e-98	-6.05587e-73
1780.6	-5.58523e-07	-8.81681e-72	0	4.51596e-97	-8.81681e-72
1781.24	2.37968e-06	-1.25457e-70	0	1.01775e-95	-1.25457e-70
1781.88	5.06501e-06	-1.74473e-69	0	2.2417e-94	-1.74473e-69
1782.53	8.77536e-06	-2.37143e-68	0	4.82575e-93	-2.37143e-68
1783.17	1.1678e-05	-3.15022e-67	0	1.01531e-91	-3.15022e-67
1783.81	1.09009e-05	-4.08997e-66	0	2.08778e-90	-4.08997e-66
1784.45	7.32336e-06	-5.18977e-65	0	4.19584e-89	-5.18977e-65
1785.1	4.96503e-06	-6.43613e-64	0	8.24141e-88	-6.43613e-64
1785.74	6.1432e-06	-7.80102e-63	0	1.5821e-86	-7.80102e-63
1786.38	8.83888e-06	-9.24115e-62	0	2.96834e-85	-9.24115e-62
1787.03	1.02545e-05	-1.06992e-60	0	5.44305e-84	-1.06992e-60
1787.67	1.00288e-05	-1.21066e-59	0	9.75485e-83	-1.21066e-59
1788.31	9.53284e-06	-1.33889e-58	0	1.70863e-81	-1.33889e-58
1788.95	1.00408e-05	-1.44715e-57	0	2.92498e-80	-1.44715e-57
1789.6	1.20146e-05	-1.52874e-56	0	4.89382e-79	-1.52874e-56
1790.24	1.44637e-05	-1.57834e-55	0	8.00243e-78	-1.57834e-55
1790.88	1.43928e-05	-1.59264e-54	0	1.27892e-76	-1.59264e-54
1791.53	9.90224e-06	-1.57067e-53	0	1.99763e-75	-1.57067e-53
1792.17	3.16026e-06	-1.51391e-52	0	3.04955e-74	-1.51391e-52
1792.81	-8.93312e-07	-1.42614e-51	0	4.54993e-73	-1.42614e-51
1793.45	-2.4671e-07	-1.31303e-50	--	6.63472e-72	-1.31303e-50
1794.1	2.56698e-06	-1.18151e-49	--	9.45561e-71	-1.18151e-49
1794.74	4.35156e-06	-1.03908e-48	--	1.31706e-69	-1.03908e-48
1795.38	3.7735e-06	-8.93114e-48	--	1.79296e-68	-8.93114e-48
1796.03	6.98784e-07	-7.50265e-47	--	2.38552e-67	-7.50265e-47
1796.67	-4.41054e-06	-6.15988e-46	--	3.10203e-66	-6.15988e-46
1797.31	-9.52037e-06	-4.94285e-45	-1.42319e-307	3.94237e-65	-4.94285e-45
1797.95	-1.21645e-05	-3.87643e-44	-7.87206e-305	4.89685e-64	-3.87643e-44
1798.6	-1.09718e-05	-2.97123e-43	-4.23087e-302	5.94465e-63	-2.97123e-43
1799.24	-6.44142e-06	-2.22581e-42	-2.20947e-299	7.05316e-62	-2.22581e-42
1799.88	-6.34171e-08	-1.62963e-41	-1.12115e-296	8.17882e-61	-1.62963e-41
1800.53	5.78561e-06	-1.16611e-40	-5.52781e-294	9.26929e-60	-1.16611e-40
1801.17	8.63961e-06	-8.15529e-40	-2.64826e-291	1.02672e-58	-8.15529e-40
1801.81	7.87284e-06	-5.57426e-39	-1.23278e-288	1.11149e-57	-5.57426e-39
1802.45	5.72057e-06	-3.72378e-38	-5.57603e-286	1.176e-56	-3.72378e-38
1803.1	5.28234e-06	-2.43125e-37	-2.45066e-283	1.21607e-55	-2.43125e-37
1803.74	7.34054e-06	-1.5514e-36	-1.04654e-280	1.22902e-54	-1.5514e-36
1804.38	1.00475e-05	-9.67538e-36	-4.34256e-278	1.21397e-53	-9.67538e-36
1805.03	1.12428e-05	-5.8974e-35	-1.75087e-275	1.17194e-52	-5.8974e-35
1805.67	1.02781e-05	-3.51319e-34	-6.85925e-273	1.10574e-51	-3.51319e-34
1806.31	7.9583e-06	-2.04546e-33	-2.61106e-270	1.01964e-50	-2.04546e-33
1806.95	6.06414e-06	-1.16394e-32	-9.65768e-268	9.18948e-50	-1.16394e-32
1807.6	6.10819e-06	-6.4732e-32	-3.47093e-265	8.09439e-49	-6.4732e-32
1808.24	8.47797e-06	-3.51848e-31	-1.21209e-262	6.9683e-48	-3.51848e-31
1808.88	1.16313e-05	-1.86914e-30	-4.11284e-260	5.86297e-47	-1.86914e-30
1809.52	1.38918e-05	-9.70456e-30	-1.35601e-257	4.82123e-46	-9.70456e-30
1810.17	1.54684e-05	-4.92447e-29	-4.34414e-255	3.87477e-45	-4.92447e-29
1810.81	1.7784e-05	-2.44226e-28	-1.35226e-252	3.04358e-44	-2.44226e-28
1811.45	1.99224e-05	-1.18378e-27	-4.09008e-250	2.33653e-43	-1.18378e-27
1812.1	1.82775e-05	-5.60793e-27	-1.20204e-247	1.7531e-42	-5.60793e-27
1812.74	1.09794e-05	-2.59646e-26	-3.43262e-245	1.28555e-41	-2.59646e-26
1813.38	1.65655e-06	-1.17492e-25	-9.52462e-243	9.21348e-41	-1.17492e-25
1814.02	-3.46225e-06	-5.1962e-25	-2.56795e-240	6.45366e-40	-5.1962e-25
1814.67	-1.62767e-06	-2.24601e-24	-6.72731e-238	4.41811e-39	-2.24601e-24
1815.31	4.70167e-06	-9.48825e-24	-1.71243e-235	2.95608e-38	-9.48825e-24
1815.95	1.14877e-05	-3.9175e-23	-4.23546e-233	1.93306e-37	-3.9175e-23
1816.6	1.64728e-05	-1.58082e-22	-1.0179e-230	1.23544e-36	-1.58082e-22
1817.24	1.95827e-05	-6.23452e-22	-2.37699e-228	7.71702e-36	-6.23452e-22
1817.88	2.15625e-05	-2.4031e-21	-5.39343e-226	4.71113e-35	-2.4031e-21
1818.52	2.31574e-05	-9.05298e-21	-1.1891e-223	2.81092e-34	-9.05298e-21
1819.17	2.47473e-05	-3.33318e-20	-2.54736e-221	1.63916e-33	-3.33318e-20
1819.81	2.5863e-05	-1.19943e-19	-5.30246e-219	9.34209e-33	-1.19943e-19
1820.45	2.59085e-05	-4.21834e-19	-1.07246e-216	5.20373e-32	-4.21834e-19
1821.1	2.46156e-05	-1.44996e-18	-2.10767e-214	2.83292e-31	-1.44996e-18
1821.74	2.18801e-05	-4.87101e-18	-4.02475e-212	1.50731e-30	-4.87101e-18
1822.38	1.67261e-05	-1.5993e-17	-7.4678e-210	7.83828e-30	-1.5993e-17
1823.02	7.84976e-06	-5.13206e-17	-1.34637e-207	3.98371e-29	-5.13206e-17
1823.67	-3.98143e-06	-1.60954e-16	-2.35858e-205	1.9788e-28	-1.60954e-16
1824.31	-1.41927e-05	-4.93356e-16	-4.0147e-203	9.60654e-28	-4.93356e-16
1824.95	-1.73005e-05	-1.47798e-15	-6.64007e-201	4.55806e-27	-1.47798e-15
1825.6	-1.21721e-05	-4.32738e-15	-1.06711e-198	2.11369e-26	-4.32738e-15
1826.24	-3.30767e-06	-1.23831e-14	-1.66633e-196	9.57971e-26	-1.23831e-14
1826.88	3.48142e-06	-3.46326e-14	-2.52832e-194	4.24338e-25	-3.46326e-14
1827.52	5.90789e-06	-9.46646e-14	-3.7275e-192	1.83705e-24	-9.46646e-14
1828.17	4.97765e-06	-2.52895e-13	-5.33974e-190	7.77281e-24	-2.52895e-13
1828.81	2.06167e-06	-6.60299e-13	-7.43258e-188	3.21429e-23	-6.60299e-13
1829.45	-2.05024e-06	-1.68496e-12	-1.00525e-185	1.29909e-22	-1.68496e-12
1830.09	-5.94985e-06	-4.20232e-12	-1.32107e-183	5.13149e-22	-4.20232e-12
1830.74	-7.67014e-06	-1.02432e-11	-1.68693e-181	1.98106e-21	-1.02432e-11
1831.38	-6.59267e-06	-2.44024e-11	-2.09306e-179	7.47478e-21	-2.44024e-11
1832.02	-4.20003e-06	-5.6817e-11	-2.52338e-177	2.75644e-20	-5.6817e-11
1832.67	-2.42931e-06	-1.29292e-10	-2.95598e-175	9.93457e-20	-1.29292e-10
1833.31	-1.85416e-06	-2.87551e-10	-3.36463e-173	3.49943e-19	-2.87551e-10
1833.95	-1.37928e-06	-6.2504e-10	-3.72125e-171	1.20474e-18	-6.2504e-10
1834.59	5.74912e-07	-1.32785e-09	-3.99905e-169	4.0536e-18	-1.32785e-09
1835.24	4.47785e-06	-2.75701e-09	-4.17581e-167	1.33302e-17	-2.75701e-09
1835.88	9.35357e-06	-5.5947e-09	-4.23684e-165	4.2843e-17	-5.5947e-09
1836.52	1.35481e-05	-1.10959e-08	-4.17696e-163	1.34578e-16	-1.10959e-08
1837.17	1.61898e-05	-2.1508e-08	-4.00124e-161	4.13156e-16	-2.1508e-08
1837.81	1.76735e-05	-4.07461e-08	-3.7243e-159	1.23967e-15	-4.07461e-08
1838.45	1.90276e-05	-7.54431e-08	-3.36831e-157	3.63534e-15	-7.54431e-08
1839.09	1.9939e-05	-1.36522e-07	-2.96003e-155	1.04192e-14	-1.36522e-07
1839.74	1.85975e-05	-2.41454e-07	-2.52753e-153	2.91857e-14	-2.41454e-07
1840.38	1.30733e-05	-4.17364e-07	-2.09707e-151	7.99018e-14	-4.17364e-07
1841.02	3.44105e-06	-7.0509e-07	-1.69062e-149	2.13792e-13	-7.05091e-07
1841.67	-8.85387e-06	-1.16419e-06	-1.32433e-147	5.59082e-13	-1.16419e-06
1842.31	-2.24628e-05	-1.87867e-06	-1.00801e-145	1.42892e-12	-1.87867e-06
1842.95	-3.62458e-05	-2.96296e-06	-7.45499e-144	3.56936e-12	-2.96297e-06
1843.59	-4.7096e-05	-4.56721e-06	-5.35731e-142	8.71406e-12	-4.56722e-06
1844.24	-5.04459e-05	-6.88058e-06	-3.74079e-140	2.07922e-11	-6.8806e-06
1844.88	-4.53197e-05	-1.01309e-05	-2.53803e-138	4.84873e-11	-1.01309e-05
1845.52	-3.74989e-05	-1.45787e-05	-1.67319e-136	1.10511e-10	-1.45788e-05
1846.17	-3.5261e-05	-2.05039e-05	-1.07179e-134	2.46168e-10	-2.05041e-05
1846.81	-4.2078e-05	-2.8184e-05	-6.67105e-133	5.35928e-10	-2.81845e-05
1847.45	-5.46492e-05	-3.78631e-05	-4.03453e-131	1.14033e-09	-3.78642e-05
1848.09	-6.8385e-05	-4.97137e-05	-2.37087e-129	2.37139e-09	-4.9716e-05
1848.74	-8.2138e-05	-6.3794e-05	-1.35376e-127	4.81975e-09	-6.37988e-05
1849.38	-9.68023e-05	-8.00066e-05	-7.51086e-126	9.57403e-09	-8.00162e-05
1850.02	-0.00011196	-9.8064e-05	-4.04906e-124	1.85872e-08	-9.80825e-05
1850.66	-0.000125713	-0.000117469	-2.12098e-122	3.52681e-08	-0.000117505
1851.31	-0.000137813	-0.000137518	-1.07953e-120	6.54032e-08	-0.000137583
1851.95	-0.000150765	-0.000157326	-5.33887e-119	1.1854e-07	-0.000157444
1852.59	-0.00016684	-0.000175881	-2.56555e-117	2.09981e-07	-0.000176091
1853.24	-0.000184647	-0.00019212	-1.19792e-115	3.63533e-07	-0.000192484
1853.88	-0.000199772	-0.000205022	-5.43493e-114	6.15115e-07	-0.000205637
1854.52	-0.000208977	-0.000213695	-2.39593e-112	1.01723e-06	-0.000214713
1855.16	-0.000212402	-0.000217466	-1.0263e-110	1.6441e-06	-0.00021911
1855.81	-0.000212111	-0.000215936	-4.27156e-109	2.59709e-06	-0.000218533
1856.45	-0.000208745	-0.00020901	-1.7275e-107	4.00955e-06	-0.000213019
1857.09	-0.000200545	-0.000196892	-6.78836e-106	6.04996e-06	-0.000202941
1857.74	-0.00018509	-0.000180039	-2.59196e-104	8.92192e-06	-0.000188961
1858.38	-0.000161419	-0.000159098	-9.61632e-103	1.28592e-05	-0.000171957
1859.02	-0.00013117	-0.000134825	-3.46662e-101	1.81141e-05	-0.000152939
1859.66	-9.87034e-05	-0.000108005	-1.21428e-99	2.49384e-05	-0.000132943
1860.31	-6.83615e-05	-7.93876e-05	-4.13285e-98	3.3556e-05	-0.000112944
1860.95	-4.15379e-05	-4.96506e-05	-1.36677e-96	4.41287e-05	-9.37793e-05
1861.59	-1.63848e-05	-1.93849e-05	-4.39197e-95	5.67179e-05	-7.61028e-05
1862.24	9.31806e-06	1.08881e-05	-1.37132e-93	7.12472e-05	-6.03592e-05
1862.88	3.55633e-05	4.06831e-05	-4.1604e-92	8.74712e-05	-4.6788e-05
1863.52	6.06968e-05	6.95102e-05	-1.22644e-90	0.000104957	-3.54466e-05
1864.16	8.41674e-05	9.6839e-05	-3.51299e-89	0.000123085	-2.62461e-05
1864.81	0.000106959	0.000122081	-9.77739e-88	0.000141075	-1.89934e-05
1865.45	0.000130523	0.000144597	-2.64414e-86	0.000158031	-1.34335e-05
1866.09	0.000153736	0.000163729	-6.94807e-85	0.000173015	-9.28593e-06
1866.74	0.000172798	0.000178855	-1.77402e-83	0.000185128	-6.2735e-06
1867.38	0.000184415	0.000189461	-4.40121e-82	0.000193603	-4.14232e-06
1868.02	0.000188655	0.000195206	-1.06096e-80	0.000197879	-2.67317e-06
1868.66	0.000188617	0.000195982	-2.48511e-79	0.000197668	-1.686e-06
1869.31	0.000186789	0.000191945	-5.65597e-78	0.000192984	-1.03929e-06
1869.95	0.000183202	0.000183518	-1.25079e-76	0.000184144	-6.26134e-07
1870.59	0.000176231	0.000171359	-2.6877e-75	0.000171728	-3.68676e-07
1871.23	0.000164796	0.000156309	-5.61166e-74	0.000156521	-2.12164e-07
1871.88	0.000149232	0.00013931	-1.13846e-72	0.000139429	-1.1933e-07
1872.52	0.00013161	0.000121325	-2.24421e-71	0.00012139	-6.55953e-08
1873.16	0.000114651	0.000103256	-4.29858e-70	0.000103291	-3.52408e-08
1873.81	0.000100976	8.5881e-05	-8.00023e-69	8.58995e-05	-1.85041e-08
1874.45	9.10546e-05	6.98085e-05	-1.44676e-67	6.9818e-05	-9.49598e-09
1875.09	8.29355e-05	5.54569e-05	-2.54219e-66	5.54617e-05	-4.76277e-09
1875.73	7.37201e-05	4.3057e-05	-4.34045e-65	4.30593e-05	-2.33469e-09
1876.38	6.27453e-05	3.2672e-05	-7.20076e-64	3.26731e-05	-1.11853e-09
1877.02	5.13522e-05	2.423e-05	-1.16075e-62	2.42305e-05	-5.23738e-10
1877.66	4.0122e-05	1.75622e-05	-1.81809e-61	1.75624e-05	-2.39679e-10
1878.31	2.8019e-05	1.24409e-05	-2.767e-60	1.2441e-05	-1.072e-10
1878.95	1.55574e-05	8.61333e-06	-4.09184e-59	8.61337e-06	-4.68607e-11
1879.59	6.37311e-06	5.82827e-06	-5.87956e-58	5.82829e-06	-2.00207e-11
1880.23	3.31965e-06	3.85442e-06	-8.20896e-57	3.85443e-06	-8.36067e-12
1880.88	4.69831e-06	2.49133e-06	-1.11365e-55	2.49133e-06	-3.41474e-12
1881.52	6.10583e-06	1.57387e-06	-1.46799e-54	1.57387e-06	-1.36981e-12
1882.16	5.06118e-06	9.71872e-07	-1.88025e-53	9.71872e-07	-5.55362e-13
1882.81	1.63886e-06	5.86795e-07	-2.34005e-52	5.86796e-07	-2.68624e-13
1883.45	-2.82745e-06	3.46785e-07	-2.82977e-51	3.46785e-07	-2.48681e-13
1884.09	-6.39313e-06	2.01325e-07	-3.32502e-50	2.01326e-07	-4.69156e-13
1884.73	-6.44304e-06	1.16214e-07	-3.79623e-49	1.16215e-07	-1.10952e-12
1885.38	-1.7627e-06	6.92953e-08	-4.21142e-48	6.9298e-08	-2.67922e-12
1886.02	5.22646e-06	4.71288e-08	-4.53963e-47	4.71352e-08	-6.36414e-12
1886.66	9.89017e-06	4.26045e-08	-4.75476e-46	4.26193e-08	-1.47885e-11
1887.31	9.0098e-06	5.34301e-08	-4.83898e-45	5.34636e-08	-3.35904e-11
1887.95	3.0324e-06	8.13701e-08	-4.78515e-44	8.14446e-08	-7.45698e-11
1888.59	-4.91278e-06	1.32109e-07	-4.59784e-43	1.32271e-07	-1.61794e-10
1889.23	-1.08397e-05	2.15605e-07	-4.29268e-42	2.15948e-07	-3.4309e-10
1889.88	-1.15222e-05	3.46794e-07	-3.89421e-41	3.47505e-07	-7.11057e-10
1890.52	-6.66227e-06	5.46458e-07	-3.43263e-40	5.47898e-07	-1.44029e-09
1891.16	2.01052e-07	8.42041e-07	-2.94003e-39	8.44892e-07	-2.8513e-09
1891.81	3.56926e-06	1.26811e-06	-2.44677e-38	1.27363e-06	-5.51678e-09
1892.45	1.00602e-06	1.86612e-06	-1.97856e-37	1.87655e-06	-1.04322e-08
1893.09	-5.22369e-06	2.68302e-06	-1.55462e-36	2.7023e-06	-1.92805e-08
1893.73	-1.07762e-05	3.76845e-06	-1.1869e-35	3.80328e-06	-3.48263e-08
1894.38	-1.29916e-05	5.17009e-06	-8.80485e-35	5.23157e-06	-6.14816e-08
1895.02	-1.16538e-05	6.92716e-06	-6.34666e-34	7.03324e-06	-1.0608e-07
1895.66	-7.83573e-06	9.06231e-06	-4.44514e-33	9.24119e-06	-1.78883e-07
1896.3	-3.29573e-06	1.15724e-05	-3.02512e-32	1.18672e-05	-2.94817e-07
1896.95	-7.52419e-08	1.44194e-05	-2.0004e-31	1.48943e-05	-4.74883e-07
1897.59	2.76026e-07	1.75224e-05	-1.2853e-30	1.827e-05	-7.476e-07
1898.23	-2.44309e-06	2.07528e-05	-8.02439e-30	2.19031e-05	-1.15027e-06
1898.88	-5.50569e-06	2.39341e-05	-4.86783e-29	2.56639e-05	-1.72974e-06
1899.52	-4.62766e-06	2.6847e-05	-2.86929e-28	2.93892e-05	-2.5422e-06
1900.16	3.0967e-06	2.92412e-05	-1.64335e-27	3.28929e-05	-3.65165e-06
1900.8	1.57377e-05	3.08539e-05	-9.14541e-27	3.59803e-05	-5.12644e-06
1901.45	2.7916e-05	3.14322e-05	-4.9453e-26	3.8466e-05	-7.03382e-06
1902.09	3.59139e-05	3.07596e-05	-2.59835e-25	4.01919e-05	-9.43227e-06
1902.73	3.94257e-05	2.86818e-05	-1.32654e-24	4.10439e-05	-1.2362e-05
1903.38	3.91444e-05	2.51297e-05	-6.5805e-24	4.09644e-05	-1.58348e-05
1904.02	3.54724e-05	2.01354e-05	-3.17186e-23	3.9959e-05	-1.98237e-05
1904.66	2.99147e-05	1.38401e-05	-1.48555e-22	3.80953e-05	-2.42552e-05
1905.3	2.51534e-05	6.49076e-06	-6.76044e-22	3.54958e-05	-2.9005e-05
1905.95	2.09055e-05	-1.57489e-06	-2.98937e-21	3.23244e-05	-3.38993e-05
1906.59	1.3386e-05	-9.9524e-06	-1.2844e-20	2.87696e-05	-3.8722e-05
1907.23	-5.93863e-07	-1.82032e-05	-5.36216e-20	2.50257e-05	-4.32289e-05
1907.88	-1.83147e-05	-2.58912e-05	-2.17517e-19	2.12759e-05	-4.7167e-05
1908.52	-3.27952e-05	-3.262e-05	-8.57364e-19	1.76782e-05	-5.02981e-05
1909.16	-3.96322e-05	-3.8066e-05	-3.28362e-18	1.43561e-05	-5.24221e-05
1909.8	-4.08374e-05	-4.20039e-05	-1.22196e-17	1.13942e-05	-5.33981e-05
1910.45	-4.18346e-05	-4.43216e-05	-4.41853e-17	8.83852e-06	-5.31601e-05
1911.09	-4.58278e-05	-4.50236e-05	-1.55244e-16	6.70077e-06	-5.17243e-05
1911.73	-5.18632e-05	-4.42223e-05	-5.29992e-16	4.965e-06	-4.91873e-05
1912.38	-5.6968e-05	-4.21196e-05	-1.75808e-15	3.59552e-06	-4.57151e-05
1913.02	-5.85346e-05	-3.89807e-05	-5.66666e-15	2.5448e-06	-4.15255e-05
1913.66	-5.51026e-05	-3.51051e-05	-1.77472e-14	1.76033e-06	-3.68655e-05
1914.3	-4.6985e-05	-3.07969e-05	-5.40071e-14	1.1901e-06	-3.1987e-05
1914.95	-3.67149e-05	-2.6339e-05	-1.59694e-13	7.86364e-07	-2.71254e-05
1915.59	-2.76154e-05	-2.19738e-05	-4.58818e-13	5.07821e-07	-2.24816e-05
1916.23	-2.14225e-05	-1.78902e-05	-1.28089e-12	3.20514e-07	-1.82107e-05
1916.87	-1.7838e-05	-1.42193e-05	-3.47453e-12	1.97712e-07	-1.4417e-05
1917.52	-1.61691e-05	-1.10359e-05	-9.15797e-12	1.19197e-07	-1.11551e-05
1918.16	-1.65649e-05	-8.36548e-06	-2.34541e-11	7.02344e-08	-8.43569e-06
1918.8	-1.92116e-05	-6.19432e-06	-5.83653e-11	4.04465e-08	-6.23471e-06
1919.45	-2.27978e-05	-4.48098e-06	-1.41126e-10	2.27647e-08	-4.50361e-06
1920.09	-2.48799e-05	-3.16727e-06	-3.31571e-10	1.25225e-08	-3.17946e-06
1920.73	-2.34686e-05	-2.18782e-06	-7.56941e-10	6.73241e-09	-2.1938e-06
1921.37	-1.86829e-05	-1.47755e-06	-1.67905e-09	3.53751e-09	-1.47941e-06
1922.02	-1.26018e-05	-9.76853e-07	-3.61895e-09	1.81666e-09	-9.75051e-07
1922.66	-7.65395e-06	-6.34749e-07	-7.57911e-09	9.11799e-10	-6.28082e-07
1923.3	-5.56804e-06	-4.10391e-07	-1.5423e-08	4.47274e-10	-3.95416e-07
1923.95	-5.9119e-06	-2.7358e-07	-3.04957e-08	2.14435e-10	-2.43299e-07
1924.59	-6.85271e-06	-2.048e-07	-5.859e-08	1.00477e-10	-1.46311e-07
1925.23	-6.57998e-06	-1.95323e-07	-1.09377e-07	4.60138e-11	-8.59925e-08
1925.87	-4.54982e-06	-2.47776e-07	-1.984e-07	2.05948e-11	-4.93962e-08
1926.52	-2.18531e-06	-3.77408e-07	-3.49685e-07	9.009e-12	-2.77317e-08
1927.16	-1.55027e-06	-6.14077e-07	-5.98864e-07	3.85162e-12	-1.52162e-08
1927.8	-3.31526e-06	-1.0047e-06	-9.96543e-07	1.60939e-12	-8.15994e-09
1928.45	-5.86352e-06	-1.61559e-06	-1.61131e-06	6.57242e-13	-4.27677e-09
1929.09	-6.87791e-06	-2.53371e-06	-2.53152e-06	2.62325e-13	-2.19075e-09
1929.73	-6.14985e-06	-3.86564e-06	-3.86454e-06	1.0233e-13	-1.09678e-09
1930.37	-6.40624e-06	-5.73288e-06	-5.73234e-06	3.90134e-14	-5.36655e-10
1931.02	-1.03517e-05	-8.2622e-06	-8.26195e-06	1.4537e-14	-2.56637e-10
1931.66	-1.77999e-05	-1.15705e-05	-1.15704e-05	5.29399e-15	-1.19948e-10
1932.3	-2.56961e-05	-1.57447e-05	-1.57446e-05	1.88426e-15	-5.47917e-11
1932.95	-3.10826e-05	-2.08177e-05	-2.08177e-05	6.55464e-16	-2.44616e-11
1933.59	-3.31396e-05	-2.67454e-05	-2.67454e-05	2.22846e-16	-1.06735e-11
1934.23	-3.36927e-05	-3.33874e-05	-3.33874e-05	7.40475e-17	-4.55171e-12
1934.87	-3.61691e-05	-4.04979e-05	-4.04979e-05	2.40472e-17	-1.89711e-12
1935.52	-4.32213e-05	-4.77308e-05	-4.77308e-05	7.6325e-18	-7.72784e-13
1936.16	-5.36794e-05	-5.46615e-05	-5.46615e-05	2.36765e-18	-3.07662e-13
1936.8	-6.32148e-05	-6.08248e-05	-6.08248e-05	7.17825e-19	-1.19712e-13
1937.44	-6.8795e-05	-6.57653e-05	-6.57653e-05	2.127e-19	-4.55251e-14
1938.09	-7.10533e-05	-6.90922e-05	-6.90922e-05	6.1598e-20	-1.69205e-14
1938.73	-7.14427e-05	-7.05307e-05	-7.05307e-05	1.74347e-20	-6.14644e-15
1939.37	-6.9084e-05	-6.9959e-05	-6.9959e-05	4.82291e-21	-2.18214e-15
1940.02	-6.32322e-05	-6.74257e-05	-6.74257e-05	1.30393e-21	-7.57167e-16
1940.66	-5.60404e-05	-6.31429e-05	-6.31429e-05	3.44547e-22	-2.56773e-16
1941.3	-5.07198e-05	-5.74565e-05	-5.74565e-05	8.89797e-23	-8.51051e-17
1941.94	-4.78219e-05	-5.08009e-05	-5.08009e-05	2.24586e-23	-2.75684e-17
1942.59	-4.53723e-05	-4.36435e-05	-4.36435e-05	5.54017e-24	-8.72801e-18
1943.23	-4.17839e-05	-3.64321e-05	-3.64321e-05	1.33571e-24	-2.70065e-18
1943.87	-3.66843e-05	-2.95506e-05	-2.95506e-05	3.14739e-25	-8.16714e-19
1944.52	-3.01778e-05	-2.32897e-05	-2.32897e-05	7.24832e-26	-2.41391e-19
1945.16	-2.26295e-05	-1.78352e-05	-1.78352e-05	1.63145e-26	-6.97301e-20
1945.8	-1.49781e-05	-1.32712e-05	-1.32712e-05	3.58887e-27	-1.96865e-20
1946.44	-7.70061e-06	-9.59526e-06	-9.59526e-06	7.71599e-28	-5.43208e-21
1947.09	-6.0319e-07	-6.74094e-06	-6.74094e-06	1.62134e-28	-1.46492e-21
1947.73	6.09803e-06	-4.60152e-06	-4.60152e-06	3.3297e-29	-3.86107e-22
1948.37	1.10247e-05	-3.0521e-06	-3.0521e-06	6.68322e-30	-9.94608e-23
1949.02	1.27388e-05	-1.96704e-06	-1.96704e-06	1.31104e-30	-2.50406e-23
1949.66	1.07188e-05	-1.23181e-06	-1.23181e-06	2.51358e-31	-6.1615e-24
1950.3	5.63524e-06	-7.49531e-07	-7.49531e-07	4.70999e-32	-1.48176e-24
1950.94	-8.28057e-07	-4.43152e-07	-4.43152e-07	8.62573e-33	-3.4827e-25
1951.59	-6.30183e-06	-2.54585e-07	-2.54585e-07	1.5439e-33	-8.00028e-26
1952.23	-8.69993e-06	-1.42112e-07	-1.42112e-07	2.70081e-34	-1.79615e-26
1952.87	-7.69454e-06	-7.70801e-08	-7.70801e-08	4.6176e-35	-3.9412e-27
1953.52	-4.99186e-06	-4.0623e-08	-4.0623e-08	7.71592e-36	-8.45208e-28
1954.16	-2.2981e-06	-2.08026e-08	-2.08026e-08	1.26011e-36	-1.77153e-28
1954.8	3.64398e-07	-1.0351e-08	-1.0351e-08	2.0113e-37	-3.62895e-29
1955.44	3.77046e-06	-5.00449e-09	-5.00449e-09	3.13758e-38	-7.2657e-30
1956.09	7.76362e-06	-2.35102e-09	-2.35102e-09	4.78368e-39	-1.4231e-30
1956.73	1.06898e-05	-1.07317e-09	-1.07317e-09	7.12817e-40	-2.80044e-31
1957.37	1.14166e-05	-4.75989e-10	-4.75989e-10	1.03811e-40	-9.56427e-32
1958.02	1.13744e-05	-2.05136e-10	-2.05136e-10	1.4776e-41	-2.49782e-31
1958.66	1.30592e-05	-8.59023e-11	-8.59023e-11	2.0555e-42	-1.26288e-30
1959.3	1.71787e-05	-3.49529e-11	-3.49529e-11	2.79466e-43	-6.46525e-30
1959.94	2.2012e-05	-1.38191e-11	-1.38191e-11	3.71355e-44	-3.23922e-29
1960.59	2.5726e-05	-5.30872e-12	-5.30872e-12	4.82279e-45	-1.5864e-28
1961.23	2.78365e-05	-1.98161e-12	-1.98161e-12	6.12148e-46	-7.59427e-28
1961.87	2.84404e-05	-7.18725e-13	-7.18725e-13	7.59387e-47	-3.55351e-27
1962.51	2.76718e-05	-2.53294e-13	-2.53294e-13	9.20702e-48	-1.62528e-26
1963.16	2.55752e-05	-8.67365e-14	-8.67365e-14	1.091e-48	-7.26604e-26
1963.8	2.20689e-05	-2.886e-14	-2.886e-14	1.2635e-49	-3.17516e-25
1964.44	1.73017e-05	-9.33055e-15	-9.33055e-15	1.43014e-50	-1.35623e-24
1965.09	1.25179e-05	-2.93113e-15	-2.93113e-15	1.58209e-51	-5.66239e-24
1965.73	1.00197e-05	-8.94703e-16	-8.94703e-16	1.71053e-52	-2.31082e-23
1966.37	1.02392e-05	-2.65362e-16	-2.65362e-16	1.80751e-53	-9.21785e-23
1967.01	1.04943e-05	-7.64748e-17	-7.64745e-17	1.86836e-54	-3.59412e-22
1967.66	7.23837e-06	-2.1416e-17	-2.14146e-17	2.22603e-55	-1.36979e-21
1968.3	4.8634e-07	-5.83177e-18	-5.82667e-18	6.99064e-55	-5.1029e-21
1968.94	-6.58785e-06	-1.55903e-18	-1.54045e-18	1.30364e-53	-1.85813e-20
1969.59	-1.13765e-05	-4.61858e-19	-3.95722e-19	2.4026e-52	-6.61358e-20
1970.23	-1.37381e-05	-3.28864e-19	-9.87757e-20	4.26152e-51	-2.30088e-19
1970.87	-1.48871e-05	-8.06399e-19	-2.39567e-20	7.27357e-50	-7.82442e-19
1971.51	-1.50619e-05	-2.60646e-18	-5.64572e-21	1.19462e-48	-2.60081e-18
1972.16	-1.35547e-05	-8.45143e-18	-1.29279e-21	1.88806e-47	-8.45014e-18
1972.8	-9.01698e-06	-2.68363e-17	-2.87644e-22	2.87143e-46	-2.6836e-17
1973.44	-4.72758e-07	-8.33052e-17	-6.21868e-23	4.20225e-45	-8.33051e-17
1974.09	1.07443e-05	-2.52769e-16	-1.30634e-23	5.91787e-44	-2.52769e-16
1974.73	2.08196e-05	-7.49679e-16	-2.66645e-24	8.01953e-43	-7.49679e-16
1975.37	2.60127e-05	-2.17333e-15	-5.28841e-25	1.04576e-41	-2.17333e-15
1976.01	2.65399e-05	-6.1585e-15	-1.01914e-25	1.31225e-40	-6.1585e-15
1976.66	2.56421e-05	-1.70578e-14	-1.90836e-26	1.58452e-39	-1.70578e-14
1977.3	2.50627e-05	-4.61818e-14	-3.47217e-27	1.84112e-38	-4.61818e-14
1977.94	2.28123e-05	-1.22213e-13	-6.13846e-28	2.05857e-37	-1.22213e-13
1978.59	1.67826e-05	-3.16127e-13	-1.05447e-28	2.21487e-36	-3.16127e-13
1979.23	9.0148e-06	-7.99294e-13	-1.76005e-29	2.29315e-35	-7.99294e-13
1979.87	4.35937e-06	-1.97538e-12	-2.85453e-30	2.28463e-34	-1.97538e-12
1980.51	4.71616e-06	-4.77191e-12	-4.49841e-31	2.19027e-33	-4.77191e-12
1981.16	6.71002e-06	-1.12676e-11	-6.88811e-32	2.0206e-32	-1.12676e-11
1981.8	6.07923e-06	-2.6006e-11	-1.02484e-32	1.79376e-31	-2.6006e-11
1982.44	2.39909e-06	-5.86695e-11	-1.4816e-33	1.53231e-30	-5.86695e-11
1983.08	-1.29058e-06	-1.29375e-10	-2.08124e-34	1.25959e-29	-1.29375e-10
1983.73	-3.08245e-06	-2.78861e-10	-2.84073e-35	9.96353e-29	-2.78861e-10
1984.37	-3.87058e-06	-5.87523e-10	-3.76751e-36	7.58396e-28	-5.87523e-10
1985.01	-5.04082e-06	-1.20993e-09	-4.85506e-37	5.55493e-27	-1.20993e-09
1985.66	-5.87789e-06	-2.43553e-09	-6.07928e-38	3.91527e-26	-2.43553e-09
1986.3	-4.57879e-06	-4.79211e-09	-7.39649e-39	2.65549e-25	-4.79211e-09
1986.94	-1.09137e-06	-9.21636e-09	-8.74411e-40	1.73311e-24	-9.21636e-09
1987.58	2.35664e-06	-1.73257e-08	-1.00444e-40	1.08845e-23	-1.73257e-08
1988.23	3.36614e-06	-3.18362e-08	-1.1211e-41	6.57798e-23	-3.18362e-08
1988.87	1.67636e-06	-5.71808e-08	-1.21586e-42	3.82538e-22	-5.71808e-08
1989.51	-1.06615e-06	-1.00387e-07	-1.28127e-43	2.14071e-21	-1.00387e-07
1990.16	-3.6544e-06	-1.72268e-07	-1.31194e-44	1.15276e-20	-1.72268e-07
1990.8	-6.98247e-06	-2.88956e-07	-1.30528e-45	5.97342e-20	-2.88956e-07
1991.44	-1.1937e-05	-4.73758e-07	-1.26186e-46	2.97855e-19	-4.73758e-07
1992.08	-1.71396e-05	-7.59244e-07	-1.18531e-47	1.42918e-18	-7.59244e-07
1992.73	-1.99677e-05	-1.18934e-06	-1.08186e-48	6.59888e-18	-1.18934e-06
1993.37	-1.97508e-05	-1.82107e-06	-9.59461e-50	2.93192e-17	-1.82107e-06
1994.01	-1.85825e-05	-2.72551e-06	-8.26798e-51	1.25353e-16	-2.72551e-06
1994.66	-1.8534e-05	-3.9872e-06	-6.9229e-52	5.15723e-16	-3.9872e-06
1995.3	-1.89572e-05	-5.70147e-06	-5.6324e-53	2.04173e-15	-5.70147e-06
1995.94	-1.77883e-05	-7.96902e-06	-4.45262e-54	7.77824e-15	-7.96902e-06
1996.58	-1.5288e-05	-1.08874e-05	-3.42022e-55	2.85144e-14	-1.08874e-05
1997.23	-1.50848e-05	-1.45391e-05	-2.55275e-56	1.00588e-13	-1.45391e-05
1997.87	-2.05388e-05	-1.89781e-05	-1.85131e-57	3.4145e-13	-1.89781e-05
1998.51	-3.10542e-05	-2.42141e-05	-1.30457e-58	1.11535e-12	-2.42141e-05
1999.16	-4.18997e-05	-3.01982e-05	-8.93249e-60	3.50584e-12	-3.01982e-05
1999.8	-4.81282e-05	-3.68123e-05	-5.94284e-61	1.06041e-11	-3.68123e-05
2000.44	-4.93149e-05	-4.38635e-05	-3.84177e-62	3.08642e-11	-4.38636e-05
2001.08	-5.02284e-05	-5.10874e-05	-2.41316e-63	8.64445e-11	-5.10874e-05
2001.73	-5.61286e-05	-5.81596e-05	-1.47284e-64	2.3298e-10	-5.81598e-05
2002.37	-6.67624e-05	-6.47183e-05	-8.73461e-66	6.04229e-10	-6.47189e-05
2003.01	-7.64597e-05	-7.0393e-05	-5.03324e-67	1.50794e-09	-7.03945e-05
2003.65	-7.99381e-05	-7.48382e-05	-2.81817e-68	3.6213e-09	-7.48419e-05
2004.3	-7.79353e-05	-7.77684e-05	-1.53322e-69	8.36848e-09	-7.77767e-05
2004.94	-7.51601e-05	-7.89862e-05	-8.1051e-71	1.86092e-08	-7.90048e-05
2005.58	-7.44287e-05	-7.84037e-05	-4.16321e-72	3.98208e-08	-7.84435e-05
2006.23	-7.44969e-05	-7.60485e-05	-2.07785e-73	8.19958e-08	-7.61305e-05
2006.87	-7.29209e-05	-7.20579e-05	-1.00767e-74	1.6247e-07	-7.22204e-05
2007.51	-6.86502e-05	-6.66571e-05	-4.7483e-76	3.09781e-07	-6.69669e-05
2008.15	-6.19232e-05	-6.01275e-05	-2.17407e-77	5.68376e-07	-6.06959e-05
2008.8	-5.3418e-05	-5.27686e-05	-9.67224e-79	1.0035e-06	-5.37721e-05
2009.44	-4.4036e-05	-4.48595e-05	-4.18116e-80	1.7049e-06	-4.65644e-05
2010.08	-3.42391e-05	-3.66267e-05	-1.75623e-81	2.78728e-06	-3.9414e-05
2010.73	-2.29025e-05	-2.82247e-05	-7.16778e-83	4.38492e-06	-3.26096e-05
2011.37	-8.97544e-06	-1.97337e-05	-2.84252e-84	6.63809e-06	-2.63718e-05
2012.01	6.29028e-06	-1.11765e-05	-1.09532e-85	9.66995e-06	-2.08465e-05
2012.65	1.98474e-05	-2.55218e-06	-4.10101e-87	1.35552e-05	-1.61074e-05
2013.3	3.02058e-05	6.11955e-06	-1.49197e-88	1.82846e-05	-1.21651e-05
2013.94	3.75293e-05	1.47532e-05	-5.27406e-90	2.37338e-05	-8.9806e-06
2014.58	4.19522e-05	2.31645e-05	-1.81154e-91	2.96448e-05	-6.48029e-06
2015.23	4.32955e-05	3.10605e-05	-6.04596e-93	3.56312e-05	-4.5707e-06
2015.87	4.30121e-05	3.80596e-05	-1.96065e-94	4.12108e-05	-3.15115e-06
2016.51	4.368e-05	4.37426e-05	-6.17805e-96	4.58661e-05	-2.12352e-06
2017.15	4.56493e-05	4.77229e-05	-1.89156e-97	4.91216e-05	-1.39875e-06
2017.8	4.67147e-05	4.97231e-05	-5.62735e-99	5.06237e-05	-9.00584e-07
2018.44	4.47899e-05	4.96368e-05	-1.62669e-100	5.02036e-05	-5.66771e-07
2019.08	4.04041e-05	4.75602e-05	-4.56901e-102	4.79088e-05	-3.4865e-07
2019.73	3.48833e-05	4.37847e-05	-1.24697e-103	4.39943e-05	-2.09638e-07
2020.37	2.88161e-05	3.87524e-05	-3.30679e-105	3.88756e-05	-1.23211e-07
2021.01	2.27242e-05	3.29858e-05	-8.52068e-107	3.30566e-05	-7.07831e-08
2021.65	1.75165e-05	2.70085e-05	-2.13333e-108	2.70482e-05	-3.97476e-08
2022.3	1.35879e-05	2.12752e-05	-5.1899e-110	2.1297e-05	-2.18177e-08
2022.94	9.98466e-06	1.61244e-05	-1.2268e-111	1.61361e-05	-1.17092e-08
2023.58	5.85003e-06	1.17585e-05	-2.81779e-113	1.17647e-05	-6.15331e-09
2024.23	1.32555e-06	8.25074e-06	-6.28867e-115	8.25393e-06	-3.19486e-09
2024.87	-2.59038e-06	5.57067e-06	-1.36372e-116	5.57239e-06	-1.72415e-09
2025.51	-5.30173e-06	3.61891e-06	-2.87348e-118	3.62011e-06	-1.20129e-09
2026.15	-7.24061e-06	2.26153e-06	-5.88312e-120	2.26309e-06	-1.55997e-09
2026.8	-9.83753e-06	1.35807e-06	-1.17037e-121	1.36139e-06	-3.32341e-09
2027.44	-1.40164e-05	7.80031e-07	-2.26234e-123	7.88067e-07	-8.03625e-09
2028.08	-1.87266e-05	4.19764e-07	-4.24919e-125	4.38979e-07	-1.92146e-08
2028.72	-2.16287e-05	1.91169e-07	-7.75483e-127	2.35301e-07	-4.41316e-08
2029.37	-2.20968e-05	2.45214e-08	-1.37516e-128	1.21368e-07	-9.68466e-08
2030.01	-2.17477e-05	-1.42626e-07	-2.36948e-130	6.02399e-08	-2.02866e-07
2030.65	-2.16021e-05	-3.76779e-07	-3.96706e-132	2.87716e-08	-4.05551e-07
2031.3	-2.05946e-05	-7.60483e-07	-6.45358e-134	1.32235e-08	-7.73707e-07
2031.94	-1.76225e-05	-1.40279e-06	-1.02012e-135	5.84858e-09	-1.40864e-06
2032.58	-1.4839e-05	-2.44497e-06	-1.5668e-137	2.49015e-09	-2.44746e-06
2033.22	-1.56564e-05	-4.05707e-06	-2.33828e-139	1.0236e-09	-4.05809e-06
2033.87	-1.98661e-05	-6.42085e-06	-3.39074e-141	4.15866e-10	-6.42126e-06
2034.51	-2.23571e-05	-9.6962e-06	-4.77759e-143	1.9667e-10	-9.6964e-06
2035.15	-1.82491e-05	-1.39729e-05	-6.54094e-145	1.87784e-10	-1.39731e-05
2035.8	-9.26324e-06	-1.92157e-05	-8.70138e-147	3.95564e-10	-1.92161e-05
2036.44	-3.42381e-06	-2.52181e-05	-1.12474e-148	1.02738e-09	-2.52191e-05
2037.08	-8.1441e-06	-3.15828e-05	-1.41265e-150	2.6465e-09	-3.15854e-05
2037.72	-2.3357e-05	-3.7745e-05	-1.72398e-152	6.53795e-09	-3.77515e-05
2038.37	-4.16046e-05	-4.30446e-05	-2.0443e-154	1.54231e-08	-4.306e-05
2039.01	-5.43707e-05	-4.68364e-05	-2.35546e-156	3.47236e-08	-4.68711e-05
2039.65	-5.81388e-05	-4.86141e-05	-2.63708e-158	7.46062e-08	-4.86887e-05
2040.3	-5.56133e-05	-4.81132e-05	-2.86871e-160	1.52974e-07	-4.82661e-05
2040.94	-5.16519e-05	-4.5362e-05	-3.03226e-162	2.99331e-07	-4.56613e-05
2041.58	-4.80579e-05	-4.06647e-05	-3.11432e-164	5.58956e-07	-4.12236e-05
2042.22	-4.24617e-05	-3.45208e-05	-3.10797e-166	9.96081e-07	-3.55169e-05
2042.87	-3.19726e-05	-2.75083e-05	-3.01375e-168	1.69396e-06	-2.92022e-05
2043.51	-1.77678e-05	-2.01641e-05	-2.83957e-170	2.74919e-06	-2.29133e-05
2044.15	-4.37723e-06	-1.28995e-05	-2.59966e-172	4.25791e-06	-1.71574e-05
2044.8	4.78683e-06	-5.96716e-06	-2.31257e-174	6.29332e-06	-1.22605e-05
2045.44	1.01639e-05	5.15841e-07	-1.9989e-176	8.87677e-06	-8.36093e-06
2046.08	1.41756e-05	6.50755e-06	-1.67882e-178	1.19487e-05	-5.44118e-06
2046.72	1.85949e-05	1.19697e-05	-1.37004e-180	1.5349e-05	-3.37927e-06
2047.37	2.29155e-05	1.68133e-05	-1.08637e-182	1.88161e-05	-2.00284e-06
2048.01	2.61463e-05	2.08798e-05	-8.37031e-185	2.20126e-05	-1.13281e-06
2048.65	2.75199e-05	2.39642e-05	-6.26643e-187	2.45757e-05	-6.11454e-07
2049.29	2.71556e-05	2.58687e-05	-4.55844e-189	2.61836e-05	-3.14964e-07
2049.94	2.56718e-05	2.64675e-05	-3.22202e-191	2.66223e-05	-1.54828e-07
2050.58	2.34113e-05	2.57591e-05	-2.21287e-193	2.58318e-05	-7.26321e-08
2051.22	2.02027e-05	2.38871e-05	-1.47673e-195	2.39196e-05	-3.25162e-08
2051.87	1.59939e-05	2.11232e-05	-9.57553e-198	2.11371e-05	-1.38919e-08
2052.51	1.15597e-05	1.78193e-05	-6.03311e-200	1.78249e-05	-5.66392e-09
2053.15	8.1668e-06	1.43428e-05	-3.69348e-202	1.43451e-05	-2.20376e-09
2053.79	6.20266e-06	1.10163e-05	-2.19709e-204	1.10171e-05	-8.18279e-10
2054.44	4.29638e-06	8.07439e-06	-1.26991e-206	8.07468e-06	-2.89955e-10
2055.08	2.79873e-07	5.64764e-06	-7.13213e-209	5.64774e-06	-9.80509e-11
2055.72	-6.5472e-06	3.76974e-06	-3.89206e-211	3.76977e-06	-3.1642e-11
2056.37	-1.45308e-05	2.4013e-06	-2.06375e-213	2.40131e-06	-9.74469e-12
2057.01	-1.91856e-05	1.45972e-06	-1.06329e-215	1.45973e-06	-2.86394e-12
2057.65	-1.67416e-05	8.46811e-07	-5.32306e-218	8.46812e-07	-8.03251e-13
2058.29	-7.66068e-06	4.68807e-07	-2.58934e-220	4.68807e-07	-2.14996e-13
2058.94	2.67035e-06	2.47681e-07	-1.22386e-222	2.47681e-07	-5.49162e-14
2059.58	8.984e-06	1.24877e-07	-5.62073e-225	1.24877e-07	-1.33864e-14
2060.22	1.0796e-05	6.00848e-08	-2.50824e-227	6.00848e-08	-3.11398e-15
2060.87	1.096e-05	2.75891e-08	-1.08758e-229	2.75891e-08	-6.91292e-16
2061.51	1.11374e-05	1.20894e-08	-4.58218e-232	1.20894e-08	-1.46453e-16
2062.15	1.0561e-05	5.05545e-09	-1.87585e-234	5.05545e-09	-2.96092e-17
2062.79	8.44089e-06	2.01747e-09	-7.46176e-237	2.01747e-09	-5.71277e-18
2063.44	6.11086e-06	7.6833e-10	-2.88404e-239	7.6833e-10	-1.05186e-18
2064.08	5.72413e-06	2.79241e-10	-1.08312e-241	2.79241e-10	-1.84825e-19
2064.72	7.99601e-06	9.68505e-11	-3.95248e-244	9.68505e-11	-3.09925e-20
2065.37	1.14066e-05	3.20565e-11	-1.40145e-246	3.20565e-11	-4.95955e-21
2066.01	1.36314e-05	1.01256e-11	-4.82841e-249	1.01256e-11	-7.57391e-22
2066.65	1.283e-05	3.05225e-12	-1.61639e-251	3.05225e-12	-1.1038e-22
2067.29	8.77912e-06	8.78031e-13	-5.25781e-254	8.78031e-13	-1.53515e-23
2067.94	3.52015e-06	2.41041e-13	-1.66181e-256	2.41041e-13	-2.03753e-24
2068.58	1.02431e-06	6.31485e-14	-5.10355e-259	6.31485e-14	-2.58076e-25
2069.22	4.38362e-06	1.5788e-14	-1.52293e-261	1.5788e-14	-3.11949e-26
2069.86	1.17802e-05	3.76689e-15	-4.41576e-264	3.76689e-15	-3.59842e-27
2070.51	1.61211e-05	8.5769e-16	-1.24408e-266	8.5769e-16	-3.96123e-28
2071.15	1.19302e-05	1.86367e-16	-3.40569e-269	1.86367e-16	-4.16142e-29
2071.79	1.778e-06	3.86455e-17	-9.05899e-272	3.86455e-17	-4.17199e-30
2072.44	-6.47509e-06	7.64753e-18	-2.34137e-274	7.64753e-18	-3.99151e-31
2073.08	-8.5077e-06	1.44423e-18	-5.88002e-277	1.44423e-18	-3.64437e-32
2073.72	-7.61294e-06	2.6028e-19	-1.43484e-279	2.6028e-19	-3.17541e-33
2074.36	-8.99127e-06	4.47648e-20	-3.40207e-282	4.47648e-20	-2.64039e-34
2075.01	-1.35218e-05	7.34726e-21	-7.83792e-285	7.34726e-21	-2.09521e-35
2075.65	-1.79412e-05	1.15081e-21	-1.75459e-287	1.15081e-21	-1.58665e-36
2076.29	-1.99918e-05	1.72019e-22	-3.8165e-290	1.72019e-22	-1.14663e-37
2076.94	-2.00387e-05	2.45381e-23	-8.06626e-293	2.45381e-23	-7.90785e-39
2077.58	-1.8134e-05	3.34037e-24	-1.65652e-295	3.34037e-24	-5.20457e-40
2078.22	-1.22063e-05	4.33952e-25	-3.30549e-298	4.33952e-25	-3.26891e-41
2078.86	-1.5926e-06	5.37996e-26	-6.40903e-301	5.37996e-26	-1.95935e-42
2079.51	1.10101e-05	6.36515e-27	-1.20744e-303	6.36515e-27	-1.12076e-43
2080.15	2.21747e-05	7.1867e-28	-2.21032e-306	7.1867e-28	-6.11797e-45
2080.79	3.10741e-05	7.74359e-29	--	7.74359e-29	-3.18707e-46
2081.44	3.76264e-05	7.96245e-30	--	7.96245e-30	-1.58441e-47
2082.08	3.88142e-05	7.81345e-31	--	7.81345e-31	-7.51685e-49
2082.72	3.1404e-05	7.31695e-32	--	7.31695e-32	-3.40326e-50
2083.36	1.67295e-05	6.53897e-33	--	6.53897e-33	-1.47043e-51
2084.01	8.70402e-07	5.57673e-34	--	5.57673e-34	-6.06301e-53
2084.65	-1.17624e-05	4.53881e-35	0	4.53881e-35	-2.38574e-54
2085.29	-2.12882e-05	3.5253e-36	0	3.5253e-36	-8.95876e-56
2085.94	-2.89957e-05	2.61301e-37	0	2.61301e-37	-3.21044e-57
2086.58	-3.35514e-05	1.84832e-38	0	1.84832e-38	-1.09793e-58
2087.22	-3.23474e-05	1.24769e-39	0	1.24769e-39	-3.58323e-60
2087.86	-2.51602e-05	8.03761e-41	0	8.03761e-41	-1.11601e-61
2088.51	-1.45825e-05	4.94127e-42	0	4.94127e-42	-3.31703e-63
2089.15	-3.78817e-06	2.89896e-43	0	2.89896e-43	-9.4086e-65
2089.79	4.80137e-06	1.62307e-44	0	1.62307e-44	-2.54678e-66
2090.43	1.03219e-05	8.67209e-46	0	8.67209e-46	-6.57885e-68
2091.08	1.37794e-05	4.42183e-47	0	4.42183e-47	-1.62181e-69
2091.72	1.75208e-05	2.15165e-48	0	2.15165e-48	-3.81541e-71
2092.36	2.22092e-05	9.99155e-50	0	9.99155e-50	-8.56594e-73
2093.01	2.50062e-05	4.42778e-51	0	4.42778e-51	-1.83527e-74
2093.65	2.21938e-05	1.87254e-52	0	1.87254e-52	-3.75246e-76
2094.29	1.4845e-05	7.55729e-54	0	7.55729e-54	-7.3219e-78
2094.93	7.98913e-06	2.91068e-55	0	2.91068e-55	-1.3634e-79
2095.58	5.06087e-06	1.06983e-56	0	1.06983e-56	-2.42278e-81
2096.22	5.08429e-06	3.75253e-58	0	3.75253e-58	-4.10863e-83
2096.86	5.53371e-06	1.25611e-59	0	1.25611e-59	-6.64923e-85
2097.51	5.24691e-06	4.01255e-61	0	4.01255e-61	-1.02692e-86
2098.15	4.90942e-06	1.22322e-62	0	1.22322e-62	-1.51354e-88
2098.79	5.50478e-06	3.55863e-64	0	3.55863e-64	-2.12884e-90
2099.43	7.03307e-06	9.87989e-66	0	9.87989e-66	-2.85749e-92
2100.08	7.97444e-06	2.61766e-67	0	2.61766e-67	-3.6603e-94
2100.72	6.74944e-06	6.61858e-69	0	6.61858e-69	-4.47446e-96
2101.36	4.6769e-06	1.59701e-70	0	1.59701e-70	-5.21982e-98
2102.01	4.06658e-06	3.67742e-72	0	3.67742e-72	-5.81116e-100
2102.65	4.62798e-06	8.08109e-74	0	8.08109e-74	-6.17392e-102
2103.29	3.61191e-06	1.69468e-75	0	1.69468e-75	-6.25967e-104
2103.93	3.33003e-07	3.39155e-77	0	3.39155e-77	-6.05666e-106
2104.58	-2.82448e-06	6.47739e-79	0	6.47739e-79	-5.5925e-108
2105.22	-4.25114e-06	1.18057e-80	0	1.18057e-80	-4.92801e-110
2105.86	-4.89312e-06	2.05342e-82	0	2.05342e-82	-4.14408e-112
2106.51	-5.94241e-06	3.40843e-84	0	3.40843e-84	-3.32564e-114
2107.15	-6.67625e-06	5.39911e-86	0	5.39911e-86	-2.54692e-116
2107.79	-6.18557e-06	8.16171e-88	0	8.16171e-88	-1.86143e-118
2108.43	-5.00673e-06	1.17742e-89	0	1.17742e-89	-1.29828e-120
2109.08	-4.45839e-06	1.62097e-91	0	1.62097e-91	-8.6414e-123
2109.72	-5.25574e-06	2.12965e-93	0	2.12965e-93	-5.48896e-125
2110.36	-6.69832e-06	2.67015e-95	0	2.67015e-95	-3.32727e-127
2111.01	-6.94576e-06	3.19486e-97	0	3.19486e-97	-1.92476e-129
2111.65	-3.9565e-06	3.64806e-99	0	3.64806e-99	-1.06257e-131
2112.29	2.19503e-06	3.97523e-101	0	3.97523e-101	-5.59797e-134
2112.93	8.17851e-06	4.13385e-103	0	4.13385e-103	-2.81446e-136
2113.58	9.19587e-06	4.1024e-105	0	4.1024e-105	-1.35036e-138
2114.22	3.13123e-06	3.8852e-107	0	3.8852e-107	-6.18297e-141
2114.86	-7.08723e-06	3.5114e-109	0	3.5114e-109	-2.70169e-143
2115.5	-1.55735e-05	3.02858e-111	0	3.02858e-111	-1.1266e-145
2116.15	-1.80955e-05	2.49281e-113	0	2.49281e-113	-4.48331e-148
2116.79	-1.42955e-05	1.95808e-115	0	1.95808e-115	-1.70278e-150
2117.43	-7.20583e-06	1.46779e-117	0	1.46779e-117	-6.17441e-153
2118.08	-7.752e-07	1.05e-119	0	1.05e-119	-2.14158e-155
2118.72	2.00882e-06	7.16812e-122	0	7.16812e-122	-7.1789e-158
2119.36	9.37712e-07	4.66996e-124	0	4.66996e-124	-2.45617e-160

## Sheet: Fig.2B
time	Hox	Hred'	Hred*	Hsred*
0	0.000130666	-1.10174e-05	-0.000116686	0.000298875
5.5	-0.02083	0.01645	0.00305	0.000161932
11	-0.06855	0.05654	0.00818	0.00135
16.5	-0.07473	0.06158	0.00884	0.00224
22	-0.07807	0.06298	0.0083	0.00366
27.5	-0.08002	0.06411	0.00931	0.00469
33	-0.08172	0.06436	0.01006	0.005
38.5	-0.08303	0.06657	0.01102	0.00589
44	-0.08416	0.06625	0.01124	0.00672
49.5	-0.08569	0.06584	0.01146	0.00709
55	-0.08694	0.06631	0.01144	0.00794
60.5	-0.08761	0.06659	0.01218	0.0078
66	-0.08899	0.06693	0.01234	0.0084
71.5	-0.08976	0.06671	0.01257	0.00864
77	-0.09109	0.06739	0.01318	0.00949
82.5	-0.09258	0.06716	0.01316	0.00961
88	-0.09343	0.0677	0.01351	0.0102
93.5	-0.0948	0.06837	0.01423	0.01026
99	-0.09575	0.06868	0.01406	0.0107
104.5	-0.09663	0.06906	0.01418	0.01088
110	-0.09747	0.06835	0.01436	0.0107
115.5	-0.09804	0.06842	0.01526	0.01103
121	-0.09993	0.06929	0.01455	0.01146
126.5	-0.1006	0.06945	0.01474	0.0121
132	-0.10164	0.06902	0.01445	0.01156
137.5	-0.10238	0.07	0.01588	0.01199
143	-0.10352	0.06949	0.01523	0.01201
148.5	-0.1044	0.07038	0.01509	0.01279
154	-0.10526	0.07097	0.01556	0.01309
159.5	-0.10579	0.07061	0.01552	0.01309
165	-0.10669	0.0706	0.01613	0.01289
170.5	-0.10767	0.07093	0.01574	0.01321
176	-0.10819	0.07115	0.01607	0.01322
181.5	-0.10886	0.07168	0.01612	0.01342
187	-0.10962	0.07136	0.01595	0.01347
192.5	-0.11027	0.07104	0.01642	0.01399
198	-0.11085	0.07184	0.01621	0.014
203.5	-0.11094	0.07117	0.01574	0.01404
209	-0.11198	0.07154	0.01687	0.01491
214.5	-0.11179	0.07134	0.01591	0.01461
220	-0.11267	0.07169	0.01687	0.01505
225.5	-0.11334	0.07172	0.01643	0.0154
231	-0.11426	0.07188	0.01664	0.01463
236.5	-0.11442	0.07264	0.0164	0.01491
242	-0.11486	0.07153	0.01676	0.01492
247.5	-0.11443	0.07195	0.01744	0.01537
253	-0.11517	0.07195	0.01685	0.01623
258.5	-0.1163	0.07199	0.01733	0.01608
264	-0.11673	0.07158	0.01657	0.01552
269.5	-0.11734	0.07135	0.01706	0.01515
275	-0.11721	0.07175	0.01721	0.01574
280.5	-0.11728	0.07186	0.01704	0.01611
286	-0.11785	0.07146	0.01721	0.01668
291.5	-0.11813	0.07094	0.01698	0.01658
297	-0.11753	0.07096	0.01732	0.01586
302.5	-0.11909	0.0714	0.01717	0.01639
308	-0.11911	0.07166	0.01694	0.01624
313.5	-0.11936	0.07059	0.01708	0.01656
319	-0.1193	0.07084	0.01717	0.01746
324.5	-0.11957	0.07103	0.01649	0.01749
330	-0.11983	0.0711	0.01727	0.01719
335.5	-0.12	0.0708	0.01732	0.01676
341	-0.12049	0.07109	0.01743	0.01768
346.5	-0.12036	0.07051	0.01743	0.01684
352	-0.1212	0.07078	0.01659	0.01721
357.5	-0.1216	0.07023	0.01741	0.0174
363	-0.12137	0.07013	0.01767	0.01759
368.5	-0.12124	0.06983	0.01753	0.01732
374	-0.12124	0.06967	0.01666	0.01791
379.5	-0.12155	0.0695	0.01707	0.01764
385	-0.12211	0.07025	0.01727	0.01797
390.5	-0.12218	0.06959	0.01744	0.01803
396	-0.1224	0.06928	0.01672	0.01743
401.5	-0.12208	0.06896	0.01638	0.01811
407	-0.12208	0.069	0.01717	0.01748
412.5	-0.12203	0.06913	0.01716	0.0182
418	-0.12278	0.0688	0.0166	0.01773
423.5	-0.12333	0.0686	0.01619	0.01842
429	-0.12287	0.06825	0.01672	0.01881
434.5	-0.12308	0.06893	0.01691	0.01787
440	-0.12357	0.06826	0.01663	0.0186
445.5	-0.12285	0.06795	0.01665	0.01869
451	-0.1232	0.06769	0.01639	0.01826
456.5	-0.12395	0.06825	0.01682	0.01856
462	-0.12374	0.06805	0.01742	0.0185
467.5	-0.12403	0.06726	0.0174	0.01805
473	-0.12379	0.06751	0.01821	0.01696
478.5	-0.12349	0.06833	0.01948	0.01596
484	-0.12284	0.06729	0.01968	0.01499
489.5	-0.12299	0.06838	0.02	0.0139
495	-0.12204	0.0674	0.01999	0.01321
500.5	-0.12196	0.06809	0.02055	0.013
506	-0.12091	0.06845	0.02052	0.01217
511.5	-0.12111	0.06821	0.02	0.01141
517	-0.12054	0.06844	0.02045	0.011
522.5	-0.11987	0.06912	0.02002	0.01137
528	-0.11899	0.06883	0.01953	0.01085
533.5	-0.11996	0.06916	0.02009	0.00987
539	-0.11845	0.0691	0.02007	0.00967
544.5	-0.11827	0.06863	0.01886	0.00901
550	-0.11783	0.06942	0.0189	0.00978
555.5	-0.11776	0.06965	0.01889	0.00894
561	-0.11767	0.06927	0.01912	0.00889
566.5	-0.11635	0.06804	0.01878	0.00854
572	-0.11671	0.06908	0.01866	0.00851
577.5	-0.11608	0.06844	0.01847	0.0077
583	-0.11569	0.06884	0.01864	0.00838
588.5	-0.11557	0.0688	0.018	0.00788
594	-0.11514	0.0681	0.01804	0.00809
599.5	-0.11426	0.06794	0.01784	0.00781
605	-0.11429	0.06868	0.01784	0.00728
610.5	-0.11361	0.06725	0.01752	0.00641
616	-0.11322	0.06794	0.01738	0.00759
621.5	-0.11275	0.06814	0.01756	0.00704
627	-0.11207	0.06742	0.01722	0.00757
632.5	-0.11183	0.06684	0.01769	0.00718
638	-0.11153	0.06695	0.01714	0.00616
643.5	-0.11139	0.06707	0.01681	0.00725
649	-0.11116	0.06711	0.01694	0.00609
654.5	-0.10989	0.06699	0.01676	0.00703
660	-0.10963	0.0664	0.01693	0.00642
665.5	-0.10969	0.06575	0.01643	0.0067
671	-0.10889	0.06605	0.01652	0.00672
676.5	-0.10859	0.06587	0.01613	0.00653
682	-0.10838	0.06556	0.01613	0.00607
687.5	-0.10851	0.06513	0.01608	0.00601
693	-0.1081	0.06541	0.01598	0.00624
698.5	-0.1075	0.06494	0.01564	0.00599
704	-0.10678	0.06476	0.01635	0.00639
709.5	-0.1072	0.06403	0.01565	0.00536
715	-0.10666	0.06413	0.01601	0.00633
720.5	-0.10559	0.06403	0.01563	0.0063
726	-0.10601	0.0637	0.01529	0.00548
731.5	-0.10534	0.06344	0.01579	0.00596
737	-0.10475	0.06327	0.01577	0.00557
742.5	-0.10455	0.06299	0.0154	0.00516
748	-0.10445	0.06305	0.01572	0.00579
753.5	-0.10337	0.06247	0.0152	0.00566
759	-0.10295	0.06196	0.01473	0.00548
764.5	-0.10293	0.06264	0.01515	0.00516
770	-0.10244	0.06223	0.01493	0.00563
775.5	-0.10175	0.06131	0.01445	0.00578
781	-0.10169	0.0608	0.01456	0.00537
786.5	-0.10132	0.0614	0.01428	0.00547
792	-0.10117	0.06217	0.0147	0.00571
797.5	-0.10076	0.06133	0.01505	0.00539
803	-0.10033	0.06051	0.01457	0.00547
808.5	-0.09936	0.06034	0.01397	0.00593
814	-0.09956	0.0598	0.01448	0.0053
819.5	-0.09967	0.05959	0.01421	0.0053
825	-0.09922	0.06015	0.01416	0.00503
830.5	-0.09895	0.05943	0.01432	0.00533
836	-0.09866	0.05901	0.01438	0.00448
841.5	-0.09832	0.05847	0.01418	0.00446
847	-0.09755	0.05927	0.01429	0.00492
852.5	-0.09664	0.05882	0.01431	0.00467
858	-0.09659	0.05821	0.01383	0.00532
863.5	-0.09662	0.058	0.01419	0.00545
869	-0.09607	0.05728	0.01324	0.0049
874.5	-0.096	0.05799	0.01383	0.00495
880	-0.09579	0.05706	0.01355	0.00465
885.5	-0.09539	0.05692	0.01328	0.00493
891	-0.09502	0.05748	0.01389	0.00467
896.5	-0.0948	0.05647	0.01367	0.00449
902	-0.09509	0.05723	0.01356	0.00501
907.5	-0.09441	0.05648	0.01297	0.00516
913	-0.09385	0.05629	0.01368	0.00477
918.5	-0.09369	0.05592	0.0133	0.00462
924	-0.09304	0.05485	0.01363	0.00492
929.5	-0.09338	0.0553	0.01304	0.00472
935	-0.09255	0.05516	0.01273	0.00512
940.5	-0.09283	0.05499	0.01314	0.00451
946	-0.09233	0.05437	0.01324	0.00464
951.5	-0.09209	0.05449	0.01302	0.0046
957	-0.09181	0.05443	0.01273	0.00434
962.5	-0.09134	0.0544	0.01296	0.00479
968	-0.09061	0.05416	0.01294	0.00468
973.5	-0.09063	0.05336	0.01316	0.00494
979	-0.09034	0.05274	0.01289	0.0049
984.5	-0.08986	0.05263	0.01326	0.00483
990	-0.08986	0.05248	0.01262	0.00408
995.5	-0.08996	0.05296	0.01253	0.00489
1001	-0.08881	0.05257	0.01316	0.00455
1006.5	-0.08898	0.05228	0.01284	0.00477

## Sheet: Fig.3A top spectrum
X	data	fit	Hred	Hred*	HoxH	Hox	Hhyd	Hred'	Hsred	Hsred*
1715.03	-4.66071e-05	-7.51612e-92	0	2.77886e-288	-1.51293e-139	-5.78218e-115	0	-7.51612e-92	0	0
1715.67	-3.67946e-05	-3.50461e-90	0	5.33363e-286	-2.28435e-137	-5.43103e-113	0	-3.50461e-90	0	0
1716.32	-3.05741e-05	-1.57455e-88	0	1.00228e-283	-3.31144e-135	-4.89759e-111	0	-1.57455e-88	0	0
1716.96	-2.22308e-05	-6.81629e-87	0	1.84401e-281	-4.60871e-133	-4.24025e-109	0	-6.81629e-87	0	0
1717.6	-1.19452e-05	-2.84322e-85	0	3.32159e-279	-6.15817e-131	-3.52459e-107	--	-2.84322e-85	0	0
1718.24	-4.45214e-06	-1.14273e-83	0	5.85788e-277	-7.90011e-129	-2.81278e-105	--	-1.14273e-83	0	0
1718.89	-9.34253e-07	-4.4254e-82	0	1.01145e-274	-9.73024e-127	-2.15513e-103	--	-4.4254e-82	0	0
1719.53	5.19493e-06	-1.65132e-80	0	1.70984e-272	-1.1506e-124	-1.58532e-101	--	-1.65132e-80	0	0
1720.17	1.98496e-05	-5.93722e-79	0	2.82994e-270	-1.30627e-122	-1.11962e-99	--	-5.93722e-79	0	0
1720.82	3.83924e-05	-2.05687e-77	0	4.58573e-268	-1.4238e-120	-7.59165e-98	1.92993e-307	-2.05687e-77	0	0
1721.46	4.92253e-05	-6.86598e-76	0	7.27528e-266	-1.48997e-118	-4.94207e-96	2.21861e-304	-6.86598e-76	0	0
1722.1	4.59568e-05	-2.20836e-74	0	1.13006e-263	-1.49697e-116	-3.08881e-94	2.46077e-301	-2.20836e-74	0	0
1722.74	3.23342e-05	-6.84402e-73	0	1.71854e-261	-1.44397e-114	-1.85345e-92	2.63338e-298	-6.84402e-73	0	0
1723.39	1.5888e-05	-2.04373e-71	0	2.55876e-259	-1.33725e-112	-1.06778e-90	2.71898e-295	-2.04373e-71	0	0
1724.03	2.39677e-06	-5.88042e-70	0	3.72999e-257	-1.18898e-110	-5.90597e-89	2.70864e-292	-5.88042e-70	0	0
1724.67	-3.19707e-06	-1.63029e-68	0	5.32349e-255	-1.01496e-108	-3.13624e-87	2.60344e-289	-1.63029e-68	0	0
1725.32	2.9525e-06	-4.35507e-67	0	7.43865e-253	-8.31818e-107	-1.59896e-85	2.41432e-286	-4.35507e-67	0	0
1725.96	1.7344e-05	-1.12098e-65	0	1.01766e-250	-6.54514e-105	-7.82661e-84	2.1602e-283	-1.12098e-65	0	0
1726.6	2.91283e-05	-2.78016e-64	0	1.36307e-248	-4.94446e-103	-3.67806e-82	1.86485e-280	-2.78016e-64	0	0
1727.24	2.91466e-05	-6.64379e-63	0	1.78749e-246	-3.58614e-101	-1.65949e-80	1.55326e-277	-6.64379e-63	0	0
1727.89	1.89379e-05	-1.5298e-61	0	2.29498e-244	-2.49716e-99	-7.1885e-79	1.24824e-274	-1.5298e-61	0	--
1728.53	5.68004e-06	-3.3941e-60	0	2.88486e-242	-1.66945e-97	-2.98959e-77	9.67838e-272	-3.3941e-60	0	--
1729.17	-5.94586e-06	-7.25584e-59	0	3.55042e-240	-1.07154e-95	-1.19369e-75	7.24033e-269	-7.25584e-59	0	--
1729.82	-1.42699e-05	-1.49459e-57	0	4.27802e-238	-6.6032e-94	-4.57598e-74	5.22595e-266	-1.49459e-57	0	--
1730.46	-1.58647e-05	-2.9664e-56	0	5.04681e-236	-3.90669e-92	-1.68417e-72	3.63935e-263	-2.9664e-56	0	--
1731.1	-9.06979e-06	-5.67295e-55	0	5.82908e-234	-2.21908e-90	-5.95106e-71	2.44531e-260	-5.67295e-55	0	--
1731.74	9.94578e-07	-1.04535e-53	0	6.59162e-232	-1.21017e-88	-2.01889e-69	1.58524e-257	-1.04535e-53	0	1.73311e-305
1732.39	6.3089e-06	-1.85603e-52	0	7.29784e-230	-6.33617e-87	-6.57568e-68	9.91534e-255	-1.85603e-52	0	1.38224e-302
1733.03	5.55095e-06	-3.17527e-51	0	7.91053e-228	-3.18506e-85	-2.05626e-66	5.98372e-252	-3.17527e-51	0	1.06728e-299
1733.67	6.16703e-06	-5.23418e-50	0	8.39511e-226	-1.53716e-83	-6.17339e-65	3.48407e-249	-5.23418e-50	0	7.97836e-297
1734.32	1.51556e-05	-8.3136e-49	0	8.72282e-224	-7.12242e-82	-1.77942e-63	1.95728e-246	-8.3136e-49	0	5.77413e-294
1734.96	3.17734e-05	-1.27234e-47	0	8.87354e-222	-3.16844e-80	-4.92428e-62	1.06089e-243	-1.27234e-47	0	4.04573e-291
1735.6	4.78331e-05	-1.87623e-46	0	8.83784e-220	-1.35323e-78	-1.30833e-60	5.54806e-241	-1.87623e-46	0	2.7444e-288
1736.24	5.24497e-05	-2.6659e-45	0	8.61797e-218	-5.54893e-77	-3.33733e-59	2.79938e-238	-2.6659e-45	0	1.80233e-285
1736.89	3.94986e-05	-3.64984e-44	0	8.2276e-216	-2.18452e-75	-8.17317e-58	1.36281e-235	-3.64984e-44	0	1.14594e-282
1737.53	1.24954e-05	-4.81477e-43	0	7.69043e-214	-8.25677e-74	-1.92173e-56	6.40114e-233	-4.81477e-43	0	7.05383e-280
1738.17	-1.66479e-05	-6.11997e-42	0	7.03782e-212	-2.99622e-72	-4.33812e-55	2.9009e-230	-6.11997e-42	0	4.20366e-277
1738.82	-3.76963e-05	-7.49541e-41	0	6.30572e-210	-1.04387e-70	-9.402e-54	1.26841e-227	-7.49541e-41	0	2.42532e-274
1739.46	-5.00639e-05	-8.84532e-40	0	5.53148e-208	-3.49164e-69	-1.95636e-52	5.35102e-225	-8.84532e-40	0	1.35471e-271
1740.1	-5.73672e-05	-1.00578e-38	0	4.75069e-206	-1.1213e-67	-3.90828e-51	2.17804e-222	-1.00578e-38	0	7.32598e-269
1740.74	-6.07723e-05	-1.10196e-37	0	3.99468e-204	-3.45717e-66	-7.49604e-50	8.55354e-220	-1.10196e-37	0	3.8355e-266
1741.39	-5.83014e-05	-1.16333e-36	0	3.28864e-202	-1.02336e-64	-1.38034e-48	3.24099e-217	-1.16333e-36	0	1.94409e-263
1742.03	-5.00633e-05	-1.18334e-35	0	2.6507e-200	-2.90836e-63	-2.44035e-47	1.18484e-214	-1.18334e-35	0	9.54e-261
1742.67	-3.84173e-05	-1.15982e-34	0	2.09177e-198	-7.93554e-62	-4.14214e-46	4.17922e-212	-1.15982e-34	0	4.53231e-258
1743.31	-2.68334e-05	-1.09532e-33	0	1.61613e-196	-2.0788e-60	-6.75007e-45	1.42227e-209	-1.09532e-33	0	2.08463e-255
1743.96	-1.94149e-05	-9.96701e-33	0	1.2225e-194	-5.22829e-59	-1.05609e-43	4.67002e-207	-9.96701e-33	0	9.28274e-253
1744.6	-1.77998e-05	-8.73898e-32	0	9.05381e-193	-1.26245e-57	-1.58636e-42	1.47947e-204	-8.73898e-32	0	4.00186e-250
1745.24	-1.93345e-05	-7.38294e-31	0	6.56482e-191	-2.9267e-56	-2.28776e-41	4.52218e-202	-7.38294e-31	0	1.67027e-247
1745.89	-1.87806e-05	-6.00994e-30	0	4.66041e-189	-6.51406e-55	-3.1676e-40	1.33364e-199	-6.00994e-30	0	6.74914e-245
1746.53	-1.62121e-05	-4.71393e-29	0	3.23917e-187	-1.39198e-53	-4.21074e-39	3.79474e-197	-4.71393e-29	0	2.64028e-242
1747.17	-1.74105e-05	-3.56261e-28	0	2.20422e-185	-2.85579e-52	-5.37398e-38	1.04178e-194	-3.56261e-28	0	9.99973e-240
1747.81	-2.57884e-05	-2.59433e-27	0	1.46853e-183	-5.62505e-51	-6.5848e-37	2.75944e-192	-2.59433e-27	0	3.66662e-237
1748.46	-3.70471e-05	-1.82035e-26	0	9.57905e-182	-1.06374e-49	-7.74638e-36	7.0521e-190	-1.82035e-26	0	1.30161e-234
1749.1	-4.32672e-05	-1.23071e-25	0	6.11746e-180	-1.93132e-48	-8.7491e-35	1.73887e-187	-1.23071e-25	0	4.47338e-232
1749.74	-4.02997e-05	-8.01735e-25	0	3.82497e-178	-3.36654e-47	-9.48718e-34	4.13682e-185	-8.01735e-25	0	1.48843e-229
1750.39	-3.0686e-05	-5.03242e-24	0	2.34151e-176	-5.63405e-46	-9.87689e-33	9.49549e-183	-5.03242e-24	0	4.79467e-227
1751.03	-1.91736e-05	-3.04366e-23	0	1.40337e-174	-9.05246e-45	-9.87217e-32	2.1029e-180	-3.04366e-23	0	1.4953e-224
1751.67	-6.8366e-06	-1.77373e-22	0	8.23491e-173	-1.39644e-43	-9.47358e-31	4.49338e-178	-1.77373e-22	0	4.51477e-222
1752.31	7.63469e-06	-9.95977e-22	0	4.73102e-171	-2.06817e-42	-8.72819e-30	9.26357e-176	-9.95977e-22	0	1.31972e-219
1752.96	2.30987e-05	-5.38871e-21	0	2.66109e-169	-2.94076e-41	-7.72047e-29	1.84262e-173	-5.38871e-21	0	3.73478e-217
1753.6	3.65062e-05	-2.80926e-20	0	1.46546e-167	-4.0146e-40	-6.55651e-28	3.53625e-171	-2.80926e-20	0	1.02326e-214
1754.24	4.66707e-05	-1.41114e-19	0	7.9013e-166	-5.2618e-39	-5.34577e-27	6.5479e-169	-1.41114e-19	0	2.71424e-212
1754.89	5.3739e-05	-6.83004e-19	0	4.17092e-164	-6.62118e-38	-4.18463e-26	1.1698e-166	-6.83004e-19	0	6.97023e-210
1755.53	5.44979e-05	-3.18528e-18	0	2.15563e-162	-7.99918e-37	-3.14495e-25	2.01639e-164	-3.18528e-18	0	1.73294e-207
1756.17	4.40202e-05	-1.43134e-17	0	1.09076e-160	-9.27823e-36	-2.26923e-24	3.35342e-162	-1.43134e-17	0	4.17119e-205
1756.81	2.56191e-05	-6.19744e-17	0	5.40368e-159	-1.03322e-34	-1.572e-23	5.38088e-160	-6.19744e-17	0	9.72017e-203
1757.46	1.10417e-05	-2.58555e-16	0	2.62096e-157	-1.10467e-33	-1.04553e-22	8.33046e-158	-2.58555e-16	0	2.19294e-200
1758.1	8.54076e-06	-1.03936e-15	0	1.24464e-155	-1.13391e-32	-6.67619e-22	1.24433e-155	-1.03936e-15	0	4.78979e-198
1758.74	1.45449e-05	-4.0258e-15	0	5.78672e-154	-1.11746e-31	-4.09289e-21	1.79331e-153	-4.02579e-15	0	1.01285e-195
1759.39	2.07069e-05	-1.50248e-14	0	2.6341e-152	-1.0573e-30	-2.40902e-20	2.49359e-151	-1.50248e-14	0	2.07354e-193
1760.03	2.49082e-05	-5.40306e-14	0	1.17393e-150	-9.60443e-30	-1.36132e-19	3.3454e-149	-5.40305e-14	0	4.10977e-191
1760.67	2.98506e-05	-1.87216e-13	0	5.12225e-149	-8.37635e-29	-7.38567e-19	4.33033e-147	-1.87215e-13	0	7.88609e-189
1761.31	3.53602e-05	-6.25054e-13	0	2.18821e-147	-7.01369e-28	-3.84705e-18	5.4081e-145	-6.2505e-13	0	1.46502e-186
1761.96	3.76939e-05	-2.01078e-12	0	9.15223e-146	-5.6383e-27	-1.92387e-17	6.51659e-143	-2.01076e-12	0	2.6349e-184
1762.6	3.63275e-05	-6.23284e-12	0	3.74778e-144	-4.3517e-26	-9.23701e-17	7.57614e-141	-6.23275e-12	0	4.588e-182
1763.24	3.48049e-05	-1.86158e-11	0	1.50256e-142	-3.22462e-25	-4.25791e-16	8.49819e-139	-1.86153e-11	0	7.73429e-180
1763.88	3.56266e-05	-5.35734e-11	0	5.8979e-141	-2.29407e-24	-1.88439e-15	9.19721e-137	-5.35715e-11	0	1.26228e-177
1764.53	3.53254e-05	-1.48557e-10	0	2.26659e-139	-1.56691e-23	-8.00673e-15	9.60367e-135	-1.48549e-10	0	1.99448e-175
1765.17	2.74464e-05	-3.96929e-10	0	8.52822e-138	-1.02752e-22	-3.26624e-14	9.67542e-133	-3.96896e-10	0	3.05099e-173
1765.81	8.9471e-06	-1.02191e-09	0	3.14161e-136	-6.46915e-22	-1.27923e-13	9.4049e-131	-1.02178e-09	0	4.51847e-171
1766.46	-1.55037e-05	-2.53508e-09	0	1.13307e-134	-3.91032e-21	-4.81017e-13	8.82042e-129	-2.53459e-09	0	6.47859e-169
1767.1	-3.63346e-05	-6.05978e-09	0	4.00102e-133	-2.26927e-20	-1.73652e-12	7.98135e-127	-6.05805e-09	0	8.99306e-167
1767.74	-4.47193e-05	-1.39578e-08	0	1.38323e-131	-1.26436e-19	-6.0188e-12	6.9681e-125	-1.39518e-08	0	1.20857e-164
1768.38	-4.01836e-05	-3.09798e-08	0	4.68195e-130	-6.76336e-19	-2.00285e-11	5.86954e-123	-3.09598e-08	0	1.57245e-162
1769.03	-3.01582e-05	-6.62611e-08	0	1.55156e-128	-3.47347e-18	-6.39876e-11	4.77029e-121	-6.61971e-08	0	1.9807e-160
1769.67	-2.23943e-05	-1.36577e-07	0	5.03408e-127	-1.71267e-17	-1.96269e-10	3.74056e-119	-1.3638e-07	0	2.41545e-158
1770.31	-1.95243e-05	-2.71309e-07	0	1.59912e-125	-8.10764e-17	-5.77988e-10	2.82996e-117	-2.70731e-07	0	2.85179e-156
1770.96	-1.94496e-05	-5.19473e-07	0	4.97338e-124	-3.68488e-16	-1.63416e-09	2.06574e-115	-5.17839e-07	0	3.25967e-154
1771.6	-2.12413e-05	-9.58824e-07	0	1.51437e-122	-1.60791e-15	-4.43585e-09	1.45486e-113	-9.54388e-07	0	3.60719e-152
1772.24	-2.57808e-05	-1.70639e-06	0	4.51462e-121	-6.7361e-15	-1.15603e-08	9.88598e-112	-1.69483e-06	0	3.86459e-150
1772.88	-3.25787e-05	-2.92895e-06	0	1.31771e-119	-2.70935e-14	-2.89249e-08	6.4814e-110	-2.90002e-06	0	4.00843e-148
1773.53	-3.9238e-05	-4.8508e-06	0	3.76555e-118	-1.04624e-13	-6.94839e-08	4.09986e-108	-4.78132e-06	0	4.02518e-146
1774.17	-4.30713e-05	-7.75593e-06	0	1.05353e-116	-3.87886e-13	-1.60252e-07	2.50219e-106	-7.59568e-06	0	3.91321e-144
1774.81	-4.42371e-05	-1.19816e-05	0	2.88585e-115	-1.38066e-12	-3.54841e-07	1.47341e-104	-1.16267e-05	--	3.68316e-142
1775.46	-4.36316e-05	-1.79026e-05	0	7.73945e-114	-4.71825e-12	-7.5435e-07	8.37103e-103	-1.71483e-05	--	3.35618e-140
1776.1	-4.21953e-05	-2.59097e-05	--	2.03215e-112	-1.54804e-11	-1.53964e-06	4.58865e-101	-2.437e-05	--	2.9608e-138
1776.74	-4.18973e-05	-3.63877e-05	--	5.22411e-111	-4.87634e-11	-3.01701e-06	2.42685e-99	-3.33706e-05	--	2.52878e-136
1777.38	-4.79323e-05	-4.97057e-05	--	1.31485e-109	-1.47473e-10	-5.67601e-06	1.23837e-97	-4.40295e-05	--	2.09098e-134
1778.03	-6.71195e-05	-6.62279e-05	--	3.24005e-108	-4.28197e-10	-1.02522e-05	6.09693e-96	-5.59752e-05	1.17388e-304	1.6739e-132
1778.67	-0.000100593	-8.63478e-05	--	7.81693e-107	-1.19366e-09	-1.77788e-05	2.89616e-94	-6.85678e-05	4.17849e-301	1.29732e-130
1779.31	-0.000140829	-0.000110535	1.62633e-305	1.84642e-105	-3.19469e-09	-2.96003e-05	1.32735e-92	-8.09314e-05	1.41679e-297	9.73422e-129
1779.96	-0.000178584	-0.000139365	3.6511e-302	4.27005e-104	-8.20891e-09	-4.7315e-05	5.86948e-91	-9.20419e-05	4.57599e-294	7.07122e-127
1780.6	-0.000212316	-0.000173494	7.85141e-299	9.66821e-103	-2.02512e-08	-7.26123e-05	2.50418e-89	-0.000100862	1.40785e-290	4.97309e-125
1781.24	-0.000248189	-0.000213533	1.61725e-295	2.14323e-101	-4.79652e-08	-0.000106987	1.03082e-87	-0.000106498	4.12591e-287	3.38607e-123
1781.88	-0.000294109	-0.000259801	3.19092e-292	4.65157e-100	-1.09071e-07	-0.000151343	4.09402e-86	-0.000108349	1.1518e-283	2.23205e-121
1782.53	-0.000353787	-0.000311994	6.03059e-289	9.88418e-99	-2.38124e-07	-0.000205542	1.56881e-84	-0.000106214	3.06283e-280	1.42446e-119
1783.17	-0.000424267	-0.000368833	1.09172e-285	2.05632e-97	-4.9912e-07	-0.000268008	5.80017e-83	-0.000100326	7.75822e-277	8.80108e-118
1783.81	-0.000493987	-0.000427824	1.89308e-282	4.18843e-96	-1.00442e-06	-0.00033551	2.06901e-81	-9.13094e-05	1.87195e-273	5.26453e-116
1784.45	-0.00054728	-0.000485262	3.14437e-279	8.35258e-95	-1.9406e-06	-0.000403248	7.12094e-80	-8.00737e-05	4.30247e-270	3.04874e-114
1785.1	-0.000575719	-0.000536576	5.00271e-276	1.6308e-93	-3.5997e-06	-0.000465315	2.36463e-78	-6.76607e-05	9.41963e-267	1.70931e-112
1785.74	-0.000580893	-0.000577002	7.62403e-273	3.11737e-92	-6.41069e-06	-0.000515504	7.57598e-77	-5.50878e-05	1.96445e-263	9.2781e-111
1786.38	-0.000568957	-0.000602486	1.11294e-269	5.83426e-91	-1.09611e-05	-0.000548309	2.34189e-75	-4.32162e-05	3.90249e-260	4.87569e-109
1787.03	-0.000544151	-0.000610583	1.55619e-266	1.06904e-89	-1.79933e-05	-0.000559923	6.98468e-74	-3.26671e-05	7.38472e-257	2.48056e-107
1787.67	-0.000511058	-0.00060111	2.08431e-263	1.91783e-88	-2.8358e-05	-0.000548959	2.00991e-72	-2.37928e-05	1.33112e-253	1.22181e-105
1788.31	-0.000475155	-0.000576334	2.67404e-260	3.3685e-87	-4.29092e-05	-0.000516727	5.58032e-71	-1.66976e-05	2.28557e-250	5.82633e-104
1788.95	-0.000438952	-0.000540599	3.28611e-257	5.79258e-86	-6.23354e-05	-0.000466973	1.49483e-69	-1.1291e-05	3.73821e-247	2.68983e-102
1789.6	-0.000400947	-0.000499462	3.86814e-254	9.75254e-85	-8.69418e-05	-0.000405164	3.86347e-68	-7.35675e-06	5.82403e-244	1.20225e-100
1790.24	-0.000360133	-0.000458544	4.36143e-251	1.60758e-83	-0.000116421	-0.000337504	9.63415e-67	-4.6186e-06	8.64324e-241	5.20235e-99
1790.88	-0.000320124	-0.000422387	4.71045e-248	2.5944e-82	-0.000149673	-0.000269921	2.31793e-65	-2.79388e-06	1.22186e-237	2.17944e-97
1791.53	-0.000286077	-0.000393624	4.87308e-245	4.09931e-81	-0.000184741	-0.000207254	5.38072e-64	-1.62846e-06	1.64535e-234	8.8395e-96
1792.17	-0.000260019	-0.000372623	4.82893e-242	6.34152e-80	-0.000218924	-0.000152784	1.20512e-62	-9.14571e-07	2.11051e-231	3.47096e-94
1792.81	-0.000240071	-0.000357705	4.58359e-239	9.60475e-79	-0.000249076	-0.000108134	2.60419e-61	-4.94915e-07	2.57874e-228	1.3195e-92
1793.45	-0.000223561	-0.000345806	4.16742e-236	1.42426e-77	-0.00027207	-7.34781e-05	5.42957e-60	-2.58057e-07	3.00138e-225	4.85631e-91
1794.1	-0.000210324	-0.000333389	3.62941e-233	2.06776e-76	-0.000285323	-4.79359e-05	1.09222e-58	-1.29651e-07	3.32757e-222	1.73039e-89
1794.74	-0.00020322	-0.000317366	3.02769e-230	2.93914e-75	-0.000287279	-3.00243e-05	2.11985e-57	-6.27631e-08	3.51418e-219	5.96922e-88
1795.38	-0.00020471	-0.000295786	2.41932e-227	4.09027e-74	-0.000277702	-1.80549e-05	3.96965e-56	-2.92757e-08	3.5352e-216	1.99357e-86
1796.03	-0.00021176	-0.000268166	1.85175e-224	5.57303e-73	-0.000257729	-1.04238e-05	7.17218e-55	-1.31577e-08	3.38762e-213	6.44588e-85
1796.67	-0.000217471	-0.000235429	1.35762e-221	7.43432e-72	-0.000229645	-5.77783e-06	1.25026e-53	-5.69808e-09	3.09221e-210	2.01777e-83
1797.31	-0.000216978	-0.000199531	9.53414e-219	9.70957e-71	-0.000196454	-3.07478e-06	2.10282e-52	-2.37765e-09	2.68865e-207	6.11505e-82
1797.95	-0.000213165	-0.000162923	6.41344e-216	1.24156e-69	-0.000161351	-1.57098e-06	3.41236e-51	-9.55957e-10	2.22686e-204	1.79418e-80
1798.6	-0.000210232	-0.000128002	4.13245e-213	1.55434e-68	-0.000127231	-7.70616e-07	5.34268e-50	-3.70341e-10	1.75688e-201	5.09648e-79
1799.24	-0.000206028	-9.66845e-05	2.55054e-210	1.90517e-67	-9.63214e-05	-3.62923e-07	8.07076e-49	-1.38241e-10	1.32034e-198	1.40157e-77
1799.88	-0.000194024	-7.01745e-05	1.50786e-207	2.28629e-66	-7.00103e-05	-1.64097e-07	1.17631e-47	-4.97217e-11	9.45189e-196	3.7316e-76
1800.53	-0.000170697	-4.89264e-05	8.53885e-205	2.68619e-65	-4.88552e-05	-7.1235e-08	1.65417e-46	-1.72316e-11	6.44533e-193	9.61866e-75
1801.17	-0.000139793	-3.27613e-05	4.63173e-202	3.08996e-64	-3.27317e-05	-2.96891e-08	2.24434e-45	-5.75411e-12	4.18662e-190	2.40034e-73
1801.81	-0.000106886	-2.10659e-05	2.40655e-199	3.47999e-63	-2.1054e-05	-1.18798e-08	2.93799e-44	-1.85141e-12	2.59044e-187	5.79921e-72
1802.45	-7.54685e-05	-1.30066e-05	1.19771e-196	3.83719e-62	-1.3002e-05	-4.56385e-09	3.71075e-43	-5.73984e-13	1.52678e-184	1.35645e-70
1803.1	-4.74488e-05	-7.71063e-06	5.70976e-194	4.14245e-61	-7.70895e-06	-1.6833e-09	4.52195e-42	-1.71462e-13	8.57178e-182	3.07168e-69
1803.74	-2.5158e-05	-4.38882e-06	2.60729e-191	4.37836e-60	-4.38823e-06	-5.96076e-10	5.31668e-41	-4.93526e-14	4.58414e-179	6.73422e-68
1804.38	-9.94403e-06	-2.39844e-06	1.14043e-188	4.53079e-59	-2.39824e-06	-2.02652e-10	6.03125e-40	-1.36875e-14	2.33527e-176	1.42934e-66
1805.03	-1.54574e-06	-1.25842e-06	4.77809e-186	4.59036e-58	-1.25836e-06	-6.61468e-11	6.60123e-39	-3.65771e-15	1.1332e-173	2.93714e-65
1805.67	1.81067e-06	-6.33928e-07	1.91755e-183	4.55333e-57	-6.33907e-07	-2.07289e-11	6.97098e-38	-9.41819e-16	5.23806e-171	5.8432e-64
1806.31	2.23426e-06	-3.06595e-07	7.37134e-181	4.42202e-56	-3.06589e-07	-6.23667e-12	7.10255e-37	-2.33667e-16	2.30635e-168	1.12542e-62
1806.95	1.9161e-06	-1.42364e-07	2.71427e-178	4.20457e-55	-1.42362e-07	-1.80152e-12	6.98211e-36	-5.58599e-17	9.67326e-166	2.09854e-61
1807.6	1.68378e-06	-6.34669e-08	9.5734e-176	3.91411e-54	-6.34664e-08	-4.99612e-13	6.62231e-35	-1.28669e-17	3.86467e-163	3.78842e-60
1808.24	1.8881e-06	-2.71646e-08	3.23434e-173	3.56741e-53	-2.71645e-08	-1.33026e-13	6.06016e-34	-2.85576e-18	1.47077e-160	6.62122e-59
1808.88	2.33598e-06	-1.11627e-08	1.04668e-170	3.18333e-52	-1.11627e-08	-3.40055e-14	5.3507e-33	-6.10719e-19	5.33172e-158	1.12036e-57
1809.52	3.84764e-06	-4.40398e-09	3.2445e-168	2.78113e-51	-4.40398e-09	-8.34586e-15	4.55814e-32	-1.25844e-19	1.84112e-155	1.83532e-56
1810.17	7.42211e-06	-1.66813e-09	9.63359e-166	2.37886e-50	-1.66813e-09	-1.96654e-15	3.74642e-31	-2.4986e-20	6.05606e-153	2.91076e-55
1810.81	1.23821e-05	-6.06631e-10	2.73991e-163	1.99218e-49	-6.06631e-10	-4.4488e-16	2.97096e-30	-4.78005e-21	1.89754e-150	4.46929e-54
1811.45	1.51147e-05	-2.11801e-10	7.46433e-161	1.63341e-48	-2.11801e-10	-9.66255e-17	2.27315e-29	-8.8113e-22	5.66346e-148	6.6437e-53
1812.1	1.13068e-05	-7.0997e-11	1.94784e-158	1.31121e-47	-7.0997e-11	-2.01488e-17	1.67807e-28	-1.56502e-22	1.61015e-145	9.56135e-52
1812.74	1.92012e-06	-2.28487e-11	4.86879e-156	1.03052e-46	-2.28487e-11	-4.03383e-18	1.19521e-27	-2.67839e-23	4.36056e-143	1.33219e-50
1813.38	-4.85632e-06	-7.0598e-12	1.16572e-153	7.92966e-46	-7.0598e-12	-7.75344e-19	8.21355e-27	-4.4167e-24	1.12489e-140	1.79702e-49
1814.02	-1.79477e-06	-2.09427e-12	2.67349e-151	5.97392e-45	-2.09427e-12	-1.4308e-19	5.44588e-26	-7.0177e-25	2.76421e-138	2.3468e-48
1814.67	8.23701e-06	-5.9646e-13	5.8731e-149	4.4063e-44	-5.9646e-13	-2.53498e-20	3.48382e-25	-1.0744e-25	6.47028e-136	2.96715e-47
1815.31	1.48834e-05	-1.63095e-13	1.23584e-146	3.18199e-43	-1.63095e-13	-4.312e-21	2.15028e-24	-1.58491e-26	1.44267e-133	3.63195e-46
1815.95	1.22295e-05	-4.2816e-14	2.49096e-144	2.24974e-42	-4.2816e-14	-7.04194e-22	1.28052e-23	-2.25278e-27	3.06411e-131	4.30407e-45
1816.6	3.15183e-06	-1.07915e-14	4.80924e-142	1.55731e-41	-1.07915e-14	-1.10412e-22	7.35749e-23	-3.08536e-28	6.19916e-129	4.93807e-44
1817.24	-6.24679e-06	-2.61137e-15	8.89392e-140	1.05543e-40	-2.61137e-15	-1.66206e-23	4.07872e-22	-4.07158e-29	1.19469e-126	5.48495e-43
1817.88	-1.36932e-05	-6.06682e-16	1.57549e-137	7.00311e-40	-6.06684e-16	-2.40207e-24	2.18157e-21	-5.17719e-30	2.19314e-124	5.8983e-42
1818.52	-1.93507e-05	-1.3531e-16	2.6733e-135	4.54949e-39	-1.35321e-16	-3.33301e-25	1.12581e-20	-6.34303e-31	3.83505e-122	6.14072e-41
1819.17	-2.29502e-05	-2.89227e-17	4.34495e-133	2.89363e-38	-2.89787e-17	-4.44012e-26	5.60549e-20	-7.48809e-32	6.38806e-120	6.18943e-40
1819.81	-2.44277e-05	-5.68872e-18	6.7644e-131	1.80191e-37	-5.95801e-18	-5.67888e-27	2.69285e-19	-8.51762e-33	1.01358e-117	6.03976e-39
1820.45	-2.46877e-05	7.2073e-20	1.00874e-128	1.09859e-36	-1.17607e-18	-6.97332e-28	1.24814e-18	-9.3355e-34	1.53193e-115	5.70594e-38
1821.1	-2.55364e-05	5.35881e-18	1.44092e-126	6.55759e-36	-2.22881e-19	-8.22102e-29	5.58169e-18	-9.85892e-35	2.20553e-113	5.21882e-37
1821.74	-2.66004e-05	2.40429e-17	1.97153e-124	3.83233e-35	-4.05529e-20	-9.3051e-30	2.40835e-17	-1.00321e-35	3.02467e-111	4.62122e-36
1822.38	-2.60538e-05	1.00252e-16	2.5839e-122	2.19276e-34	-7.08402e-21	-1.01117e-30	1.00259e-16	-9.83624e-37	3.95126e-109	3.96168e-35
1823.02	-2.35121e-05	4.02697e-16	3.2438e-120	1.22837e-33	-1.18808e-21	-1.05497e-31	4.02699e-16	-9.2926e-38	4.91683e-107	3.28806e-34
1823.67	-1.99768e-05	1.56059e-15	3.90068e-118	6.73716e-33	-1.91304e-22	-1.05672e-32	1.56059e-15	-8.45897e-39	5.8281e-105	2.64204e-33
1824.31	-1.56969e-05	5.83508e-15	4.49296e-116	3.61771e-32	-2.9574e-23	-1.01623e-33	5.83508e-15	-7.41943e-40	6.58053e-103	2.0553e-32
1824.95	-9.66203e-06	2.10502e-14	4.95715e-114	1.90196e-31	-4.3894e-24	-9.38282e-35	2.10502e-14	-6.2704e-41	7.07761e-101	1.54793e-31
1825.6	-1.68173e-06	7.32687e-14	5.23888e-112	9.78986e-31	-6.25473e-25	-8.31732e-36	7.32687e-14	-5.10614e-42	7.25112e-99	1.12867e-30
1826.24	5.18617e-06	2.46055e-13	5.30337e-110	4.93358e-30	-8.557e-26	-7.07852e-37	2.46055e-13	-4.00647e-43	7.07644e-97	7.96743e-30
1826.88	7.43677e-06	7.97253e-13	5.14247e-108	2.4342e-29	-1.12394e-26	-5.78377e-38	7.97253e-13	-3.02903e-44	6.57835e-95	5.44514e-29
1827.52	3.71092e-06	2.49237e-12	4.77638e-106	1.17587e-28	-1.41734e-27	-4.5372e-39	2.49237e-12	-2.20657e-45	5.82521e-93	3.60278e-28
1828.17	-4.63856e-06	7.5176e-12	4.24946e-104	5.56128e-28	-1.71599e-28	-3.41723e-40	7.5176e-12	-1.54883e-46	4.91358e-91	2.30784e-27
1828.81	-1.5443e-05	2.18775e-11	3.62138e-102	2.57512e-27	-1.99464e-29	-2.47098e-41	2.18775e-11	-1.04752e-47	3.948e-89	1.43123e-26
1829.45	-2.61575e-05	6.14282e-11	2.95612e-100	1.16743e-26	-2.22599e-30	-1.71544e-42	6.14282e-11	-6.82641e-49	3.02167e-87	8.59319e-26
1830.09	-3.35108e-05	1.66414e-10	2.31141e-98	5.18171e-26	-2.38502e-31	-1.14337e-43	1.66414e-10	-4.28642e-50	2.20298e-85	4.99501e-25
1830.74	-3.56919e-05	4.34973e-10	1.73116e-96	2.25177e-25	-2.4534e-32	-7.31663e-45	4.34973e-10	-2.5934e-51	1.52991e-83	2.81098e-24
1831.38	-3.45593e-05	1.09695e-09	1.24196e-94	9.58045e-25	-2.42301e-33	-4.49514e-46	1.09695e-09	-1.51188e-52	1.01207e-81	1.5315e-23
1832.02	-3.28245e-05	2.66908e-09	8.53458e-93	3.99077e-24	-2.29747e-34	-2.65145e-47	2.66908e-09	-8.49252e-54	6.3775e-80	8.07817e-23
1832.67	-2.95967e-05	6.26597e-09	5.61778e-91	1.62756e-23	-2.09148e-35	-1.50153e-48	6.26597e-09	-4.59651e-55	3.82809e-78	4.12523e-22
1833.31	-2.07778e-05	1.41928e-08	3.54204e-89	6.4987e-23	-1.82796e-36	-8.16382e-50	1.41928e-08	-2.39713e-56	2.1888e-76	2.03949e-21
1833.95	-5.81605e-06	3.10167e-08	2.13919e-87	2.54054e-22	-1.53388e-37	-4.2615e-51	3.10167e-08	-1.20456e-57	1.19212e-74	9.7619e-21
1834.59	1.03082e-05	6.53999e-08	1.23752e-85	9.72376e-22	-1.23572e-38	-2.1357e-52	6.53999e-08	-5.83226e-59	6.18483e-73	4.52361e-20
1835.24	2.06514e-05	1.33048e-07	6.85745e-84	3.64378e-21	-9.5579e-40	-1.02761e-53	1.33048e-07	-2.72093e-60	3.05652e-71	2.02943e-19
1835.88	2.46251e-05	2.61152e-07	3.63982e-82	1.33684e-20	-7.09761e-41	-4.74703e-55	2.61152e-07	-1.22312e-61	1.43886e-69	8.81456e-19
1836.52	2.54819e-05	4.9457e-07	1.85056e-80	4.80194e-20	-5.06024e-42	-2.10536e-56	4.9457e-07	-5.29779e-63	6.45212e-68	3.70652e-18
1837.17	2.56323e-05	9.0368e-07	9.01226e-79	1.68874e-19	-3.46369e-43	-8.96481e-58	9.0368e-07	-2.21102e-64	2.756e-66	1.50893e-17
1837.81	2.38919e-05	1.59313e-06	4.20408e-77	5.81459e-19	-2.27623e-44	-3.66492e-59	1.59313e-06	-8.89123e-66	1.12136e-64	5.94719e-17
1838.45	1.93557e-05	2.70983e-06	1.87852e-75	1.96013e-18	-1.43616e-45	-1.43846e-60	2.70983e-06	-3.44511e-67	4.34617e-63	2.2693e-16
1839.09	1.31451e-05	4.44715e-06	8.0402e-74	6.46933e-18	-8.69958e-47	-5.42048e-62	4.44715e-06	-1.28623e-68	1.60457e-61	8.38322e-16
1839.74	6.82863e-06	7.04165e-06	3.29629e-72	2.09047e-17	-5.05945e-48	-1.96105e-63	7.04165e-06	-4.62705e-70	5.64291e-60	2.99825e-15
1840.38	2.65285e-06	1.07577e-05	1.29447e-70	6.6136e-17	-2.82499e-49	-6.81158e-65	1.07577e-05	-1.60384e-71	1.89034e-58	1.03816e-14
1841.02	3.75454e-06	1.58567e-05	4.86925e-69	2.04852e-16	-1.5144e-50	-2.27152e-66	1.58567e-05	-5.35665e-73	6.03209e-57	3.48014e-14
1841.67	1.15643e-05	2.25506e-05	1.75445e-67	6.21232e-16	-7.7942e-52	-7.27268e-68	2.25506e-05	-1.72384e-74	1.83353e-55	1.12945e-13
1842.31	2.30908e-05	3.09425e-05	6.05518e-66	1.84449e-15	-3.85134e-53	-2.23554e-69	3.09425e-05	-5.34529e-76	5.30885e-54	3.54878e-13
1842.95	3.38228e-05	4.09642e-05	2.0018e-64	5.36177e-15	-1.8271e-54	-6.59747e-71	4.09642e-05	-1.59705e-77	1.46422e-52	1.07951e-12
1843.59	4.25979e-05	5.23244e-05	6.33898e-63	1.52598e-14	-8.32189e-56	-1.86932e-72	5.23244e-05	-4.59767e-79	3.84682e-51	3.17918e-12
1844.24	5.07872e-05	6.44846e-05	1.92276e-61	4.25206e-14	-3.63907e-57	-5.08507e-74	6.44846e-05	-1.27535e-80	9.627e-50	9.06442e-12
1844.88	5.81447e-05	7.6676e-05	5.58649e-60	1.16001e-13	-1.5278e-58	-1.32807e-75	7.66759e-05	-3.40874e-82	2.29494e-48	2.50209e-11
1845.52	6.21334e-05	8.79658e-05	1.55475e-58	3.09834e-13	-6.15821e-60	-3.33007e-77	8.79657e-05	-8.7787e-84	5.21129e-47	6.6866e-11
1846.17	6.08012e-05	9.73688e-05	4.14464e-57	8.10231e-13	-2.38314e-61	-8.01669e-79	9.73686e-05	-2.1784e-85	1.12722e-45	1.73e-10
1846.81	5.5247e-05	0.000103987	1.05833e-55	2.07442e-12	-8.85432e-63	-1.85287e-80	0.000103986	-5.20858e-87	2.32256e-44	4.33335e-10
1847.45	4.93972e-05	0.000107149	2.58858e-54	5.19991e-12	-3.15841e-64	-4.11155e-82	0.000107148	-1.19997e-88	4.55845e-43	1.05085e-09
1848.09	4.74685e-05	0.000106526	6.0647e-53	1.27615e-11	-1.08166e-65	-8.75941e-84	0.000106523	-2.66377e-90	8.52233e-42	2.46715e-09
1848.74	5.08914e-05	0.000102183	1.36102e-51	3.06634e-11	-3.55651e-67	-1.79165e-85	0.000102178	-5.69764e-92	1.51772e-40	5.60776e-09
1849.38	5.78031e-05	9.45747e-05	2.92567e-50	7.21351e-11	-1.1227e-68	-3.51836e-87	9.45623e-05	-1.17426e-93	2.57465e-39	1.23402e-08
1850.02	6.47947e-05	8.44633e-05	6.02413e-49	1.66143e-10	-3.40264e-70	-6.63341e-89	8.44368e-05	-2.33188e-95	4.1604e-38	2.629e-08
1850.66	7.0469e-05	7.27986e-05	1.18815e-47	3.74652e-10	-9.90092e-72	-1.20072e-90	7.2744e-05	-4.46191e-97	6.40391e-37	5.4225e-08
1851.31	7.493e-05	6.05755e-05	2.24467e-46	8.27147e-10	-2.76595e-73	-2.08668e-92	6.04664e-05	-8.22634e-99	9.3896e-36	1.0828e-07
1851.95	7.78982e-05	4.87044e-05	4.06202e-45	1.78792e-09	-7.4186e-75	-3.48161e-94	4.84933e-05	-1.46139e-100	1.31142e-34	2.0933e-07
1852.59	7.89299e-05	3.79189e-05	7.04105e-44	3.78374e-09	-1.91033e-76	-5.57716e-96	3.75233e-05	-2.50147e-102	1.74473e-33	3.91791e-07
1853.24	7.7764e-05	2.87316e-05	1.16907e-42	7.83979e-09	-4.72286e-78	-8.57739e-98	2.80138e-05	-4.12571e-104	2.21109e-32	7.09931e-07
1853.88	7.55253e-05	2.14401e-05	1.85931e-41	1.59037e-08	-1.12101e-79	-1.2665e-99	2.01788e-05	-6.55654e-106	2.66917e-31	1.24542e-06
1854.52	7.38489e-05	1.61707e-05	2.83248e-40	3.15864e-08	-2.55461e-81	-1.79542e-101	1.40239e-05	-1.00397e-107	3.06929e-30	2.11522e-06
1855.16	7.5532e-05	1.2943e-05	4.13325e-39	6.14202e-08	-5.58918e-83	-2.44363e-103	9.40357e-06	-1.4813e-109	3.36196e-29	3.47801e-06
1855.81	8.02763e-05	1.17373e-05	5.77726e-38	1.16932e-07	-1.17403e-84	-3.19311e-105	6.08372e-06	-2.10588e-111	3.50784e-28	5.53664e-06
1856.45	8.30857e-05	1.25484e-05	7.73499e-37	2.17953e-07	-2.36768e-86	-4.00592e-107	3.79749e-06	-2.88468e-113	3.48641e-27	8.53296e-06
1857.09	7.85583e-05	1.54166e-05	9.91982e-36	3.97744e-07	-4.5843e-88	-4.82502e-109	2.28705e-06	-3.80745e-115	3.30072e-26	1.27318e-05
1857.74	6.90368e-05	2.04313e-05	1.21858e-34	7.10646e-07	-8.52183e-90	-5.57962e-111	1.32894e-06	-4.8422e-117	2.97668e-25	1.83917e-05
1858.38	6.38787e-05	2.77093e-05	1.43388e-33	1.24312e-06	-1.5209e-91	-6.19469e-113	7.45054e-07	-5.93367e-119	2.5571e-24	2.57211e-05
1859.02	7.08842e-05	3.73574e-05	1.61614e-32	2.12903e-06	-2.60603e-93	-6.60303e-115	4.03015e-07	-7.01198e-121	2.09245e-23	3.48254e-05
1859.66	8.92335e-05	4.94302e-05	1.74482e-31	3.56993e-06	-4.28714e-95	-6.75736e-117	2.10332e-07	-5.711e-122	1.631e-22	4.565e-05
1860.31	0.000112254	6.38993e-05	1.80439e-30	5.86067e-06	-6.77117e-97	-6.63925e-119	1.05911e-07	-3.96651e-120	1.211e-21	5.79327e-05
1860.95	0.000133892	8.06492e-05	1.78737e-29	9.41985e-06	-1.02676e-98	-6.26283e-121	5.14551e-08	-3.08902e-118	8.56502e-21	7.11779e-05
1861.59	0.000151501	9.95128e-05	1.69593e-28	1.48235e-05	-1.4948e-100	-5.67193e-123	2.41194e-08	-2.32111e-116	5.77037e-20	8.46652e-05
1862.24	0.000163975	0.000120349	1.54137e-27	2.28385e-05	-2.08933e-102	-4.93175e-125	1.09083e-08	-1.68275e-114	3.70315e-19	9.74997e-05
1862.88	0.000171962	0.000143158	1.34188e-26	3.44502e-05	-2.80376e-104	-4.11699e-127	4.75991e-09	-1.17705e-112	2.26376e-18	0.000108703
1863.52	0.000179874	0.000168211	1.11899e-25	5.08777e-05	-3.61229e-106	-3.29965e-129	2.00397e-09	-7.94373e-111	1.31821e-17	0.000117331
1864.16	0.000193782	0.000196176	8.93816e-25	7.35651e-05	-4.46821e-108	-2.53901e-131	8.14021e-10	-5.17254e-109	7.31184e-17	0.00012261
1864.81	0.000217349	0.000228187	6.83873e-24	0.000104142	-5.30632e-110	-1.87573e-133	3.1903e-10	-3.24963e-107	3.86334e-16	0.000124045
1865.45	0.00024946	0.000265839	5.01198e-23	0.000144341	-6.0501e-112	-1.33041e-135	1.20636e-10	-1.96977e-105	1.94442e-15	0.000121498
1866.09	0.000288057	0.000311079	3.51844e-22	0.000195867	-6.62279e-114	-9.05962e-138	4.40125e-11	-1.15199e-103	9.32205e-15	0.000115212
1866.74	0.000334892	0.000365992	2.36591e-21	0.000260222	-6.96031e-116	-5.92302e-140	1.54927e-11	-6.50031e-102	4.25719e-14	0.00010577
1867.38	0.00039474	0.000432491	1.52389e-20	0.000338482	-7.02304e-118	-3.7178e-142	5.26171e-12	-3.53892e-100	1.85194e-13	9.40086e-05
1868.02	0.000471994	0.000511953	9.40188e-20	0.00043106	-6.80348e-120	-2.24046e-144	1.72417e-12	-1.85891e-98	7.67405e-13	8.0893e-05
1868.66	0.000566213	0.000604852	5.55627e-19	0.000537462	-6.3277e-122	-1.29628e-146	5.45108e-13	-9.42099e-97	3.0291e-12	6.73895e-05
1869.31	0.000672409	0.000710449	3.14528e-18	0.000656097	-5.65028e-124	-7.20065e-149	1.66279e-13	-4.60667e-95	1.13892e-11	5.43515e-05
1869.95	0.000784661	0.000826588	1.70546e-17	0.000784148	-4.84399e-126	-4.26392e-151	4.89378e-14	-2.17334e-93	4.07912e-11	4.24394e-05
1870.59	0.000900089	0.000949648	8.8579e-17	0.000917566	-3.987e-128	-3.39534e-150	1.38964e-14	-9.89285e-92	1.39165e-10	3.20823e-05
1871.23	0.00101936	0.00107468	4.40684e-16	0.0010512	-3.22588e-130	-2.64147e-148	3.80725e-15	-4.34476e-90	4.5226e-10	2.34801e-05
1871.88	0.00114385	0.00119572	2.10005e-15	0.00117908	-7.36376e-130	-1.99882e-146	1.0064e-15	-1.84103e-88	1.40003e-09	1.66369e-05
1872.52	0.00126948	0.00130624	9.58606e-15	0.00129483	-6.90726e-128	-1.47033e-144	2.56675e-16	-7.52677e-87	4.12837e-09	1.14126e-05
1873.16	0.00138605	0.00139975	4.19138e-14	0.00139216	-6.27157e-126	-1.05141e-142	6.31608e-17	-2.96898e-85	1.15961e-08	7.57939e-06
1873.81	0.00148056	0.00147037	1.75542e-13	0.00146547	-5.49411e-124	-7.30877e-141	1.49955e-17	-1.12994e-83	3.10268e-08	4.87329e-06
1874.45	0.0015414	0.00151344	7.04225e-13	0.00151033	-4.64376e-122	-4.93891e-139	3.43501e-18	-4.14914e-82	7.90778e-08	3.03353e-06
1875.09	0.00156321	0.00152599	2.70613e-12	0.00152397	-3.78699e-120	-3.24438e-137	7.59182e-19	-1.46998e-80	1.91984e-07	1.82815e-06
1875.73	0.00154549	0.00150705	9.96078e-12	0.00150554	-2.97968e-118	-2.0718e-135	1.61888e-19	-5.02475e-79	4.43983e-07	1.06663e-06
1876.38	0.0014913	0.00145777	3.51192e-11	0.00145619	-2.26202e-116	-1.28611e-133	3.3307e-20	-1.65718e-77	9.78047e-07	6.025e-07
1877.02	0.00140529	0.00138134	1.18605e-10	0.00137896	-1.65682e-114	-7.7611e-132	6.6116e-21	-5.27323e-76	2.05232e-06	3.29485e-07
1877.66	0.0012945	0.00128276	3.83679e-10	0.00127848	-1.17086e-112	-4.55285e-130	1.26628e-21	-1.61895e-74	4.10226e-06	1.74443e-07
1878.31	0.00116951	0.00116841	1.18889e-09	0.0011605	-7.98336e-111	-2.59632e-128	2.33994e-22	-4.79561e-73	7.81077e-06	8.94149e-08
1878.95	0.0010414	0.00104557	3.52874e-09	0.00103136	-5.25192e-109	-1.43928e-126	4.17186e-23	-1.37058e-71	1.41663e-05	4.43715e-08
1879.59	0.000917196	0.000921896	1.00324e-08	0.00089739	-3.33351e-107	-7.75622e-125	7.1764e-24	-3.77935e-70	2.44743e-05	2.13175e-08
1880.23	0.000801594	0.000804788	2.73211e-08	0.000764474	-2.04144e-105	-4.06321e-123	1.19106e-24	-1.0055e-68	4.02769e-05	9.91536e-09
1880.88	0.000700224	0.000700822	7.12685e-08	0.000637607	-1.20621e-103	-2.0692e-121	1.90728e-25	-2.58104e-67	6.31386e-05	4.46496e-09
1881.52	0.000620058	0.000615121	1.78076e-07	0.000520659	-6.8764e-102	-1.02435e-119	2.94677e-26	-6.39237e-66	9.42813e-05	1.94655e-09
1882.16	0.000562713	0.000550792	4.26204e-07	0.000416259	-3.78225e-100	-4.92961e-118	4.39267e-27	-1.52749e-64	0.000134106	8.21583e-10
1882.81	0.000524117	0.000508504	9.77098e-07	0.000325824	-2.0072e-98	-2.30616e-116	6.31775e-28	-3.52167e-63	0.000181703	3.35719e-10
1883.45	0.000499236	0.000486356	2.14568e-06	0.000249696	-1.02774e-96	-1.04877e-114	8.76694e-29	-7.83373e-62	0.000234514	1.32812e-10
1884.09	0.000485965	0.000480178	4.51336e-06	0.000187348	-5.07723e-95	-4.63651e-113	1.17377e-29	-1.68128e-60	0.000288316	5.08674e-11
1884.73	0.000481819	0.000484363	9.0937e-06	0.000137625	-2.42003e-93	-1.99262e-111	1.51626e-30	-3.48148e-59	0.000337644	1.88616e-11
1885.38	0.000482584	0.000493186	1.75505e-05	9.89818e-05	-1.11293e-91	-8.32571e-110	1.88978e-31	-6.95566e-58	0.000376654	6.77105e-12
1886.02	0.000485898	0.000502381	3.24447e-05	6.96986e-05	-4.93816e-90	-3.38328e-108	2.2725e-32	-1.3408e-56	0.000400238	2.35327e-12
1886.66	0.000495881	0.000510625	5.7452e-05	4.80517e-05	-2.11404e-88	-1.33922e-106	2.63661e-33	-2.49368e-55	0.000405122	7.9182e-13
1887.31	0.000519659	0.000520495	9.74482e-05	3.24359e-05	-8.732e-87	-5.19689e-105	2.95147e-34	-4.47476e-54	0.000390611	2.5794e-13
1887.95	0.00056242	0.000538519	0.000158325	2.14407e-05	-3.47989e-85	-2.02656e-103	3.18775e-35	-7.7473e-53	0.000358754	8.13485e-14
1888.59	0.00062548	0.000574143	0.000246395	1.38857e-05	-1.33804e-83	-8.62334e-102	3.32185e-36	-1.29414e-51	0.000313863	2.48381e-14
1889.23	0.000708871	0.00063769	0.0003673	8.82674e-06	-4.9639e-82	-4.7917e-100	3.33986e-37	-2.08576e-50	0.000261563	7.3422e-15
1889.88	0.000813649	0.000737644	0.000524466	5.54155e-06	-1.77676e-80	-3.92403e-98	3.23986e-38	-3.24339e-49	0.000207636	2.10122e-15
1890.52	0.000939517	0.000877848	0.000717333	3.50656e-06	-6.136e-79	-4.12342e-96	3.03234e-39	-4.86613e-48	0.000157009	5.82179e-16
1891.16	0.00108278	0.00105525	0.000939789	2.37218e-06	-2.04453e-77	-4.62777e-94	2.73829e-40	-7.04403e-47	0.000113093	1.56163e-16
1891.81	0.00123731	0.0012589	0.00117936	1.94312e-06	-6.57285e-76	-5.10322e-92	2.38579e-41	-9.83806e-46	7.7596e-05	4.05546e-17
1892.45	0.00139683	0.00147054	0.00141766	2.1674e-06	-2.03876e-74	-5.38715e-90	2.00557e-42	-1.32571e-44	5.07149e-05	1.01962e-17
1893.09	0.00155392	0.00166702	0.00163231	3.13504e-06	-6.10138e-73	-5.40427e-88	1.62664e-43	-1.72361e-43	3.15736e-05	2.48185e-18
1893.73	0.00169544	0.00182409	0.00180028	5.08419e-06	-1.76174e-71	-5.14158e-86	1.27292e-44	-2.16213e-42	1.87242e-05	5.8486e-19
1894.38	0.00180152	0.00192087	0.00190189	8.40834e-06	-4.90803e-70	-4.6365e-84	9.61078e-46	-2.61683e-41	1.05773e-05	1.33434e-19
1895.02	0.00185334	0.00194393	0.00192458	1.36547e-05	-1.31924e-68	-3.96229e-82	7.00114e-47	-3.05577e-40	5.69169e-06	2.94726e-20
1895.66	0.00184147	0.00188991	0.00186549	2.15005e-05	-3.42131e-67	-3.20881e-80	4.92074e-48	-3.44285e-39	2.91741e-06	6.30245e-21
1896.3	0.0017675	0.00176616	0.00173205	3.26939e-05	-8.56074e-66	-2.4625e-78	3.3369e-49	-3.74253e-38	1.42445e-06	1.30478e-21
1896.95	0.00164051	0.001589	0.00154039	4.79496e-05	-2.06672e-64	-1.79078e-76	2.18327e-50	-3.92523e-37	6.62503e-07	2.6152e-22
1897.59	0.00147347	0.00138032	0.00131223	6.77998e-05	-4.81398e-63	-1.23408e-74	1.37823e-51	-3.97206e-36	2.93509e-07	5.07471e-23
1898.23	0.00128217	0.00116331	0.00107077	9.24146e-05	-1.08188e-61	-8.05885e-73	8.3944e-53	-3.87809e-35	1.23864e-07	9.53356e-24
1898.88	0.00108551	0.000958403	0.00083693	0.000121423	-2.34586e-60	-4.98697e-71	4.93296e-54	-3.65318e-34	4.97926e-08	1.73395e-24
1899.52	0.000904197	0.0007804	0.000626598	0.000153783	-4.90771e-59	-2.92438e-69	2.7969e-55	-3.32029e-33	1.90679e-08	3.05322e-25
1900.16	0.000754754	0.000637107	0.000449361	0.000187739	-9.9062e-58	-1.62503e-67	1.53003e-56	-2.9116e-32	6.96241e-09	5.20495e-26
1900.8	0.000641738	0.000529607	0.00030868	0.000220924	-1.92924e-56	-8.55703e-66	8.07553e-58	-2.46343e-31	2.4577e-09	8.59041e-27
1901.45	0.000556676	0.000453705	0.000203109	0.000250595	-3.62507e-55	-4.26989e-64	4.1124e-59	-2.01094e-30	1.00005e-09	1.37262e-27
1902.09	0.000486705	0.000402009	0.000128014	0.000273994	-6.57201e-54	-2.01903e-62	2.02055e-60	-1.58383e-29	1.13995e-09	2.12336e-28
1902.73	0.0004228	0.000366057	7.72843e-05	0.000288769	-1.14956e-52	-9.04692e-61	9.57848e-62	-1.20357e-28	3.67272e-09	3.18006e-29
1903.38	0.000361633	0.000338066	4.46923e-05	0.000293361	-1.94006e-51	-3.84142e-59	4.38101e-63	-8.82436e-28	1.33429e-08	4.61091e-30
1904.02	0.00030354	0.000312073	2.47561e-05	0.000287272	-3.15902e-50	-1.54566e-57	1.93332e-64	-6.24234e-27	4.51012e-08	6.47254e-31
1904.66	0.000251699	0.000284434	1.31354e-05	0.000271159	-4.96294e-49	-5.89346e-56	8.2316e-66	-4.26053e-26	1.39544e-07	8.79634e-32
1905.3	0.000209731	0.000253787	6.67636e-06	0.000246716	-7.52277e-48	-2.12941e-54	3.38155e-67	-2.80563e-25	3.94698e-07	1.15736e-32
1905.95	0.000176583	0.000220648	3.25171e-06	0.000216376	-1.10019e-46	-7.29086e-53	1.34029e-68	-1.78258e-24	1.02049e-06	1.47425e-33
1906.59	0.000145678	0.000186853	1.52038e-06	0.000182921	-1.55242e-45	-2.36555e-51	5.12548e-70	-1.09274e-23	2.4118e-06	1.81808e-34
1907.23	0.000110449	0.000154958	6.89546e-07	0.000149058	-2.1135e-44	-7.27305e-50	1.89113e-71	-6.46309e-23	5.21026e-06	2.17067e-35
1907.88	7.33381e-05	0.000127692	3.20757e-07	0.000117082	-2.77617e-43	-2.11902e-48	6.73222e-73	-3.68818e-22	1.02887e-05	2.50907e-36
1908.52	4.31618e-05	0.000107411	1.92299e-07	8.86473e-05	-3.51837e-42	-5.85038e-47	2.31232e-74	-2.03066e-21	1.85717e-05	2.80782e-37
1909.16	2.77701e-05	9.55527e-05	2.13531e-07	6.46965e-05	-4.30218e-41	-1.53062e-45	7.6628e-76	-1.07873e-20	3.06426e-05	3.04204e-38
1909.8	2.6582e-05	9.21094e-05	3.80823e-07	4.55132e-05	-5.0756e-40	-3.79474e-44	2.45007e-77	-5.5289e-20	4.62154e-05	3.1908e-39
1910.45	3.28031e-05	9.53414e-05	7.65025e-07	3.08627e-05	-5.77746e-39	-8.91516e-43	7.55826e-79	-2.73412e-19	6.37137e-05	3.24019e-40
1911.09	3.9039e-05	0.000101986	1.52266e-06	2.0173e-05	-6.34509e-38	-1.98476e-41	2.24966e-80	-1.30451e-18	8.02907e-05	3.18553e-41
1911.73	4.19261e-05	0.000108122	2.92475e-06	1.27101e-05	-6.72342e-37	-4.18717e-40	6.46044e-82	-6.0052e-18	9.24876e-05	3.03201e-42
1912.38	4.12489e-05	0.000110499	5.39628e-06	7.71909e-06	-6.87376e-36	-8.37077e-39	1.79003e-83	-2.66722e-17	9.73839e-05	2.79394e-43
1913.02	3.81552e-05	0.000107804	9.55583e-06	4.51882e-06	-6.78031e-35	-1.58578e-37	4.78529e-85	-1.14299e-16	9.37297e-05	2.49254e-44
1913.66	3.45043e-05	0.00010125	1.62387e-05	2.54991e-06	-6.45291e-34	-2.84676e-36	1.23426e-86	-4.72583e-16	8.24618e-05	2.15281e-45
1914.3	3.27442e-05	9.4183e-05	2.64807e-05	1.38696e-06	-5.92535e-33	-4.84276e-35	3.07156e-88	-1.88523e-15	6.63153e-05	1.80015e-46
1914.95	3.71521e-05	9.09142e-05	4.14385e-05	7.27184e-07	-5.24956e-32	-7.8067e-34	7.37499e-90	-7.25608e-15	4.87485e-05	1.4573e-47
1915.59	5.19976e-05	9.53502e-05	6.22264e-05	3.67507e-07	-4.48729e-31	-1.19254e-32	1.70851e-91	-2.69458e-14	3.27563e-05	1.14216e-48
1916.23	7.82946e-05	0.000109967	8.96685e-05	1.7903e-07	-3.7008e-30	-1.72629e-31	3.84511e-93	-9.65454e-14	2.01193e-05	8.66649e-50
1916.87	0.000112791	0.000135374	0.000123994	8.40676e-08	-2.94482e-29	-2.36801e-30	1.68789e-93	-3.33752e-13	1.12958e-05	6.36647e-51
1917.52	0.000152929	0.000170369	0.000164534	3.80515e-08	-2.26086e-28	-3.07814e-29	9.38832e-92	-1.11318e-12	5.79707e-06	4.52785e-52
1918.16	0.000200021	0.000212247	0.000209511	1.66018e-08	-1.67471e-27	-3.79161e-28	5.27076e-90	-3.58229e-12	2.71948e-06	3.11763e-53
1918.8	0.000255872	0.00025718	0.000256007	6.98197e-09	-1.1969e-26	-4.42581e-27	2.84151e-88	-1.11226e-11	1.16613e-06	2.07823e-54
1919.45	0.00031537	0.000300648	0.000300188	2.83036e-09	-8.25328e-26	-4.89546e-26	1.47146e-86	-3.332e-11	4.57083e-07	1.34123e-55
1920.09	0.000365714	0.000337941	0.000337777	1.10598e-09	-5.49094e-25	-5.1313e-25	7.32588e-85	-9.6306e-11	1.63768e-07	8.3801e-57
1920.73	0.000395685	0.000364775	0.000364721	4.16574e-10	-3.52467e-24	-5.09674e-24	3.51506e-83	-2.68567e-10	5.36351e-08	5.06914e-58
1921.37	0.000404367	0.000377925	0.000377909	1.51244e-10	-2.18294e-23	-4.79724e-23	1.63568e-81	-7.22611e-10	1.60566e-08	2.96864e-59
1922.02	0.000399897	0.000375762	0.000375759	5.29303e-11	-1.30442e-22	-4.2788e-22	7.49631e-80	-1.87589e-09	4.39386e-09	1.68314e-60
1922.66	0.000389111	0.000358527	0.000358531	1.78555e-11	-7.52041e-22	-3.61647e-21	3.4995e-78	-4.69853e-09	1.09907e-09	9.23889e-62
1923.3	0.000370058	0.000328264	0.000328275	5.80603e-12	-4.1833e-21	-2.89655e-20	1.76387e-76	-1.13545e-08	2.51297e-10	4.90974e-63
1923.95	0.000337542	0.000288407	0.000288433	1.81981e-12	-2.24516e-20	-2.19841e-19	1.02053e-74	-2.64743e-08	5.25213e-11	2.52601e-64
1924.59	0.000292063	0.000243132	0.000243191	5.49814e-13	-1.16259e-19	-1.58113e-18	6.84304e-73	-5.9557e-08	1.00339e-11	1.2582e-65
1925.23	0.000242864	0.000196635	0.000196764	1.6012e-13	-5.80843e-19	-1.07761e-17	5.03148e-71	-1.29268e-07	1.75223e-12	6.06741e-67
1925.87	0.000198946	0.000152499	0.00015277	4.49484e-14	-2.79989e-18	-6.95963e-17	3.78761e-69	-2.70709e-07	2.79703e-13	2.83266e-68
1926.52	0.000162348	0.000113275	0.000113822	1.21625e-14	-1.30219e-17	-4.25935e-16	2.78881e-67	-5.46973e-07	4.08122e-14	1.28034e-69
1927.16	0.000128063	8.03121e-05	8.13784e-05	3.17231e-15	-5.84333e-17	-2.47021e-15	1.96254e-65	-1.0663e-06	5.44337e-15	5.60265e-71
1927.8	9.07913e-05	5.3827e-05	5.58326e-05	7.97566e-16	-2.52987e-16	-1.35755e-14	1.3063e-63	-2.0056e-06	6.63639e-16	2.37356e-72
1928.45	5.02206e-05	3.31191e-05	3.67588e-05	1.93285e-16	-1.05678e-15	-7.06986e-14	8.18712e-62	-3.63966e-06	7.39574e-17	9.7352e-74
1929.09	1.07812e-05	1.68508e-05	2.32236e-05	4.51514e-17	-4.25917e-15	-3.48898e-13	4.82219e-60	-6.37279e-06	7.53385e-18	3.8657e-75
1929.73	-2.25046e-05	3.31384e-06	1.40797e-05	1.01668e-17	-1.65621e-14	-1.63161e-12	2.66694e-58	-1.07659e-05	7.01518e-19	1.48611e-76
1930.37	-4.6909e-05	-9.35638e-06	8.19129e-06	2.20667e-18	-6.21381e-14	-7.23052e-12	1.38445e-56	-1.75477e-05	5.97098e-20	5.53107e-78
1931.02	-6.25093e-05	-2.30227e-05	4.57305e-06	4.6167e-19	-2.24932e-13	-3.03636e-11	6.74471e-55	-2.75957e-05	4.64557e-21	1.993e-79
1931.66	-7.24044e-05	-3.94213e-05	2.44994e-06	9.31035e-20	-7.85591e-13	-1.20829e-10	3.08346e-53	-4.18711e-05	3.30383e-22	6.95255e-81
1932.3	-8.25463e-05	-6.0038e-05	1.25951e-06	1.80984e-20	-2.64724e-12	-4.55638e-10	1.32277e-51	-6.12971e-05	2.14775e-23	2.34811e-82
1932.95	-9.85744e-05	-8.59599e-05	6.21355e-07	3.39123e-21	-8.60678e-12	-1.62818e-09	5.32473e-50	-8.65796e-05	1.27624e-24	7.67772e-84
1933.59	-0.000122101	-0.000117701	2.94154e-07	6.1251e-22	-2.69985e-11	-5.51335e-09	2.01128e-48	-0.000117989	6.93218e-26	2.43043e-85
1934.23	-0.000150413	-0.000155024	1.3363e-07	1.06637e-22	-8.17129e-11	-1.76914e-08	7.12863e-47	-0.000155139	3.44185e-27	7.44858e-87
1934.87	-0.000179807	-0.000196808	5.82545e-08	1.78956e-23	-2.38612e-10	-5.37949e-08	2.37083e-45	-0.000196812	1.56207e-28	2.21005e-88
1935.52	-0.000209682	-0.00024103	2.43697e-08	2.89484e-24	-6.72273e-10	-1.55007e-07	7.39863e-44	-0.000240899	6.48029e-30	6.34846e-90
1936.16	-0.000241684	-0.000284905	9.78285e-09	4.51381e-25	-1.82747e-09	-4.23249e-07	2.16651e-42	-0.00028449	2.45739e-31	1.76552e-91
1936.8	-0.000276106	-0.00032525	3.76856e-09	6.78426e-26	-4.79299e-09	-1.09515e-06	5.95292e-41	-0.000324154	8.51804e-33	4.75353e-93
1937.44	-0.000308612	-0.000359055	1.3931e-09	9.82883e-27	-1.21287e-08	-2.68522e-06	1.53482e-39	-0.000356359	2.69893e-34	1.23907e-94
1938.09	-0.000333479	-0.000384253	4.94177e-10	1.37259e-27	-2.96123e-08	-6.23909e-06	3.71313e-38	-0.000377985	7.81679e-36	3.12692e-96
1938.73	-0.000350161	-0.00040063	1.6822e-10	1.84766e-28	-6.97561e-08	-1.37371e-05	8.42914e-37	-0.000386824	2.06943e-37	7.63968e-98
1939.37	-0.000365331	-0.000410767	5.49503e-11	2.39742e-29	-1.58542e-07	-2.86616e-05	1.79549e-35	-0.000381947	5.00796e-39	1.80706e-99
1940.02	-0.000388218	-0.000420884	1.72249e-11	2.99851e-30	-3.47662e-07	-5.6668e-05	3.58874e-34	-0.000363868	1.10778e-40	4.13815e-101
1940.66	-0.000426679	-0.000441362	5.18129e-12	3.615e-31	-7.35565e-07	-0.000106172	6.73068e-33	-0.000334454	2.23994e-42	9.17443e-103
1941.3	-0.000490603	-0.000486608	1.4956e-12	4.20098e-32	-1.50154e-06	-0.0001885	1.1845e-31	-0.000296607	4.14002e-44	1.9692e-104
1941.94	-0.000595509	-0.000573886	4.14273e-13	4.70581e-33	-2.95736e-06	-0.000317137	1.95599e-30	-0.000253791	6.99447e-46	4.09204e-106
1942.59	-0.000760563	-0.000720748	1.10117e-13	5.0811e-34	-5.61981e-06	-0.000505609	3.03079e-29	-0.000209519	1.08017e-47	8.23243e-108
1943.23	-0.0010039	-0.000941052	2.80877e-14	5.28838e-35	-1.03037e-05	-0.000763862	4.40661e-28	-0.000166887	1.52481e-49	1.60345e-109
1943.87	-0.00133757	-0.00124005	6.87502e-15	5.30555e-36	-1.82269e-05	-0.00109357	6.0119e-27	-0.000128254	1.96755e-51	3.02356e-111
1944.52	-0.00175939	-0.00160979	1.61483e-15	5.13238e-37	-3.11089e-05	-0.00148359	7.69619e-26	-9.50981e-05	2.32072e-53	5.51978e-113
1945.16	-0.00224063	-0.00202652	3.63977e-16	4.86786e-38	-5.12282e-05	-0.00190726	9.24482e-25	-6.80338e-05	2.5021e-55	9.7558e-115
1945.8	-0.00272085	-0.00245183	7.87258e-17	8.44585e-39	-8.13925e-05	-0.00232348	1.04203e-23	-4.69603e-05	2.46588e-57	1.66933e-116
1946.44	-0.00312068	-0.0028383	1.63401e-17	2.02383e-38	-0.00012477	-0.00268227	1.10209e-22	-3.12749e-05	2.22139e-59	2.76541e-118
1947.09	-0.00337118	-0.00313886	3.25453e-18	9.37087e-38	-0.000184539	-0.00293425	1.09374e-21	-2.00977e-05	1.82921e-61	4.43523e-120
1947.73	-0.00344179	-0.0033175	6.22038e-19	4.34986e-37	-0.000263341	-0.00304175	1.01852e-20	-1.24652e-05	1.37686e-63	6.8867e-122
1948.37	-0.00334928	-0.00335795	1.14088e-19	1.98896e-36	-0.000362576	-0.00298802	8.89982e-20	-7.4705e-06	9.47325e-66	1.03525e-123
1949.02	-0.00314335	-0.00326724	2.00798e-20	8.95555e-36	-0.000481649	-0.00278147	7.29712e-19	-4.34694e-06	5.95793e-68	1.50666e-125
1949.66	-0.00288417	-0.00307297	3.39136e-21	3.97076e-35	-0.000617326	-0.00245358	5.6141e-18	-2.50367e-06	3.42514e-70	2.12287e-127
1950.3	-0.0026234	-0.00281508	5.49645e-22	1.73369e-34	-0.000763395	-0.00205096	4.05291e-17	-1.52978e-06	1.79989e-72	2.89582e-129
1950.94	-0.00239481	-0.0025352	8.54844e-23	7.45388e-34	-0.000910826	-0.0016246	2.74543e-16	-1.18233e-06	8.6457e-75	3.82435e-131
1951.59	-0.00220863	-0.00226698	1.27581e-23	3.15579e-33	-0.00104851	-0.00121947	1.74507e-15	-1.37083e-06	3.79612e-77	4.8897e-133
1952.23	-0.00205593	-0.00203031	1.82718e-24	1.31568e-32	-0.00116456	-0.000867428	1.04082e-14	-2.14363e-06	1.52358e-79	6.05265e-135
1952.87	-0.00191926	-0.00183042	2.51114e-25	5.4014e-32	-0.00124796	-0.000584721	5.82496e-14	-3.67444e-06	5.58955e-82	7.25348e-137
1953.52	-0.00178246	-0.00166125	3.31174e-26	2.18362e-31	-0.00129031	-0.000373561	3.05893e-13	-6.24066e-06	1.87445e-84	8.41561e-139
1954.16	-0.0016353	-0.00151095	4.19118e-27	8.69288e-31	-0.00128717	-0.000226273	1.50731e-12	-1.0181e-05	5.74589e-87	9.45286e-141
1954.8	-0.00147258	-0.00136741	5.08992e-28	3.40773e-30	-0.00123889	-0.000130114	6.96941e-12	-1.58224e-05	1.61e-89	1.02797e-142
1955.44	-0.00129539	-0.00122224	5.93174e-29	1.31547e-29	-0.00115048	-7.13603e-05	3.02375e-11	-2.33743e-05	4.12365e-92	1.08226e-144
1956.09	-0.00111041	-0.00107247	6.63357e-30	5.00048e-29	-0.0010308	-3.79577e-05	1.23099e-10	-3.28053e-05	9.65433e-95	1.10313e-146
1956.73	-0.000926623	-0.000920171	7.11882e-31	1.87179e-28	-0.000891093	-2.07236e-05	4.70242e-10	-4.37343e-05	2.06609e-97	1.08857e-148
1957.37	-0.000753412	-0.00077079	7.33102e-32	6.8995e-28	-0.00074323	-1.34837e-05	1.68557e-09	-5.53807e-05	4.04167e-100	1.03998e-150
1958.02	-0.00059899	-0.000631046	7.24463e-33	2.50434e-27	-0.000598101	-1.26322e-05	5.66929e-09	-6.66111e-05	7.22702e-103	9.61909e-153
1958.66	-0.000470246	-0.000507162	6.87053e-34	8.95125e-27	-0.000464384	-1.65106e-05	1.78924e-08	-7.61001e-05	1.18125e-105	8.61351e-155
1959.3	-0.000371964	-0.000403785	6.27e-35	3.15057e-26	-0.000347881	-2.48404e-05	5.29868e-08	-8.25799e-05	1.76487e-108	7.46731e-157
1959.94	-0.000306741	-0.000323656	6.1808e-36	1.09197e-25	-0.000251442	-3.82914e-05	1.47239e-07	-8.51166e-05	2.41029e-111	6.26739e-159
1960.59	-0.000273418	-0.000267857	3.27853e-36	3.72687e-25	-0.000175346	-5.81757e-05	3.83918e-07	-8.33306e-05	3.00892e-114	5.09269e-161
1961.23	-0.000266269	-0.000236298	1.09307e-35	1.25255e-24	-0.00011798	-8.62106e-05	9.39314e-07	-7.74899e-05	3.4335e-117	4.00633e-163
1961.87	-0.000275342	-0.00022816	4.15497e-35	4.14533e-24	-7.65937e-05	-0.000124291	2.15646e-06	-6.84441e-05	3.58138e-120	3.0513e-165
1962.51	-0.00029222	-0.000242109	1.56485e-34	1.35095e-23	-4.79839e-05	-0.000174226	4.64548e-06	-5.74218e-05	3.41468e-123	2.24988e-167
1963.16	-0.00031073	-0.000276208	5.82083e-34	4.33545e-23	-2.90206e-05	-0.00023742	9.39024e-06	-4.57582e-05	2.97601e-126	1.60611e-169
1963.8	-0.00032476	-0.000327648	2.13835e-33	1.37007e-22	-1.69726e-05	-0.000314516	1.78107e-05	-3.46346e-05	2.37086e-129	1.11001e-171
1964.44	-0.000329481	-0.000392474	7.75802e-33	4.26352e-22	-9.6593e-06	-0.000405025	3.1699e-05	-2.49002e-05	1.72648e-132	7.42707e-174
1965.09	-0.000327257	-0.000465537	2.77974e-32	1.30649e-21	-5.47354e-06	-0.000507032	5.29379e-05	-1.70038e-05	1.14922e-135	4.81112e-176
1965.73	-0.000330371	-0.000540843	9.8364e-32	3.94241e-21	-3.32797e-06	-0.000617028	8.29561e-05	-1.10291e-05	6.9925e-139	3.01727e-178
1966.37	-0.000353769	-0.000612322	3.43755e-31	1.17147e-20	-2.5723e-06	-0.000729942	0.00012198	-6.79488e-06	3.88908e-142	1.83198e-180
1967.01	-0.0004067	-0.000674847	1.18643e-30	3.4278e-20	-2.91267e-06	-0.000839434	0.000168304	-3.97626e-06	1.97718e-145	1.07687e-182
1967.66	-0.000489836	-0.000725151	4.04402e-30	9.87675e-20	-4.34988e-06	-0.000938425	0.000217903	-2.21014e-06	9.18823e-149	6.12838e-185
1968.3	-0.00059409	-0.000762273	1.36134e-29	2.80239e-19	-7.13927e-06	-0.00101983	0.000264734	-1.16685e-06	3.90304e-152	3.3765e-187
1968.94	-0.000699413	-0.000787276	4.52582e-29	7.82991e-19	-1.17643e-05	-0.00107738	0.000301822	-5.85138e-07	1.51552e-155	1.80105e-189
1969.59	-0.000781576	-0.000802339	1.48596e-28	2.15427e-18	-1.89087e-05	-0.00110644	0.000322944	-2.7871e-07	5.37903e-159	9.30086e-192
1970.23	-0.0008243	-0.000809579	4.81837e-28	5.83659e-18	-2.94076e-05	-0.00110458	0.00032436	-1.26095e-07	1.74515e-162	4.65006e-194
1970.87	-0.000825622	-0.000810152	1.54302e-27	1.55716e-17	-4.41609e-05	-0.00107197	0.00030595	-5.41869e-08	5.17545e-166	2.25078e-196
1971.51	-0.000792322	-0.00080399	4.88003e-27	4.09092e-17	-6.39961e-05	-0.00101131	0.000271298	-2.21177e-08	1.40297e-169	1.05474e-198
1972.16	-0.000733121	-0.000790241	1.52424e-26	1.05834e-16	-8.94837e-05	-0.000927472	0.000226703	-8.57506e-09	3.47644e-173	4.78515e-201
1972.8	-0.000658626	-0.00076806	4.7018e-26	2.69614e-16	-0.000120723	-0.000826858	0.000179516	-3.15779e-09	7.87422e-177	2.10177e-203
1973.44	-0.000581413	-0.000737297	1.43237e-25	6.76357e-16	-0.000157142	-0.000716598	0.00013644	-1.10454e-09	1.63029e-180	8.93741e-206
1974.09	-0.000511288	-0.000698726	4.30948e-25	1.6708e-15	-0.000197353	-0.00060372	0.000102345	-3.66968e-10	3.08539e-184	3.6794e-208
1974.73	-0.000451642	-0.00065373	1.28049e-24	4.06431e-15	-0.000239137	-0.000494435	7.98421e-05	-1.15805e-10	5.33752e-188	1.4665e-210
1975.37	-0.000402888	-0.000603708	3.75755e-24	9.73565e-15	-0.000279577	-0.000393639	6.95082e-05	-3.47116e-11	8.44025e-192	5.65879e-213
1976.01	-0.000367876	-0.00054955	1.08897e-23	2.29645e-14	-0.000315361	-0.000304651	7.04616e-05	-9.88264e-12	1.21999e-195	2.11399e-215
1976.66	-0.000348836	-0.000491466	3.11677e-23	5.33415e-14	-0.000343215	-0.000229203	8.09516e-05	-2.67253e-12	1.61192e-199	7.64579e-218
1977.3	-0.000341717	-0.000429255	8.80997e-23	1.22008e-13	-0.000360392	-0.000167631	9.87678e-05	-6.8647e-13	1.94678e-203	2.67719e-220
1977.94	-0.000336381	-0.000362863	2.45937e-22	2.74805e-13	-0.00036512	-0.000119179	0.000121436	-1.67483e-13	2.1492e-207	9.0756e-223
1978.59	-0.000322807	-0.000292978	6.78037e-22	6.09505e-13	-0.000356901	-8.23689e-05	0.000146291	-3.88124e-14	2.16881e-211	2.97858e-225
1979.23	-0.000298131	-0.000221392	1.84613e-21	1.3312e-12	-0.000336597	-5.53401e-05	0.000170546	-8.54321e-15	2.00056e-215	9.46414e-228
1979.87	-0.000265825	-0.000150977	4.96422e-21	2.86304e-12	-0.000306285	-3.61436e-05	0.000191452	-1.78617e-15	1.68682e-219	2.91133e-230
1980.51	-0.000230875	-8.52855e-05	1.31832e-20	6.06351e-12	-0.0002689	-2.29476e-05	0.000206562	-3.54709e-16	1.30008e-223	8.67042e-233
1981.16	-0.000195281	-2.78886e-05	3.45755e-20	1.26455e-11	-0.000227776	-1.41631e-05	0.000214051	-6.69074e-17	9.1593e-228	2.49993e-235
1981.8	-0.000159079	1.83308e-05	8.95564e-20	2.59695e-11	-0.000186156	-8.49756e-06	0.000212984	-1.19874e-17	5.89884e-232	6.97835e-238
1982.44	-0.000122484	5.17267e-05	2.29089e-19	5.25176e-11	-0.00014679	-4.95615e-06	0.000203473	-2.03999e-18	3.47536e-236	1.88589e-240
1983.08	-8.86533e-05	7.21418e-05	5.78752e-19	1.04583e-10	-0.000111678	-2.81002e-06	0.00018663	-3.29747e-19	1.89069e-240	4.93422e-243
1983.73	-6.18788e-05	8.08234e-05	1.44398e-18	2.05084e-10	-8.19769e-05	-1.54878e-06	0.000164349	-5.06271e-20	1.06636e-244	1.24985e-245
1984.37	-4.47615e-05	8.00632e-05	3.55802e-18	3.96022e-10	-5.80585e-05	-8.29819e-07	0.000138951	-7.38306e-21	1.33683e-248	3.06505e-248
1985.01	-3.56335e-05	7.26849e-05	8.65837e-18	7.53044e-10	-3.96726e-05	-4.32207e-07	0.000112789	-1.02268e-21	5.68152e-252	7.27703e-251
1985.66	-3.18915e-05	6.15251e-05	2.08086e-17	1.41006e-09	-2.61558e-05	-2.18834e-07	8.78983e-05	-1.34553e-22	3.13922e-255	1.67267e-253
1986.3	-3.2199e-05	4.90234e-05	4.9389e-17	2.59997e-09	-1.66378e-05	-1.0771e-07	6.57663e-05	-1.6815e-23	1.69643e-258	3.72223e-256
1986.94	-3.46347e-05	3.69848e-05	1.1577e-16	4.72078e-09	-1.02112e-05	-5.15355e-08	4.72428e-05	-1.99596e-24	8.74821e-262	8.01927e-259
1987.58	-3.40623e-05	2.65198e-05	2.68006e-16	8.44063e-09	-6.04654e-06	-2.39704e-08	3.25819e-05	-2.25039e-25	4.29776e-265	1.67265e-261
1988.23	-2.60346e-05	1.81233e-05	6.12732e-16	1.48611e-08	-3.45453e-06	-1.08382e-08	2.15738e-05	-2.40997e-26	2.01123e-268	3.37764e-264
1988.87	-1.2706e-05	1.18314e-05	1.38349e-15	2.57657e-08	-1.90425e-06	-4.7638e-09	1.37147e-05	-2.45142e-27	8.96545e-272	6.60329e-267
1989.51	-1.67307e-06	7.39975e-06	3.08506e-15	4.39893e-08	-1.01276e-06	-2.03547e-09	8.37056e-06	-2.3685e-28	3.80693e-275	1.24982e-269
1990.16	2.02282e-06	4.45834e-06	6.79407e-15	7.39551e-08	-5.19691e-07	-8.45457e-10	4.90492e-06	-2.1736e-29	1.53982e-278	2.29018e-272
1990.8	-5.61279e-07	2.62422e-06	1.47766e-14	1.22434e-07	-2.57296e-07	-3.41375e-10	2.75943e-06	-1.89468e-30	5.93276e-282	4.06285e-275
1991.44	-5.29128e-06	1.567e-06	3.17396e-14	1.99597e-07	-1.22906e-07	-1.33995e-10	1.49044e-06	-1.56871e-31	2.17739e-285	6.978e-278
1992.08	-9.89944e-06	1.03662e-06	6.73298e-14	3.2042e-07	-5.66452e-08	-5.11279e-11	7.72894e-07	-1.23368e-32	7.61215e-289	1.1603e-280
1992.73	-1.38391e-05	8.66115e-07	1.41056e-13	5.06523e-07	-2.51887e-08	-1.89646e-11	3.84799e-07	-9.21528e-34	2.53496e-292	1.86787e-283
1993.37	-1.62769e-05	9.61605e-07	2.91849e-13	7.88487e-07	-1.08068e-08	-6.83821e-12	1.83932e-07	-6.53833e-35	8.0413e-296	2.91113e-286
1994.01	-1.64835e-05	1.28859e-06	5.96352e-13	1.20866e-06	-4.47346e-09	-2.39694e-12	8.44091e-08	-4.40631e-36	2.42982e-299	4.39253e-289
1994.66	-1.56633e-05	1.85984e-06	1.20345e-12	1.82444e-06	-1.78665e-09	-8.16743e-13	3.71904e-08	-2.82055e-37	6.99381e-303	6.41663e-292
1995.3	-1.77586e-05	2.72692e-06	2.39846e-12	2.71187e-06	-6.88473e-10	-2.70539e-13	1.57319e-08	-1.71492e-38	1.91755e-306	9.0748e-295
1995.94	-2.35341e-05	3.97553e-06	4.72082e-12	3.96939e-06	-2.55968e-10	-8.71139e-14	6.38912e-09	-9.90381e-40	--	1.24253e-297
1996.58	-2.81666e-05	5.72369e-06	9.1766e-12	5.72128e-06	-9.18197e-11	-2.72684e-14	2.49121e-09	-5.43265e-41	--	1.64707e-300
1997.23	-2.36476e-05	8.12133e-06	1.76168e-11	8.12041e-06	-3.17788e-11	-8.29751e-15	9.32583e-10	-2.83056e-42	--	2.11377e-303
1997.87	-8.58109e-06	1.13499e-05	3.34003e-11	1.13495e-05	-1.06118e-11	-2.45443e-15	3.35177e-10	-1.40082e-43	--	2.62628e-306
1998.51	1.02518e-05	1.56206e-05	6.25394e-11	1.56204e-05	-3.41897e-12	-7.05776e-16	1.15657e-10	-6.58481e-45	0	--
1999.16	2.39989e-05	2.11701e-05	1.15648e-10	2.117e-05	-1.0628e-12	-1.97287e-16	3.83156e-11	-2.94005e-46	0	--
1999.8	2.90531e-05	2.82532e-05	2.11204e-10	2.8253e-05	-3.18756e-13	-5.36099e-17	1.21868e-11	-1.24686e-47	0	--
2000.44	2.97609e-05	3.71303e-05	3.8093e-10	3.71299e-05	-9.22394e-14	-1.41614e-17	3.72147e-12	-5.02259e-49	0	--
2001.08	3.30429e-05	4.80512e-05	6.78528e-10	4.80505e-05	-2.57529e-14	-3.63648e-18	1.09106e-12	-1.92172e-50	0	--
2001.73	4.3864e-05	6.12343e-05	1.19363e-09	6.12331e-05	-6.93726e-15	-9.0776e-19	3.07106e-13	-6.98398e-52	0	--
2002.37	6.39519e-05	7.68426e-05	2.07374e-09	7.68405e-05	-1.80302e-15	-2.20281e-19	8.29926e-14	-2.41083e-53	0	0
2003.01	9.2419e-05	9.49566e-05	3.55809e-09	9.4953e-05	-4.52131e-16	-5.19632e-20	2.15327e-14	-7.90459e-55	0	0
2003.65	0.00012605	0.000115549	6.02919e-09	0.000115543	-1.09391e-16	-1.1916e-20	5.36375e-15	-2.46174e-56	0	0
2004.3	0.000158048	0.000138459	1.00898e-08	0.000138449	-2.55356e-17	-2.65631e-21	1.28276e-15	-7.2821e-58	0	0
2004.94	0.000182888	0.00016338	1.66757e-08	0.000163363	-5.75128e-18	-5.75628e-22	2.94533e-16	-2.04607e-59	0	0
2005.58	0.000200875	0.000189843	2.72186e-08	0.000189816	-1.24978e-18	-1.21261e-22	6.49277e-17	-5.46054e-61	0	0
2006.23	0.000218688	0.000217227	4.38761e-08	0.000217183	-2.62032e-19	-2.48321e-23	1.37416e-17	-1.38421e-62	0	0
2006.87	0.000242089	0.000244769	6.98505e-08	0.0002447	-5.30063e-20	-4.94334e-24	2.79223e-18	-3.33285e-64	0	0
2007.51	0.000270335	0.000271601	1.09822e-07	0.000271491	-1.03455e-20	-9.56628e-25	5.44721e-19	-7.62223e-66	0	0
2008.15	0.000297745	0.000296786	1.70527e-07	0.000296616	-1.94817e-21	-1.79962e-25	1.02025e-19	-1.65576e-67	0	0
2008.8	0.000319196	0.000319376	2.61501e-07	0.000319115	-3.53959e-22	-3.29103e-26	1.83463e-20	-3.41637e-69	0	0
2009.44	0.000333395	0.000338472	3.96036e-07	0.000338076	-6.20483e-23	-5.85056e-27	3.16738e-21	-6.69547e-71	0	0
2010.08	0.000341555	0.000353285	5.92346e-07	0.000352693	-1.04944e-23	-1.01106e-27	5.25002e-22	-1.24637e-72	0	0
2010.73	0.000344977	0.000363197	8.74976e-07	0.000362322	-1.71254e-24	-1.69853e-28	8.35469e-23	-2.20377e-74	0	0
2011.37	0.000344776	0.000367804	1.27643e-06	0.000366528	-2.69632e-25	-2.77386e-29	1.27646e-23	-3.70113e-76	0	0
2012.01	0.000343297	0.000366957	1.83898e-06	0.000365118	-4.09595e-26	-4.40361e-30	1.87239e-24	-5.90408e-78	0	0
2012.65	0.000342315	0.000360776	2.6166e-06	0.000358159	-6.00329e-27	-6.79592e-31	2.6369e-25	-8.94583e-80	0	0
2013.3	0.000339993	0.000349642	3.67686e-06	0.000345966	-8.48937e-28	-1.01954e-31	3.56532e-26	-1.28748e-81	0	0
2013.94	0.000333225	0.000334185	5.10266e-06	0.000329083	-1.15828e-28	-1.48686e-32	4.62822e-27	-1.75998e-83	0	0
2014.58	0.000322575	0.000315235	6.99353e-06	0.000308242	-1.52476e-29	-2.10792e-33	5.76817e-28	-2.28522e-85	0	0
2015.23	0.000312404	0.000293777	9.4662e-06	0.000284311	-1.93661e-30	-2.90505e-34	6.90194e-29	-2.81837e-87	0	0
2015.87	0.000302947	0.000270886	1.26542e-05	0.000258232	-2.37319e-31	-3.89194e-35	7.92891e-30	-3.30156e-89	0	0
2016.51	0.000287602	0.000247669	1.67061e-05	0.000230963	-2.80592e-32	-5.06866e-36	8.7451e-31	-3.67358e-91	0	0
2017.15	0.000261091	0.000225199	2.17818e-05	0.000203417	-3.20089e-33	-6.41705e-37	9.26031e-32	-3.88249e-93	0	0
2017.8	0.000227361	0.000204468	2.80474e-05	0.000176421	-3.52303e-34	-7.89755e-38	9.41446e-33	-3.89746e-95	0	0
2018.44	0.000196094	0.000186337	3.56673e-05	0.00015067	-3.74122e-35	-9.44853e-39	9.18912e-34	-3.71624e-97	0	0
2019.08	0.000174513	0.000171507	4.47949e-05	0.000126712	-3.8332e-36	-1.09888e-39	8.61117e-35	-3.3657e-99	0	0
2019.73	0.000164562	0.000160496	5.55607e-05	0.000104936	-3.78932e-37	-1.24237e-40	7.74745e-36	-2.89533e-101	0	0
2020.37	0.000164468	0.000153633	6.8059e-05	8.55744e-05	-3.6142e-38	-1.36542e-41	6.69214e-37	-2.36576e-103	0	0
2021.01	0.000171301	0.000151054	8.23348e-05	6.87194e-05	-3.32594e-39	-1.45881e-42	5.54984e-38	-1.83609e-105	0	0
2021.65	0.000180708	0.000152711	9.83696e-05	5.43413e-05	-2.95303e-40	-1.51571e-43	4.41881e-39	-1.35353e-107	0	0
2022.3	0.000188769	0.000158385	0.00011607	4.23151e-05	-2.52973e-41	-1.59793e-44	3.37783e-40	-9.47744e-110	0	0
2022.94	0.000194934	0.000167703	0.000135256	3.24471e-05	-2.09088e-42	-8.89327e-45	2.47903e-41	-6.30326e-112	0	0
2023.58	0.0002021	0.000180159	0.000155659	2.45003e-05	-1.66739e-43	-7.78544e-44	1.74676e-42	-3.98189e-114	0	0
2024.23	0.00021374	0.000195135	0.000176917	1.82172e-05	-1.28291e-44	-7.93021e-43	1.18166e-43	-2.38927e-116	0	0
2024.87	0.000230635	0.000211924	0.000198585	1.33385e-05	-9.52375e-46	-7.85491e-42	7.67474e-45	-1.36173e-118	0	0
2025.51	0.000250402	0.00022976	0.000220143	9.61718e-06	-6.82135e-47	-7.55221e-41	4.78567e-46	-7.37166e-121	0	0
2026.15	0.00027051	0.000247841	0.000241013	6.82814e-06	-4.71394e-48	-7.04817e-40	2.86504e-47	-3.79045e-123	0	0
2026.8	0.000290254	0.000265363	0.00026059	4.77389e-06	-3.14303e-49	-6.38481e-39	1.64675e-48	-1.85126e-125	0	0
2027.44	0.000311133	0.000281548	0.000278262	3.28668e-06	-2.02192e-50	-5.61421e-38	9.08863e-50	-8.58804e-128	0	0
2028.08	0.000334708	0.000295675	0.000293447	2.22822e-06	-1.25497e-51	-4.79181e-37	5.08402e-51	-3.78417e-130	0	0
2028.72	0.000357786	0.00030711	0.000305622	1.48755e-06	-7.51538e-53	-3.9699e-36	5.50058e-51	-1.58379e-132	0	0
2029.37	0.000373687	0.000315333	0.000314355	9.77923e-07	-4.34232e-54	-3.19249e-35	9.84041e-50	-6.29616e-135	0	0
2030.01	0.000378243	0.000319961	0.000319328	6.33082e-07	-2.42071e-55	-2.492e-34	1.76848e-48	-2.37741e-137	0	0
2030.65	0.000373602	0.000320759	0.000320355	4.03612e-07	-1.30202e-56	-1.88815e-33	3.05176e-47	-8.52673e-140	0	0
2031.3	0.000362499	0.000317654	0.0003174	2.53467e-07	-6.7568e-58	-1.38865e-32	5.05603e-46	-2.90477e-142	0	0
2031.94	0.000341702	0.000310729	0.000310572	1.56944e-07	-3.38311e-59	-9.91336e-32	8.04224e-45	-9.39918e-145	0	0
2032.58	0.000308366	0.000300217	0.000300121	9.61724e-08	-1.63435e-60	-6.86937e-31	1.22816e-43	-2.88881e-147	0	0
2033.22	0.000266897	0.000286485	0.000286425	5.91495e-08	-7.61767e-62	-4.62044e-30	1.8007e-42	-8.43333e-150	0	0
2033.87	0.000228023	0.000270002	0.000269964	3.8341e-08	-3.42572e-63	-3.0166e-29	2.53475e-41	-2.33846e-152	0	0
2034.51	0.000197607	0.000251323	0.000251293	2.98775e-08	-1.48639e-64	-1.91171e-28	3.42563e-40	-6.159e-155	0	0
2035.15	0.000173617	0.000231045	0.000231012	3.34343e-08	-6.22252e-66	-1.17597e-27	4.44481e-39	-1.54078e-157	0	0
2035.8	0.000150659	0.000209787	0.000209734	5.29754e-08	-2.51333e-67	-7.02168e-27	5.53702e-38	-3.66119e-160	0	0
2036.44	0.000125976	0.000188153	0.000188054	9.86787e-08	-9.79458e-69	-4.06962e-26	6.62228e-37	-8.2633e-163	0	0
2037.08	0.000101222	0.000166714	0.000166524	1.90513e-07	-3.68275e-70	-2.28948e-25	7.60411e-36	-1.77148e-165	0	0
2037.72	8.18313e-05	0.000145994	0.00014563	3.64085e-07	-1.33601e-71	-1.25022e-24	8.38298e-35	-3.60718e-168	0	0
2038.37	7.11883e-05	0.000126457	0.000125777	6.79468e-07	-4.67628e-73	-6.62688e-24	8.87273e-34	-6.9767e-171	0	0
2039.01	6.75363e-05	0.000108518	0.000107284	1.23361e-06	-1.57921e-74	-3.40957e-23	9.01624e-33	-1.28169e-173	0	0
2039.65	6.77668e-05	9.25517e-05	9.03751e-05	2.17657e-06	-5.14557e-76	-1.70279e-22	8.79636e-32	-2.23649e-176	0	0
2040.3	7.16248e-05	7.89178e-05	7.51868e-05	3.73101e-06	-1.61762e-77	-8.25448e-22	8.23928e-31	-3.70681e-179	0	0
2040.94	8.11164e-05	6.79883e-05	6.17752e-05	6.21305e-06	-4.90651e-79	-3.88408e-21	7.40943e-30	-5.83558e-182	0	0
2041.58	9.50628e-05	6.01771e-05	5.01264e-05	1.00507e-05	-1.43588e-80	-1.77401e-20	6.39719e-29	-8.72606e-185	0	0
2042.22	0.0001071	5.59639e-05	4.01697e-05	1.57941e-05	-4.05431e-82	-7.86492e-20	5.30277e-28	-1.23938e-187	0	0
2042.87	0.000110851	5.5902e-05	3.17915e-05	2.41104e-05	-1.1045e-83	-3.38456e-19	4.22013e-27	-1.67201e-190	0	0
2043.51	0.000104971	6.06026e-05	2.48487e-05	3.57539e-05	-2.90313e-85	-1.41377e-18	3.22447e-26	-2.14251e-193	0	0
2044.15	9.54329e-05	7.06863e-05	1.91812e-05	5.15051e-05	-7.36238e-87	-5.73224e-18	2.36537e-25	-2.60771e-196	0	0
2044.8	9.12507e-05	8.6698e-05	1.46227e-05	7.20753e-05	-1.80145e-88	-2.256e-17	1.6659e-24	-3.01471e-199	0	0
2045.44	9.77834e-05	0.000108988	1.10093e-05	9.79785e-05	-4.25281e-90	-8.61836e-17	1.12644e-23	-3.31041e-202	0	0
2046.08	0.000113532	0.000137571	8.18604e-06	0.000129385	-9.68684e-92	-3.19579e-16	7.31269e-23	-3.45278e-205	0	0
2046.72	0.000134579	0.000171988	6.01147e-06	0.000165976	-2.12882e-93	-1.15028e-15	4.55779e-22	-3.42062e-208	0	0
2047.37	0.000158897	0.000211191	4.3603e-06	0.000206831	-4.51386e-95	-4.01879e-15	2.72735e-21	-3.21879e-211	0	0
2048.01	0.000187867	0.000253502	3.12487e-06	0.000250377	-9.23439e-97	-1.36288e-14	1.56689e-20	-2.87694e-214	0	0
2048.65	0.000224015	0.000296646	2.21562e-06	0.00029443	-1.82272e-98	-4.48632e-14	8.64255e-20	-2.44241e-217	0	0
2049.29	0.00026816	0.000337902	1.56163e-06	0.00033634	-3.47123e-100	-1.43348e-13	4.57674e-19	-1.96951e-220	0	0
2049.94	0.000316997	0.000374349	1.11226e-06	0.000373237	-6.37819e-102	-4.44592e-13	2.32691e-18	-1.5085e-223	0	0
2050.58	0.000363046	0.000403186	8.41491e-07	0.000402344	-1.13074e-103	-1.33845e-12	1.13583e-17	-1.09745e-226	0	0
2051.22	0.000398613	0.000422085	7.57589e-07	0.000421328	-1.9341e-105	-3.91122e-12	5.32296e-17	-7.5836e-230	0	0
2051.87	0.000420004	0.00042952	9.20878e-07	0.000428599	-3.19189e-107	-1.10941e-11	2.39499e-16	-4.97754e-233	0	0
2052.51	0.000428551	0.000425009	1.47272e-06	0.000423537	-5.08239e-109	-3.05449e-11	1.03458e-15	-3.10317e-236	0	0
2053.15	0.00042822	0.000409251	2.67706e-06	0.000406574	-7.80799e-111	-8.16314e-11	4.29074e-15	-1.83758e-239	0	0
2053.79	0.000420871	0.000384109	4.9717e-06	0.000379137	-1.15734e-112	-2.1176e-10	1.70848e-14	-1.03356e-242	0	0
2054.44	0.000404203	0.000352467	9.01874e-06	0.000343449	-1.65514e-114	-5.33213e-10	6.53126e-14	-5.52177e-246	0	0
2055.08	0.000375725	0.000317962	1.57336e-05	0.000302229	-2.28381e-116	-1.30325e-09	2.39714e-13	-2.80201e-249	0	0
2055.72	0.000338099	0.000284615	2.62617e-05	0.000258357	-3.04045e-118	-3.09188e-09	8.44692e-13	-1.35055e-252	0	0
2056.37	0.000300348	0.000256403	4.1869e-05	0.000214541	-3.9054e-120	-7.12012e-09	2.85767e-12	-6.18308e-256	0	0
2057.01	0.0002702	0.000236772	6.37217e-05	0.000173066	-4.83999e-122	-1.59156e-08	9.28188e-12	-2.68873e-259	0	0
2057.65	0.000250211	0.000228144	9.25592e-05	0.000135619	-5.78729e-124	-3.45323e-08	2.89447e-11	-1.11056e-262	0	0
2058.29	0.000241711	0.000231474	0.000128309	0.000103238	-6.67664e-126	-7.27275e-08	8.66584e-11	-4.35696e-266	0	0
2058.94	0.000248337	0.000245937	0.000169743	7.63422e-05	-7.43175e-128	-1.48676e-07	2.49093e-10	-1.6236e-269	0	0
2059.58	0.000273605	0.000268842	0.000214296	5.48403e-05	-7.98134e-130	-2.95021e-07	6.87419e-10	-5.74676e-273	0	0
2060.22	0.000314123	0.000295884	0.000258182	3.82687e-05	-8.27013e-132	-5.68244e-07	1.82134e-09	-1.93206e-276	0	0
2060.87	0.000358758	0.000321726	0.000296842	2.59415e-05	-8.26799e-134	-1.06239e-06	4.63308e-09	-6.16989e-280	0	0
2061.51	0.000394218	0.000340862	0.000325696	1.70827e-05	-7.97515e-136	-1.92799e-06	1.13151e-08	-1.87161e-283	0	0
2062.15	0.00041043	0.000348583	0.000341025	1.09276e-05	-7.42214e-138	-3.39622e-06	2.65311e-08	-5.39409e-287	0	0
2062.79	0.00040189	0.000341802	0.000340759	6.79055e-06	-6.66455e-140	-5.80704e-06	5.9726e-08	-1.47811e-290	0	0
2063.44	0.000367318	0.000319524	0.000324934	4.09913e-06	-5.77383e-142	-9.63792e-06	1.29087e-07	-3.8619e-294	0	0
2064.08	0.000309546	0.000282831	0.000295686	2.40374e-06	-4.82624e-144	-1.55268e-05	2.67862e-07	-9.72511e-298	0	0
2064.72	0.00023592	0.000234398	0.000256775	1.36928e-06	-3.89228e-146	-2.42801e-05	5.33644e-07	-2.45638e-301	0	0
2065.37	0.000156594	0.00017772	0.000212796	7.57713e-07	-3.02867e-148	-3.68543e-05	1.02072e-06	-7.03567e-305	0	0
2066.01	7.93503e-05	0.000116273	0.000168291	4.07311e-07	-2.27379e-150	-5.42997e-05	1.87447e-06	--	0	0
2066.65	7.82225e-06	5.28727e-05	0.000127012	2.12695e-07	-1.64703e-152	-7.76567e-05	3.30501e-06	--	0	0
2067.29	-5.73903e-05	-1.06235e-05	9.14776e-05	1.07894e-07	-1.15107e-154	-0.000107804	5.59492e-06	--	0	0
2067.94	-0.000116325	-7.32464e-05	6.28743e-05	5.31672e-08	-7.76166e-157	-0.000145268	9.094e-06	--	0	0
2068.58	-0.000169783	-0.000134558	4.124e-05	2.54507e-08	-5.04962e-159	-0.000190016	1.4193e-05	--	0	0
2069.22	-0.000220198	-0.000194179	2.58138e-05	1.18349e-08	-3.16967e-161	-0.000241275	2.12704e-05	--	0	0
2069.86	-0.000269618	-0.000251375	1.54195e-05	5.34612e-09	-1.91964e-163	-0.000297412	3.0613e-05	0	0	0
2070.51	-0.000317615	-0.000304825	8.78977e-06	2.34596e-09	-1.12171e-165	-0.000355935	4.23188e-05	0	0	0
2071.15	-0.000360357	-0.000352651	4.78158e-06	1.00003e-09	-6.32395e-168	-0.000413638	5.62037e-05	0	0	0
2071.79	-0.000393647	-0.000392676	2.48229e-06	4.14106e-10	-3.43993e-170	-0.000466901	7.17416e-05	0	0	0
2072.44	-0.000413954	-0.000422835	1.22976e-06	1.66579e-10	-1.80535e-172	-0.000512133	8.80675e-05	0	0	0
2073.08	-0.000420985	-0.000441634	5.81402e-07	6.50934e-11	-9.14167e-175	-0.000546282	0.000104066	0	0	0
2073.72	-0.000416168	-0.000448531	2.62312e-07	2.47094e-11	-4.46623e-177	-0.00056734	0.000118547	0	0	0
2074.36	-0.000402814	-0.000444153	1.1294e-07	9.11165e-12	-2.10527e-179	-0.000574738	0.000130472	0	0	0
2075.01	-0.000382866	-0.000430295	4.6405e-08	3.26392e-12	-9.5747e-182	-0.000569534	0.000139193	0	0	0
2075.65	-0.000357378	-0.000409691	1.81957e-08	1.13577e-12	-4.2014e-184	-0.000554334	0.000144626	0	0	0
2076.29	-0.000328483	-0.000385618	6.80864e-09	3.8393e-13	-1.77875e-186	-0.00053292	0.000147296	0	0	0
2076.94	-0.000302996	-0.000361388	2.4313e-09	1.26073e-13	-7.26586e-189	-0.000509626	0.000148235	0	0	0
2077.58	-0.000291442	-0.000339828	8.28521e-10	4.0216e-14	-2.86359e-191	-0.000488563	0.000148734	0	0	0
2078.22	-0.000302144	-0.000322839	2.69436e-10	1.24619e-14	-1.08889e-193	-0.000472844	0.000150004	0	0	0
2078.86	-0.000332938	-0.000311115	8.36172e-11	3.75128e-15	-3.99495e-196	-0.000463955	0.00015284	0	0	0
2079.51	-0.000371429	-0.000304079	2.47641e-11	1.09694e-15	-1.41413e-198	-0.000461452	0.000157373	0	0	0
2080.15	-0.000402686	-0.000300057	6.99901e-12	3.11599e-16	-4.82967e-201	-0.000463054	0.000162997	0	0	0
2080.79	-0.000417372	-0.000296654	1.88772e-12	8.59838e-17	-1.59147e-203	-0.000465134	0.00016848	0	0	0
2081.44	-0.000412951	-0.00029128	4.85876e-13	2.30487e-17	-5.05975e-206	-0.000463526	0.000172246	0	0	0
2082.08	-0.000389856	-0.000281695	1.19344e-13	6.00184e-18	-1.55207e-208	-0.000454443	0.000172749	0	0	0
2082.72	-0.000348507	-0.000266463	2.79746e-14	1.51821e-18	-4.59353e-211	-0.000435302	0.000168839	0	0	0
2083.36	-0.000291403	-0.000245218	6.25768e-15	3.73067e-19	-1.31169e-213	-0.000405248	0.00016003	0	0	0
2084.01	-0.000226319	-0.000218681	1.33583e-15	8.90536e-20	-3.61384e-216	-0.000365271	0.00014659	0	0	0
2084.65	-0.000165635	-0.000188448	2.72128e-16	2.06502e-20	-9.60633e-219	-0.000317921	0.000129473	0	0	0
2085.29	-0.000120787	-0.000156615	5.29035e-17	4.65164e-21	-2.46375e-221	-0.000266709	0.000110093	0	0	0
2085.94	-9.63801e-05	-0.000125356	9.81483e-18	1.01788e-21	-6.09661e-224	-0.000215392	9.00362e-05	0	0	0
2086.58	-8.76894e-05	-9.65395e-05	1.73767e-18	2.16369e-22	-1.45556e-226	-0.000167313	7.07737e-05	0	0	0
2087.22	-8.37349e-05	-7.14874e-05	2.9359e-19	4.4679e-23	-3.35293e-229	-0.000124937	5.34498e-05	0	0	0
2087.86	-7.34964e-05	-5.08763e-05	4.7337e-20	8.9623e-24	-7.45196e-232	-8.96491e-05	3.87728e-05	0	0	0
2088.51	-5.25459e-05	-3.47873e-05	7.28364e-21	1.7464e-24	-1.59796e-234	-6.17984e-05	2.7011e-05	0	0	0
2089.15	-2.49689e-05	-2.28478e-05	1.06951e-21	3.30581e-25	-3.30609e-237	-4.09172e-05	1.80694e-05	0	0	0
2089.79	1.41068e-06	-1.44117e-05	1.49868e-22	6.07883e-26	-6.59955e-240	-2.60183e-05	1.16066e-05	0	0	0
2090.43	2.17438e-05	-8.72926e-06	2.00414e-23	1.08585e-26	-1.27106e-242	-1.58876e-05	7.1583e-06	0	0	0
2091.08	3.62457e-05	-5.07688e-06	2.55771e-24	1.88422e-27	-2.36193e-245	-9.31568e-06	4.2388e-06	0	0	0
2091.72	4.62887e-05	-2.83494e-06	3.11533e-25	3.17614e-28	-4.23468e-248	-5.24483e-06	2.40989e-06	0	0	0
2092.36	5.23302e-05	-1.51984e-06	3.6221e-26	5.20087e-29	-7.32531e-251	-2.83527e-06	1.31543e-06	0	0	0
2093.01	5.50044e-05	-7.82246e-07	4.0219e-27	8.27297e-30	-1.22259e-253	-1.47162e-06	6.89374e-07	0	0	0
2093.65	5.47348e-05	-3.86516e-07	4.27106e-28	1.27837e-30	-1.96875e-256	-7.33375e-07	3.46859e-07	0	0	0
2094.29	5.10115e-05	-1.83341e-07	4.35645e-29	1.91893e-31	-3.05878e-259	-3.50898e-07	1.67557e-07	0	0	0
2094.93	4.13516e-05	-8.34862e-08	4.32388e-30	2.79815e-32	-4.58521e-262	-1.61197e-07	7.77109e-08	0	0	0
2095.58	2.51104e-05	-3.64942e-08	4.33828e-31	3.96361e-33	-6.63164e-265	-7.10971e-08	3.46029e-08	0	0	0
2096.22	5.61181e-06	-1.53138e-08	4.83867e-32	5.45406e-34	-9.2541e-268	-3.01067e-08	1.47928e-08	0	0	0
2096.86	-1.09281e-05	-6.16863e-09	6.95591e-33	7.2905e-35	-1.24594e-270	-1.22402e-08	6.07156e-09	0	0	0
2097.51	-2.1384e-05	-2.38526e-09	1.36288e-33	9.4668e-36	-1.61851e-273	-4.77779e-09	2.39254e-09	0	0	0
2098.15	-2.93387e-05	-8.85358e-10	3.25304e-34	1.19415e-36	-2.02853e-276	-1.79052e-09	9.05161e-10	0	0	0
2098.79	-4.2401e-05	-3.15455e-10	8.36085e-35	1.46326e-37	-2.45302e-279	-6.44232e-10	3.28778e-10	0	0	0
2099.43	-6.56565e-05	-1.07891e-10	2.18227e-35	1.74178e-38	-2.86201e-282	-2.22545e-10	1.14654e-10	0	0	0

## Sheet: Fig.3A middle spectrum
X	data	fit	Hred	Hred*	HoxH	Hox	Hhyd	Hred'	Hsred	Hsred*
1715.03	-6.78952e-05	-7.44914e-92	0	4.18781e-288	-1.61968e-139	-6.04135e-115	0	-7.44914e-92	0	0
1715.67	-6.6275e-05	-3.47338e-90	0	8.0379e-286	-2.44553e-137	-5.67446e-113	0	-3.47338e-90	0	0
1716.32	-6.96034e-05	-1.56052e-88	0	1.51046e-283	-3.54509e-135	-5.11711e-111	0	-1.56052e-88	0	0
1716.96	-6.69687e-05	-6.75554e-87	0	2.77896e-281	-4.9339e-133	-4.4303e-109	0	-6.75554e-87	0	0
1717.6	-5.16665e-05	-2.81788e-85	0	5.00572e-279	-6.59269e-131	-3.68257e-107	--	-2.81788e-85	0	0
1718.24	-2.54395e-05	-1.13255e-83	0	8.82795e-277	-8.45753e-129	-2.93886e-105	--	-1.13255e-83	0	0
1718.89	4.48831e-06	-4.38596e-82	0	1.52427e-274	-1.04168e-126	-2.25172e-103	--	-4.38596e-82	0	0
1719.53	3.17745e-05	-1.63661e-80	0	2.57677e-272	-1.23178e-124	-1.65638e-101	--	-1.63661e-80	0	0
1720.17	5.51979e-05	-5.88431e-79	0	4.26479e-270	-1.39843e-122	-1.16981e-99	--	-5.88431e-79	0	0
1720.82	7.48065e-05	-2.03854e-77	0	6.9108e-268	-1.52426e-120	-7.93192e-98	4.0847e-307	-2.03854e-77	0	0
1721.46	8.67249e-05	-6.80479e-76	0	1.0964e-265	-1.5951e-118	-5.16359e-96	4.69569e-304	-6.80479e-76	0	0
1722.1	8.36238e-05	-2.18868e-74	0	1.70302e-263	-1.60259e-116	-3.22725e-94	5.20823e-301	-2.18868e-74	0	0
1722.74	6.31612e-05	-6.78303e-73	0	2.58988e-261	-1.54585e-114	-1.93653e-92	5.57356e-298	-6.78303e-73	0	0
1723.39	3.30721e-05	-2.02552e-71	0	3.85611e-259	-1.4316e-112	-1.11564e-90	5.75474e-295	-2.02552e-71	0	0
1724.03	8.18006e-06	-5.82802e-70	0	5.62118e-257	-1.27287e-110	-6.17069e-89	5.73285e-292	-5.82802e-70	0	0
1724.67	2.76124e-06	-1.61576e-68	0	8.02261e-255	-1.08657e-108	-3.27681e-87	5.51019e-289	-1.61576e-68	0	0
1725.32	2.23708e-05	-4.31626e-67	0	1.12102e-252	-8.9051e-107	-1.67063e-85	5.10992e-286	-4.31626e-67	0	0
1725.96	5.78233e-05	-1.11099e-65	0	1.53363e-250	-7.00696e-105	-8.17741e-84	4.57207e-283	-1.11099e-65	0	0
1726.6	8.7189e-05	-2.75539e-64	0	2.05418e-248	-5.29334e-103	-3.84292e-82	3.94696e-280	-2.75539e-64	0	0
1727.24	9.1456e-05	-6.58459e-63	0	2.69379e-246	-3.83918e-101	-1.73387e-80	3.28749e-277	-6.58459e-63	0	0
1727.89	7.02427e-05	-1.51617e-61	0	3.45859e-244	-2.67335e-99	-7.5107e-79	2.64191e-274	-1.51617e-61	0	--
1728.53	4.02339e-05	-3.36386e-60	0	4.34755e-242	-1.78724e-97	-3.12359e-77	2.04843e-271	-3.36386e-60	0	--
1729.17	1.82607e-05	-7.19118e-59	0	5.35056e-240	-1.14715e-95	-1.2472e-75	1.53242e-268	-7.19118e-59	0	--
1729.82	9.88561e-06	-1.48127e-57	0	6.44708e-238	-7.06911e-94	-4.78109e-74	1.10608e-265	-1.48127e-57	0	--
1730.46	1.14823e-05	-2.93996e-56	0	7.60565e-236	-4.18234e-92	-1.75965e-72	7.7027e-263	-2.93996e-56	0	--
1731.1	1.34835e-05	-5.6224e-55	0	8.78455e-234	-2.37565e-90	-6.2178e-71	5.17551e-260	-5.6224e-55	0	--
1731.74	2.75812e-06	-1.03603e-53	0	9.93372e-232	-1.29555e-88	-2.10938e-69	3.35517e-257	-1.03603e-53	0	1.92269e-305
1732.39	-2.8381e-05	-1.83949e-52	0	1.0998e-229	-6.78325e-87	-6.87042e-68	2.09859e-254	-1.83949e-52	0	1.53344e-302
1733.03	-7.001e-05	-3.14697e-51	0	1.19213e-227	-3.4098e-85	-2.14843e-66	1.26646e-251	-3.14697e-51	0	1.18403e-299
1733.67	-9.74404e-05	-5.18754e-50	0	1.26516e-225	-1.64562e-83	-6.4501e-65	7.37405e-249	-5.18754e-50	0	8.8511e-297
1734.32	-9.1827e-05	-8.23952e-49	0	1.31455e-223	-7.62497e-82	-1.85918e-63	4.1426e-246	-8.23952e-49	0	6.40575e-294
1734.96	-5.71997e-05	-1.261e-47	0	1.33726e-221	-3.392e-80	-5.145e-62	2.24538e-243	-1.261e-47	0	4.48829e-291
1735.6	-1.44217e-05	-1.85951e-46	0	1.33188e-219	-1.44872e-78	-1.36697e-60	1.17425e-240	-1.85951e-46	0	3.0446e-288
1736.24	1.5583e-05	-2.64215e-45	0	1.29875e-217	-5.94046e-77	-3.48692e-59	5.9249e-238	-2.64215e-45	0	1.99949e-285
1736.89	2.17302e-05	-3.61731e-44	0	1.23992e-215	-2.33865e-75	-8.53951e-58	2.88439e-235	-3.61731e-44	0	1.27129e-282
1737.53	4.69159e-06	-4.77186e-43	0	1.15897e-213	-8.83935e-74	-2.00786e-56	1.35481e-232	-4.77186e-43	0	7.82544e-280
1738.17	-2.28156e-05	-6.06543e-42	0	1.06062e-211	-3.20763e-72	-4.53256e-55	6.13976e-230	-6.06543e-42	0	4.66349e-277
1738.82	-4.44544e-05	-7.42862e-41	0	9.50287e-210	-1.11753e-70	-9.82342e-54	2.68459e-227	-7.42862e-41	0	2.69062e-274
1739.46	-5.27854e-05	-8.7665e-40	0	8.33606e-208	-3.738e-69	-2.04405e-52	1.13255e-224	-8.7665e-40	0	1.50291e-271
1740.1	-5.22618e-05	-9.9682e-39	0	7.1594e-206	-1.20041e-67	-4.08345e-51	4.60983e-222	-9.9682e-39	0	8.12735e-269
1740.74	-4.94316e-05	-1.09214e-37	0	6.02007e-204	-3.7011e-66	-7.83202e-50	1.81036e-219	-1.09214e-37	0	4.25505e-266
1741.39	-4.41758e-05	-1.15296e-36	0	4.95606e-202	-1.09557e-64	-1.44221e-48	6.85957e-217	-1.15296e-36	0	2.15675e-263
1742.03	-3.37764e-05	-1.17279e-35	0	3.99466e-200	-3.11357e-63	-2.54973e-47	2.50773e-214	-1.17279e-35	0	1.05836e-260
1742.67	-2.1149e-05	-1.14948e-34	0	3.15235e-198	-8.49546e-62	-4.32781e-46	8.84534e-212	-1.14948e-34	0	5.02809e-258
1743.31	-1.37852e-05	-1.08556e-33	0	2.43555e-196	-2.22548e-60	-7.05262e-45	3.01024e-209	-1.08556e-33	0	2.31266e-255
1743.96	-1.71583e-05	-9.87819e-33	0	1.84234e-194	-5.59719e-59	-1.10342e-43	9.88412e-207	-9.87819e-33	0	1.02982e-252
1744.6	-2.845e-05	-8.66111e-32	0	1.36443e-192	-1.35153e-57	-1.65746e-42	3.13131e-204	-8.66111e-32	0	4.43962e-250
1745.24	-3.9203e-05	-7.31715e-31	0	9.89334e-191	-3.13321e-56	-2.39031e-41	9.57121e-202	-7.31715e-31	0	1.85298e-247
1745.89	-4.1959e-05	-5.95638e-30	0	7.02334e-189	-6.97369e-55	-3.30958e-40	2.82266e-199	-5.95638e-30	0	7.48742e-245
1746.53	-3.79779e-05	-4.67192e-29	0	4.88151e-187	-1.4902e-53	-4.39948e-39	8.03158e-197	-4.67192e-29	0	2.92909e-242
1747.17	-3.48605e-05	-3.53086e-28	0	3.3218e-185	-3.05729e-52	-5.61486e-38	2.20493e-194	-3.53086e-28	0	1.10936e-239
1747.81	-3.83386e-05	-2.57121e-27	0	2.21311e-183	-6.02195e-51	-6.87995e-37	5.84037e-192	-2.57121e-27	0	4.06771e-237
1748.46	-4.60006e-05	-1.80413e-26	0	1.44358e-181	-1.1388e-49	-8.09359e-36	1.49258e-189	-1.80413e-26	0	1.44399e-234
1749.1	-5.17928e-05	-1.21975e-25	0	9.21914e-180	-2.0676e-48	-9.14125e-35	3.68032e-187	-1.21975e-25	0	4.96272e-232
1749.74	-5.17551e-05	-7.94591e-25	0	5.76432e-178	-3.60407e-47	-9.91242e-34	8.75559e-185	-7.94591e-25	0	1.65125e-229
1750.39	-4.49457e-05	-4.98758e-24	0	3.52871e-176	-6.03158e-46	-1.03196e-32	2.00972e-182	-4.98758e-24	0	5.31915e-227
1751.03	-3.06169e-05	-3.01653e-23	0	2.11491e-174	-9.69119e-45	-1.03147e-31	4.45081e-180	-3.01653e-23	0	1.65887e-224
1751.67	-8.77407e-06	-1.75792e-22	0	1.24102e-172	-1.49497e-43	-9.8982e-31	9.51027e-178	-1.75792e-22	0	5.00863e-222
1752.31	1.72766e-05	-9.87102e-22	0	7.12975e-171	-2.2141e-42	-9.11941e-30	1.96064e-175	-9.87102e-22	0	1.46408e-219
1752.96	4.08011e-05	-5.34069e-21	0	4.01032e-169	-3.14826e-41	-8.06652e-29	3.89991e-173	-5.34069e-21	0	4.14332e-217
1753.6	5.67641e-05	-2.78423e-20	0	2.20848e-167	-4.29787e-40	-6.85039e-28	7.48449e-171	-2.78423e-20	0	1.1352e-214
1754.24	6.45703e-05	-1.39857e-19	0	1.19074e-165	-5.63307e-39	-5.58538e-27	1.38587e-168	-1.39857e-19	0	3.01114e-212
1754.89	6.59636e-05	-6.76918e-19	0	6.28567e-164	-7.08837e-38	-4.3722e-26	2.47589e-166	-6.76918e-19	0	7.73269e-210
1755.53	6.24046e-05	-3.15689e-18	0	3.24859e-162	-8.5636e-37	-3.28591e-25	4.2677e-164	-3.15689e-18	0	1.92251e-207
1756.17	5.45045e-05	-1.41859e-17	0	1.64379e-160	-9.93289e-36	-2.37094e-24	7.09754e-162	-1.41859e-17	0	4.62747e-205
1756.81	4.63758e-05	-6.14222e-17	0	8.14347e-159	-1.10612e-34	-1.64246e-23	1.13887e-159	-6.14221e-17	0	1.07834e-202
1757.46	4.35021e-05	-2.56251e-16	0	3.94985e-157	-1.18261e-33	-1.09239e-22	1.76315e-157	-2.56251e-16	0	2.43282e-200
1758.1	4.81851e-05	-1.0301e-15	0	1.87569e-155	-1.21391e-32	-6.97543e-22	2.63364e-155	-1.0301e-15	0	5.31374e-198
1758.74	5.55592e-05	-3.98992e-15	0	8.72072e-154	-1.19631e-31	-4.27634e-21	3.79555e-153	-3.98992e-15	0	1.12364e-195
1759.39	5.70781e-05	-1.48909e-14	0	3.96965e-152	-1.1319e-30	-2.517e-20	5.27771e-151	-1.48909e-14	0	2.30036e-193
1760.03	4.94257e-05	-5.35491e-14	0	1.76914e-150	-1.02821e-29	-1.42234e-19	7.08055e-149	-5.3549e-14	0	4.55934e-191
1760.67	3.69972e-05	-1.85547e-13	0	7.71935e-149	-8.96737e-29	-7.71671e-19	9.16515e-147	-1.85547e-13	0	8.74874e-189
1761.31	2.64008e-05	-6.19484e-13	0	3.29768e-147	-7.50857e-28	-4.01948e-18	1.14463e-144	-6.1948e-13	0	1.62528e-186
1761.96	1.99678e-05	-1.99287e-12	0	1.37926e-145	-6.03613e-27	-2.0101e-17	1.37924e-142	-1.99285e-12	0	2.92313e-184
1762.6	1.70345e-05	-6.17731e-12	0	5.64799e-144	-4.65875e-26	-9.65103e-17	1.60349e-140	-6.17721e-12	0	5.08987e-182
1763.24	1.59912e-05	-1.84499e-11	0	2.26439e-142	-3.45214e-25	-4.44876e-16	1.79865e-138	-1.84494e-11	0	8.58033e-180
1763.88	1.77836e-05	-5.30961e-11	0	8.88827e-141	-2.45594e-24	-1.96886e-15	1.94659e-136	-5.30941e-11	0	1.40036e-177
1764.53	2.1614e-05	-1.47233e-10	0	3.4158e-139	-1.67747e-23	-8.36561e-15	2.03262e-134	-1.47225e-10	0	2.21265e-175
1765.17	2.33545e-05	-3.93393e-10	0	1.28522e-137	-1.10002e-22	-3.41264e-14	2.04781e-132	-3.93359e-10	0	3.38474e-173
1765.81	1.79162e-05	-1.01281e-09	0	4.73448e-136	-6.9256e-22	-1.33657e-13	1.99055e-130	-1.01267e-09	0	5.01274e-171
1766.46	4.15902e-06	-2.51251e-09	0	1.70756e-134	-4.18623e-21	-5.02578e-13	1.86685e-128	-2.51201e-09	0	7.18727e-169
1767.1	-1.30741e-05	-6.00588e-09	0	6.02963e-133	-2.42939e-20	-1.81436e-12	1.68926e-126	-6.00406e-09	0	9.9768e-167
1767.74	-2.5848e-05	-1.38337e-08	0	2.08456e-131	-1.35357e-19	-6.28858e-12	1.4748e-124	-1.38274e-08	0	1.34078e-164
1768.38	-3.14133e-05	-3.07048e-08	0	7.0558e-130	-7.24057e-19	-2.09262e-11	1.24229e-122	-3.06839e-08	0	1.74446e-162
1769.03	-3.42844e-05	-6.5674e-08	0	2.33824e-128	-3.71856e-18	-6.68557e-11	1.00963e-120	-6.56072e-08	0	2.19736e-160
1769.67	-4.05926e-05	-1.3537e-07	0	7.58647e-127	-1.83352e-17	-2.05067e-10	7.91692e-119	-1.35165e-07	0	2.67968e-158
1770.31	-5.12086e-05	-2.68922e-07	0	2.40991e-125	-8.6797e-17	-6.03894e-10	5.98963e-117	-2.68318e-07	0	3.16374e-156
1770.96	-6.11248e-05	-5.14932e-07	0	7.49499e-124	-3.94488e-16	-1.7074e-09	4.37215e-115	-5.13225e-07	0	3.61625e-154
1771.6	-6.59738e-05	-9.50518e-07	0	2.28219e-122	-1.72136e-15	-4.63468e-09	3.07922e-113	-9.45883e-07	0	4.00178e-152
1772.24	-6.4063e-05	-1.69181e-06	0	6.80363e-121	-7.21139e-15	-1.20785e-08	2.09237e-111	-1.67973e-06	0	4.28733e-150
1772.88	-5.47873e-05	-2.9044e-06	0	1.98582e-119	-2.90052e-14	-3.02214e-08	1.37179e-109	-2.87418e-06	0	4.44691e-148
1773.53	-4.03054e-05	-4.81131e-06	0	5.67477e-118	-1.12006e-13	-7.25983e-08	8.67738e-108	-4.73871e-06	0	4.46549e-146
1774.17	-2.61289e-05	-7.69543e-06	0	1.58769e-116	-4.15255e-13	-1.67435e-07	5.29591e-106	-7.52799e-06	0	4.34127e-144
1774.81	-1.77465e-05	-1.18939e-05	0	4.34904e-115	-1.47808e-12	-3.70746e-07	3.11848e-104	-1.15231e-05	--	4.08605e-142
1775.46	-1.54165e-05	-1.77836e-05	0	1.16635e-113	-5.05116e-12	-7.88161e-07	1.77173e-102	-1.69955e-05	--	3.72331e-140
1776.1	-1.58878e-05	-2.57615e-05	0	3.0625e-112	-1.65727e-11	-1.60865e-06	9.7119e-101	-2.41529e-05	--	3.28468e-138
1776.74	-1.79281e-05	-3.62255e-05	--	7.87285e-111	-5.22041e-11	-3.15224e-06	5.13643e-99	-3.30732e-05	--	2.8054e-136
1777.38	-2.4954e-05	-4.95677e-05	--	1.98151e-109	-1.57879e-10	-5.93043e-06	2.62102e-97	-4.36372e-05	--	2.31971e-134
1778.03	-4.2416e-05	-6.61887e-05	--	4.88284e-108	-4.5841e-10	-1.07118e-05	1.29042e-95	-5.54764e-05	1.41446e-304	1.857e-132
1778.67	-7.27245e-05	-8.65338e-05	--	1.17803e-106	-1.27789e-09	-1.85757e-05	6.12973e-94	-6.79568e-05	5.03485e-301	1.43923e-130
1779.31	-0.000111778	-0.000111141	2.04475e-307	2.78259e-105	-3.42011e-09	-3.09271e-05	2.80934e-92	-8.02102e-05	1.70716e-297	1.0799e-128
1779.96	-0.000152672	-0.000140666	4.59047e-304	6.43507e-104	-8.78812e-09	-4.94358e-05	1.24228e-90	-9.12217e-05	5.51382e-294	7.84473e-127
1780.6	-0.000192454	-0.000175852	9.87144e-301	1.45702e-102	-2.16801e-08	-7.5867e-05	5.3001e-89	-9.9963e-05	1.69638e-290	5.51709e-125
1781.24	-0.000235431	-0.000217382	2.03335e-297	3.22989e-101	-5.13495e-08	-0.000111782	2.18173e-87	-0.000105549	4.9715e-287	3.75647e-123
1781.88	-0.000289587	-0.000265626	4.01188e-294	7.01002e-100	-1.16767e-07	-0.000158126	8.66502e-86	-0.000107384	1.38785e-283	2.47621e-121
1782.53	-0.000357978	-0.000320277	7.58216e-291	1.48957e-98	-2.54926e-07	-0.000214755	3.32039e-84	-0.000105268	3.69054e-280	1.58028e-119
1783.17	-0.000435838	-0.000379987	1.3726e-287	3.09892e-97	-5.34338e-07	-0.000280021	1.22761e-82	-9.9432e-05	9.34824e-277	9.76382e-118
1783.81	-0.000510243	-0.000442119	2.38014e-284	6.31206e-96	-1.07529e-06	-0.000350548	4.37908e-81	-9.04958e-05	2.2556e-273	5.84041e-116
1784.45	-0.000566017	-0.00050276	3.95336e-281	1.25875e-94	-2.07753e-06	-0.000421322	1.50715e-79	-7.93602e-05	5.18425e-270	3.38224e-114
1785.1	-0.000593283	-0.000557083	6.28983e-278	2.45765e-93	-3.85369e-06	-0.000486172	5.00474e-78	-6.70578e-05	1.13501e-266	1.89629e-112
1785.74	-0.000593144	-0.00060007	9.58556e-275	4.69794e-92	-6.86303e-06	-0.00053861	1.60346e-76	-5.45969e-05	2.36706e-263	1.0293e-110
1786.38	-0.000575615	-0.000627451	1.39928e-271	8.79236e-91	-1.17345e-05	-0.000572886	4.95663e-75	-4.28311e-05	4.70229e-260	5.40903e-109
1787.03	-0.000550971	-0.000636659	1.95657e-268	1.61107e-89	-1.92628e-05	-0.00058502	1.47831e-73	-3.2376e-05	8.89819e-257	2.75191e-107
1787.67	-0.000523921	-0.000627505	2.62057e-265	2.89021e-88	-3.03589e-05	-0.000573565	4.25399e-72	-2.35808e-05	1.60393e-253	1.35546e-105
1788.31	-0.000493044	-0.000602374	3.36203e-262	5.0764e-87	-4.59369e-05	-0.000539888	1.18108e-70	-1.65488e-05	2.75399e-250	6.46367e-104
1788.95	-0.000455478	-0.000565828	4.13157e-259	8.72955e-86	-6.67338e-05	-0.000487903	3.16382e-69	-1.11904e-05	4.50434e-247	2.98407e-102
1789.6	-0.000411409	-0.000523692	4.86334e-256	1.46973e-84	-9.30763e-05	-0.000423324	8.17705e-68	-7.29119e-06	7.01765e-244	1.33376e-100
1790.24	-0.000366351	-0.000481845	5.48355e-253	2.42266e-83	-0.000124635	-0.000352632	2.03907e-66	-4.57744e-06	1.04146e-240	5.77143e-99
1790.88	-0.000328342	-0.000445022	5.92237e-250	3.90982e-82	-0.000160233	-0.000282019	4.90592e-65	-2.76898e-06	1.47228e-237	2.41784e-97
1791.53	-0.000301287	-0.000415934	6.12684e-247	6.17775e-81	-0.000197776	-0.000216544	1.13883e-63	-1.61394e-06	1.98256e-234	9.80644e-96
1792.17	-0.000282307	-0.00039491	6.07134e-244	9.55682e-80	-0.000234371	-0.000159633	2.55064e-62	-9.06421e-07	2.54305e-231	3.85064e-94
1792.81	-0.000266404	-0.000380122	5.76287e-241	1.44746e-78	-0.000266651	-0.000112981	5.51177e-61	-4.90505e-07	3.10725e-228	1.46384e-92
1793.45	-0.000252831	-0.000368294	5.23963e-238	2.14639e-77	-0.000291266	-7.67716e-05	1.14917e-59	-2.55758e-07	3.61651e-225	5.38754e-91
1794.1	-0.000245125	-0.000355668	4.56319e-235	3.11616e-76	-0.000305455	-5.00845e-05	2.31169e-58	-1.28495e-07	4.00954e-222	1.91967e-89
1794.74	-0.00024631	-0.000338981	3.80666e-232	4.42936e-75	-0.000307549	-3.13701e-05	4.48667e-57	-6.22038e-08	4.2344e-219	6.62219e-88
1795.38	-0.00025514	-0.000316189	3.04177e-229	6.16412e-74	-0.000297296	-1.88641e-05	8.40179e-56	-2.90148e-08	4.25972e-216	2.21164e-86
1796.03	-0.000265631	-0.000286818	2.32817e-226	8.39869e-73	-0.000275914	-1.0891e-05	1.51799e-54	-1.30405e-08	4.0819e-213	7.15099e-85
1796.67	-0.000270613	-0.000251891	1.70691e-223	1.12037e-71	-0.000245849	-6.0368e-06	2.64619e-53	-5.6473e-09	3.72595e-210	2.23849e-83
1797.31	-0.000266329	-0.00021353	1.19871e-220	1.46325e-70	-0.000210315	-3.21259e-06	4.45063e-52	-2.35646e-09	3.23968e-207	6.78396e-82
1797.95	-0.000255407	-0.000174378	8.06351e-218	1.87106e-69	-0.000172736	-1.6414e-06	7.22228e-51	-9.47439e-10	2.68324e-204	1.99044e-80
1798.6	-0.000243507	-0.000137014	5.19566e-215	2.34243e-68	-0.000136208	-8.05157e-07	1.13078e-49	-3.67041e-10	2.11695e-201	5.65398e-79
1799.24	-0.000232481	-0.000103497	3.20675e-212	2.87113e-67	-0.000103118	-3.7919e-07	1.70818e-48	-1.37009e-10	1.59093e-198	1.55488e-77
1799.88	-0.00021843	-7.51217e-05	1.89581e-209	3.44549e-66	-7.49502e-05	-1.71452e-07	2.48966e-47	-4.92786e-11	1.1389e-195	4.13979e-76
1800.53	-0.000196889	-5.23768e-05	1.07358e-206	4.04815e-65	-5.23023e-05	-7.4428e-08	3.50105e-46	-1.70781e-11	7.76627e-193	1.06708e-74
1801.17	-0.000168332	-3.50722e-05	5.8234e-204	4.65664e-64	-3.50412e-05	-3.10198e-08	4.75016e-45	-5.70284e-12	5.04465e-190	2.66291e-73
1801.81	-0.000135989	-2.2552e-05	3.02571e-201	5.24443e-63	-2.25395e-05	-1.24123e-08	6.21826e-44	-1.83491e-12	3.12134e-187	6.43357e-72
1802.45	-0.000102316	-1.39242e-05	1.50586e-198	5.78273e-62	-1.39194e-05	-4.76841e-09	7.85383e-43	-5.68869e-13	1.83969e-184	1.50483e-70
1803.1	-6.76597e-05	-8.25464e-06	7.17879e-196	6.24277e-61	-8.25288e-06	-1.75875e-09	9.57073e-42	-1.69934e-13	1.03285e-181	3.40769e-69
1803.74	-3.44681e-05	-4.69848e-06	3.27811e-193	6.59828e-60	-4.69785e-06	-6.22794e-10	1.12528e-40	-4.89128e-14	5.52364e-179	7.47086e-68
1804.38	-7.7374e-06	-2.56767e-06	1.43384e-190	6.82801e-59	-2.56745e-06	-2.11735e-10	1.27652e-39	-1.35655e-14	2.81387e-176	1.5857e-66
1805.03	7.12685e-06	-1.34722e-06	6.00741e-188	6.91778e-58	-1.34715e-06	-6.91117e-11	1.39715e-38	-3.62512e-15	1.36545e-173	3.25843e-65
1805.67	8.63057e-06	-6.78656e-07	2.4109e-185	6.86197e-57	-6.78635e-07	-2.1658e-11	1.47541e-37	-9.33427e-16	6.31158e-171	6.48237e-64
1806.31	2.11938e-06	-3.28228e-07	9.26786e-183	6.66409e-56	-3.28221e-07	-6.51621e-12	1.50326e-36	-2.31585e-16	2.77903e-168	1.24853e-62
1806.95	-2.65025e-06	-1.52409e-07	3.4126e-180	6.33639e-55	-1.52407e-07	-1.88226e-12	1.47777e-35	-5.53621e-17	1.16558e-165	2.3281e-61
1807.6	1.18737e-06	-6.79451e-08	1.20365e-177	5.89865e-54	-6.79446e-08	-5.22006e-13	1.40162e-34	-1.27523e-17	4.65672e-163	4.20284e-60
1808.24	1.18627e-05	-2.90814e-08	4.06649e-175	5.37616e-53	-2.90812e-08	-1.38989e-13	1.28264e-33	-2.83031e-18	1.77219e-160	7.34551e-59
1808.88	2.03943e-05	-1.19504e-08	1.31597e-172	4.79736e-52	-1.19503e-08	-3.55297e-14	1.13248e-32	-6.05276e-19	6.42443e-158	1.24291e-57
1809.52	2.00431e-05	-4.71472e-09	4.07925e-170	4.19122e-51	-4.71471e-09	-8.71994e-15	9.64733e-32	-1.24723e-19	2.21845e-155	2.03608e-56
1810.17	1.2169e-05	-1.78583e-09	1.21121e-167	3.585e-50	-1.78583e-09	-2.05468e-15	7.92932e-31	-2.47633e-20	7.29723e-153	3.22916e-55
1810.81	3.30275e-06	-6.49434e-10	3.44484e-165	3.00225e-49	-6.49434e-10	-4.6482e-16	6.28805e-30	-4.73745e-21	2.28643e-150	4.95818e-54
1811.45	-2.44654e-06	-2.26745e-10	9.38477e-163	2.46159e-48	-2.26745e-10	-1.00956e-16	4.81113e-29	-8.73279e-22	6.82417e-148	7.37044e-53
1812.1	-5.97639e-06	-7.60065e-11	2.44898e-160	1.97602e-47	-7.60065e-11	-2.1052e-17	3.55165e-28	-1.55108e-22	1.94014e-145	1.06072e-51
1812.74	-9.8756e-06	-2.44609e-11	6.12144e-158	1.55302e-46	-2.44609e-11	-4.21464e-18	2.52967e-27	-2.65452e-23	5.25424e-143	1.47792e-50
1813.38	-1.34845e-05	-7.55793e-12	1.46565e-155	1.19502e-45	-7.55793e-12	-8.10097e-19	1.7384e-26	-4.37734e-24	1.35543e-140	1.99359e-49
1814.02	-1.37221e-05	-2.24204e-12	3.36133e-153	9.00284e-45	-2.24204e-12	-1.49494e-19	1.15262e-25	-6.95517e-25	3.33072e-138	2.60352e-48
1814.67	-8.84075e-06	-6.38545e-13	7.38415e-151	6.6404e-44	-6.38545e-13	-2.64861e-20	7.37353e-25	-1.06482e-25	7.79634e-136	3.29172e-47
1815.31	-1.98072e-06	-1.74602e-13	1.55381e-148	4.79533e-43	-1.74602e-13	-4.50528e-21	4.55109e-24	-1.57079e-26	1.73834e-133	4.02925e-46
1815.95	2.33206e-06	-4.58371e-14	3.13184e-146	3.39041e-42	-4.58371e-14	-7.35758e-22	2.71023e-23	-2.23271e-27	3.69209e-131	4.77489e-45
1816.6	2.82012e-06	-1.1553e-14	6.04657e-144	2.34691e-41	-1.1553e-14	-1.1536e-22	1.55722e-22	-3.05786e-28	7.46966e-129	5.47824e-44
1817.24	3.25741e-06	-2.79562e-15	1.11822e-141	1.59055e-40	-2.79562e-15	-1.73655e-23	8.63262e-22	-4.0353e-29	1.43953e-126	6.08494e-43
1817.88	5.64466e-06	-6.49487e-16	1.98084e-139	1.05538e-39	-6.49491e-16	-2.50974e-24	4.6173e-21	-5.13105e-30	2.64262e-124	6.54351e-42
1818.52	7.37811e-06	-1.44846e-16	3.36109e-137	6.85618e-39	-1.4487e-16	-3.4824e-25	2.38278e-20	-6.2865e-31	4.62103e-122	6.81245e-41
1819.17	3.89446e-06	-3.09048e-17	5.46283e-135	4.36077e-38	-3.10234e-17	-4.63914e-26	1.1864e-19	-7.42137e-32	7.69726e-120	6.86648e-40
1819.81	-5.26061e-06	-5.80846e-18	8.50476e-133	2.71553e-37	-6.3784e-18	-5.93342e-27	5.69944e-19	-8.44172e-33	1.22131e-117	6.70044e-39
1820.45	-1.48343e-05	1.38265e-18	1.26827e-130	1.6556e-36	-1.25905e-18	-7.28588e-28	2.6417e-18	-9.25231e-34	1.84589e-115	6.3301e-38
1821.1	-1.9302e-05	1.15751e-17	1.81164e-128	9.88243e-36	-2.38607e-19	-8.5895e-29	1.18137e-17	-9.77106e-35	2.65754e-113	5.7897e-37
1821.74	-1.69612e-05	5.09294e-17	2.47877e-126	5.77541e-35	-4.34142e-20	-9.72217e-30	5.09728e-17	-9.94273e-36	3.64456e-111	5.12673e-36
1822.38	-1.04717e-05	2.12191e-16	3.24869e-124	3.30454e-34	-7.58386e-21	-1.0565e-30	2.12199e-16	-9.74858e-37	4.76105e-109	4.39504e-35
1823.02	-5.26501e-06	8.52312e-16	4.07838e-122	1.85118e-33	-1.27191e-21	-1.10225e-31	8.52314e-16	-9.20979e-38	5.92452e-107	3.64774e-34
1823.67	-4.14276e-06	3.30299e-15	4.90425e-120	1.01531e-32	-2.04802e-22	-1.10409e-32	3.30299e-15	-8.38359e-39	7.02255e-105	2.93105e-33
1824.31	-5.03382e-06	1.235e-14	5.64892e-118	5.45197e-32	-3.16607e-23	-1.06178e-33	1.235e-14	-7.35331e-40	7.92918e-103	2.28013e-32
1824.95	-4.36214e-06	4.45529e-14	6.23254e-116	2.86629e-31	-4.69911e-24	-9.80338e-35	4.45529e-14	-6.21452e-41	8.52814e-101	1.71726e-31
1825.6	-3.10776e-06	1.55074e-13	6.58676e-114	1.47535e-30	-6.69606e-25	-8.69012e-36	1.55074e-13	-5.06063e-42	8.7372e-99	1.25213e-30
1826.24	-6.5088e-06	5.20776e-13	6.66784e-112	7.43501e-30	-9.16078e-26	-7.3958e-37	5.20776e-13	-3.97077e-43	8.52673e-97	8.83897e-30
1826.88	-1.64395e-05	1.68739e-12	6.46555e-110	3.6684e-29	-1.20325e-26	-6.04301e-38	1.68739e-12	-3.00204e-44	7.92656e-95	6.04077e-29
1827.52	-2.80911e-05	5.27511e-12	6.00527e-108	1.77207e-28	-1.51735e-27	-4.74057e-39	5.27511e-12	-2.1869e-45	7.01906e-93	3.99688e-28
1828.17	-3.44046e-05	1.5911e-11	5.34277e-106	8.38097e-28	-1.83707e-28	-3.5704e-40	1.5911e-11	-1.53503e-46	5.9206e-91	2.56029e-27
1828.81	-3.3682e-05	4.63039e-11	4.5531e-104	3.88077e-27	-2.13538e-29	-2.58174e-41	4.63039e-11	-1.03818e-47	4.75712e-89	1.58779e-26
1829.45	-2.90607e-05	1.30013e-10	3.71668e-102	1.75934e-26	-2.38306e-30	-1.79233e-42	1.30013e-10	-6.76557e-49	3.64095e-87	9.53319e-26
1830.09	-2.35926e-05	3.52216e-10	2.90609e-100	7.80895e-26	-2.5533e-31	-1.19462e-43	3.52216e-10	-4.24822e-50	2.65447e-85	5.54141e-25
1830.74	-1.82992e-05	9.20622e-10	2.17656e-98	3.39347e-25	-2.62651e-32	-7.64458e-45	9.20622e-10	-2.57029e-51	1.84345e-83	3.11846e-24
1831.38	-1.37031e-05	2.3217e-09	1.56149e-96	1.4438e-24	-2.59397e-33	-4.69662e-46	2.3217e-09	-1.49841e-52	1.21949e-81	1.69902e-23
1832.02	-1.1113e-05	5.64912e-09	1.07304e-94	6.01418e-24	-2.45958e-34	-2.7703e-47	5.64912e-09	-8.41684e-54	7.68455e-80	8.96183e-23
1832.67	-9.48313e-06	1.3262e-08	7.06314e-93	2.45277e-23	-2.23905e-35	-1.56883e-48	1.3262e-08	-4.55555e-55	4.61264e-78	4.57649e-22
1833.31	-5.03737e-06	3.0039e-08	4.45335e-91	9.79369e-23	-1.95694e-36	-8.52974e-50	3.0039e-08	-2.37577e-56	2.63738e-76	2.26259e-21
1833.95	4.80086e-06	6.56471e-08	2.68957e-89	3.82865e-22	-1.6421e-37	-4.45251e-51	6.56471e-08	-1.19383e-57	1.43644e-74	1.08297e-20
1834.59	1.81079e-05	1.38419e-07	1.55592e-87	1.46539e-21	-1.32292e-38	-2.23142e-52	1.38419e-07	-5.78028e-59	7.45239e-73	5.01844e-20
1835.24	2.80276e-05	2.81597e-07	8.62176e-86	5.49126e-21	-1.02323e-39	-1.07366e-53	2.81597e-07	-2.69668e-60	3.68294e-71	2.25142e-19
1835.88	3.03562e-05	5.52729e-07	4.57628e-84	2.01465e-20	-7.59841e-41	-4.9598e-55	5.52729e-07	-1.21222e-61	1.73375e-69	9.77878e-19
1836.52	2.66679e-05	1.04676e-06	2.32668e-82	7.23663e-20	-5.41729e-42	-2.19973e-56	1.04676e-06	-5.25058e-63	7.77446e-68	4.11197e-18
1837.17	2.24221e-05	1.91264e-06	1.1331e-80	2.54497e-19	-3.70809e-43	-9.36663e-58	1.91264e-06	-2.19132e-64	3.32083e-66	1.67399e-17
1837.81	2.13012e-05	3.37188e-06	5.28572e-79	8.76272e-19	-2.43684e-44	-3.82919e-59	3.37188e-06	-8.812e-66	1.35118e-64	6.59775e-17
1838.45	2.28896e-05	5.73536e-06	2.36183e-77	2.95396e-18	-1.53749e-45	-1.50293e-60	5.73536e-06	-3.41441e-67	5.2369e-63	2.51754e-16
1839.09	2.49388e-05	9.41242e-06	1.01088e-75	9.74943e-18	-9.31341e-47	-5.66344e-62	9.41242e-06	-1.27477e-68	1.93342e-61	9.30025e-16
1839.74	2.59007e-05	1.49037e-05	4.14437e-74	3.15038e-17	-5.41643e-48	-2.04895e-63	1.49037e-05	-4.58581e-70	6.7994e-60	3.32623e-15
1840.38	2.60486e-05	2.27686e-05	1.62751e-72	9.96684e-17	-3.02432e-49	-7.11689e-65	2.27686e-05	-1.58955e-71	2.27775e-58	1.15172e-14
1841.02	2.72762e-05	3.35607e-05	6.12203e-71	3.08717e-16	-1.62125e-50	-2.37334e-66	3.35607e-05	-5.30891e-73	7.26834e-57	3.86083e-14
1841.67	3.16075e-05	4.77285e-05	2.20584e-69	9.36211e-16	-8.34415e-52	-7.59866e-68	4.77285e-05	-1.70847e-74	2.2093e-55	1.253e-13
1842.31	3.98334e-05	6.549e-05	7.61307e-68	2.77969e-15	-4.12309e-53	-2.33574e-69	6.549e-05	-5.29765e-76	6.39688e-54	3.93698e-13
1842.95	5.14632e-05	8.67009e-05	2.51682e-66	8.0803e-15	-1.95602e-54	-6.89319e-71	8.67009e-05	-1.58282e-77	1.7643e-52	1.1976e-12
1843.59	6.57936e-05	0.000110745	7.96989e-65	2.29969e-14	-8.90907e-56	-1.9531e-72	0.000110745	-4.5567e-79	4.63521e-51	3.52694e-12
1844.24	8.24342e-05	0.000136482	2.41746e-63	6.40796e-14	-3.89584e-57	-5.313e-74	0.000136482	-1.26399e-80	1.16e-49	1.0056e-11
1844.88	0.000101077	0.000162285	7.0238e-62	1.74815e-13	-1.6356e-58	-1.3876e-75	0.000162285	-3.37836e-82	2.76528e-48	2.77579e-11
1845.52	0.000120194	0.00018618	1.95476e-60	4.66927e-13	-6.59272e-60	-3.47933e-77	0.00018618	-8.70047e-84	6.27932e-47	7.41804e-11
1846.17	0.000136974	0.000206081	5.21098e-59	1.22104e-12	-2.55129e-61	-8.37601e-79	0.000206081	-2.15899e-85	1.35824e-45	1.91924e-10
1846.81	0.000148292	0.000220088	1.33062e-57	3.1262e-12	-9.47907e-63	-1.93592e-80	0.000220088	-5.16216e-87	2.79856e-44	4.80737e-10
1847.45	0.000153734	0.000226781	3.25458e-56	7.83638e-12	-3.38127e-64	-4.29584e-82	0.00022678	-1.18928e-88	5.49268e-43	1.1658e-09
1848.09	0.000155388	0.00022546	7.62505e-55	1.92319e-11	-1.15798e-65	-9.15202e-84	0.000225457	-2.64004e-90	1.02689e-41	2.73703e-09
1848.74	0.000155878	0.000216266	1.71119e-53	4.62104e-11	-3.80746e-67	-1.87195e-85	0.000216259	-5.64686e-92	1.82877e-40	6.22118e-09
1849.38	0.000156129	0.000200155	3.6784e-52	1.08709e-10	-1.20192e-68	-3.67606e-87	0.000200142	-1.1638e-93	3.10231e-39	1.369e-08
1850.02	0.000156156	0.00017874	7.57404e-51	2.50382e-10	-3.64273e-70	-6.93073e-89	0.000178711	-2.3111e-95	5.01306e-38	2.91659e-08
1850.66	0.000156268	0.000154024	1.49384e-49	5.64609e-10	-1.05995e-71	-1.25454e-90	0.000153963	-4.42214e-97	7.71637e-37	6.01566e-08
1851.31	0.000155988	0.000128099	2.82218e-48	1.24653e-09	-2.96111e-73	-2.18021e-92	0.000127977	-8.15304e-99	1.1314e-35	1.20124e-07
1851.95	0.00015261	0.000102871	5.1071e-47	2.69443e-09	-7.94205e-75	-3.63767e-94	0.000102636	-1.44836e-100	1.58019e-34	2.32228e-07
1852.59	0.000144045	7.98587e-05	8.8526e-46	5.70218e-09	-2.04512e-76	-5.82714e-96	7.94183e-05	-2.47918e-102	2.1023e-33	4.34649e-07
1853.24	0.000132772	6.00908e-05	1.46985e-44	1.18147e-08	-5.0561e-78	-8.96185e-98	5.92914e-05	-4.08895e-104	2.66424e-32	7.8759e-07
1853.88	0.000122777	4.4114e-05	2.33767e-43	2.39672e-08	-1.20011e-79	-1.32327e-99	4.27084e-05	-6.49811e-106	3.2162e-31	1.38166e-06
1854.52	0.00011583	3.20758e-05	3.56123e-42	4.76014e-08	-2.73486e-81	-1.8759e-101	2.96816e-05	-9.95026e-108	3.69833e-30	2.3466e-06
1855.16	0.000111969	2.38537e-05	5.19666e-41	9.25617e-08	-5.98355e-83	-2.55316e-103	1.99027e-05	-1.4681e-109	4.05098e-29	3.85847e-06
1855.81	0.000110744	1.91947e-05	7.26365e-40	1.76219e-07	-1.25687e-84	-3.33624e-105	1.28762e-05	-2.08711e-111	4.22676e-28	6.14228e-06
1856.45	0.000111072	1.78322e-05	9.72507e-39	3.28461e-07	-2.53474e-86	-4.18547e-107	8.03741e-06	-2.85897e-113	4.20094e-27	9.46636e-06
1857.09	0.000109601	1.95645e-05	1.2472e-37	5.99409e-07	-4.90776e-88	-5.04128e-109	4.84055e-06	-3.77352e-115	3.97719e-26	1.41246e-05
1857.74	0.000104268	2.42872e-05	1.5321e-36	1.07096e-06	-9.12312e-90	-5.82971e-111	2.81271e-06	-4.79905e-117	3.58674e-25	2.04035e-05
1858.38	9.88693e-05	3.1985e-05	1.8028e-35	1.87341e-06	-1.62822e-91	-6.47235e-113	1.57691e-06	-5.8808e-119	3.08116e-24	2.85347e-05
1859.02	0.000100473	4.26963e-05	2.03194e-34	3.20849e-06	-2.78991e-93	-6.899e-115	8.52983e-07	-6.94949e-121	2.52129e-23	3.86349e-05
1859.66	0.000112431	5.64687e-05	2.19373e-33	5.37996e-06	-4.58963e-95	-7.06024e-117	4.45169e-07	-5.66011e-122	1.96527e-22	5.06436e-05
1860.31	0.000130831	7.33262e-05	2.26862e-32	8.83216e-06	-7.24893e-97	-6.93684e-119	2.24161e-07	-3.93116e-120	1.45919e-21	6.42699e-05
1860.95	0.000149501	9.32688e-05	2.24723e-31	1.41959e-05	-1.09921e-98	-6.54354e-121	1.08905e-07	-3.0615e-118	1.03204e-20	7.8964e-05
1861.59	0.000165266	0.000116317	2.13227e-30	2.23393e-05	-1.60027e-100	-5.92616e-123	5.10489e-08	-2.30042e-116	6.95299e-20	9.39266e-05
1862.24	0.000178459	0.000142606	1.93794e-29	3.44181e-05	-2.23675e-102	-5.1528e-125	2.30875e-08	-1.66776e-114	4.4621e-19	0.000108165
1862.88	0.000192358	0.000172521	1.68713e-28	5.19173e-05	-3.00159e-104	-4.30152e-127	1.00744e-08	-1.16657e-112	2.72771e-18	0.000120593
1863.52	0.00021396	0.000206844	1.40689e-27	7.66738e-05	-3.86716e-106	-3.44754e-129	4.24141e-09	-7.87294e-111	1.58837e-17	0.000130166
1864.16	0.000250002	0.000246889	1.12378e-26	0.000110864	-4.78348e-108	-2.65281e-131	1.72288e-09	-5.12644e-109	8.81038e-17	0.000136023
1864.81	0.000300743	0.000294559	8.59822e-26	0.000156944	-5.68073e-110	-1.9598e-133	6.75228e-10	-3.22067e-107	4.65512e-16	0.000137614
1865.45	0.000358943	0.000352313	6.30148e-25	0.000217525	-6.47699e-112	-1.39004e-135	2.55327e-10	-1.95222e-105	2.34293e-15	0.000134788
1866.09	0.000418316	0.000422991	4.42368e-24	0.000295176	-7.09009e-114	-9.46569e-138	9.31527e-11	-1.14173e-103	1.12326e-14	0.000127815
1866.74	0.000482223	0.000509501	2.97462e-23	0.000392161	-7.45142e-116	-6.18851e-140	3.27903e-11	-6.44239e-102	5.12969e-14	0.00011734
1867.38	0.0005612	0.000614393	1.91596e-22	0.000510101	-7.51858e-118	-3.88444e-142	1.11364e-11	-3.50738e-100	2.23149e-13	0.000104292
1868.02	0.000666054	0.000739358	1.18208e-21	0.000649617	-7.28352e-120	-2.34089e-144	3.64921e-12	-1.84234e-98	9.24681e-13	8.97417e-05
1868.66	0.000802235	0.000884729	6.98581e-21	0.000809968	-6.77418e-122	-1.35438e-146	1.15372e-12	-9.33704e-97	3.6499e-12	7.47611e-05
1869.31	0.000967666	0.00104905	3.9545e-20	0.000988754	-6.04896e-124	-7.5234e-149	3.51931e-13	-4.56562e-95	1.37234e-11	6.0297e-05
1869.95	0.00115461	0.00122881	2.14424e-19	0.00118173	-5.18577e-126	-4.45504e-151	1.03577e-13	-2.15398e-93	4.91512e-11	4.70818e-05
1870.59	0.00135321	0.00141838	1.11369e-18	0.00138279	-4.26832e-128	-3.54753e-150	2.94118e-14	-9.80469e-92	1.67687e-10	3.55918e-05
1871.23	0.00155602	0.00161023	5.54064e-18	0.00158418	-3.45349e-130	-2.75986e-148	8.05807e-15	-4.30604e-90	5.44949e-10	2.60486e-05
1871.88	0.00175802	0.00179536	2.64036e-17	0.0017769	-7.88333e-130	-2.08841e-146	2.13006e-15	-1.82463e-88	1.68696e-09	1.84568e-05
1872.52	0.00195154	0.001964	1.20524e-16	0.00195133	-7.39463e-128	-1.53624e-144	5.43255e-16	-7.45969e-87	4.97446e-09	1.2661e-05
1873.16	0.00212308	0.00210644	5.26975e-16	0.00209802	-6.71408e-126	-1.09854e-142	1.3368e-16	-2.94252e-85	1.39727e-08	8.40849e-06
1873.81	0.00225811	0.00221393	2.20706e-15	0.00220849	-5.88177e-124	-7.63637e-141	3.17381e-17	-1.11987e-83	3.73856e-08	5.40637e-06
1874.45	0.00234455	0.00227956	8.8541e-15	0.0022761	-4.97142e-122	-5.16028e-139	7.27022e-18	-4.11216e-82	9.52845e-08	3.36536e-06
1875.09	0.00237579	0.00229892	3.40237e-14	0.00229666	-4.0542e-120	-3.3898e-137	1.60681e-18	-1.45688e-80	2.3133e-07	2.02813e-06
1875.73	0.00234838	0.0022706	1.25235e-13	0.00226888	-3.18992e-118	-2.16466e-135	3.42637e-19	-4.97997e-79	5.34975e-07	1.18331e-06
1876.38	0.00226305	0.00219635	4.41548e-13	0.0021945	-2.42163e-116	-1.34376e-133	7.04943e-20	-1.64241e-77	1.17849e-06	6.68406e-07
1877.02	0.00212574	0.00208096	1.4912e-12	0.00207812	-1.77372e-114	-8.10897e-132	1.39935e-20	-5.22624e-76	2.47294e-06	3.65527e-07
1877.66	0.0019486	0.00193184	4.82393e-12	0.0019267	-1.25347e-112	-4.75692e-130	2.68009e-21	-1.60453e-74	4.94301e-06	1.93525e-07
1878.31	0.00174898	0.00175842	1.49477e-11	0.00174891	-8.54665e-111	-2.71269e-128	4.95248e-22	-4.75288e-73	9.41155e-06	9.91959e-08
1878.95	0.00154443	0.0015714	4.43662e-11	0.00155428	-5.62249e-109	-1.5038e-126	8.82976e-23	-1.35837e-71	1.70696e-05	4.92253e-08
1879.59	0.00134733	0.0013819	1.26136e-10	0.00135239	-3.56872e-107	-8.10388e-125	1.51889e-23	-3.74567e-70	2.94902e-05	2.36494e-08
1880.23	0.00116628	0.00120062	3.43503e-10	0.00115208	-2.18548e-105	-4.24533e-123	2.52089e-24	-9.96536e-69	4.85315e-05	1.1e-08
1880.88	0.00100914	0.00103697	8.96047e-10	0.000960889	-1.29132e-103	-2.16194e-121	4.03677e-25	-2.55804e-67	7.60786e-05	4.95338e-09
1881.52	0.000882444	0.000898254	2.23891e-09	0.000784645	-7.36159e-102	-1.07027e-119	6.23685e-26	-6.3354e-66	0.000113604	2.15948e-09
1882.16	0.000787126	0.000788908	5.35859e-09	0.000627311	-4.04912e-100	-5.15056e-118	9.29711e-27	-1.51388e-64	0.00016159	9.11455e-10
1882.81	0.000718236	0.000709979	1.22849e-08	0.000491024	-2.14883e-98	-2.40953e-116	1.33716e-27	-3.49029e-63	0.000218943	3.72443e-10
1883.45	0.000667973	0.000658902	2.69773e-08	0.000376297	-1.10026e-96	-1.09578e-114	1.85553e-28	-7.76393e-62	0.000282577	1.4734e-10
1884.09	0.000628589	0.0006298	5.67456e-08	0.000282338	-5.43547e-95	-4.84433e-113	2.4843e-29	-1.6663e-60	0.000347405	5.64317e-11
1884.73	0.000593367	0.000614362	1.14334e-07	0.000207404	-2.59079e-93	-2.08194e-111	3.20917e-30	-3.45045e-59	0.000406843	2.09248e-11
1885.38	0.000559315	0.000603236	2.20659e-07	0.000149168	-1.19146e-91	-8.69888e-110	3.99974e-31	-6.89368e-58	0.000453848	7.51173e-12
1886.02	0.000528004	0.00058771	4.07921e-07	0.000105037	-5.28659e-90	-3.53492e-108	4.80975e-32	-1.32885e-56	0.000482265	2.61069e-12
1886.66	0.00050152	0.000561287	7.22334e-07	7.2415e-05	-2.26321e-88	-1.39925e-106	5.58039e-33	-2.47146e-55	0.00048815	8.78436e-13
1887.31	0.000477784	0.000520772	1.2252e-06	4.88816e-05	-9.34812e-87	-5.42983e-105	6.24681e-34	-4.43489e-54	0.000470666	2.86156e-13
1887.95	0.000453152	0.000466581	1.99059e-06	3.23115e-05	-3.72543e-85	-2.1174e-103	6.74688e-35	-7.67826e-53	0.000432279	9.02471e-14
1888.59	0.000427218	0.000402212	3.09788e-06	2.09261e-05	-1.43245e-83	-9.00986e-102	7.03071e-36	-1.28261e-51	0.000378188	2.75551e-14
1889.23	0.000401948	0.000333089	4.618e-06	1.33021e-05	-5.31414e-82	-5.00647e-100	7.06882e-37	-2.06717e-50	0.000315169	8.14536e-15
1889.88	0.000376407	0.000265136	6.59402e-06	8.35124e-06	-1.90213e-80	-4.09991e-98	6.85719e-38	-3.21448e-49	0.000250191	2.33107e-15
1890.52	0.000344489	0.00020349	9.0189e-06	5.28446e-06	-6.56895e-79	-4.30824e-96	6.41795e-39	-4.82277e-48	0.000189187	6.45863e-16
1891.16	0.000299807	0.000151662	1.18158e-05	3.57493e-06	-2.18879e-77	-4.8352e-94	5.7956e-40	-6.98126e-47	0.000136271	1.73246e-16
1891.81	0.000241586	0.000111255	1.48279e-05	2.92833e-06	-7.03663e-76	-5.33196e-92	5.04954e-41	-9.75039e-46	9.3499e-05	4.49908e-17
1892.45	0.000175726	8.2199e-05	1.7824e-05	3.26632e-06	-2.18261e-74	-5.62861e-90	4.24479e-42	-1.3139e-44	6.11087e-05	1.13116e-17
1893.09	0.000111908	6.32918e-05	2.05227e-05	4.72458e-06	-6.53188e-73	-5.6465e-88	3.4428e-43	-1.70825e-43	3.80445e-05	2.75334e-18
1893.73	5.87554e-05	5.28583e-05	2.26346e-05	7.66199e-06	-1.88605e-71	-5.37204e-86	2.69414e-44	-2.14287e-42	2.25617e-05	6.48837e-19
1894.38	2.06494e-05	4.93288e-05	2.39121e-05	1.26716e-05	-5.25433e-70	-4.84432e-84	2.03413e-45	-2.59351e-41	1.27451e-05	1.4803e-19
1895.02	-5.89526e-07	5.16335e-05	2.41974e-05	2.05779e-05	-1.41232e-68	-4.13989e-82	1.48179e-46	-3.02854e-40	6.85818e-06	3.26966e-20
1895.66	-4.59445e-06	5.93716e-05	2.34545e-05	3.24017e-05	-3.66271e-67	-3.35263e-80	1.04148e-47	-3.41217e-39	3.51533e-06	6.99186e-21
1896.3	8.29023e-06	7.27635e-05	2.17767e-05	4.92704e-05	-9.16478e-66	-2.57288e-78	7.06256e-49	-3.70918e-38	1.71638e-06	1.44751e-21
1896.95	3.63157e-05	9.24265e-05	1.93671e-05	7.22611e-05	-2.21255e-64	-1.87105e-76	4.6209e-50	-3.89025e-37	7.9828e-07	2.90128e-22
1897.59	7.79716e-05	0.000119028	1.64985e-05	0.000102176	-5.15365e-63	-1.28939e-74	2.91704e-51	-3.93666e-36	3.53662e-07	5.62982e-23
1898.23	0.000130802	0.000152883	1.34626e-05	0.000139271	-1.15821e-61	-8.42007e-73	1.77668e-52	-3.84353e-35	1.4925e-07	1.05764e-23
1898.88	0.000189838	0.00019357	1.05226e-05	0.000182988	-2.51139e-60	-5.2105e-71	1.04406e-53	-3.62062e-34	5.99974e-08	1.92363e-24
1899.52	0.000248523	0.000239655	7.87811e-06	0.000231754	-5.254e-59	-3.05545e-69	5.91966e-55	-3.2907e-33	2.29758e-08	3.38721e-25
1900.16	0.000302025	0.000288585	5.64974e-06	0.000282927	-1.06052e-57	-1.69787e-67	3.23831e-56	-2.88566e-32	8.38933e-09	5.77432e-26
1900.8	0.000347524	0.000336822	3.88099e-06	0.000332938	-2.06536e-56	-8.94058e-66	1.70919e-57	-2.44147e-31	2.9614e-09	9.53011e-27
1901.45	0.000382345	0.000380207	2.55366e-06	0.000377652	-3.88085e-55	-4.46128e-64	8.70391e-59	-1.99302e-30	1.20501e-09	1.52277e-27
1902.09	0.000403738	0.000414526	1.6095e-06	0.000412915	-7.03572e-54	-2.10953e-62	4.27651e-60	-1.56972e-29	1.37358e-09	2.35563e-28
1902.73	0.000410361	0.000436158	9.71682e-07	0.000435182	-1.23067e-52	-9.45243e-61	2.02729e-61	-1.19284e-28	4.42543e-09	3.52793e-29
1903.38	0.000402007	0.000442679	5.61908e-07	0.000442101	-2.07695e-51	-4.0136e-59	9.27243e-63	-8.74572e-28	1.60774e-08	5.11529e-30
1904.02	0.000379753	0.000433291	3.11254e-07	0.000432925	-3.38191e-50	-1.61494e-57	4.09188e-64	-6.18671e-27	5.43445e-08	7.18057e-31
1904.66	0.000347624	0.000408976	1.65149e-07	0.000408643	-5.31312e-49	-6.15762e-56	1.74222e-65	-4.22256e-26	1.68143e-07	9.75856e-32
1905.3	0.000312567	0.000372365	8.39408e-08	0.000371806	-8.05357e-48	-2.22485e-54	7.15708e-67	-2.78063e-25	4.7559e-07	1.28396e-32
1905.95	0.000279642	0.000327354	4.08832e-08	0.000326084	-1.17782e-46	-7.61765e-53	2.83674e-68	-1.76669e-24	1.22964e-06	1.63552e-33
1906.59	0.000247538	0.000278591	1.91154e-08	0.000275665	-1.66196e-45	-2.47158e-51	1.08481e-69	-1.08301e-23	2.90609e-06	2.01696e-34
1907.23	0.00021189	0.000230921	8.66954e-09	0.000224634	-2.26263e-44	-7.59905e-50	4.00258e-71	-6.40549e-23	6.27808e-06	2.40812e-35
1907.88	0.000173931	0.000188847	4.03282e-09	0.000176445	-2.97206e-43	-2.214e-48	1.42488e-72	-3.65532e-22	1.23974e-05	2.78353e-36
1908.52	0.000141806	0.000155974	2.41774e-09	0.000133593	-3.76663e-42	-6.11261e-47	4.89403e-74	-2.01256e-21	2.23779e-05	3.11497e-37
1909.16	0.000123425	0.000134425	2.68468e-09	9.74991e-05	-4.60574e-41	-1.59922e-45	1.62184e-75	-1.06912e-20	3.69227e-05	3.37481e-38
1909.8	0.000118631	0.000124281	4.78803e-09	6.85894e-05	-5.43373e-40	-3.96483e-44	5.18559e-77	-5.47963e-20	5.56871e-05	3.53983e-39
1910.45	0.000121101	0.000123292	9.61853e-09	4.65107e-05	-6.18511e-39	-9.31475e-43	1.59971e-78	-2.70975e-19	7.67716e-05	3.59463e-40
1911.09	0.000123788	0.000127166	1.91442e-08	3.04012e-05	-6.7928e-38	-2.07372e-41	4.76141e-80	-1.29288e-18	9.6746e-05	3.53399e-41
1911.73	0.000123331	0.000130634	3.67724e-08	1.91544e-05	-7.19782e-37	-4.37485e-40	1.36736e-81	-5.95168e-18	0.000111443	3.36367e-42
1912.38	0.000118165	0.000129043	6.78465e-08	1.16329e-05	-7.35876e-36	-8.74596e-39	3.7886e-83	-2.64345e-17	0.000117342	3.09956e-43
1913.02	0.00010667	0.000119869	1.20144e-07	6.80996e-06	-7.25872e-35	-1.65685e-37	1.01281e-84	-1.13281e-16	0.000112939	2.7652e-44
1913.66	8.8388e-05	0.000103409	2.04166e-07	3.84277e-06	-6.90823e-34	-2.97436e-36	2.61232e-86	-4.68372e-16	9.9362e-05	2.3883e-45
1914.3	6.66309e-05	8.23295e-05	3.32938e-07	2.09018e-06	-6.34343e-33	-5.05983e-35	6.50097e-88	-1.86843e-15	7.99064e-05	1.99706e-46
1914.95	4.77284e-05	6.03562e-05	5.21e-07	1.09588e-06	-5.61997e-32	-8.15661e-34	1.56092e-89	-7.19142e-15	5.87393e-05	1.61671e-47
1915.59	3.58791e-05	4.08057e-05	7.82362e-07	5.53841e-07	-4.8039e-31	-1.24599e-32	3.61606e-91	-2.67057e-14	3.94695e-05	1.2671e-48
1916.23	2.96269e-05	2.56399e-05	1.12739e-06	2.69803e-07	-3.96193e-30	-1.80366e-31	8.13819e-93	-9.56851e-14	2.42427e-05	9.61451e-50
1916.87	2.44089e-05	1.52965e-05	1.55895e-06	1.26692e-07	-3.15261e-29	-2.47415e-30	3.57243e-93	-3.30777e-13	1.36109e-05	7.06289e-51
1917.52	1.7495e-05	9.11116e-06	2.06866e-06	5.73444e-08	-2.42039e-28	-3.21611e-29	1.98704e-91	-1.10326e-12	6.98516e-06	5.02315e-52
1918.16	1.07708e-05	5.93598e-06	2.63414e-06	2.50193e-08	-1.79288e-27	-3.96156e-28	1.11556e-89	-3.55037e-12	3.27682e-06	3.45866e-53
1918.8	7.12796e-06	4.63437e-06	3.21874e-06	1.0522e-08	-1.28135e-26	-4.62418e-27	6.01408e-88	-1.10235e-11	1.40513e-06	2.30557e-54
1919.45	6.80933e-06	4.32921e-06	3.77421e-06	4.26542e-09	-8.83562e-26	-5.11489e-26	3.11436e-86	-3.3023e-11	5.50761e-07	1.48794e-55
1920.09	5.84092e-06	4.44571e-06	4.24681e-06	1.66674e-09	-5.87838e-25	-5.36129e-25	1.55053e-84	-9.54478e-11	1.97332e-07	9.29679e-57
1920.73	-1.40899e-06	4.65057e-06	4.58558e-06	6.27787e-10	-3.77337e-24	-5.32519e-24	7.43964e-83	-2.66174e-10	6.46274e-08	5.62365e-58
1921.37	-1.48798e-05	4.77025e-06	4.75139e-06	2.27928e-10	-2.33696e-23	-5.01226e-23	3.46192e-81	-7.16172e-10	1.93474e-08	3.29338e-59
1922.02	-2.75445e-05	4.72787e-06	4.72435e-06	7.97672e-11	-1.39645e-22	-4.47058e-22	1.5866e-79	-1.85917e-09	5.29437e-09	1.86725e-60
1922.66	-3.02006e-05	4.50444e-06	4.50774e-06	2.69086e-11	-8.05105e-22	-3.77857e-21	7.40671e-78	-4.65666e-09	1.32431e-09	1.02495e-61
1923.3	-2.20981e-05	4.11641e-06	4.12735e-06	8.74981e-12	-4.47847e-21	-3.02637e-20	3.73324e-76	-1.12533e-08	3.02799e-10	5.44681e-63
1923.95	-1.05e-05	3.60025e-06	3.62642e-06	2.7425e-12	-2.40358e-20	-2.29694e-19	2.15996e-74	-2.62384e-08	6.32854e-11	2.80233e-64
1924.59	-1.67469e-06	2.99859e-06	3.0576e-06	8.28582e-13	-1.24462e-19	-1.652e-18	1.44833e-72	-5.90262e-08	1.20903e-11	1.39583e-65
1925.23	5.48932e-06	2.34577e-06	2.47388e-06	2.41304e-13	-6.21826e-19	-1.12591e-17	1.06491e-70	-1.28116e-07	2.11134e-12	6.73111e-67
1925.87	1.51658e-05	1.65246e-06	1.92075e-06	6.77383e-14	-2.99745e-18	-7.27158e-17	8.0165e-69	-2.68297e-07	3.37027e-13	3.14252e-68
1926.52	2.86526e-05	8.88966e-07	1.43106e-06	1.83292e-14	-1.39407e-17	-4.45027e-16	5.90253e-67	-5.42099e-07	4.91765e-14	1.42039e-69
1927.16	4.05981e-05	-3.36412e-08	1.02316e-06	4.78074e-15	-6.25563e-17	-2.58093e-15	4.15372e-65	-1.0568e-06	6.55897e-15	6.21551e-71
1927.8	4.33446e-05	-1.28576e-06	7.01973e-07	1.20195e-15	-2.70837e-16	-1.4184e-14	2.76478e-63	-1.98773e-06	7.99649e-16	2.6332e-72
1928.45	3.28966e-05	-3.14507e-06	4.62162e-07	2.91285e-16	-1.13135e-15	-7.38675e-14	1.73281e-61	-3.60723e-06	8.91147e-17	1.08001e-73
1929.09	1.33274e-05	-6.02401e-06	2.91986e-07	6.80441e-17	-4.55969e-15	-3.64536e-13	1.02062e-59	-6.316e-06	9.07789e-18	4.28856e-75
1929.73	-6.07397e-06	-1.04929e-05	1.77022e-07	1.53216e-17	-1.77307e-14	-1.70475e-12	5.64459e-58	-1.06699e-05	8.45291e-19	1.64867e-76
1930.37	-1.87604e-05	-1.72883e-05	1.02988e-07	3.3255e-18	-6.65225e-14	-7.55461e-12	2.9302e-56	-1.73913e-05	7.19471e-20	6.13611e-78
1931.02	-2.54529e-05	-2.72923e-05	5.74962e-08	6.95747e-19	-2.40803e-13	-3.17246e-11	1.42752e-54	-2.73498e-05	5.59766e-21	2.21101e-79
1931.66	-3.18342e-05	-4.14673e-05	3.08027e-08	1.40309e-19	-8.41022e-13	-1.26245e-10	6.52615e-53	-4.1498e-05	3.98094e-22	7.71308e-81
1932.3	-4.40902e-05	-6.07355e-05	1.58355e-08	2.72748e-20	-2.83403e-12	-4.76061e-10	2.79965e-51	-6.07508e-05	2.58792e-23	2.60497e-82
1932.95	-6.51022e-05	-8.5802e-05	7.81219e-09	5.11066e-21	-9.21407e-12	-1.70115e-09	1.12698e-49	-8.58081e-05	1.5378e-24	8.51757e-84
1933.59	-9.29573e-05	-0.00011694	3.69835e-09	9.23066e-22	-2.89035e-11	-5.76047e-09	4.25688e-48	-0.000116938	8.35291e-26	2.69629e-85
1934.23	-0.000122263	-0.000153774	1.68011e-09	1.60705e-22	-8.74784e-11	-1.84844e-08	1.50878e-46	-0.000153757	4.14725e-27	8.26337e-87
1934.87	-0.000150066	-0.000195114	7.32424e-10	2.69691e-23	-2.55448e-10	-5.62061e-08	5.01786e-45	-0.000195059	1.88221e-28	2.4518e-88
1935.52	-0.000180069	-0.000238914	3.06396e-10	4.36259e-24	-7.19708e-10	-1.61955e-07	1.56592e-43	-0.000238752	7.8084e-30	7.0429e-90
1936.16	-0.000218709	-0.000282399	1.22998e-10	6.80242e-25	-1.95641e-09	-4.4222e-07	4.58544e-42	-0.000281955	2.96102e-31	1.95865e-91
1936.8	-0.000265682	-0.000322415	4.73815e-11	1.0224e-25	-5.13117e-09	-1.14423e-06	1.25994e-40	-0.000321266	1.02638e-32	5.27351e-93
1937.44	-0.00031192	-0.000356002	1.75152e-11	1.48123e-26	-1.29845e-08	-2.80558e-06	3.24845e-39	-0.000353183	3.25206e-34	1.37461e-94
1938.09	-0.000346822	-0.000381167	6.2132e-12	2.06853e-27	-3.17017e-08	-6.51874e-06	7.85887e-38	-0.000374617	9.41881e-36	3.46897e-96
1938.73	-0.000366839	-0.000397804	2.11501e-12	2.78447e-28	-7.4678e-08	-1.43528e-05	1.78403e-36	-0.000383377	2.49356e-37	8.47537e-98
1939.37	-0.00037883	-0.000408659	6.90881e-13	3.61296e-29	-1.69728e-07	-2.99463e-05	3.80017e-35	-0.000378543	6.03432e-39	2.00473e-99
1940.02	-0.000395798	-0.000420206	2.16566e-13	4.51882e-30	-3.72192e-07	-5.9208e-05	7.59559e-34	-0.000360626	1.33482e-40	4.59081e-101
1940.66	-0.000432774	-0.000443192	6.51435e-14	5.44788e-31	-7.87465e-07	-0.000110931	1.42455e-32	-0.000331474	2.69901e-42	1.0178e-102
1941.3	-0.000504762	-0.00049252	1.88039e-14	6.33097e-32	-1.60749e-06	-0.000196949	2.50699e-31	-0.000293964	4.9885e-44	2.18461e-104
1941.94	-0.000626257	-0.000586047	5.20859e-15	7.09175e-33	-3.16602e-06	-0.000331352	4.13986e-30	-0.00025153	8.42796e-46	4.53966e-106
1942.59	-0.000810697	-0.00074194	1.38448e-15	7.65733e-34	-6.01634e-06	-0.000528272	6.41469e-29	-0.000207652	1.30155e-47	9.13296e-108
1943.23	-0.00107223	-0.00097453	3.53142e-16	7.9697e-35	-1.10307e-05	-0.0007981	9.32662e-28	-0.000165399	1.83732e-49	1.77884e-109
1943.87	-0.00142276	-0.00128921	8.64384e-17	7.99558e-36	-1.9513e-05	-0.00114259	1.27242e-26	-0.000127111	2.3708e-51	3.3543e-111
1944.52	-0.00186237	-0.00167764	2.0303e-17	7.73462e-37	-3.33039e-05	-0.00155008	1.6289e-25	-9.42507e-05	2.79634e-53	6.12358e-113
1945.16	-0.0023632	-0.00211501	4.57622e-18	7.33597e-38	-5.48428e-05	-0.00199275	1.95667e-24	-6.74275e-05	3.01489e-55	1.0823e-114
1945.8	-0.00286149	-0.00256129	9.89806e-19	1.27281e-38	-8.71354e-05	-0.00242763	2.20546e-23	-4.65418e-05	2.97125e-57	1.85194e-116
1946.44	-0.00327268	-0.00296703	2.05442e-19	3.04996e-38	-0.000133574	-0.00280249	2.33258e-22	-3.09962e-05	2.67665e-59	3.06792e-118
1947.09	-0.00352475	-0.00328316	4.09187e-20	1.41221e-37	-0.00019756	-0.00306577	2.31491e-21	-1.99186e-05	2.2041e-61	4.9204e-120
1947.73	-0.00358908	-0.00347219	7.82078e-21	6.55534e-37	-0.000281922	-0.00317809	2.1557e-20	-1.23541e-05	1.65904e-63	7.64002e-122
1948.37	-0.00348833	-0.00351715	1.43441e-21	2.9974e-36	-0.000388159	-0.00312195	1.88365e-19	-7.40393e-06	1.14148e-65	1.14849e-123
1949.02	-0.00327746	-0.00342538	2.5246e-22	1.34962e-35	-0.000515634	-0.00290615	1.54444e-18	-4.3082e-06	7.17899e-68	1.67147e-125
1949.66	-0.00301659	-0.00322556	4.26389e-23	5.98403e-35	-0.000660884	-0.00256355	1.18823e-17	-2.48136e-06	4.1271e-70	2.35509e-127
1950.3	-0.00275233	-0.00295918	6.9106e-24	2.6127e-34	-0.000817259	-0.00214289	8.578e-17	-1.51615e-06	2.16877e-72	3.21259e-129
1950.94	-0.00251282	-0.00266933	1.07478e-24	1.12332e-33	-0.000975093	-0.00169742	5.81073e-16	-1.17179e-06	1.04176e-74	4.24269e-131
1951.59	-0.0023087	-0.00239065	1.60406e-25	4.75585e-33	-0.00112249	-0.00127413	3.69346e-15	-1.35861e-06	4.57412e-77	5.42458e-133
1952.23	-0.00213857	-0.00214331	2.29728e-26	1.98276e-32	-0.00124673	-0.000906309	2.20289e-14	-2.12452e-06	1.83583e-79	6.71474e-135
1952.87	-0.00199374	-0.00193219	3.15721e-27	8.14003e-32	-0.00133602	-0.000610929	1.23285e-13	-3.6417e-06	6.73511e-82	8.04692e-137
1953.52	-0.00186001	-0.00175042	4.16379e-28	3.29077e-31	-0.00138135	-0.000390305	6.47423e-13	-6.18504e-06	2.25861e-84	9.33618e-139
1954.16	-0.00171962	-0.00158525	5.2695e-29	1.31004e-30	-0.00137799	-0.000236415	3.19024e-12	-1.00903e-05	6.92349e-87	1.04869e-140
1954.8	-0.00155642	-0.001424	6.39947e-30	5.13552e-30	-0.0013263	-0.000135946	1.47508e-11	-1.56814e-05	1.93997e-89	1.14042e-142
1955.44	-0.00136439	-0.00125823	7.45787e-31	1.98244e-29	-0.00123165	-7.45589e-05	6.39979e-11	-2.3166e-05	4.96877e-92	1.20065e-144
1956.09	-0.00115125	-0.0010856	8.34028e-32	7.53583e-29	-0.00110353	-3.96591e-05	2.6054e-10	-3.25129e-05	1.16329e-94	1.2238e-146
1956.73	-0.000931929	-0.000909399	8.95038e-33	2.82083e-28	-0.000953967	-2.16525e-05	9.9527e-10	-4.33446e-05	2.48952e-97	1.20765e-148
1957.37	-0.00072206	-0.000736736	9.21716e-34	1.03977e-27	-0.000795671	-1.40881e-05	3.56751e-09	-5.48872e-05	4.87e-100	1.15375e-150
1958.02	-0.000535074	-0.000576146	9.10855e-35	3.7741e-27	-0.000640302	-1.31984e-05	1.19991e-08	-6.60175e-05	8.70817e-103	1.06713e-152
1958.66	-0.000383263	-0.000435519	8.63821e-36	1.34897e-26	-0.00049715	-1.72507e-05	3.78694e-08	-7.54219e-05	1.42335e-105	9.55572e-155
1959.3	-0.000275919	-0.000320738	7.88316e-37	4.74798e-26	-0.000372427	-2.59538e-05	1.12147e-07	-8.18441e-05	2.12657e-108	8.28415e-157
1959.94	-0.00021489	-0.000235156	7.77102e-38	1.64562e-25	-0.000269183	-4.00077e-05	3.11633e-07	-8.43581e-05	2.90427e-111	6.95297e-159
1960.59	-0.000191594	-0.000179738	4.12204e-38	5.61648e-25	-0.000187718	-6.07833e-05	8.12564e-07	-8.2588e-05	3.62558e-114	5.64978e-161
1961.23	-0.000191601	-0.000153556	1.3743e-37	1.88762e-24	-0.000126305	-9.00747e-05	1.98806e-06	-7.67993e-05	4.13719e-117	4.44458e-163
1961.87	-0.000203582	-0.000154317	5.22397e-37	6.24711e-24	-8.19981e-05	-0.000129862	4.56416e-06	-6.78341e-05	4.31537e-120	3.38507e-165
1962.51	-0.000223634	-0.000178668	1.96746e-36	2.03591e-23	-5.13696e-05	-0.000182035	9.83217e-06	-5.69101e-05	4.1145e-123	2.496e-167
1963.16	-0.000248265	-0.000222227	7.31843e-36	6.53362e-23	-3.10682e-05	-0.000248062	1.98745e-05	-4.53504e-05	3.58593e-126	1.7818e-169
1963.8	-0.000267729	-0.000279419	2.68851e-35	2.06473e-22	-1.81701e-05	-0.000328613	3.76965e-05	-3.4326e-05	2.85675e-129	1.23143e-171
1964.44	-0.000270596	-0.000343381	9.75402e-35	6.42522e-22	-1.03409e-05	-0.000423179	6.7091e-05	-2.46783e-05	2.08032e-132	8.2395e-174
1965.09	-0.000256443	-0.000406254	3.49492e-34	1.96892e-21	-5.85975e-06	-0.000529759	0.000112043	-1.68522e-05	1.38475e-135	5.3374e-176
1965.73	-0.000237954	-0.000460108	1.23671e-33	5.9413e-21	-3.56279e-06	-0.000644684	0.000175577	-1.09308e-05	8.42558e-139	3.34732e-178
1966.37	-0.000230364	-0.00049847	4.32197e-33	1.76543e-20	-2.7538e-06	-0.000762659	0.000258172	-6.73433e-06	4.68613e-142	2.03237e-180
1967.01	-0.0002418	-0.000518078	1.49167e-32	5.16577e-20	-3.11818e-06	-0.000877059	0.000356215	-3.94083e-06	2.3824e-145	1.19467e-182
1967.66	-0.000273697	-0.000520163	5.08448e-32	1.48845e-19	-4.6568e-06	-0.000980487	0.000461194	-2.19044e-06	1.10713e-148	6.79876e-185
1968.3	-0.000324316	-0.000510536	1.71158e-31	4.22326e-19	-7.64301e-06	-0.00106554	0.000560312	-1.15645e-06	4.70296e-152	3.74585e-187
1968.94	-0.000387277	-0.00049808	5.69023e-31	1.17999e-18	-1.25944e-05	-0.00112567	0.000638808	-5.79924e-07	1.82612e-155	1.99806e-189
1969.59	-0.000450304	-0.000491981	1.86828e-30	3.24654e-18	-2.02428e-05	-0.00115603	0.000683513	-2.76227e-07	6.48144e-159	1.03183e-191
1970.23	-0.000499842	-0.000498644	6.05805e-30	8.79587e-18	-3.14825e-05	-0.00115409	0.00068651	-1.24972e-07	2.10281e-162	5.15872e-194
1970.87	-0.000528945	-0.000519538	1.94001e-29	2.34667e-17	-4.72768e-05	-0.00112002	0.000647544	-5.3704e-08	6.23614e-166	2.49699e-196
1971.51	-0.0005401	-0.000550842	6.13558e-29	6.16511e-17	-6.85116e-05	-0.00105664	0.000574203	-2.19206e-08	1.6905e-169	1.17012e-198
1972.16	-0.000539081	-0.000584971	1.9164e-28	1.59494e-16	-9.57975e-05	-0.000969043	0.000479819	-8.49864e-09	4.18893e-173	5.30859e-201
1972.8	-0.000528149	-0.000613191	5.91149e-28	4.06315e-16	-0.000129241	-0.00086392	0.000379947	-3.12965e-09	9.48801e-177	2.33168e-203
1973.44	-0.000505087	-0.000628161	1.80089e-27	1.01929e-15	-0.000168229	-0.000748718	0.000288776	-1.0947e-09	1.96442e-180	9.91506e-206
1974.09	-0.000467351	-0.000625439	5.41824e-27	2.51793e-15	-0.000211278	-0.00063078	0.000216614	-3.63698e-10	3.71773e-184	4.08189e-208
1974.73	-0.000417007	-0.00060362	1.60993e-26	6.12501e-15	-0.00025601	-0.000516597	0.000168986	-1.14773e-10	6.43143e-188	1.62691e-210
1975.37	-0.000362096	-0.000563472	4.72431e-26	1.46718e-14	-0.000299304	-0.000411283	0.000147114	-3.44023e-11	1.01701e-191	6.27779e-213
1976.01	-0.000313496	-0.000506786	1.36914e-25	3.46081e-14	-0.000337613	-0.000318306	0.000149132	-9.79458e-12	1.47002e-195	2.34524e-215
1976.66	-0.000277389	-0.000435574	3.91866e-25	8.03868e-14	-0.000367432	-0.000239476	0.000171334	-2.64871e-12	1.94228e-199	8.48215e-218
1977.3	-0.000249896	-0.000351922	1.10766e-24	1.83869e-13	-0.000385821	-0.000175144	0.000209043	-6.80352e-13	2.34577e-203	2.97005e-220
1977.94	-0.000220596	-0.000258383	3.09212e-24	4.14138e-13	-0.000390882	-0.000124521	0.000257021	-1.65991e-13	2.58967e-207	1.00684e-222
1978.59	-0.00018147	-0.000158518	8.52484e-24	9.18538e-13	-0.000382083	-8.60608e-05	0.000309626	-3.84666e-14	2.6133e-211	3.3044e-225
1979.23	-0.000131452	-5.72067e-05	2.32111e-23	2.00616e-12	-0.000360347	-5.78206e-05	0.000360961	-8.46708e-15	2.41057e-215	1.04994e-227
1979.87	-7.4511e-05	3.95487e-05	6.24143e-23	4.31466e-12	-0.000327896	-3.77637e-05	0.000405208	-1.77025e-15	2.03253e-219	3.2298e-230
1980.51	-1.70249e-05	0.000125341	1.6575e-22	9.13784e-12	-0.000287873	-2.39762e-05	0.00043719	-3.51549e-16	1.56653e-223	9.61886e-233
1981.16	3.38678e-05	0.000194394	4.34712e-22	1.90571e-11	-0.000243848	-1.47979e-05	0.000453039	-6.63112e-17	1.10365e-227	2.77339e-235
1981.8	7.30887e-05	0.000242613	1.12598e-21	3.91366e-11	-0.000199291	-8.87844e-06	0.000450782	-1.18806e-17	7.10778e-232	7.7417e-238
1982.44	9.87184e-05	0.000268326	2.8803e-21	7.91452e-11	-0.000157148	-5.1783e-06	0.000430652	-2.02181e-18	4.18762e-236	2.09218e-240
1983.08	0.000110324	0.000272509	7.27656e-21	1.57609e-10	-0.000119558	-2.93597e-06	0.000395003	-3.26808e-19	2.27818e-240	5.47396e-243
1983.73	0.000107315	0.000258466	1.81549e-20	3.09067e-10	-8.77611e-05	-1.6182e-06	0.000347845	-5.0176e-20	1.28491e-244	1.38657e-245
1984.37	9.215e-05	0.000231069	4.47344e-20	5.96814e-10	-6.2155e-05	-8.67013e-07	0.000294091	-7.31727e-21	1.61081e-248	3.40033e-248
1985.01	7.25684e-05	0.000195796	1.0886e-19	1.13486e-09	-4.24719e-05	-4.5158e-07	0.000238718	-1.01357e-21	6.84592e-252	8.07305e-251
1985.66	5.42835e-05	0.000157809	2.61623e-19	2.12499e-09	-2.80013e-05	-2.28643e-07	0.000186037	-1.33354e-22	3.78259e-255	1.85564e-253
1986.3	3.61505e-05	0.000121274	6.2096e-19	3.91821e-09	-1.78118e-05	-1.12537e-07	0.000139195	-1.66652e-23	2.04411e-258	4.1294e-256
1986.94	1.53328e-05	8.90111e-05	1.45556e-18	7.11433e-09	-1.09317e-05	-5.38455e-08	9.99896e-05	-1.97818e-24	1.05411e-261	8.89649e-259
1987.58	-4.40107e-06	6.24743e-05	3.36959e-18	1.27202e-08	-6.47318e-06	-2.50448e-08	6.89598e-05	-2.23033e-25	5.17857e-265	1.85562e-261
1988.23	-1.56952e-05	4.19739e-05	7.70378e-18	2.2396e-08	-3.69828e-06	-1.1324e-08	4.56611e-05	-2.3885e-26	2.42342e-268	3.74712e-264
1988.87	-1.68413e-05	2.70225e-05	1.73944e-17	3.88295e-08	-2.03861e-06	-4.97733e-09	2.90272e-05	-2.42958e-27	1.08029e-271	7.32562e-267
1989.51	-1.31235e-05	1.66963e-05	3.87879e-17	6.62929e-08	-1.08422e-06	-2.12671e-09	1.77163e-05	-2.3474e-28	4.58714e-275	1.38653e-269
1990.16	-9.52818e-06	9.9355e-06	8.54206e-17	1.11452e-07	-5.5636e-07	-8.83352e-10	1.03813e-05	-2.15423e-29	1.8554e-278	2.5407e-272
1990.8	-7.57324e-06	5.74905e-06	1.85784e-16	1.84511e-07	-2.7545e-07	-3.56677e-10	5.84034e-06	-1.8778e-30	7.14866e-282	4.50728e-275
1991.44	-7.91998e-06	3.3236e-06	3.99057e-16	3.00797e-07	-1.31578e-07	-1.40001e-10	3.15453e-06	-1.55473e-31	2.62364e-285	7.74132e-278
1992.08	-1.16283e-05	2.05802e-06	8.46526e-16	4.8288e-07	-6.0642e-08	-5.34196e-11	1.63583e-06	-1.22268e-32	9.17224e-289	1.28722e-280
1992.73	-1.70053e-05	1.55078e-06	1.77348e-15	7.63342e-07	-2.69659e-08	-1.98146e-11	8.14429e-07	-9.13316e-34	3.05449e-292	2.07219e-283
1993.37	-1.91058e-05	1.56598e-06	3.66937e-15	1.18827e-06	-1.15693e-08	-7.14471e-12	3.89293e-07	-6.48006e-35	9.68934e-296	3.22957e-286
1994.01	-1.58233e-05	1.99534e-06	7.49784e-15	1.82148e-06	-4.7891e-09	-2.50437e-12	1.78652e-07	-4.36704e-36	2.9278e-299	4.87303e-289
1994.66	-1.09673e-05	2.82627e-06	1.51308e-14	2.74947e-06	-1.91271e-09	-8.53352e-13	7.87137e-08	-2.79542e-37	8.42717e-303	7.11853e-292
1995.3	-1.08842e-05	4.11941e-06	3.01554e-14	4.08685e-06	-7.37051e-10	-2.82665e-13	3.32967e-08	-1.69963e-38	2.31054e-306	1.00675e-294
1995.94	-1.51068e-05	5.99521e-06	5.93541e-14	5.98196e-06	-2.74029e-10	-9.10185e-14	1.35226e-08	-9.81556e-40	--	1.37844e-297
1996.58	-1.56393e-05	8.62727e-06	1.15376e-13	8.6221e-06	-9.82984e-11	-2.84907e-14	5.27265e-09	-5.38424e-41	--	1.82724e-300
1997.23	-4.60114e-06	1.22396e-05	2.21493e-13	1.22376e-05	-3.40211e-11	-8.66942e-15	1.97382e-09	-2.80534e-42	--	2.34499e-303
1997.87	1.70702e-05	1.71047e-05	4.19936e-13	1.7104e-05	-1.13606e-11	-2.56444e-15	7.09405e-10	-1.38834e-43	--	2.91356e-306
1998.51	4.15939e-05	2.35405e-05	7.86298e-13	2.35403e-05	-3.66021e-12	-7.3741e-16	2.44788e-10	-6.52614e-45	0	--
1999.16	6.18224e-05	3.19037e-05	1.45402e-12	3.19037e-05	-1.13779e-12	-2.0613e-16	8.10953e-11	-2.91385e-46	0	--
1999.8	7.64979e-05	4.2578e-05	2.65543e-12	4.25779e-05	-3.41247e-13	-5.60128e-17	2.57935e-11	-1.23574e-47	0	--
2000.44	9.03379e-05	5.59556e-05	4.78936e-12	5.59556e-05	-9.87477e-14	-1.47961e-17	7.8765e-12	-4.97784e-49	0	--
2001.08	0.000106342	7.24132e-05	8.53102e-12	7.24131e-05	-2.757e-14	-3.79947e-18	2.30922e-12	-1.9046e-50	0	--
2001.73	0.000123473	9.22797e-05	1.50074e-11	9.22797e-05	-7.42674e-15	-9.48448e-19	6.49991e-13	-6.92174e-52	0	--
2002.37	0.000139843	0.0001158	2.60728e-11	0.0001158	-1.93024e-15	-2.30154e-19	1.75654e-13	-2.38934e-53	0	0
2003.01	0.00015849	0.000143096	4.47352e-11	0.000143096	-4.84033e-16	-5.42923e-20	4.55741e-14	-7.83415e-55	0	0
2003.65	0.000186592	0.000174125	7.5804e-11	0.000174125	-1.17109e-16	-1.24501e-20	1.13524e-14	-2.43981e-56	0	0
2004.3	0.000226525	0.000208646	1.26857e-10	0.000208646	-2.73374e-17	-2.77537e-21	2.71497e-15	-7.21721e-58	0	0
2004.94	0.000272853	0.000246192	2.09661e-10	0.000246192	-6.15709e-18	-6.01429e-22	6.2338e-16	-2.02784e-59	0	0
2005.58	0.000317962	0.000286057	3.42215e-10	0.000286057	-1.33797e-18	-1.26696e-22	1.3742e-16	-5.41188e-61	0	0
2006.23	0.000359846	0.0003273	5.51646e-10	0.000327299	-2.80521e-19	-2.59451e-23	2.90841e-17	-1.37187e-62	0	0
2006.87	0.000400118	0.000368769	8.78218e-10	0.000368768	-5.67463e-20	-5.16492e-24	5.90976e-18	-3.30315e-64	0	0
2007.51	0.000436934	0.000409145	1.38078e-09	0.000409144	-1.10755e-20	-9.99506e-25	1.15291e-18	-7.55431e-66	0	0
2008.15	0.000465691	0.000447009	2.144e-09	0.000447006	-2.08563e-21	-1.88028e-25	2.15937e-19	-1.64101e-67	0	0
2008.8	0.000485332	0.000480916	3.28781e-09	0.000480913	-3.78933e-22	-3.43854e-26	3.88301e-20	-3.38592e-69	0	0
2009.44	0.000499465	0.000509493	4.97929e-09	0.000509488	-6.64264e-23	-6.1128e-27	6.70378e-21	-6.63581e-71	0	0
2010.08	0.000511421	0.000531524	7.44746e-09	0.000531516	-1.12349e-23	-1.05638e-27	1.11117e-21	-1.23527e-72	0	0
2010.73	0.000520126	0.000546038	1.10009e-08	0.000546027	-1.83337e-24	-1.77466e-28	1.76827e-22	-2.18413e-74	0	0
2011.37	0.000523372	0.000552381	1.60483e-08	0.000552365	-2.88657e-25	-2.89819e-29	2.70164e-23	-3.66814e-76	0	0
2012.01	0.000522426	0.000550265	2.31212e-08	0.000550242	-4.38496e-26	-4.60099e-30	3.96292e-24	-5.85146e-78	0	0
2012.65	0.000520268	0.000539787	3.2898e-08	0.000539754	-6.42688e-27	-7.10053e-31	5.581e-25	-8.86611e-80	0	0
2013.3	0.000515717	0.000521424	4.62285e-08	0.000521378	-9.08837e-28	-1.06523e-31	7.54602e-26	-1.276e-81	0	0
2013.94	0.000504093	0.000495999	6.41549e-08	0.000495935	-1.24e-28	-1.55351e-32	9.79565e-27	-1.7443e-83	0	0
2014.58	0.000482916	0.000464615	8.79284e-08	0.000464528	-1.63235e-29	-2.20241e-33	1.22084e-27	-2.26486e-85	0	0
2015.23	0.000454111	0.000428582	1.19017e-07	0.000428463	-2.07325e-30	-3.03526e-34	1.4608e-28	-2.79326e-87	0	0
2015.87	0.000419881	0.000389321	1.59099e-07	0.000389161	-2.54064e-31	-4.06638e-35	1.67816e-29	-3.27213e-89	0	0
2016.51	0.000378339	0.000348276	2.10043e-07	0.000348066	-3.00391e-32	-5.29585e-36	1.85091e-30	-3.64084e-91	0	0
2017.15	0.000326586	0.000306828	2.73859e-07	0.000306555	-3.42674e-33	-6.70468e-37	1.95995e-31	-3.84789e-93	0	0
2017.8	0.000267424	0.000266222	3.52635e-07	0.00026587	-3.77161e-34	-8.25154e-38	1.99257e-32	-3.86273e-95	0	0
2018.44	0.000208859	0.000227511	4.48439e-07	0.000227062	-4.00519e-35	-9.87203e-39	1.94488e-33	-3.68312e-97	0	0
2019.08	0.000158749	0.000191521	5.63199e-07	0.000190957	-4.10366e-36	-1.14813e-39	1.82256e-34	-3.33571e-99	0	0
2019.73	0.000120289	0.000158839	6.98555e-07	0.00015814	-4.05669e-37	-1.29806e-40	1.63975e-35	-2.86953e-101	0	0
2020.37	9.11271e-05	0.000129818	8.55694e-07	0.000128962	-3.86921e-38	-1.42662e-41	1.4164e-36	-2.34468e-103	0	0
2021.01	6.82488e-05	0.000104597	1.03518e-06	0.000103562	-3.56061e-39	-1.5242e-42	1.17463e-37	-1.81973e-105	0	0
2021.65	4.98276e-05	8.31304e-05	1.23678e-06	8.18936e-05	-3.1614e-40	-1.58365e-43	9.35242e-39	-1.34147e-107	0	0
2022.3	3.41602e-05	6.52292e-05	1.45932e-06	6.37699e-05	-2.70822e-41	-1.66955e-44	7.1492e-40	-9.39298e-110	0	0
2022.94	1.94726e-05	5.05991e-05	1.70055e-06	4.88986e-05	-2.23842e-42	-9.29189e-45	5.24687e-41	-6.24709e-112	0	0
2023.58	5.27255e-06	3.88796e-05	1.95707e-06	3.69225e-05	-1.78504e-43	-8.1344e-44	3.69702e-42	-3.94641e-114	0	0
2024.23	-6.80882e-06	2.96781e-05	2.22435e-06	2.74538e-05	-1.37343e-44	-8.28566e-43	2.501e-43	-2.36797e-116	0	0
2024.87	-1.43541e-05	2.25982e-05	2.49678e-06	2.01014e-05	-1.01957e-45	-8.20698e-42	1.62436e-44	-1.34959e-118	0	0
2025.51	-1.75088e-05	1.72611e-05	2.76782e-06	1.44933e-05	-7.30265e-47	-7.89071e-41	1.01289e-45	-7.30597e-121	0	0
2026.15	-1.75881e-05	1.33204e-05	3.03022e-06	1.02902e-05	-5.04655e-48	-7.36408e-40	6.06388e-47	-3.75668e-123	0	0
2026.8	-1.58324e-05	1.04707e-05	3.27635e-06	7.19436e-06	-3.3648e-49	-6.67099e-39	3.48536e-48	-1.83476e-125	0	0
2027.44	-1.32697e-05	8.45164e-06	3.49854e-06	4.9531e-06	-2.16459e-50	-5.86586e-38	1.92361e-49	-8.51151e-128	0	0
2028.08	-1.20604e-05	7.04743e-06	3.68946e-06	3.35797e-06	-1.34352e-51	-5.00659e-37	1.07604e-50	-3.75045e-130	0	0
2028.72	-1.49345e-05	6.08432e-06	3.84254e-06	2.24178e-06	-8.04566e-53	-4.14784e-36	1.1642e-50	-1.56968e-132	0	0
2029.37	-2.02933e-05	5.42609e-06	3.95234e-06	1.47375e-06	-4.64871e-54	-3.33558e-35	2.08273e-49	-6.24006e-135	0	0
2030.01	-2.33527e-05	4.96892e-06	4.01485e-06	9.54069e-07	-2.59152e-55	-2.6037e-34	3.74301e-48	-2.35622e-137	0	0
2030.65	-1.92839e-05	4.63602e-06	4.02777e-06	6.08252e-07	-1.39388e-56	-1.97278e-33	6.45907e-47	-8.45074e-140	0	0
2031.3	-9.88501e-06	4.3726e-06	3.99062e-06	3.8198e-07	-7.23355e-58	-1.4509e-32	1.07011e-45	-2.87888e-142	0	0
2031.94	-3.53677e-06	4.14128e-06	3.90477e-06	2.36518e-07	-3.62182e-59	-1.03577e-31	1.70215e-44	-9.31542e-145	0	0
2032.58	-6.01941e-06	3.91831e-06	3.77337e-06	1.44934e-07	-1.74966e-60	-7.17728e-31	2.5994e-43	-2.86307e-147	0	0
2033.22	-1.45933e-05	3.69032e-06	3.60118e-06	8.91396e-08	-8.15517e-62	-4.82754e-30	3.81118e-42	-8.35818e-150	0	0
2033.87	-2.09754e-05	3.45199e-06	3.39421e-06	5.77807e-08	-3.66744e-63	-3.15182e-29	5.36482e-41	-2.31762e-152	0	0
2034.51	-2.08462e-05	3.20449e-06	3.15946e-06	4.50261e-08	-1.59127e-64	-1.9974e-28	7.25035e-40	-6.10411e-155	0	0
2035.15	-1.61335e-05	2.95486e-06	2.90447e-06	5.03862e-08	-6.66157e-66	-1.22868e-27	9.40747e-39	-1.52705e-157	0	0
2035.8	-9.55441e-06	2.71678e-06	2.63695e-06	7.98351e-08	-2.69067e-67	-7.3364e-27	1.17191e-37	-3.62856e-160	0	0
2036.44	-1.43084e-06	2.51308e-06	2.36437e-06	1.48711e-07	-1.04857e-68	-4.25203e-26	1.40161e-36	-8.18966e-163	0	0
2037.08	8.88048e-06	2.38078e-06	2.09367e-06	2.87107e-07	-3.9426e-70	-2.3921e-25	1.60941e-35	-1.75569e-165	0	0
2037.72	2.10506e-05	2.37966e-06	1.83098e-06	5.48684e-07	-1.43028e-71	-1.30626e-24	1.77426e-34	-3.57503e-168	0	0
2038.37	3.47136e-05	2.60535e-06	1.58138e-06	1.02397e-06	-5.00623e-73	-6.92392e-24	1.87792e-33	-6.91453e-171	0	0
2039.01	4.94775e-05	3.20794e-06	1.34887e-06	1.85908e-06	-1.69064e-74	-3.5624e-23	1.90829e-32	-1.27027e-173	0	0
2039.65	6.46039e-05	4.41641e-06	1.13627e-06	3.28014e-06	-5.50864e-76	-1.77911e-22	1.86175e-31	-2.21656e-176	0	0
2040.3	7.93773e-05	6.56803e-06	9.45311e-07	5.62272e-06	-1.73176e-77	-8.62446e-22	1.74385e-30	-3.67377e-179	0	0
2040.94	9.47694e-05	1.01399e-05	7.76689e-07	9.3632e-06	-5.2527e-79	-4.05818e-21	1.56821e-29	-5.78358e-182	0	0
2041.58	0.00011303	1.57768e-05	6.30231e-07	1.51466e-05	-1.5372e-80	-1.85353e-20	1.35397e-28	-8.6483e-185	0	0
2042.22	0.000132669	2.43072e-05	5.05047e-07	2.38021e-05	-4.34037e-82	-8.21745e-20	1.12233e-27	-1.22833e-187	0	0
2042.87	0.000147447	3.67347e-05	3.99709e-07	3.6335e-05	-1.18243e-83	-3.53626e-19	8.93193e-27	-1.65711e-190	0	0
2043.51	0.000152796	5.41944e-05	3.12418e-07	5.3882e-05	-3.10797e-85	-1.47714e-18	6.8246e-26	-2.12342e-193	0	0
2044.15	0.000153348	7.78606e-05	2.41162e-07	7.76194e-05	-7.88186e-87	-5.98917e-18	5.00632e-25	-2.58447e-196	0	0
2044.8	0.000160613	0.000108803	1.83848e-07	0.000108619	-1.92855e-88	-2.35712e-17	3.52589e-24	-2.98784e-199	0	0
2045.44	0.000182125	0.000147794	1.38418e-07	0.000147656	-4.55288e-90	-9.00465e-17	2.38412e-23	-3.28091e-202	0	0
2046.08	0.000216037	0.000195089	1.02922e-07	0.000194986	-1.03703e-91	-3.33904e-16	1.54773e-22	-3.42201e-205	0	0
2046.72	0.000256921	0.000250205	7.55812e-08	0.00025013	-2.27903e-93	-1.20183e-15	9.64659e-22	-3.39014e-208	0	0
2047.37	0.000301828	0.000311754	5.48214e-08	0.000311699	-4.83235e-95	-4.19892e-15	5.77246e-21	-3.19011e-211	0	0
2048.01	0.000350847	0.000377364	3.92885e-08	0.000377324	-9.88596e-97	-1.42397e-14	3.31632e-20	-2.8513e-214	0	0
2048.65	0.000403329	0.000443741	2.78566e-08	0.000443713	-1.95133e-98	-4.6874e-14	1.8292e-19	-2.42065e-217	0	0
2049.29	0.000457809	0.000506892	1.96342e-08	0.000506873	-3.71615e-100	-1.49773e-13	9.68669e-19	-1.95196e-220	0	0
2049.94	0.000512717	0.00056249	1.39842e-08	0.000562476	-6.82822e-102	-4.6452e-13	4.92491e-18	-1.49506e-223	0	0
2050.58	0.000564529	0.000606353	1.05799e-08	0.000606342	-1.21052e-103	-1.39844e-12	2.40398e-17	-1.08767e-226	0	0
2051.22	0.000606462	0.00063496	9.52504e-09	0.000634951	-2.07057e-105	-4.08652e-12	1.12661e-16	-7.51602e-230	0	0
2051.87	0.000630016	0.00064592	1.1578e-08	0.000645909	-3.41711e-107	-1.15913e-11	5.06901e-16	-4.93319e-233	0	0
2052.51	0.000631337	0.000638298	1.85162e-08	0.000638279	-5.441e-109	-3.1914e-11	2.18969e-15	-3.07552e-236	0	0
2053.15	0.000613778	0.000612749	3.36582e-08	0.000612716	-8.35891e-111	-8.52903e-11	9.08137e-15	-1.8212e-239	0	0
2053.79	0.000583874	0.000571431	6.25083e-08	0.000571368	-1.239e-112	-2.21252e-10	3.61601e-14	-1.02435e-242	0	0
2054.44	0.000544248	0.000517698	1.13391e-07	0.000517585	-1.77193e-114	-5.57113e-10	1.38234e-13	-5.47257e-246	0	0
2055.08	0.000493292	0.000455663	1.97816e-07	0.000455466	-2.44496e-116	-1.36166e-09	5.07355e-13	-2.77704e-249	0	0
2055.72	0.00043124	0.000389676	3.30184e-07	0.000389349	-3.25498e-118	-3.23046e-09	1.78779e-12	-1.33852e-252	0	0
2056.37	0.000365008	0.000323838	5.26412e-07	0.000323319	-4.18096e-120	-7.43926e-09	6.04828e-12	-6.12798e-256	0	0
2057.01	0.000302902	0.000261599	8.01162e-07	0.000260814	-5.1815e-122	-1.66289e-08	1.96452e-11	-2.66477e-259	0	0
2057.65	0.000248567	0.000205509	1.16373e-06	0.000204381	-6.19564e-124	-3.60801e-08	6.12616e-11	-1.10066e-262	0	0
2058.29	0.000200374	0.000157119	1.61321e-06	0.000155582	-7.14773e-126	-7.59873e-08	1.83413e-10	-4.31814e-266	0	0
2058.94	0.000155819	0.000117029	2.13415e-06	0.000115049	-7.95613e-128	-1.5534e-07	5.27207e-10	-1.60913e-269	0	0
2059.58	0.000115759	8.50331e-05	2.69431e-06	8.26455e-05	-8.5445e-130	-3.08245e-07	1.45493e-09	-5.69555e-273	0	0
2060.22	8.31098e-05	6.0328e-05	3.24608e-06	5.76718e-05	-8.85366e-132	-5.93714e-07	3.85488e-09	-1.91484e-276	0	0
2060.87	5.88383e-05	4.17264e-05	3.73214e-06	3.90945e-05	-8.85137e-134	-1.11001e-06	9.80594e-09	-6.11491e-280	0	0
2061.51	3.85845e-05	2.78485e-05	4.09492e-06	2.5744e-05	-8.53787e-136	-2.01441e-06	2.39484e-08	-1.85493e-283	0	0
2062.15	1.53171e-05	1.72636e-05	4.28765e-06	1.64682e-05	-7.94584e-138	-3.54844e-06	5.61533e-08	-5.34603e-287	0	0
2062.79	-1.2978e-05	8.5769e-06	4.2843e-06	1.02335e-05	-7.1348e-140	-6.06732e-06	1.2641e-07	-1.46494e-290	0	0
2063.44	-3.94265e-05	4.66121e-07	4.08534e-06	6.17748e-06	-6.18123e-142	-1.00699e-05	2.73213e-07	-3.82748e-294	0	0
2064.08	-5.56684e-05	-8.31571e-06	3.71761e-06	3.62249e-06	-5.16677e-144	-1.62227e-05	5.6693e-07	-9.63845e-298	0	0
2064.72	-6.16589e-05	-1.8947e-05	3.22839e-06	2.06353e-06	-4.16692e-146	-2.53684e-05	1.12946e-06	-2.43449e-301	0	0
2065.37	-6.63131e-05	-3.25285e-05	2.67545e-06	1.14189e-06	-3.24237e-148	-3.85062e-05	2.16036e-06	-6.97297e-305	0	0
2066.01	-7.92769e-05	-5.00365e-05	2.11589e-06	6.13827e-07	-2.43423e-150	-5.67335e-05	3.96733e-06	--	0	0
2066.65	-0.000101789	-7.22249e-05	1.5969e-06	3.20536e-07	-1.76324e-152	-8.11374e-05	6.99507e-06	--	0	0
2067.29	-0.000128706	-9.94816e-05	1.15013e-06	1.62598e-07	-1.23229e-154	-0.000112636	1.18417e-05	--	0	0
2067.94	-0.000156847	-0.000131661	7.90508e-07	8.01241e-08	-8.30931e-157	-0.000151779	1.92475e-05	--	0	0
2068.58	-0.000189214	-0.000167937	5.18503e-07	3.83548e-08	-5.40591e-159	-0.000198533	3.00395e-05	--	0	0
2069.22	-0.000230058	-0.000206729	3.24552e-07	1.78355e-08	-3.39332e-161	-0.00025209	4.50189e-05	--	0	0
2069.86	-0.000277798	-0.000245749	1.93867e-07	8.05672e-09	-2.05509e-163	-0.000310743	6.47926e-05	0	0	0
2070.51	-0.000326022	-0.000282207	1.10512e-07	3.53542e-09	-1.20085e-165	-0.000371889	8.95679e-05	0	0	0
2071.15	-0.000366608	-0.000313161	6.0118e-08	1.50706e-09	-6.77016e-168	-0.000432178	0.000118955	0	0	0
2071.79	-0.000392358	-0.000335955	3.12094e-08	6.24067e-10	-3.68265e-170	-0.000487828	0.000151841	0	0	0
2072.44	-0.000397916	-0.000348677	1.54616e-08	2.51038e-10	-1.93274e-172	-0.000535088	0.000186395	0	0	0
2073.08	-0.000383446	-0.000350503	7.30986e-09	9.80972e-11	-9.7867e-175	-0.000570767	0.000220257	0	0	0
2073.72	-0.000353833	-0.000341861	3.29801e-09	3.72377e-11	-4.78136e-177	-0.00059277	0.000250905	0	0	0
2074.36	-0.000314488	-0.000324354	1.41998e-09	1.37315e-11	-2.25381e-179	-0.000600499	0.000276144	0	0	0
2075.01	-0.000269534	-0.000300459	5.83443e-10	4.9188e-12	-1.02503e-181	-0.000595062	0.000294603	0	0	0
2075.65	-0.00022398	-0.00027308	2.28772e-10	1.71164e-12	-4.49785e-184	-0.000579181	0.000306101	0	0	0
2076.29	-0.00018347	-0.000245055	8.56038e-11	5.78591e-13	-1.90426e-186	-0.000556807	0.000311752	0	0	0
2076.94	-0.000152231	-0.000218728	3.05683e-11	1.89994e-13	-7.77853e-189	-0.000532468	0.00031374	0	0	0
2077.58	-0.000133411	-0.000195665	1.04169e-11	6.06064e-14	-3.06564e-191	-0.000510462	0.000314797	0	0	0
2078.22	-0.000131961	-0.000176553	3.38758e-12	1.87804e-14	-1.16572e-193	-0.000494038	0.000317485	0	0	0
2078.86	-0.000150842	-0.000161264	1.05131e-12	5.65327e-15	-4.27683e-196	-0.00048475	0.000323486	0	0	0
2079.51	-0.000184278	-0.000149055	3.11355e-13	1.65312e-15	-1.51391e-198	-0.000482136	0.000333081	0	0	0
2080.15	-0.000217582	-0.000138825	8.79973e-14	4.69586e-16	-5.17044e-201	-0.000483809	0.000344984	0	0	0
2080.79	-0.000236831	-0.000129394	2.3734e-14	1.2958e-16	-1.70376e-203	-0.000485982	0.000356589	0	0	0
2081.44	-0.000235222	-0.000119743	6.10884e-15	3.47349e-17	-5.41676e-206	-0.000484302	0.000364559	0	0	0
2082.08	-0.000212523	-0.00010919	1.50049e-15	9.04491e-18	-1.66158e-208	-0.000474813	0.000365623	0	0	0
2082.72	-0.000172454	-9.74642e-05	3.5172e-16	2.28798e-18	-4.91764e-211	-0.000454814	0.00035735	0	0	0
2083.36	-0.000123426	-8.47085e-05	7.86767e-17	5.62221e-19	-1.40424e-213	-0.000423412	0.000338703	0	0	0
2084.01	-7.59386e-05	-7.13855e-05	1.67951e-17	1.34206e-19	-3.86883e-216	-0.000381644	0.000310258	0	0	0
2084.65	-3.7521e-05	-5.8141e-05	3.42142e-18	3.11203e-20	-1.02841e-218	-0.000332171	0.00027403	0	0	0
2085.29	-1.18163e-05	-4.56504e-05	6.65147e-19	7.01013e-21	-2.63759e-221	-0.000278663	0.000233013	0	0	0
2085.94	-2.3358e-06	-3.44841e-05	1.234e-19	1.53397e-21	-6.52678e-224	-0.000225046	0.000190562	0	0	0
2086.58	-1.02318e-05	-2.50197e-05	2.18475e-20	3.26073e-22	-1.55827e-226	-0.000174813	0.000149793	0	0	0
2087.22	-2.74355e-05	-1.74104e-05	3.69125e-21	6.73322e-23	-3.58951e-229	-0.000130537	0.000113127	0	0	0
2087.86	-3.77899e-05	-1.16046e-05	5.9516e-22	1.35064e-23	-7.97776e-232	-9.36674e-05	8.20627e-05	0	0	0
2088.51	-3.07066e-05	-7.39928e-06	9.1576e-23	2.63187e-24	-1.71071e-234	-6.45683e-05	5.7169e-05	0	0	0
2089.15	-8.60158e-06	-4.50719e-06	1.34467e-23	4.98193e-25	-3.53937e-237	-4.27512e-05	3.8244e-05	0	0	0
2089.79	1.98921e-05	-2.61897e-06	1.88427e-24	9.16094e-26	-7.06521e-240	-2.71845e-05	2.45655e-05	0	0	0
2090.43	4.82016e-05	-1.44909e-06	2.51978e-25	1.63641e-26	-1.36074e-242	-1.65997e-05	1.51506e-05	0	0	0
2091.08	7.2731e-05	-7.61788e-07	3.21577e-26	2.83956e-27	-2.52859e-245	-9.73322e-06	8.97144e-06	0	0	0
2091.72	8.80067e-05	-3.79372e-07	3.91685e-27	4.78651e-28	-4.53348e-248	-5.47992e-06	5.10054e-06	0	0	0
2092.36	8.96205e-05	-1.78236e-07	4.55401e-28	7.83783e-29	-7.84217e-251	-2.96236e-06	2.78412e-06	0	0	0
2093.01	7.981e-05	-7.85179e-08	5.05667e-29	1.24676e-29	-1.30886e-253	-1.53758e-06	1.45906e-06	0	0	0
2093.65	6.58637e-05	-3.21173e-08	5.36993e-30	1.92653e-30	-2.10766e-256	-7.66246e-07	7.34129e-07	0	0	0
2094.29	5.36581e-05	-1.19911e-08	5.47729e-31	2.89187e-31	-3.27461e-259	-3.66626e-07	3.54635e-07	0	0	0
2094.93	4.38794e-05	-3.94674e-09	5.43634e-32	4.21687e-32	-4.90874e-262	-1.68422e-07	1.64476e-07	0	0	0
2095.58	3.41248e-05	-1.0467e-09	5.45445e-33	5.97325e-33	-7.09956e-265	-7.42838e-08	7.32371e-08	0	0	0
2096.22	2.20281e-05	-1.47006e-10	6.08358e-34	8.21938e-34	-9.90706e-268	-3.14561e-08	3.13091e-08	0	0	0
2096.86	5.57929e-06	6.1663e-11	8.74555e-35	1.09869e-34	-1.33386e-270	-1.27888e-08	1.28505e-08	0	0	0
2097.51	-1.72476e-05	7.18708e-11	1.71353e-35	1.42667e-35	-1.73271e-273	-4.99194e-09	5.06381e-09	0	0	0
2098.15	-4.80106e-05	4.50039e-11	4.08999e-36	1.79961e-36	-2.17166e-276	-1.87077e-09	1.91578e-09	0	0	0
2098.79	-8.68126e-05	2.27515e-11	1.0512e-36	2.20517e-37	-2.6261e-279	-6.73108e-10	6.9586e-10	0	0	0
2099.43	-0.000131862	1.01453e-11	2.74373e-37	2.62491e-38	-3.06395e-282	-2.3252e-10	2.42665e-10	0	0	0

## Sheet: Fig.3A bottom spectrum
X	data	fit	Hred	Hred*	HoxH	Hox	Hhyd	Hred'	Hsred	Hsred*
1715.03	-2.12881e-05	6.6978e-94	0	1.40895e-288	-1.0675e-140	-2.5917e-116	0	6.6978e-94	0	0
1715.67	-2.94803e-05	3.12304e-92	0	2.70427e-286	-1.61181e-138	-2.43431e-114	0	3.12304e-92	0	0
1716.32	-3.90293e-05	1.40312e-90	0	5.08177e-284	-2.33651e-136	-2.19521e-112	0	1.40312e-90	0	0
1716.96	-4.47378e-05	6.07416e-89	0	9.34953e-282	-3.25186e-134	-1.90057e-110	0	6.07416e-89	0	0
1717.6	-3.97212e-05	2.53366e-87	0	1.68412e-279	-4.34514e-132	-1.5798e-108	--	2.53366e-87	0	0
1718.24	-2.09873e-05	1.01832e-85	0	2.97008e-277	-5.57423e-130	-1.26075e-106	--	1.01832e-85	0	0
1718.89	5.42256e-06	3.94358e-84	0	5.12826e-275	-6.86555e-128	-9.65976e-105	--	3.94358e-84	0	0
1719.53	2.65796e-05	1.47153e-82	0	8.66928e-273	-8.11848e-126	-7.10578e-103	--	1.47153e-82	0	0
1720.17	3.53482e-05	5.2908e-81	0	1.43484e-270	-9.21686e-124	-5.01841e-101	--	5.2908e-81	0	0
1720.82	3.64141e-05	1.83293e-79	0	2.32507e-268	-1.00462e-121	-3.40275e-99	2.15477e-307	1.83293e-79	0	0
1721.46	3.74996e-05	6.11844e-78	0	3.68873e-266	-1.0513e-119	-2.21515e-97	2.47709e-304	6.11844e-78	0	0
1722.1	3.7667e-05	1.96793e-76	0	5.72964e-264	-1.05624e-117	-1.38447e-95	2.74746e-301	1.96793e-76	0	0
1722.74	3.08271e-05	6.09887e-75	0	8.71339e-262	-1.01885e-115	-8.30759e-94	2.94018e-298	6.09887e-75	0	0
1723.39	1.7184e-05	1.82122e-73	0	1.29735e-259	-9.43545e-114	-4.78603e-92	3.03576e-295	1.82122e-73	0	0
1724.03	5.78329e-06	5.24019e-72	0	1.89119e-257	-8.38931e-112	-2.64719e-90	3.02421e-292	5.24019e-72	0	0
1724.67	5.95832e-06	1.45279e-70	0	2.69913e-255	-7.16141e-110	-1.40573e-88	2.90675e-289	1.45279e-70	0	0
1725.32	1.94183e-05	3.88091e-69	0	3.77156e-253	-5.86922e-108	-7.16689e-87	2.6956e-286	3.88091e-69	0	0
1725.96	4.04793e-05	9.98929e-68	0	5.15975e-251	-4.61818e-106	-3.50806e-85	2.41187e-283	9.98929e-68	0	0
1726.6	5.80607e-05	2.47747e-66	0	6.91107e-249	-3.48875e-104	-1.64859e-83	2.08211e-280	2.47747e-66	0	0
1727.24	6.23094e-05	5.92045e-65	0	9.06298e-247	-2.53034e-102	-7.4382e-82	1.73423e-277	5.92045e-65	0	0
1727.89	5.13048e-05	1.36324e-63	0	1.16361e-244	-1.76197e-100	-3.22204e-80	1.39367e-274	1.36324e-63	--	--
1728.53	3.45539e-05	3.02457e-62	0	1.46269e-242	-1.17794e-98	-1.34e-78	1.0806e-271	3.02457e-62	--	--
1729.17	2.42065e-05	6.46586e-61	0	1.80014e-240	-7.56068e-97	-5.35041e-77	8.08386e-269	6.46586e-61	--	--
1729.82	2.41555e-05	1.33187e-59	0	2.16905e-238	-4.65914e-95	-2.05106e-75	5.8348e-266	1.33187e-59	--	--
1730.46	2.7347e-05	2.64343e-58	0	2.55885e-236	-2.75652e-93	-7.54881e-74	4.06335e-263	2.64343e-58	--	--
1731.1	2.25533e-05	5.05531e-57	0	2.95547e-234	-1.56576e-91	-2.6674e-72	2.7302e-260	5.05531e-57	--	--
1731.74	1.76354e-06	9.31535e-56	0	3.3421e-232	-8.5388e-90	-9.04913e-71	1.76993e-257	9.31535e-56	1.89582e-306	1.89582e-306
1732.39	-3.46899e-05	1.65395e-54	0	3.70017e-230	-4.47073e-88	-2.94737e-69	1.10705e-254	1.65395e-54	1.51201e-303	1.51201e-303
1733.03	-7.5561e-05	2.82956e-53	0	4.01082e-228	-2.24734e-86	-9.21661e-68	6.68085e-252	2.82956e-53	1.16748e-300	1.16748e-300
1733.67	-0.000103607	4.66431e-52	0	4.25651e-226	-1.0846e-84	-2.76705e-66	3.88998e-249	4.66431e-52	8.72741e-298	8.72741e-298
1734.32	-0.000106983	7.40846e-51	0	4.42267e-224	-5.0255e-83	-7.97577e-65	2.18532e-246	7.40846e-51	6.31623e-295	6.31623e-295
1734.96	-8.89731e-05	1.13381e-49	0	4.49908e-222	-2.23562e-81	-2.20717e-63	1.18449e-243	1.13381e-49	4.42557e-292	4.42557e-292
1735.6	-6.22547e-05	1.67196e-48	0	4.48098e-220	-9.54827e-80	-5.86422e-62	6.19443e-241	1.67196e-48	3.00205e-289	3.00205e-289
1736.24	-3.68667e-05	2.37565e-47	0	4.3695e-218	-3.91526e-78	-1.49587e-60	3.12552e-238	2.37565e-47	1.97154e-286	1.97154e-286
1736.89	-1.77683e-05	3.25246e-46	0	4.17158e-216	-1.54137e-76	-3.6634e-59	1.52158e-235	3.25246e-46	1.25352e-283	1.25352e-283
1737.53	-7.8038e-06	4.29056e-45	0	3.89922e-214	-5.82588e-75	-8.6136e-58	7.14691e-233	4.29056e-45	7.71608e-281	7.71608e-281
1738.17	-6.16767e-06	5.45366e-44	0	3.56833e-212	-2.1141e-73	-1.94444e-56	3.23887e-230	5.45366e-44	4.59832e-278	4.59832e-278
1738.82	-6.75809e-06	6.67934e-43	0	3.19714e-210	-7.36544e-72	-4.21419e-55	1.41618e-227	6.67934e-43	2.65302e-275	2.65302e-275
1739.46	-2.72159e-06	7.88229e-42	0	2.80458e-208	-2.46366e-70	-8.76883e-54	5.97444e-225	7.88229e-42	1.4819e-272	1.4819e-272
1740.1	5.10538e-06	8.96278e-41	0	2.40871e-206	-7.91174e-69	-1.75178e-52	2.43179e-222	8.96278e-41	8.01378e-270	8.01378e-270
1740.74	1.13407e-05	9.81987e-40	0	2.02539e-204	-2.43934e-67	-3.35989e-51	9.55007e-220	9.81987e-40	4.19559e-267	4.19559e-267
1741.39	1.41256e-05	1.03667e-38	0	1.66742e-202	-7.22074e-66	-6.18701e-50	3.61858e-217	1.03667e-38	2.12661e-264	2.12661e-264
1742.03	1.62869e-05	1.0545e-37	0	1.34396e-200	-2.05211e-64	-1.09382e-48	1.32288e-214	1.0545e-37	1.04357e-261	1.04357e-261
1742.67	1.72683e-05	1.03354e-36	0	1.06057e-198	-5.59923e-63	-1.8566e-47	4.66612e-212	1.03354e-36	4.95782e-259	4.95782e-259
1743.31	1.30482e-05	9.76066e-36	0	8.19416e-197	-1.46678e-61	-3.02553e-46	1.58797e-209	9.76066e-36	2.28034e-256	2.28034e-256
1743.96	2.25668e-06	8.88184e-35	0	6.19836e-195	-3.68902e-60	-4.73362e-45	5.2141e-207	8.88184e-35	1.01542e-253	1.01542e-253
1744.6	-1.06502e-05	7.78752e-34	0	4.59049e-193	-8.90771e-59	-7.11041e-44	1.65184e-204	7.78752e-34	4.37757e-251	4.37757e-251
1745.24	-1.98684e-05	6.57912e-33	0	3.32851e-191	-2.06505e-57	-1.02543e-42	5.04903e-202	6.57912e-33	1.82708e-248	1.82708e-248
1745.89	-2.31784e-05	5.3556e-32	0	2.36293e-189	-4.59625e-56	-1.41979e-41	1.48902e-199	5.3556e-32	7.38279e-246	7.38279e-246
1746.53	-2.17658e-05	4.2007e-31	0	1.64233e-187	-9.82168e-55	-1.88735e-40	4.23684e-197	4.2007e-31	2.88816e-243	2.88816e-243
1747.17	-1.745e-05	3.17473e-30	0	1.11759e-185	-2.01501e-53	-2.40874e-39	1.16315e-194	3.17473e-30	1.09386e-240	1.09386e-240
1747.81	-1.25501e-05	2.31187e-29	0	7.44579e-184	-3.96897e-52	-2.95146e-38	3.08093e-192	2.31187e-29	4.01086e-238	4.01086e-238
1748.46	-8.95353e-06	1.62216e-28	0	4.8568e-182	-7.50564e-51	-3.4721e-37	7.8737e-190	1.62216e-28	1.42381e-235	1.42381e-235
1749.1	-8.52552e-06	1.09672e-27	0	3.10169e-180	-1.36272e-49	-3.92154e-36	1.94145e-187	1.09672e-27	4.89336e-233	4.89336e-233
1749.74	-1.14554e-05	7.14446e-27	0	1.93935e-178	-2.37539e-48	-4.25237e-35	4.61878e-185	7.14446e-27	1.62817e-230	1.62817e-230
1750.39	-1.42596e-05	4.48452e-26	0	1.1872e-176	-3.97532e-47	-4.42704e-34	1.06018e-182	4.48452e-26	5.24482e-228	5.24482e-228
1751.03	-1.14433e-05	2.71228e-25	0	7.11541e-175	-6.38731e-46	-4.42493e-33	2.3479e-180	2.71228e-25	1.63568e-225	1.63568e-225
1751.67	-1.93747e-06	1.58061e-24	0	4.17529e-173	-9.85311e-45	-4.24627e-32	5.01688e-178	1.58061e-24	4.93864e-223	4.93864e-223
1752.31	9.64189e-06	8.8754e-24	0	2.39873e-171	-1.45928e-43	-3.91217e-31	1.03428e-175	8.8754e-24	1.44362e-220	1.44362e-220
1752.96	1.77025e-05	4.80201e-23	0	1.34923e-169	-2.07497e-42	-3.46049e-30	2.05729e-173	4.80201e-23	4.08542e-218	4.08542e-218
1753.6	2.02579e-05	2.5034e-22	0	7.43022e-168	-2.83266e-41	-2.93877e-29	3.94824e-171	2.5034e-22	1.11933e-215	1.11933e-215
1754.24	1.78996e-05	1.25751e-21	0	4.00614e-166	-3.71267e-40	-2.39609e-28	7.31077e-169	1.25751e-21	2.96906e-213	2.96906e-213
1754.89	1.22245e-05	6.08642e-21	0	2.11475e-164	-4.67183e-39	-1.87565e-27	1.30609e-166	6.08642e-21	7.62463e-211	7.62463e-211
1755.53	7.90671e-06	2.83848e-20	0	1.09296e-162	-5.64413e-38	-1.40964e-26	2.25131e-164	2.83848e-20	1.89564e-208	1.89564e-208
1756.17	1.04843e-05	1.2755e-19	0	5.53038e-161	-6.54661e-37	-1.01712e-25	3.74411e-162	1.27551e-19	4.5628e-206	4.5628e-206
1756.81	2.07568e-05	5.52269e-19	0	2.73979e-159	-7.29029e-36	-7.04606e-25	6.00778e-160	5.52269e-19	1.06327e-203	1.06327e-203
1757.46	3.24604e-05	2.30404e-18	0	1.32889e-157	-7.79439e-35	-4.68629e-24	9.301e-158	2.30405e-18	2.39882e-201	2.39882e-201
1758.1	3.96443e-05	9.26197e-18	0	6.31058e-156	-8.00071e-34	-2.99242e-23	1.3893e-155	9.262e-18	5.23948e-199	5.23948e-199
1758.74	4.10143e-05	3.58747e-17	0	2.934e-154	-7.88469e-33	-1.83453e-22	2.00224e-153	3.58748e-17	1.10794e-196	1.10794e-196
1759.39	3.63711e-05	1.33889e-16	0	1.33555e-152	-7.46018e-32	-1.07978e-21	2.78411e-151	1.3389e-16	2.26821e-194	2.26821e-194
1760.03	2.45175e-05	4.81473e-16	0	5.95209e-151	-6.77678e-31	-6.10175e-21	3.73515e-149	4.81479e-16	4.49562e-192	4.49562e-192
1760.67	7.14659e-06	1.66829e-15	0	2.5971e-149	-5.91025e-30	-3.31042e-20	4.83483e-147	1.66832e-15	8.62648e-190	8.62648e-190
1761.31	-8.95938e-06	5.5698e-15	0	1.10947e-147	-4.94878e-29	-1.72433e-19	6.03817e-145	5.56997e-15	1.60256e-187	1.60256e-187
1761.96	-1.77261e-05	1.79176e-14	0	4.64039e-146	-3.97832e-28	-8.6232e-19	7.27581e-143	1.79184e-14	2.88228e-185	2.88228e-185
1762.6	-1.9293e-05	5.55374e-14	0	1.90021e-144	-3.07051e-27	-4.14023e-18	8.45879e-141	5.55416e-14	5.01874e-183	5.01874e-183
1763.24	-1.88137e-05	1.65867e-13	0	7.61831e-143	-2.27525e-26	-1.90849e-17	9.48827e-139	1.65886e-13	8.46042e-181	8.46042e-181
1763.88	-1.7843e-05	4.77304e-13	0	2.99037e-141	-1.61867e-25	-8.44627e-17	1.02687e-136	4.77389e-13	1.38079e-178	1.38079e-178
1764.53	-1.37114e-05	1.3234e-12	0	1.14921e-139	-1.10559e-24	-3.58879e-16	1.07225e-134	1.32375e-12	2.18173e-176	2.18173e-176
1765.17	-4.09193e-06	3.53537e-12	0	4.324e-138	-7.25008e-24	-1.464e-15	1.08027e-132	3.53684e-12	3.33744e-174	3.33744e-174
1765.81	8.96907e-06	9.09958e-12	0	1.59287e-136	-4.56456e-23	-5.73381e-15	1.05006e-130	9.10531e-12	4.94269e-172	4.94269e-172
1766.46	1.96627e-05	2.25648e-11	0	5.74493e-135	-2.75908e-22	-2.15603e-14	9.84805e-129	2.25864e-11	7.08683e-170	7.08683e-170
1767.1	2.32605e-05	5.39069e-11	0	2.02861e-133	-1.60117e-21	-7.78349e-14	8.91121e-127	5.39848e-11	9.83737e-168	9.83737e-168
1767.74	1.88713e-05	1.24058e-10	0	7.01328e-132	-8.92116e-21	-2.69776e-13	7.77992e-125	1.24328e-10	1.32204e-165	1.32204e-165
1768.38	8.77031e-06	2.74993e-10	0	2.37385e-130	-4.77215e-20	-8.97722e-13	6.55337e-123	2.7589e-10	1.72008e-163	1.72008e-163
1769.03	-4.1262e-06	5.8703e-10	0	7.86676e-129	-2.45084e-19	-2.86807e-12	5.32605e-121	5.89898e-10	2.16666e-161	2.16666e-161
1769.67	-1.81983e-05	1.20652e-09	0	2.55239e-127	-1.20844e-18	-8.79724e-12	4.17636e-119	1.21532e-09	2.64223e-159	2.64223e-159
1770.31	-3.16844e-05	2.38664e-09	0	8.1079e-126	-5.72066e-18	-2.59067e-11	3.15967e-117	2.41255e-09	3.11953e-157	3.11953e-157
1770.96	-4.16752e-05	4.54135e-09	0	2.52162e-124	-2.60001e-17	-7.32465e-11	2.30641e-115	4.61459e-09	3.56571e-155	3.56571e-155
1771.6	-4.47326e-05	8.30596e-09	0	7.67819e-123	-1.13452e-16	-1.98825e-10	1.62436e-113	8.50478e-09	3.94586e-153	3.94586e-153
1772.24	-3.82822e-05	1.45849e-08	0	2.28901e-121	-4.75291e-16	-5.1816e-10	1.10377e-111	1.51031e-08	4.22741e-151	4.22741e-151
1772.88	-2.22086e-05	2.45463e-08	0	6.68109e-120	-1.91168e-15	-1.29648e-09	7.23651e-110	2.58428e-08	4.38477e-149	4.38477e-149
1773.53	-1.06745e-06	3.94931e-08	0	1.90922e-118	-7.38213e-15	-3.11442e-09	4.57751e-108	4.26075e-08	4.40308e-147	4.40308e-147
1774.17	1.69424e-05	6.05041e-08	0	5.34163e-117	-2.73688e-14	-7.18287e-09	2.79371e-106	6.7687e-08	4.28061e-145	4.28061e-145
1774.81	2.64906e-05	8.77038e-08	0	1.46319e-115	-9.74181e-14	-1.59048e-08	1.64507e-104	1.03609e-07	4.02895e-143	4.02895e-143
1775.46	2.82151e-05	1.19001e-07	0	3.92408e-114	-3.32914e-13	-3.38116e-08	9.34629e-103	1.52813e-07	3.67128e-141	3.67128e-141
1776.1	2.63075e-05	1.48156e-07	--	1.03035e-112	-1.09228e-12	-6.90103e-08	5.12325e-101	2.17167e-07	3.23877e-139	3.23877e-139
1776.74	2.39692e-05	1.62141e-07	--	2.64874e-111	-3.44069e-12	-1.35229e-07	2.70958e-99	2.97374e-07	2.76619e-137	2.76619e-137
1777.38	2.29784e-05	1.37936e-07	--	6.66661e-110	-1.04056e-11	-2.54412e-07	1.38265e-97	3.92358e-07	2.2873e-135	2.2873e-135
1778.03	2.47035e-05	3.92508e-08	--	1.64278e-108	-3.02131e-11	-4.59528e-07	6.80725e-96	4.98809e-07	1.83105e-133	1.83105e-133
1778.67	2.78686e-05	-1.85946e-07	--	3.96336e-107	-8.42235e-11	-7.96886e-07	3.23358e-94	6.11025e-07	1.41912e-131	1.41912e-131
1779.31	2.90517e-05	-6.05778e-07	-1.60588e-305	9.36176e-106	-2.25414e-10	-1.32675e-06	1.48199e-92	7.21199e-07	1.06481e-129	1.06481e-129
1779.96	2.59116e-05	-1.30113e-06	-3.6052e-302	2.16501e-104	-5.79211e-10	-2.12076e-06	6.5533e-91	8.20208e-07	7.7351e-128	7.7351e-128
1780.6	1.98624e-05	-2.35727e-06	-7.75269e-299	4.902e-103	-1.4289e-09	-3.25465e-06	2.79593e-89	8.98805e-07	5.43999e-126	5.43999e-126
1781.24	1.27576e-05	-3.84976e-06	-1.59692e-295	1.08666e-101	-3.38437e-09	-4.7954e-06	1.15091e-87	9.49027e-07	3.70397e-124	3.70397e-124
1781.88	4.52159e-06	-5.82568e-06	-3.1508e-292	2.35845e-100	-7.69594e-09	-6.78351e-06	4.571e-86	9.65526e-07	2.44161e-122	2.44161e-122
1782.53	-4.19118e-06	-8.28314e-06	-5.95477e-289	5.0115e-99	-1.68018e-08	-9.21284e-06	1.75158e-84	9.46503e-07	1.5582e-120	1.5582e-120
1783.17	-1.15712e-05	-1.11539e-05	-1.07799e-285	1.0426e-97	-3.52174e-08	-1.20127e-05	6.47592e-83	8.9403e-07	9.62737e-119	9.62737e-119
1783.81	-1.62558e-05	-1.42955e-05	-1.86928e-282	2.12363e-96	-7.08709e-08	-1.50383e-05	2.31006e-81	8.13681e-07	5.75879e-117	5.75879e-117
1784.45	-1.87373e-05	-1.74978e-05	-3.10484e-279	4.23495e-95	-1.36927e-07	-1.80745e-05	7.95056e-80	7.13557e-07	3.33498e-115	3.33498e-115
1785.1	-1.75634e-05	-2.05075e-05	-4.93982e-276	8.2685e-94	-2.53991e-07	-2.08565e-05	2.64012e-78	6.02942e-07	1.86979e-113	1.86979e-113
1785.74	-1.22502e-05	-2.30675e-05	-7.52817e-273	1.58058e-92	-4.52331e-07	-2.3106e-05	8.45862e-77	4.90901e-07	1.01492e-111	1.01492e-111
1786.38	-6.65721e-06	-2.49647e-05	-1.09894e-269	2.9581e-91	-7.734e-07	-2.45764e-05	2.61473e-75	3.8511e-07	5.33344e-110	5.33344e-110
1787.03	-6.8194e-06	-2.60755e-05	-1.53662e-266	5.42027e-90	-1.26958e-06	-2.5097e-05	7.79843e-74	2.91104e-07	2.71345e-108	2.71345e-108
1787.67	-1.28633e-05	-2.63945e-05	-2.0581e-263	9.72383e-89	-2.00091e-06	-2.46056e-05	2.24408e-72	2.12024e-07	1.33652e-106	1.33652e-106
1788.31	-1.78895e-05	-2.60397e-05	-2.64042e-260	1.70791e-87	-3.02763e-06	-2.31609e-05	6.23045e-71	1.48796e-07	6.37334e-105	6.37334e-105
1788.95	-1.65256e-05	-2.52285e-05	-3.24479e-257	2.93697e-86	-4.39832e-06	-2.09308e-05	1.66899e-69	1.00617e-07	2.94237e-103	2.94237e-103
1789.6	-1.04624e-05	-2.42293e-05	-3.8195e-254	4.94476e-85	-6.13451e-06	-1.81604e-05	4.31358e-68	6.55578e-08	1.31512e-101	1.31512e-101
1790.24	-6.21833e-06	-2.33011e-05	-4.30659e-251	8.15079e-84	-8.21452e-06	-1.51277e-05	1.07566e-66	4.11575e-08	5.69077e-100	5.69077e-100
1790.88	-8.21834e-06	-2.26343e-05	-4.65123e-248	1.31542e-82	-1.05607e-05	-1.20985e-05	2.58798e-65	2.48969e-08	2.38405e-98	2.38405e-98
1791.53	-1.52097e-05	-2.23102e-05	-4.81181e-245	2.07844e-81	-1.30351e-05	-9.2896e-06	6.0076e-64	1.45116e-08	9.6694e-97	9.6694e-97
1792.17	-2.22889e-05	-2.2287e-05	-4.76822e-242	3.21529e-80	-1.5447e-05	-6.84814e-06	1.34552e-62	8.14997e-09	3.79683e-95	3.79683e-95
1792.81	-2.63328e-05	-2.24169e-05	-4.52596e-239	4.86983e-79	-1.75745e-05	-4.84683e-06	2.90759e-61	4.41031e-09	1.44338e-93	1.44338e-93
1793.45	-2.92698e-05	-2.24881e-05	-4.11502e-236	7.2213e-78	-1.91969e-05	-3.29345e-06	6.06214e-60	2.29961e-09	5.31225e-92	5.31225e-92
1794.1	-3.48014e-05	-2.22795e-05	-3.58378e-233	1.0484e-76	-2.01321e-05	-2.14859e-06	1.21947e-58	1.15535e-09	1.89284e-90	1.89284e-90
1794.74	-4.30899e-05	-2.16153e-05	-2.98962e-230	1.49021e-75	-2.02701e-05	-1.34576e-06	2.36682e-57	5.59298e-10	6.52965e-89	6.52965e-89
1795.38	-5.04306e-05	-2.04033e-05	-2.3889e-227	2.07386e-74	-1.95943e-05	-8.0926e-07	4.43214e-56	2.60883e-10	2.18073e-87	2.18073e-87
1796.03	-5.38714e-05	-1.86522e-05	-1.82847e-224	2.82565e-73	-1.81851e-05	-4.67217e-07	8.00777e-55	1.17252e-10	7.05105e-86	7.05105e-86
1796.67	-5.31421e-05	-1.64624e-05	-1.34055e-221	3.76937e-72	-1.62035e-05	-2.58975e-07	1.39592e-53	5.0777e-11	2.20721e-84	2.20721e-84
1797.31	-4.93509e-05	-1.39993e-05	-9.41427e-219	4.92297e-71	-1.38615e-05	-1.37818e-07	2.34781e-52	2.11878e-11	6.68916e-83	6.68916e-83
1797.95	-4.22422e-05	-1.14552e-05	-6.33281e-216	6.295e-70	-1.13847e-05	-7.04149e-08	3.80992e-51	8.51877e-12	1.96263e-81	1.96263e-81
1798.6	-3.32742e-05	-9.01181e-06	-4.0805e-213	7.88086e-69	-8.97727e-06	-3.45407e-08	5.96513e-50	3.3002e-12	5.57497e-80	5.57497e-80
1799.24	-2.6453e-05	-6.81259e-06	-2.51847e-210	9.65964e-68	-6.79633e-06	-1.6267e-08	9.01104e-49	1.2319e-12	1.53315e-78	1.53315e-78
1799.88	-2.44063e-05	-4.9472e-06	-1.48891e-207	1.1592e-66	-4.93985e-06	-7.35517e-09	1.31335e-47	4.43082e-13	4.08194e-77	4.08194e-77
1800.53	-2.61929e-05	-3.45036e-06	-8.43149e-205	1.36196e-65	-3.44716e-06	-3.19291e-09	1.84689e-46	1.53555e-13	1.05217e-75	1.05217e-75
1801.17	-2.85394e-05	-2.31084e-06	-4.5735e-202	1.56668e-64	-2.30951e-06	-1.33073e-09	2.50582e-45	5.12763e-14	2.62569e-74	2.62569e-74
1801.81	-2.91037e-05	-1.48608e-06	-2.37629e-199	1.76443e-63	-1.48555e-06	-5.3248e-10	3.28028e-44	1.64984e-14	6.34367e-73	6.34367e-73
1802.45	-2.68475e-05	-9.17611e-07	-1.18265e-196	1.94554e-62	-9.17406e-07	-2.04562e-10	4.14307e-43	5.11491e-15	1.4838e-71	1.4838e-71
1803.1	-2.02109e-05	-5.4401e-07	-5.63797e-194	2.10032e-61	-5.43935e-07	-7.54494e-11	5.04878e-42	1.52794e-15	3.36006e-70	3.36006e-70
1803.74	-9.31018e-06	-3.09655e-07	-2.57451e-191	2.21993e-60	-3.09628e-07	-2.67175e-11	5.9361e-41	4.39793e-16	7.36646e-69	7.36646e-69
1804.38	2.20663e-06	-1.69226e-07	-1.12609e-188	2.29721e-59	-1.69217e-07	-9.08332e-12	6.73392e-40	1.21973e-16	1.56354e-67	1.56354e-67
1805.03	8.6726e-06	-8.87913e-08	-4.71802e-186	2.32742e-58	-8.87883e-08	-2.96485e-12	7.37031e-39	3.25948e-17	3.21289e-66	3.21289e-66
1805.67	6.8199e-06	-4.47287e-08	-1.89344e-183	2.30864e-57	-4.47278e-08	-9.29116e-13	7.78314e-38	8.39278e-18	6.39179e-65	6.39179e-65
1806.31	-1.14884e-07	-2.16328e-08	-7.27866e-181	2.24206e-56	-2.16325e-08	-2.79541e-13	7.93004e-37	2.08227e-18	1.23108e-63	1.23108e-63
1806.95	-4.56635e-06	-1.0045e-08	-2.68014e-178	2.13181e-55	-1.00449e-08	-8.0748e-14	7.79556e-36	4.97782e-19	2.29556e-62	2.29556e-62
1807.6	-4.96413e-07	-4.47814e-09	-9.45303e-176	1.98454e-54	-4.47812e-09	-2.23937e-14	7.39384e-35	1.1466e-19	4.1441e-61	4.1441e-61
1808.24	9.97464e-06	-1.9167e-09	-3.19368e-173	1.80876e-53	-1.9167e-09	-5.96252e-15	6.7662e-34	2.54484e-20	7.24286e-60	7.24286e-60
1808.88	1.80583e-05	-7.87628e-10	-1.03352e-170	1.61402e-52	-7.87627e-10	-1.5242e-15	5.97408e-33	5.44226e-21	1.22554e-58	1.22554e-58
1809.52	1.61955e-05	-3.1074e-10	-3.2037e-168	1.4101e-51	-3.10739e-10	-3.7408e-16	5.08919e-32	1.12143e-21	2.00763e-57	2.00763e-57
1810.17	4.74693e-06	-1.17701e-10	-9.51247e-166	1.20614e-50	-1.17701e-10	-8.81446e-17	4.1829e-31	2.22656e-22	3.18404e-56	3.18404e-56
1810.81	-9.07932e-06	-4.28032e-11	-2.70546e-163	1.01008e-49	-4.28032e-11	-1.99405e-17	3.31709e-30	4.25962e-23	4.88889e-55	4.88889e-55
1811.45	-1.75612e-05	-1.49444e-11	-7.37048e-161	8.28176e-49	-1.49444e-11	-4.33097e-18	2.53798e-29	7.85197e-24	7.26744e-54	7.26744e-54
1812.1	-1.72831e-05	-5.00947e-12	-1.92335e-158	6.64813e-48	-5.00947e-12	-9.03117e-19	1.87358e-28	1.39463e-24	1.0459e-52	1.0459e-52
1812.74	-1.17957e-05	-1.61218e-12	-4.80757e-156	5.22499e-47	-1.61218e-12	-1.80805e-19	1.33446e-27	2.38678e-25	1.45726e-51	1.45726e-51
1813.38	-8.62821e-06	-4.98132e-13	-1.15107e-153	4.02051e-46	-4.98132e-13	-3.47527e-20	9.17047e-27	3.93583e-26	1.96573e-50	1.96573e-50
1814.02	-1.19273e-05	-1.47769e-13	-2.63987e-151	3.02891e-45	-1.47769e-13	-6.41318e-21	6.08035e-26	6.25365e-27	2.56713e-49	2.56713e-49
1814.67	-1.70778e-05	-4.20855e-14	-5.79926e-149	2.2341e-44	-4.20855e-14	-1.13624e-21	3.88971e-25	9.5742e-28	3.24572e-48	3.24572e-48
1815.31	-1.68642e-05	-1.15078e-14	-1.22031e-146	1.61334e-43	-1.15078e-14	-1.93274e-22	2.4008e-24	1.41236e-28	3.97294e-47	3.97294e-47
1815.95	-9.89743e-06	-3.02105e-15	-2.45964e-144	1.14067e-42	-3.02105e-15	-3.15635e-23	1.42971e-23	2.00751e-29	4.70816e-46	4.70816e-46
1816.6	-3.31717e-07	-7.61438e-16	-4.74877e-142	7.89593e-42	-7.61438e-16	-4.94889e-24	8.21467e-23	2.74944e-30	5.40168e-45	5.40168e-45
1817.24	9.5042e-06	-1.84255e-16	-8.7821e-140	5.35126e-41	-1.84255e-16	-7.44971e-25	4.55391e-22	3.62829e-31	5.99991e-44	5.99991e-44
1817.88	1.93379e-05	-4.28045e-17	-1.55569e-137	3.55073e-40	-4.2807e-17	-1.07666e-25	2.43573e-21	4.61352e-32	6.45207e-43	6.45207e-43
1818.52	2.67288e-05	-9.53555e-18	-2.63969e-135	2.30669e-39	-9.54812e-18	-1.49393e-26	1.25697e-20	5.65243e-33	6.71725e-42	6.71725e-42
1819.17	2.68446e-05	-1.98212e-18	-4.29032e-133	1.46714e-38	-2.04471e-18	-1.99016e-27	6.25855e-20	6.67282e-34	6.77052e-41	6.77052e-41
1819.81	1.91671e-05	-1.19732e-19	-6.67935e-131	9.13611e-38	-4.2039e-19	-2.5454e-28	3.00658e-19	7.59026e-35	6.6068e-40	6.6068e-40
1820.45	9.85338e-06	1.31057e-18	-9.9606e-129	5.57008e-37	-8.2982e-20	-3.1256e-29	1.39355e-18	8.3191e-36	6.24164e-39	6.24164e-39
1821.1	6.23436e-06	6.21626e-18	-1.4228e-126	3.32484e-36	-1.57262e-20	-3.68484e-30	6.23198e-18	8.78552e-37	5.70879e-38	5.70879e-38
1821.74	9.63927e-06	2.68864e-17	-1.94674e-124	1.94308e-35	-2.86136e-21	-4.17075e-31	2.68893e-17	8.93987e-38	5.05508e-37	5.05508e-37
1822.38	1.55822e-05	1.11939e-16	-2.55141e-122	1.11178e-34	-4.99841e-22	-4.5323e-32	1.1194e-16	8.76531e-39	4.33362e-36	4.33362e-36
1823.02	1.82471e-05	4.49615e-16	-3.20302e-120	6.22812e-34	-8.38299e-23	-4.72859e-33	4.49615e-16	8.28086e-40	3.59676e-35	3.59676e-35
1823.67	1.58341e-05	1.7424e-15	-3.85163e-118	3.41589e-33	-1.34982e-23	-4.73647e-34	1.7424e-15	7.538e-41	2.89008e-34	2.89008e-34
1824.31	1.0663e-05	6.51489e-15	-4.43647e-116	1.83426e-32	-2.08671e-24	-4.55498e-35	6.51489e-15	6.61163e-42	2.24827e-33	2.24827e-33
1824.95	5.29989e-06	2.35027e-14	-4.89483e-114	9.64335e-32	-3.09711e-25	-4.20559e-36	2.35027e-14	5.58771e-43	1.69326e-32	1.69326e-32
1825.6	-1.42602e-06	8.18049e-14	-5.17301e-112	4.96368e-31	-4.41327e-26	-3.72801e-37	8.18049e-14	4.5502e-44	1.23463e-31	1.23463e-31
1826.24	-1.1695e-05	2.74721e-13	-5.23669e-110	2.50143e-30	-6.03772e-27	-3.17275e-38	2.74721e-13	3.57026e-45	8.71545e-31	8.71545e-31
1826.88	-2.38763e-05	8.90137e-13	-5.07782e-108	1.2342e-29	-7.93041e-28	-2.59241e-39	8.90137e-13	2.69924e-46	5.95635e-30	5.95635e-30
1827.52	-3.1802e-05	2.78274e-12	-4.71633e-106	5.96195e-29	-1.00006e-28	-2.03367e-40	2.78274e-12	1.96633e-47	3.94103e-29	3.94103e-29
1828.17	-2.9766e-05	8.39344e-12	-4.19603e-104	2.81969e-28	-1.21079e-29	-1.53168e-41	8.39344e-12	1.3802e-48	2.52451e-28	2.52451e-28
1828.81	-1.8239e-05	2.44264e-11	-3.57585e-102	1.30565e-27	-1.4074e-30	-1.10755e-42	2.44264e-11	9.33469e-50	1.56561e-27	1.56561e-27
1829.45	-2.90317e-06	6.85849e-11	-2.91895e-100	5.91913e-27	-1.57064e-31	-7.68897e-44	6.85849e-11	6.08318e-51	9.39996e-27	9.39996e-27
1830.09	9.91826e-06	1.85802e-10	-2.28235e-98	2.62724e-26	-1.68284e-32	-5.12486e-45	1.85802e-10	3.81974e-52	5.46397e-26	5.46397e-26
1830.74	1.73927e-05	4.85649e-10	-1.7094e-96	1.1417e-25	-1.73109e-33	-3.27948e-46	4.85649e-10	2.31104e-53	3.07488e-25	3.07488e-25
1831.38	2.08561e-05	1.22475e-09	-1.22634e-94	4.85751e-25	-1.70965e-34	-2.01482e-47	1.22475e-09	1.34727e-54	1.67528e-24	1.67528e-24
1832.02	2.17115e-05	2.98004e-09	-8.42728e-93	2.02341e-24	-1.62107e-35	-1.18844e-48	2.98004e-09	7.56789e-56	8.83659e-24	8.83659e-24
1832.67	2.01136e-05	6.99599e-09	-5.54715e-91	8.25209e-24	-1.47573e-36	-6.7302e-50	6.99599e-09	4.09606e-57	4.51253e-23	4.51253e-23
1833.31	1.57404e-05	1.58463e-08	-3.49751e-89	3.29499e-23	-1.28979e-37	-3.65921e-51	1.58463e-08	2.13614e-58	2.23097e-22	2.23097e-22
1833.95	1.06169e-05	3.46303e-08	-2.1123e-87	1.28811e-22	-1.08228e-38	-1.9101e-52	3.46303e-08	1.07341e-59	1.06784e-21	1.06784e-21
1834.59	7.79965e-06	7.30193e-08	-1.22196e-85	4.93016e-22	-8.71913e-40	-9.57267e-54	7.30193e-08	5.19727e-61	4.94831e-21	4.94831e-21
1835.24	7.37622e-06	1.48549e-07	-6.77124e-84	1.84748e-21	-6.74394e-41	-4.60596e-55	1.48549e-07	2.42469e-62	2.21996e-20	2.21996e-20
1835.88	5.73113e-06	2.91577e-07	-3.59405e-82	6.77808e-21	-5.00799e-42	-2.12773e-56	2.91577e-07	1.08995e-63	9.64212e-20	9.64212e-20
1836.52	1.18602e-06	5.5219e-07	-1.82729e-80	2.43469e-20	-3.57045e-43	-9.43671e-58	5.5219e-07	4.72099e-65	4.05451e-19	4.05451e-19
1837.17	-3.21021e-06	1.00896e-06	-8.89895e-79	8.5623e-20	-2.44394e-44	-4.01823e-59	1.00896e-06	1.97029e-66	1.6506e-18	1.6506e-18
1837.81	-2.59075e-06	1.77874e-06	-4.15123e-77	2.94813e-19	-1.60608e-45	-1.6427e-60	1.77874e-06	7.92319e-68	6.50555e-18	6.50555e-18
1838.45	3.5339e-06	3.02554e-06	-1.8549e-75	9.93829e-19	-1.01334e-46	-6.44748e-62	3.02554e-06	3.07003e-69	2.48236e-17	2.48236e-17
1839.09	1.17938e-05	4.96527e-06	-7.93912e-74	3.2801e-18	-6.13833e-48	-2.42958e-63	4.96527e-06	1.14619e-70	9.17028e-17	9.17028e-17
1839.74	1.90721e-05	7.86203e-06	-3.25485e-72	1.05992e-17	-3.56989e-49	-8.78986e-65	7.86203e-06	4.12327e-72	3.27974e-16	3.27974e-16
1840.38	2.33957e-05	1.2011e-05	-1.27819e-70	3.35324e-17	-1.99328e-50	-3.0531e-66	1.2011e-05	1.42923e-73	1.13563e-15	1.13563e-15
1841.02	2.35216e-05	1.77041e-05	-4.80803e-69	1.03865e-16	-1.06854e-51	-1.01815e-67	1.77041e-05	4.77344e-75	3.80688e-15	3.80688e-15
1841.67	2.00432e-05	2.51779e-05	-1.73239e-67	3.14979e-16	-5.4995e-53	-3.25978e-69	2.51779e-05	1.53615e-76	1.23549e-14	1.23549e-14
1842.31	1.67426e-05	3.45475e-05	-5.97905e-66	9.35198e-16	-2.71746e-54	-1.00202e-70	3.45475e-05	4.76332e-78	3.88196e-14	3.88196e-14
1842.95	1.76404e-05	4.57367e-05	-1.97663e-64	2.71854e-15	-1.28918e-55	-2.95714e-72	4.57367e-05	1.42317e-79	1.18086e-13	1.18086e-13
1843.59	2.31956e-05	5.84205e-05	-6.25928e-63	7.73707e-15	-5.87183e-57	-8.3787e-74	5.84205e-05	4.0971e-81	3.47765e-13	3.47765e-13
1844.24	3.1647e-05	7.19974e-05	-1.89859e-61	2.15589e-14	-2.56769e-58	-2.27924e-75	7.19974e-05	1.1365e-82	9.91543e-13	9.91543e-13
1844.88	4.2932e-05	8.56091e-05	-5.51625e-60	5.88149e-14	-1.078e-59	-5.9527e-77	8.56091e-05	3.03761e-84	2.737e-12	2.737e-12
1845.52	5.80606e-05	9.82142e-05	-1.5352e-58	1.57093e-13	-4.34516e-61	-1.49261e-78	9.82141e-05	7.82291e-86	7.31437e-12	7.31437e-12
1846.17	7.6173e-05	0.000108713	-4.09253e-57	4.10805e-13	-1.68152e-62	-3.59326e-80	0.000108713	1.94123e-87	1.89242e-11	1.89242e-11
1846.81	9.30451e-05	0.000116101	-1.04502e-55	1.05178e-12	-6.2475e-64	-8.30499e-82	0.000116101	4.64149e-89	4.74019e-11	4.74019e-11
1847.45	0.000104337	0.000119632	-2.55603e-54	2.63647e-12	-2.22854e-65	-1.84289e-83	0.000119631	1.06933e-90	1.14951e-10	1.14951e-10
1848.09	0.000107919	0.000118934	-5.98845e-53	6.47039e-12	-7.63209e-67	-3.92616e-85	0.000118934	2.37375e-92	2.69878e-10	2.69878e-10
1848.74	0.000104986	0.000114082	-1.34391e-51	1.5547e-11	-2.50943e-68	-8.03057e-87	0.000114082	5.0773e-94	6.13424e-10	6.13424e-10
1849.38	9.83261e-05	0.000105581	-2.88889e-50	3.65741e-11	-7.92168e-70	-1.57701e-88	0.000105579	1.04641e-95	1.34987e-09	1.34987e-09
1850.02	9.13616e-05	9.42771e-05	-5.94839e-49	8.42384e-11	-2.40086e-71	-2.97324e-90	9.42741e-05	2.078e-97	2.87583e-09	2.87583e-09
1850.66	8.57993e-05	8.12252e-05	-1.17321e-47	1.89957e-10	-6.98598e-73	-5.3819e-92	8.1219e-05	3.97611e-99	5.93159e-09	5.93159e-09
1851.31	8.10578e-05	6.75233e-05	-2.21645e-46	4.19382e-10	-1.95162e-74	-9.35299e-94	6.7511e-05	7.3307e-101	1.18445e-08	1.18445e-08
1851.95	7.47119e-05	5.41668e-05	-4.01094e-45	9.06514e-10	-5.23448e-76	-1.56054e-95	5.4143e-05	1.30228e-102	2.28983e-08	2.28983e-08
1852.59	6.51148e-05	4.19398e-05	-6.95253e-44	1.91844e-09	-1.34791e-77	-2.49981e-97	4.1895e-05	2.22913e-104	4.28575e-08	4.28575e-08
1853.24	5.5008e-05	3.13592e-05	-1.15437e-42	3.97495e-09	-3.3324e-79	-3.84458e-99	3.12776e-05	3.67653e-106	7.76583e-08	7.76583e-08
1853.88	4.72521e-05	2.2674e-05	-1.83593e-41	8.06352e-09	-7.90973e-81	-5.67675e-101	2.25297e-05	5.84269e-108	1.36235e-07	1.36235e-07
1854.52	4.19809e-05	1.59051e-05	-2.79687e-40	1.6015e-08	-1.8025e-82	-8.04749e-103	1.56577e-05	8.94665e-110	2.3138e-07	2.3138e-07
1855.16	3.6437e-05	1.09107e-05	-4.08128e-39	3.11415e-08	-3.94366e-84	-1.09529e-104	1.04991e-05	1.32002e-111	3.80455e-07	3.80455e-07
1855.81	3.04674e-05	7.45743e-06	-5.70462e-38	5.92871e-08	-8.28385e-86	-1.43123e-106	6.7925e-06	1.8766e-113	6.05645e-07	6.05645e-07
1856.45	2.79864e-05	5.28383e-06	-7.63773e-37	1.10507e-07	-1.6706e-87	-1.79554e-108	4.23992e-06	2.57061e-115	9.33407e-07	9.33407e-07
1857.09	3.10425e-05	4.14788e-06	-9.7951e-36	2.01665e-07	-3.23463e-89	-2.16268e-110	2.5535e-06	3.39291e-117	1.39272e-06	1.39272e-06
1857.74	3.52314e-05	3.85592e-06	-1.20326e-34	3.60314e-07	-6.01291e-91	-2.50091e-112	1.48377e-06	4.315e-119	2.01184e-06	2.01184e-06
1858.38	3.49906e-05	4.27574e-06	-1.41585e-33	6.30289e-07	-1.07313e-92	-2.7766e-114	8.31857e-07	5.28764e-121	2.81359e-06	2.81359e-06
1859.02	2.9589e-05	5.33893e-06	-1.59582e-32	1.07947e-06	-1.83879e-94	-2.95963e-116	4.49968e-07	6.24855e-123	3.8095e-06	3.8095e-06
1859.66	2.31979e-05	7.03845e-06	-1.72288e-31	1.81003e-06	-3.02495e-96	-3.0288e-118	2.34837e-07	5.08921e-124	4.99358e-06	4.99358e-06
1860.31	1.85768e-05	9.42691e-06	-1.7817e-30	2.97149e-06	-4.77766e-98	-2.97586e-120	1.1825e-07	3.53465e-122	6.33717e-06	6.33717e-06
1860.95	1.56092e-05	1.26196e-05	-1.7649e-29	4.77608e-06	-7.2447e-100	-2.80714e-122	5.74499e-08	2.7527e-120	7.78605e-06	7.78605e-06
1861.59	1.37649e-05	1.68042e-05	-1.67461e-28	7.51585e-06	-1.05472e-101	-2.54229e-124	2.69295e-08	2.06839e-118	9.2614e-06	9.2614e-06
1862.24	1.44844e-05	2.22571e-05	-1.52199e-27	1.15796e-05	-1.47421e-103	-2.21052e-126	1.21792e-08	1.49954e-116	1.06653e-05	1.06653e-05
1862.88	2.03965e-05	2.93632e-05	-1.32501e-26	1.7467e-05	-1.9783e-105	-1.84533e-128	5.31446e-09	1.0489e-114	1.18908e-05	1.18908e-05
1863.52	3.40854e-05	3.86331e-05	-1.10493e-25	2.57961e-05	-2.54879e-107	-1.47897e-130	2.23744e-09	7.07885e-113	1.28347e-05	1.28347e-05
1864.16	5.62202e-05	5.07122e-05	-8.82578e-25	3.72992e-05	-3.15271e-109	-1.13804e-132	9.08858e-10	4.60937e-111	1.34122e-05	1.34122e-05
1864.81	8.33947e-05	6.63717e-05	-6.75274e-24	5.28023e-05	-3.74408e-111	-8.40744e-135	3.56198e-10	2.89583e-109	1.35691e-05	1.35691e-05
1865.45	0.000109483	8.64746e-05	-4.94897e-23	7.3184e-05	-4.26888e-113	-5.9632e-137	1.34691e-10	1.75531e-107	1.32905e-05	1.32905e-05
1866.09	0.000130259	0.000111912	-3.47421e-22	9.93091e-05	-4.67297e-115	-4.06072e-139	4.91402e-11	1.02657e-105	1.26028e-05	1.26028e-05
1866.74	0.000147331	0.000143509	-2.33616e-21	0.000131938	-4.91112e-117	-2.65483e-141	1.72976e-11	5.79259e-104	1.157e-05	1.157e-05
1867.38	0.00016646	0.000181902	-1.50473e-20	0.000171618	-4.95538e-119	-1.6664e-143	5.87472e-12	3.15362e-102	1.02835e-05	1.02835e-05
1868.02	0.00019406	0.000227406	-9.28367e-20	0.000218557	-4.80046e-121	-1.00423e-145	1.92504e-12	1.65652e-100	8.84876e-06	8.84876e-06
1868.66	0.000236021	0.000279877	-5.48641e-19	0.000272506	-4.46475e-123	-5.81021e-148	6.08616e-13	8.39528e-99	7.37164e-06	7.37164e-06
1869.31	0.000295257	0.000338602	-3.10573e-18	0.000332656	-3.98677e-125	-3.22749e-150	1.85652e-13	4.10511e-97	5.94544e-06	5.94543e-06
1869.95	0.000369947	0.000402223	-1.68402e-17	0.000397581	-3.41786e-127	-1.91118e-152	5.46393e-14	1.93672e-95	4.6424e-06	4.64239e-06
1870.59	0.000453123	0.000468736	-8.74653e-17	0.000465227	-2.81318e-129	-1.52187e-151	1.55154e-14	8.81576e-94	3.50947e-06	3.50944e-06
1871.23	0.000536662	0.000535551	-4.35143e-16	0.000532983	-2.27614e-131	-1.18396e-149	4.25082e-15	3.87172e-92	2.56855e-06	2.56846e-06
1871.88	0.000614162	0.000599642	-2.07365e-15	0.000597821	-5.19578e-131	-8.95914e-148	1.12365e-15	1.64059e-90	1.82018e-06	1.81989e-06
1872.52	0.000682065	0.000657756	-9.46553e-15	0.000656507	-4.87369e-129	-6.59036e-146	2.86579e-16	6.70729e-89	1.24925e-06	1.24841e-06
1873.16	0.000737036	0.000706688	-4.13868e-14	0.000705856	-4.42515e-127	-4.71266e-144	7.05193e-17	2.64573e-87	8.31475e-07	8.29098e-07
1873.81	0.000777556	0.000743563	-1.73335e-13	0.000743024	-3.87658e-125	-3.27595e-142	1.67426e-17	1.00692e-85	5.39441e-07	5.33082e-07
1874.45	0.000803149	0.000766119	-6.95371e-13	0.000765771	-3.27659e-123	-2.21373e-140	3.83521e-18	3.6974e-84	3.4804e-07	3.31833e-07
1875.09	0.000812579	0.000772928	-2.67211e-12	0.000772688	-2.67206e-121	-1.4542e-138	8.4763e-19	1.30993e-82	2.39325e-07	1.99979e-07
1875.73	0.000802884	0.00076355	-9.83555e-12	0.000763342	-2.10243e-119	-9.28627e-137	1.80749e-19	4.47768e-81	2.0767e-07	1.16678e-07
1876.38	0.000771747	0.000738585	-3.46777e-11	0.000738319	-1.59606e-117	-5.76463e-135	3.71874e-20	1.47675e-79	2.66354e-07	6.59065e-08
1877.02	0.000720453	0.000699619	-1.17114e-10	0.000699162	-1.16903e-115	-3.4787e-133	7.38188e-21	4.6991e-78	4.56658e-07	3.60419e-08
1877.66	0.000654106	0.000649078	-3.78855e-10	0.000648218	-8.26145e-114	-2.04069e-131	1.41381e-21	1.44269e-76	8.59825e-07	1.90821e-08
1878.31	0.00057947	0.000590012	-1.17394e-09	0.000588402	-5.63297e-112	-1.16373e-129	2.61255e-22	4.27349e-75	1.61057e-06	9.78097e-09
1878.95	0.000503032	0.000525826	-3.48437e-09	0.000522922	-3.70569e-110	-6.45119e-128	4.6579e-23	1.22136e-73	2.90818e-06	4.85374e-09
1879.59	0.000430136	0.000460005	-9.90627e-09	0.000454997	-2.35209e-108	-3.47651e-126	8.01249e-24	3.36787e-72	5.01824e-06	2.33189e-09
1880.23	0.000364688	0.000395834	-2.69776e-08	0.000387605	-1.44042e-106	-1.82122e-124	1.32983e-24	8.96022e-71	8.25569e-06	1.08463e-09
1880.88	0.000308914	0.000336151	-7.03725e-08	0.000323281	-8.51089e-105	-9.2746e-123	2.12949e-25	2.30003e-69	1.29405e-05	4.88415e-10
1881.52	0.000262386	0.000283133	-1.75837e-07	0.000263986	-4.85191e-103	-4.59138e-121	3.29008e-26	5.69639e-68	1.93228e-05	2.1293e-10
1882.16	0.000224413	0.000238116	-4.20846e-07	0.000211053	-2.66871e-101	-2.20956e-119	4.90444e-27	1.36119e-66	2.74846e-05	8.98717e-11
1882.81	0.000194119	0.000201475	-9.64813e-07	0.0001652	-1.41626e-99	-1.03367e-117	7.0538e-28	3.13824e-65	3.72394e-05	3.67238e-11
1883.45	0.000168737	0.000172546	-2.1187e-06	0.000126601	-7.25161e-98	-4.70084e-116	9.78833e-29	6.98083e-64	4.80629e-05	1.45281e-11
1884.09	0.000142624	0.000149622	-4.45661e-06	9.49898e-05	-3.58243e-96	-2.07819e-114	1.31053e-29	1.49823e-62	5.90892e-05	5.56431e-12
1884.73	0.000111548	0.000129999	-8.97937e-06	6.9779e-05	-1.70755e-94	-8.93138e-113	1.69291e-30	3.10243e-61	6.91989e-05	2.06324e-12
1885.38	7.67311e-05	0.00011005	-1.73298e-05	5.0186e-05	-7.8527e-93	-3.73177e-111	2.10995e-31	6.19836e-60	7.71938e-05	7.40675e-13
1886.02	4.21057e-05	8.53292e-05	-3.20368e-05	3.53388e-05	-3.48431e-91	-1.51646e-109	2.53725e-32	1.19482e-58	8.20272e-05	2.57421e-13
1886.66	5.63947e-06	5.06617e-05	-5.67297e-05	2.43633e-05	-1.49164e-89	-6.00269e-108	2.94378e-33	2.22218e-57	8.30281e-05	8.6616e-14
1887.31	-4.18746e-05	2.77012e-07	-9.6223e-05	1.64457e-05	-6.1612e-88	-2.32936e-106	3.29533e-34	3.98757e-56	8.00543e-05	2.82157e-14
1887.95	-0.000109267	-7.19383e-05	-0.000156334	1.08709e-05	-2.45537e-86	-9.08351e-105	3.55913e-35	6.90381e-55	7.35252e-05	8.8986e-15
1888.59	-0.000198262	-0.000171932	-0.000243297	7.04036e-06	-9.44104e-85	-3.86517e-103	3.70886e-36	1.15324e-53	6.4325e-05	2.71701e-15
1889.23	-0.000306923	-0.000304601	-0.000362682	4.47536e-06	-3.50247e-83	-2.14775e-101	3.72897e-37	1.85867e-52	5.36062e-05	8.03153e-16
1889.88	-0.000437242	-0.000472508	-0.000517872	2.80969e-06	-1.25366e-81	-1.75884e-99	3.61732e-38	2.89026e-51	4.25543e-05	2.2985e-16
1890.52	-0.000595028	-0.000674357	-0.000708314	1.7779e-06	-4.32949e-80	-1.84821e-97	3.38562e-39	4.33633e-50	3.21783e-05	6.36837e-17
1891.16	-0.000782977	-0.000903593	-0.000927974	1.20275e-06	-1.4426e-78	-2.07427e-95	3.05731e-40	6.27711e-49	2.3178e-05	1.70825e-17
1891.81	-0.000995721	-0.00114765	-0.00116454	9.85207e-07	-4.63773e-77	-2.28738e-93	2.66375e-41	8.76693e-48	1.5903e-05	4.4362e-18
1892.45	-0.0012211	-0.00138834	-0.00139983	1.09892e-06	-1.43852e-75	-2.41464e-91	2.23922e-42	1.18137e-46	1.03938e-05	1.11535e-18
1893.09	-0.00144201	-0.00160372	-0.00161179	1.58954e-06	-4.30506e-74	-2.42231e-89	1.81616e-43	1.53595e-45	6.47089e-06	2.71486e-19
1893.73	-0.00163669	-0.00177123	-0.00177764	2.5778e-06	-1.24306e-72	-2.30457e-87	1.42122e-44	1.92673e-44	3.83746e-06	6.3977e-20
1894.38	-0.00178087	-0.00187154	-0.00187797	4.26322e-06	-3.46305e-71	-2.07818e-85	1.07305e-45	2.33192e-43	2.16779e-06	1.45961e-20
1895.02	-0.00185393	-0.00189229	-0.00190038	6.92324e-06	-9.30841e-70	-1.77599e-83	7.81681e-47	2.72308e-42	1.16649e-06	3.22396e-21
1895.66	-0.00184607	-0.00183054	-0.00184204	1.09012e-05	-2.41403e-68	-1.43826e-81	5.49403e-48	3.06801e-41	5.97913e-07	6.89415e-22
1896.3	-0.00175921	-0.0016934	-0.00171027	1.65765e-05	-6.04036e-67	-1.10375e-79	3.72566e-49	3.33506e-40	2.91935e-07	1.42728e-22
1896.95	-0.0016042	-0.00149658	-0.00152103	2.43115e-05	-1.45826e-65	-8.02669e-78	2.43763e-50	3.49787e-39	1.35777e-07	2.86073e-23
1897.59	-0.0013955	-0.0012613	-0.00129573	3.4376e-05	-3.39669e-64	-5.5314e-76	1.5388e-51	3.5396e-38	6.01535e-08	5.55115e-24
1898.23	-0.00115137	-0.00101043	-0.00105731	4.68563e-05	-7.6336e-63	-3.61216e-74	9.37239e-53	3.45586e-37	2.53855e-08	1.04286e-24
1898.88	-0.000895675	-0.000764833	-0.000826408	6.15644e-05	-1.65522e-61	-2.23527e-72	5.50768e-54	3.25544e-36	1.02048e-08	1.89675e-25
1899.52	-0.000655673	-0.000540744	-0.00061872	7.79714e-05	-3.46283e-60	-1.31077e-70	3.12276e-55	2.95879e-35	3.90789e-09	3.33987e-26
1900.16	-0.00045273	-0.000348522	-0.000443711	9.5188e-05	-6.9897e-59	-7.28376e-69	1.70828e-56	2.5946e-34	1.42692e-09	5.69362e-27
1900.8	-0.000294214	-0.000192785	-0.000304799	0.000112014	-1.36125e-57	-3.83545e-67	9.01637e-58	2.19522e-33	5.03696e-10	9.39693e-28
1901.45	-0.00017433	-7.34981e-05	-0.000200555	0.000127057	-2.55781e-56	-1.91386e-65	4.59151e-59	1.79199e-32	2.04957e-10	1.50149e-28
1902.09	-8.29669e-05	1.25172e-05	-0.000126404	0.000138921	-4.63714e-55	-9.04974e-64	2.25596e-60	1.41139e-31	2.33629e-10	2.32271e-29
1902.73	-1.24389e-05	7.01008e-05	-7.63126e-05	0.000146413	-8.11116e-54	-4.05503e-62	1.06944e-61	1.07253e-30	7.52711e-10	3.47862e-30
1903.38	4.03742e-05	0.000104613	-4.41304e-05	0.00014874	-1.36889e-52	-1.72181e-60	4.89142e-63	7.8636e-30	2.73457e-09	5.0438e-31
1904.02	7.62126e-05	0.000121218	-2.44448e-05	0.000145653	-2.22897e-51	-6.92801e-59	2.15856e-64	5.5627e-29	9.24332e-09	7.08022e-32
1904.66	9.59246e-05	0.000124542	-1.29702e-05	0.000137484	-3.5018e-50	-2.64158e-57	9.19063e-66	3.79666e-28	2.85989e-08	9.62219e-33
1905.3	0.000102836	0.000118579	-6.59242e-06	0.00012509	-5.30798e-49	-9.54447e-56	3.77552e-67	2.50017e-27	8.08919e-08	1.26602e-33
1905.95	0.000103059	0.000106706	-3.21083e-06	0.000109708	-7.76282e-48	-3.26793e-54	1.49644e-68	1.5885e-26	2.09146e-07	1.61266e-34
1906.59	0.00010186	9.17379e-05	-1.50126e-06	9.27449e-05	-1.09537e-46	-1.06029e-52	5.72262e-70	9.73772e-26	4.9429e-07	1.98877e-35
1907.23	0.000101441	7.59629e-05	-6.80876e-07	7.5576e-05	-1.49126e-45	-3.25994e-51	2.11145e-71	5.75942e-25	1.06782e-06	2.37446e-36
1907.88	0.000100593	6.11552e-05	-3.16724e-07	5.93633e-05	-1.95884e-44	-9.49791e-50	7.51656e-73	3.28663e-24	2.10864e-06	2.74463e-37
1908.52	9.86443e-05	4.85625e-05	-1.89881e-07	4.49462e-05	-2.48252e-43	-2.62227e-48	2.58171e-74	1.80957e-23	3.8062e-06	3.07144e-38
1909.16	9.56551e-05	3.88718e-05	-2.10846e-07	3.28026e-05	-3.03557e-42	-6.86057e-47	8.55555e-76	9.61281e-23	6.28009e-06	3.32764e-39
1909.8	9.20489e-05	3.21718e-05	-3.76035e-07	2.30762e-05	-3.58128e-41	-1.70089e-45	2.73552e-77	4.92694e-22	9.47167e-06	3.49036e-40
1910.45	8.82982e-05	2.79505e-05	-7.55407e-07	1.56481e-05	-4.07651e-40	-3.99597e-44	8.43884e-79	2.43644e-21	1.30579e-05	3.5444e-41
1911.09	8.4749e-05	2.51799e-05	-1.50352e-06	1.02282e-05	-4.47703e-39	-8.89615e-43	2.51175e-80	1.16248e-20	1.64553e-05	3.4846e-42
1911.73	8.14046e-05	2.25113e-05	-2.88798e-06	6.4443e-06	-4.74397e-38	-1.87678e-41	7.21312e-82	5.35138e-20	1.8955e-05	3.31667e-43
1912.38	7.69159e-05	1.85438e-05	-5.32843e-06	3.91376e-06	-4.85005e-37	-3.75196e-40	1.99857e-83	2.37683e-19	1.99585e-05	3.05625e-44
1913.02	6.85148e-05	1.2065e-05	-9.43569e-06	2.29114e-06	-4.78411e-36	-7.10781e-39	5.3428e-85	1.01855e-18	1.92095e-05	2.72655e-45
1913.66	5.38837e-05	2.15858e-06	-1.60345e-05	1.29286e-06	-4.5531e-35	-1.27598e-37	1.37806e-86	4.2113e-18	1.69002e-05	2.35493e-46
1914.3	3.38867e-05	-1.18535e-05	-2.61478e-05	7.0322e-07	-4.18086e-34	-2.17063e-36	3.42941e-88	1.67997e-17	1.35911e-05	1.96915e-47
1914.95	1.05763e-05	-3.0558e-05	-4.09175e-05	3.68699e-07	-3.70403e-33	-3.49914e-35	8.23422e-90	6.46607e-17	9.99082e-06	1.59412e-48
1915.59	-1.61185e-05	-5.45444e-05	-6.1444e-05	1.86334e-07	-3.16618e-32	-5.34524e-34	1.90756e-91	2.40121e-16	6.71327e-06	1.24939e-49
1916.23	-4.86677e-05	-8.43269e-05	-8.85411e-05	9.07725e-08	-2.61124e-31	-7.7376e-33	4.29308e-93	8.6034e-16	4.12338e-06	9.48015e-51
1916.87	-8.83826e-05	-0.000120077	-0.000122435	4.26242e-08	-2.07783e-30	-1.0614e-31	1.88454e-93	2.97414e-15	2.31504e-06	6.96419e-52
1917.52	-0.000135434	-0.000161258	-0.000162465	1.9293e-08	-1.59524e-29	-1.37969e-30	1.04821e-91	9.91985e-15	1.18809e-06	4.95295e-53
1918.16	-0.00018925	-0.000206311	-0.000206877	8.41748e-09	-1.18166e-28	-1.69949e-29	5.88483e-90	3.19227e-14	5.57346e-07	3.41032e-54
1918.8	-0.000248744	-0.000252546	-0.000252789	3.54002e-09	-8.44519e-28	-1.98375e-28	3.17256e-88	9.91164e-14	2.38994e-07	2.27335e-55
1919.45	-0.00030856	-0.000296319	-0.000296414	1.43506e-09	-5.82342e-27	-2.19426e-27	1.64289e-86	2.96922e-13	9.36775e-08	1.46715e-56
1920.09	-0.000359873	-0.000333496	-0.00033353	5.60757e-10	-3.87435e-26	-2.29996e-26	8.17939e-85	8.58206e-13	3.35637e-08	9.16687e-58
1920.73	-0.000397094	-0.000360124	-0.000360136	2.11213e-10	-2.48697e-25	-2.28447e-25	3.92458e-83	2.39327e-12	1.09923e-08	5.54506e-59
1921.37	-0.000419247	-0.000373155	-0.000373158	7.66841e-11	-1.54026e-24	-2.15023e-24	1.82624e-81	6.43937e-12	3.29075e-09	3.24735e-60
1922.02	-0.000427441	-0.000371034	-0.000371035	2.68369e-11	-9.20381e-24	-1.91785e-23	8.36966e-80	1.67165e-11	9.00505e-10	1.84116e-61
1922.66	-0.000419312	-0.000354023	-0.000354023	9.05313e-12	-5.30632e-23	-1.62098e-22	3.90721e-78	4.18697e-11	2.25249e-10	1.01063e-62
1923.3	-0.000392156	-0.000324148	-0.000324148	2.94379e-12	-2.95169e-22	-1.2983e-21	1.96937e-76	1.01183e-10	5.15023e-11	5.37069e-64
1923.95	-0.000348042	-0.000284807	-0.000284807	9.22687e-13	-1.58416e-21	-9.85375e-21	1.13943e-74	2.35919e-10	1.0764e-11	2.76316e-65
1924.59	-0.000293738	-0.000240133	-0.000240134	2.78768e-13	-8.20312e-21	-7.08699e-20	7.64029e-73	5.30727e-10	2.05641e-12	1.37633e-66
1925.23	-0.000237375	-0.000194289	-0.00019429	8.11843e-14	-4.09836e-20	-4.83008e-19	5.61767e-71	1.15194e-09	3.59113e-13	6.63705e-68
1925.87	-0.000183781	-0.000150847	-0.000150849	2.27899e-14	-1.97557e-19	-3.11946e-18	4.22889e-69	2.41236e-09	5.73241e-14	3.09861e-69
1926.52	-0.000133695	-0.000112386	-0.000112391	6.16669e-15	-9.18812e-19	-1.90914e-17	3.11372e-67	4.87421e-09	8.3643e-15	1.40054e-70
1927.16	-8.74649e-05	-8.03458e-05	-8.03553e-05	1.60843e-15	-4.12299e-18	-1.1072e-16	2.19118e-65	9.50207e-09	1.1156e-15	6.12865e-72
1927.8	-4.74467e-05	-5.51127e-05	-5.51306e-05	4.04384e-16	-1.78504e-17	-6.08484e-16	1.45849e-63	1.78724e-08	1.3601e-16	2.5964e-73
1928.45	-1.7324e-05	-3.62642e-05	-3.62966e-05	9.8e-17	-7.45653e-17	-3.16887e-15	9.14096e-62	3.24339e-08	1.51573e-17	1.06492e-74
1929.09	2.54625e-06	-2.28748e-05	-2.29316e-05	2.28928e-17	-3.00522e-16	-1.56384e-14	5.384e-60	5.67895e-08	1.54403e-18	4.22863e-76
1929.73	1.64306e-05	-1.38067e-05	-1.39027e-05	5.15479e-18	-1.1686e-15	-7.31326e-14	2.97765e-58	9.59372e-08	1.43773e-19	1.62563e-77
1930.37	2.81485e-05	-7.93193e-06	-8.0883e-06	1.11883e-18	-4.3844e-15	-3.24088e-13	1.54575e-56	1.56372e-07	1.22373e-20	6.05036e-79
1931.02	3.70565e-05	-4.26965e-06	-4.51556e-06	2.34077e-19	-1.5871e-14	-1.36097e-12	7.5305e-55	2.45912e-07	9.52092e-22	2.18012e-80
1931.66	4.05702e-05	-2.04602e-06	-2.41914e-06	4.72056e-20	-5.54304e-14	-5.41582e-12	3.44269e-53	3.73124e-07	6.77108e-23	7.60529e-82
1932.3	3.84562e-05	-6.97458e-07	-1.24367e-06	9.17632e-21	-1.86786e-13	-2.04227e-11	1.47688e-51	5.46233e-07	4.40172e-24	2.56857e-83
1932.95	3.34722e-05	1.57916e-07	-6.13543e-07	1.71943e-21	-6.07285e-13	-7.29785e-11	5.94509e-50	7.71532e-07	2.61561e-25	8.39854e-85
1933.59	2.91436e-05	7.60729e-07	-2.90455e-07	3.10556e-22	-1.90499e-12	-2.47121e-10	2.2456e-48	1.05143e-06	1.42072e-26	2.65861e-86
1934.23	2.81501e-05	1.24974e-06	-1.3195e-07	5.40676e-23	-5.76557e-12	-7.92968e-10	7.95915e-47	1.38249e-06	7.05394e-28	8.14789e-88
1934.87	2.97404e-05	1.69389e-06	-5.75221e-08	9.07349e-24	-1.68362e-11	-2.41121e-09	2.64704e-45	1.75384e-06	3.2014e-29	2.41754e-89
1935.52	2.96131e-05	2.11565e-06	-2.40633e-08	1.46775e-24	-4.74348e-11	-6.94777e-09	8.26061e-44	2.14671e-06	1.32811e-30	6.94448e-91
1936.16	2.29752e-05	2.5064e-06	-9.65985e-09	2.2886e-25	-1.28944e-10	-1.8971e-08	2.41892e-42	2.53516e-06	5.03633e-32	1.93128e-92
1936.8	1.04239e-05	2.83547e-06	-3.72118e-09	3.43977e-26	-3.38188e-10	-4.90869e-08	6.64646e-41	2.88862e-06	1.74574e-33	5.19981e-94
1937.44	-3.30818e-06	3.05301e-06	-1.37558e-09	4.98344e-27	-8.55786e-10	-1.20358e-07	1.71363e-39	3.1756e-06	5.53135e-35	1.3554e-95
1938.09	-1.33433e-05	3.08609e-06	-4.87964e-10	6.95936e-28	-2.08941e-09	-2.7965e-07	4.14573e-38	3.36832e-06	1.60202e-36	3.42049e-97
1938.73	-1.66773e-05	2.82627e-06	-1.66105e-10	9.36807e-29	-4.92191e-09	-6.15727e-07	9.41118e-37	3.44708e-06	4.24123e-38	8.35693e-99
1939.37	-1.34989e-05	2.10771e-06	-5.42594e-11	1.21555e-29	-1.11865e-08	-1.28468e-06	2.00468e-35	3.40362e-06	1.02636e-39	1.97671e-100
1940.02	-7.58022e-06	6.77986e-07	-1.70083e-11	1.52031e-30	-2.45306e-08	-2.53999e-06	4.00685e-34	3.24252e-06	2.27036e-41	4.52666e-102
1940.66	-6.0947e-06	-1.83035e-06	-5.11615e-12	1.83288e-31	-5.19006e-08	-4.75885e-06	7.51483e-33	2.98041e-06	4.59067e-43	1.00358e-103
1941.3	-1.41594e-05	-5.9118e-06	-1.47679e-12	2.12999e-32	-1.05947e-07	-8.449e-06	1.32249e-31	2.64314e-06	8.48482e-45	2.15408e-105
1941.94	-3.07482e-05	-1.21618e-05	-4.09065e-13	2.38595e-33	-2.08668e-07	-1.42148e-05	2.18387e-30	2.2616e-06	1.43349e-46	4.47622e-107
1942.59	-5.01339e-05	-2.11919e-05	-1.08732e-13	2.57623e-34	-3.96528e-07	-2.26625e-05	3.3839e-29	1.86707e-06	2.21377e-48	9.00533e-109
1943.23	-6.83288e-05	-3.34776e-05	-2.77346e-14	2.68133e-35	-7.27015e-07	-3.4238e-05	4.92001e-28	1.48717e-06	3.12505e-50	1.75399e-110
1943.87	-8.51972e-05	-4.91589e-05	-6.78858e-15	2.69003e-36	-1.28607e-06	-4.90164e-05	6.71231e-27	1.1429e-06	4.03243e-52	3.30743e-112
1944.52	-0.00010298	-6.78435e-05	-1.59453e-15	2.60223e-37	-2.19501e-06	-6.64976e-05	8.59284e-26	8.47443e-07	4.75622e-54	6.038e-114
1945.16	-0.00012257	-8.84917e-05	-3.59401e-16	2.46811e-38	-3.6146e-06	-8.54877e-05	1.03219e-24	6.06266e-07	5.12795e-56	1.06717e-115
1945.8	-0.000140642	-0.000109458	-7.7736e-17	4.28224e-39	-5.74296e-06	-0.000104144	1.16343e-23	4.18474e-07	5.05372e-58	1.82606e-117
1946.44	-0.000151995	-0.000128726	-1.61347e-17	1.02613e-38	-8.80364e-06	-0.000120225	1.23049e-22	2.78698e-07	4.55265e-60	3.02505e-119
1947.09	-0.000153571	-0.000144306	-3.21361e-18	4.75125e-38	-1.30209e-05	-0.00013152	1.22117e-21	1.79095e-07	3.7489e-62	4.85164e-121
1947.73	-0.000147289	-0.00015469	-6.14217e-19	2.20548e-37	-1.8581e-05	-0.000136338	1.13718e-20	1.1108e-07	2.82181e-64	7.53325e-123
1948.37	-0.000139057	-0.000159202	-1.12654e-19	1.00845e-36	-2.55829e-05	-0.00013393	9.93669e-20	6.65715e-08	1.94151e-66	1.13244e-124
1949.02	-0.000134109	-0.000158135	-1.98273e-20	4.54066e-36	-3.39846e-05	-0.000124672	8.14727e-19	3.87366e-08	1.22106e-68	1.64811e-126
1949.66	-0.00013242	-0.000152591	-3.34872e-21	2.01327e-35	-4.35578e-05	-0.000109975	6.26817e-18	2.23109e-08	7.01968e-71	2.32218e-128
1950.3	-0.000128931	-0.0001441	-5.42735e-22	8.79018e-35	-5.38643e-05	-9.19285e-05	4.52509e-17	1.36323e-08	3.68881e-73	3.1677e-130
1950.94	-0.000118013	-0.000134129	-8.44096e-23	3.77928e-34	-6.42668e-05	-7.28182e-05	3.06529e-16	1.0536e-08	1.7719e-75	4.1834e-132
1951.59	-0.000100076	-0.000123667	-1.25977e-23	1.60006e-33	-7.39817e-05	-5.46593e-05	1.94838e-15	1.22158e-08	7.78e-78	5.34877e-134
1952.23	-8.26388e-05	-0.000113007	-1.80421e-24	6.67079e-33	-8.217e-05	-3.88801e-05	1.16208e-14	1.91024e-08	3.12252e-80	6.6209e-136
1952.87	-7.44803e-05	-0.000101772	-2.47957e-25	2.73863e-32	-8.8055e-05	-2.62085e-05	6.50359e-14	3.27439e-08	1.14556e-82	7.93447e-138
1953.52	-7.75438e-05	-8.91601e-05	-3.2701e-26	1.10715e-31	-9.10428e-05	-1.67439e-05	3.41531e-13	5.5612e-08	3.84162e-85	9.20571e-140
1954.16	-8.4321e-05	-7.42955e-05	-4.13848e-27	4.40749e-31	-9.08215e-05	-1.01421e-05	1.68292e-12	9.07256e-08	1.1776e-87	1.03403e-141
1954.8	-8.38394e-05	-5.65881e-05	-5.02593e-28	1.72779e-30	-8.74144e-05	-5.832e-06	7.78138e-12	1.40998e-07	3.29964e-90	1.12448e-143
1955.44	-6.90008e-05	-3.59944e-05	-5.85716e-29	6.66973e-30	-8.11762e-05	-3.19853e-06	3.37604e-11	2.08294e-07	8.45125e-93	1.18387e-145
1956.09	-4.08429e-05	-1.31311e-05	-6.55017e-30	2.53535e-29	-7.27321e-05	-1.70135e-06	1.37441e-10	2.92336e-07	1.97862e-95	1.2067e-147
1956.73	-5.30606e-06	1.07717e-05	-7.02932e-31	9.4904e-29	-6.28745e-05	-9.28878e-07	5.25028e-10	3.89727e-07	4.23437e-98	1.19077e-149
1957.37	3.13528e-05	3.40537e-05	-7.23885e-32	3.4982e-28	-5.24414e-05	-6.0437e-07	1.88194e-09	4.93511e-07	8.28325e-101	1.13762e-151
1958.02	6.3916e-05	5.48994e-05	-7.15354e-33	1.26976e-27	-4.22013e-05	-5.66202e-07	6.32979e-09	5.93587e-07	1.48115e-103	1.05222e-153
1958.66	8.69834e-05	7.16429e-05	-6.78415e-34	4.53849e-27	-3.27664e-05	-7.40043e-07	1.9977e-08	6.78147e-07	2.42093e-106	9.42219e-156
1959.3	9.60451e-05	8.30463e-05	-6.19116e-35	1.59741e-26	-2.45461e-05	-1.1134e-06	5.916e-08	7.3589e-07	3.61704e-109	8.16838e-158
1959.94	9.18513e-05	8.84999e-05	-6.10309e-36	5.53652e-26	-1.77414e-05	-1.71631e-06	1.64393e-07	7.58495e-07	4.93979e-112	6.8558e-160
1960.59	8.18242e-05	8.81196e-05	-3.23731e-36	1.88961e-25	-1.23722e-05	-2.60756e-06	4.28646e-07	7.42579e-07	6.16666e-115	5.57082e-162
1961.23	7.46675e-05	8.27413e-05	-1.07933e-35	6.3507e-25	-8.32456e-06	-3.86415e-06	1.04875e-06	6.90531e-07	7.03683e-118	4.38247e-164
1961.87	7.17609e-05	7.38436e-05	-4.10273e-35	2.10178e-24	-5.40437e-06	-5.571e-06	2.4077e-06	6.09922e-07	7.33991e-121	3.33777e-166
1962.51	6.85868e-05	6.34412e-05	-1.54517e-34	6.84962e-24	-3.38569e-06	-7.80919e-06	5.1867e-06	5.117e-07	6.99825e-124	2.46111e-168
1963.16	6.24645e-05	5.39806e-05	-5.74764e-34	2.19817e-23	-2.04766e-06	-1.06417e-05	1.04843e-05	4.07762e-07	6.09922e-127	1.7569e-170
1963.8	5.7031e-05	4.82285e-05	-2.11146e-33	6.94658e-23	-1.19756e-06	-1.40973e-05	1.98858e-05	3.08638e-07	4.85898e-130	1.21422e-172
1964.44	5.8885e-05	4.90931e-05	-7.66048e-33	2.1617e-22	-6.81549e-07	-1.81541e-05	3.53921e-05	2.21892e-07	3.53836e-133	8.12436e-175
1965.09	7.08142e-05	5.92829e-05	-2.74479e-32	6.62422e-22	-3.86207e-07	-2.27263e-05	5.91055e-05	1.51525e-07	2.35529e-136	5.26282e-177
1965.73	9.24174e-05	8.07344e-05	-9.71273e-32	1.99889e-21	-2.34818e-07	-2.76566e-05	9.26209e-05	9.82826e-08	1.43309e-139	3.30054e-179
1966.37	0.000123405	0.000113852	-3.39433e-31	5.93961e-21	-1.81499e-07	-3.27176e-05	0.000136192	6.05508e-08	7.97051e-143	2.00397e-181
1967.01	0.0001649	0.000156769	-1.17151e-30	1.73797e-20	-2.05515e-07	-3.76253e-05	0.000187912	3.54335e-08	4.05216e-146	1.17797e-183
1967.66	0.000216139	0.000204988	-3.99317e-30	5.00774e-20	-3.06923e-07	-4.20623e-05	0.00024329	1.96951e-08	1.88309e-149	6.70375e-186
1968.3	0.000269773	0.000251737	-1.34422e-29	1.42087e-19	-5.03739e-07	-4.5711e-05	0.000295577	1.03981e-08	7.99914e-153	3.6935e-188
1968.94	0.000312135	0.000289196	-4.46891e-29	3.96994e-19	-8.30078e-07	-4.82906e-05	0.000336986	5.21431e-09	3.10599e-156	1.97014e-190
1969.59	0.000331272	0.000310358	-1.46728e-28	1.09226e-18	-1.33417e-06	-4.95929e-05	0.000360569	2.48366e-09	1.10241e-159	1.01741e-192
1970.23	0.000324458	0.000310935	-4.75779e-28	2.95928e-18	-2.07496e-06	-4.95098e-05	0.00036215	1.12367e-09	3.57662e-163	5.08663e-195
1970.87	0.000296677	0.000290614	-1.52362e-27	7.89514e-18	-3.11594e-06	-4.80483e-05	0.000341594	4.82873e-10	1.06069e-166	2.46209e-197
1971.51	0.000252221	0.000253148	-4.81867e-27	2.07419e-17	-4.51549e-06	-4.53293e-05	0.000302905	1.97097e-10	2.87534e-170	1.15376e-199
1972.16	0.00019404	0.00020527	-1.50508e-26	5.36601e-17	-6.31387e-06	-4.15714e-05	0.000253115	7.64144e-11	7.12484e-174	5.2344e-202
1972.8	0.000130477	0.000154869	-4.64268e-26	1.36701e-16	-8.5181e-06	-3.70616e-05	0.000200431	2.81399e-11	1.61379e-177	2.29909e-204
1973.44	7.6326e-05	0.000109136	-1.41436e-25	3.42928e-16	-1.10877e-05	-3.21195e-05	0.000152336	9.84282e-12	3.34122e-181	9.7765e-207
1974.09	4.39377e-05	7.32869e-05	-4.2553e-25	8.47132e-16	-1.3925e-05	-2.70601e-05	0.000114269	3.27014e-12	6.32339e-185	4.02484e-209
1974.73	3.46345e-05	5.01103e-05	-1.26439e-24	2.0607e-15	-1.68732e-05	-2.21617e-05	8.91441e-05	1.03196e-12	1.0939e-188	1.60418e-211
1975.37	4.07914e-05	4.02362e-05	-3.71031e-24	4.93619e-15	-1.97267e-05	-1.76438e-05	7.76062e-05	3.09324e-13	1.7298e-192	6.19006e-214
1976.01	5.43807e-05	4.27642e-05	-1.07528e-23	1.16435e-14	-2.22515e-05	-1.36551e-05	7.86707e-05	8.80667e-14	2.50033e-196	2.31247e-216
1976.66	7.14465e-05	5.58927e-05	-3.07758e-23	2.70453e-14	-2.42168e-05	-1.02734e-05	9.03829e-05	2.38155e-14	3.30358e-200	8.36362e-219
1977.3	9.18215e-05	7.73323e-05	-8.69921e-23	6.18607e-14	-2.54288e-05	-7.51358e-06	0.000110275	6.1173e-15	3.98986e-204	2.92854e-221
1977.94	0.000115785	0.00010448	-2.42845e-22	1.39333e-13	-2.57624e-05	-5.34188e-06	0.000135584	1.49248e-15	4.4047e-208	9.92766e-224
1978.59	0.000141337	0.00013446	-6.69512e-22	3.09033e-13	-2.51825e-05	-3.69196e-06	0.000163335	3.45867e-16	4.44489e-212	3.25822e-226
1979.23	0.000166679	0.000164185	-1.82292e-21	6.74951e-13	-2.37499e-05	-2.48047e-06	0.000190415	7.61307e-17	4.10008e-216	1.03527e-228
1979.87	0.000191314	0.000190525	-4.90181e-21	1.45162e-12	-2.16111e-05	-1.62004e-06	0.000213757	1.5917e-17	3.45707e-220	3.18466e-231
1980.51	0.00021385	0.000210626	-1.30174e-20	3.07434e-12	-1.89733e-05	-1.02856e-06	0.000230628	3.1609e-18	2.66447e-224	9.48444e-234
1981.16	0.000229149	0.000222282	-3.41408e-20	6.41155e-12	-1.60716e-05	-6.34822e-07	0.000238989	5.96228e-19	1.87716e-228	2.73463e-236
1981.8	0.000232167	0.000224282	-8.84304e-20	1.31671e-11	-1.3135e-05	-3.8088e-07	0.000237798	1.06823e-19	1.20895e-232	7.63351e-239
1982.44	0.000221202	0.000216599	-2.26209e-19	2.66276e-11	-1.03574e-05	-2.22146e-07	0.000227179	1.81788e-20	7.12282e-237	2.06295e-241
1983.08	0.000198977	0.000200367	-5.71476e-19	5.3026e-11	-7.87989e-06	-1.25951e-07	0.000208373	2.93845e-21	3.8803e-241	5.39747e-244
1983.73	0.000169194	0.000177643	-1.42582e-18	1.03982e-10	-5.7842e-06	-6.94197e-08	0.000183496	4.51151e-22	2.32219e-245	1.36719e-246
1984.37	0.000136912	0.000151006	-3.51329e-18	2.00792e-10	-4.09654e-06	-3.71943e-08	0.00015514	6.57922e-23	6.09259e-249	3.35281e-249
1985.01	0.000108202	0.000123111	-8.5495e-18	3.81811e-10	-2.79926e-06	-1.93725e-08	0.000125929	9.11335e-24	9.12464e-252	7.96024e-252
1985.66	8.6175e-05	9.62843e-05	-2.0547e-17	7.14931e-10	-1.84552e-06	-9.80865e-09	9.81389e-05	1.19904e-24	1.89404e-254	1.82971e-254
1986.3	6.83494e-05	7.22509e-05	-4.87681e-17	1.31824e-09	-1.17395e-06	-4.82778e-09	7.34284e-05	1.49843e-25	4.10646e-257	4.07169e-257
1986.94	4.99674e-05	5.20264e-05	-1.14315e-16	2.39354e-09	-7.20489e-07	-2.30994e-09	5.27468e-05	1.77865e-26	8.79009e-260	8.77216e-260
1987.58	2.96612e-05	3.59544e-05	-2.64636e-16	4.27959e-09	-4.26637e-07	-1.0744e-09	3.63779e-05	2.00537e-27	1.83057e-262	1.82969e-262
1988.23	1.03395e-05	2.38506e-05	-6.05029e-16	7.53491e-09	-2.43748e-07	-4.85792e-10	2.40873e-05	2.14759e-28	3.69517e-265	3.69475e-265
1988.87	-4.13528e-06	1.5191e-05	-1.3661e-15	1.30638e-08	-1.34362e-07	-2.13524e-10	1.53125e-05	2.18452e-29	7.22343e-268	7.22324e-268
1989.51	-1.14505e-05	9.29653e-06	-3.04627e-15	2.23036e-08	-7.14595e-08	-9.12344e-11	9.34577e-06	2.11063e-30	1.36716e-270	1.36715e-270
1990.16	-1.1551e-05	5.47716e-06	-6.70865e-15	3.74969e-08	-3.66688e-08	-3.78953e-11	5.47637e-06	1.93695e-31	2.5052e-273	2.50519e-273
1990.8	-7.01196e-06	3.12482e-06	-1.45909e-14	6.2077e-08	-1.81545e-08	-1.53012e-11	3.08091e-06	1.6884e-32	4.4443e-276	4.44429e-276
1991.44	-2.6287e-06	1.75661e-06	-3.13406e-14	1.012e-07	-8.67209e-09	-6.00594e-12	1.66408e-06	1.39792e-33	7.63314e-279	7.63314e-279
1992.08	-1.72889e-06	1.0214e-06	-6.64833e-14	1.6246e-07	-3.99682e-09	-2.29167e-12	8.6294e-07	1.09936e-34	1.26923e-281	1.26923e-281
1992.73	-3.16616e-06	6.8467e-07	-1.39283e-13	2.56819e-07	-1.77728e-09	-8.50034e-13	4.2963e-07	8.21197e-36	2.04323e-284	2.04323e-284
1993.37	-2.82887e-06	6.04378e-07	-2.88179e-13	3.99781e-07	-7.62518e-10	-3.06504e-13	2.05361e-07	5.82647e-37	3.18444e-287	3.18444e-287
1994.01	6.60235e-07	7.06745e-07	-5.88855e-13	6.12818e-07	-3.15642e-10	-1.07436e-13	9.42432e-08	3.92657e-38	4.80493e-290	4.80493e-290
1994.66	4.696e-06	9.66428e-07	-1.18832e-12	9.25032e-07	-1.26064e-10	-3.66083e-14	4.15233e-08	2.51346e-39	7.01905e-293	7.01905e-293
1995.3	6.87441e-06	1.39249e-06	-2.36831e-12	1.37498e-06	-4.85779e-11	-1.21261e-14	1.75648e-08	1.5282e-40	9.92678e-296	9.92678e-296
1995.94	8.42729e-06	2.01968e-06	-4.66147e-12	2.01257e-06	-1.80608e-11	-3.90464e-15	7.13348e-09	8.82553e-42	1.35918e-298	1.35918e-298
1996.58	1.25273e-05	2.90358e-06	-9.06122e-12	2.90082e-06	-6.4787e-12	-1.22223e-15	2.78144e-09	4.84117e-43	1.8017e-301	1.8017e-301
1997.23	1.90464e-05	4.11825e-06	-1.73953e-11	4.11723e-06	-2.24228e-12	-3.71913e-16	1.04123e-09	2.52238e-44	2.31222e-304	2.31222e-304
1997.87	2.56513e-05	5.7548e-06	-3.29803e-11	5.75446e-06	-7.48759e-13	-1.10013e-16	3.74227e-10	1.24831e-45	2.87284e-307	2.87284e-307
1998.51	3.1342e-05	7.91995e-06	-6.17532e-11	7.91988e-06	-2.41239e-13	-3.16345e-17	1.29131e-10	5.86789e-47	--	--
1999.16	3.78235e-05	1.07336e-05	-1.14194e-10	1.07337e-05	-7.49899e-14	-8.84284e-18	4.27796e-11	2.61995e-48	--	--
1999.8	4.74448e-05	1.43247e-05	-2.08548e-10	1.43249e-05	-2.2491e-14	-2.40291e-18	1.36066e-11	1.1111e-49	--	--
2000.44	6.0577e-05	1.88253e-05	-3.7614e-10	1.88257e-05	-6.50831e-15	-6.34745e-19	4.15503e-12	4.47576e-51	--	--
2001.08	7.32995e-05	2.4362e-05	-6.69997e-10	2.43627e-05	-1.8171e-15	-1.62995e-19	1.21817e-12	1.71249e-52	--	--
2001.73	7.96094e-05	3.10454e-05	-1.17863e-09	3.10466e-05	-4.89485e-16	-4.06878e-20	3.42885e-13	6.2236e-54	0	0
2002.37	7.58915e-05	3.89578e-05	-2.04767e-09	3.89599e-05	-1.27219e-16	-9.87347e-21	9.26616e-14	2.14835e-55	0	0
2003.01	6.60706e-05	4.81398e-05	-3.51335e-09	4.81433e-05	-3.19019e-17	-2.32911e-21	2.40414e-14	7.04397e-57	0	0
2003.65	6.05423e-05	5.85768e-05	-5.95339e-09	5.85827e-05	-7.71847e-18	-5.34101e-22	5.98865e-15	2.19372e-58	0	0
2004.3	6.84768e-05	7.01869e-05	-9.96292e-09	7.01969e-05	-1.80176e-18	-1.19062e-22	1.43221e-15	6.48926e-60	0	0
2004.94	8.99654e-05	8.28123e-05	-1.6466e-08	8.28288e-05	-4.05804e-19	-2.5801e-23	3.28847e-16	1.82331e-61	0	0
2005.58	0.000117086	9.6214e-05	-2.68764e-08	9.62409e-05	-8.81832e-20	-5.43518e-24	7.24921e-17	4.86602e-63	0	0
2006.23	0.000141158	0.000110073	-4.33244e-08	0.000110117	-1.84887e-20	-1.11303e-24	1.53425e-17	1.2335e-64	0	0
2006.87	0.000158029	0.000123999	-6.89723e-08	0.000124068	-3.74006e-21	-2.21572e-25	3.11753e-18	2.96999e-66	0	0
2007.51	0.000166599	0.000137544	-1.08442e-07	0.000137652	-7.29966e-22	-4.28782e-26	6.08184e-19	6.79236e-68	0	0
2008.15	0.000167946	0.000150222	-1.68383e-07	0.000150391	-1.3746e-22	-8.06628e-27	1.13912e-19	1.47549e-69	0	0
2008.8	0.000166136	0.00016154	-2.58213e-07	0.000161798	-2.49749e-23	-1.47511e-27	2.04838e-20	3.04441e-71	0	0
2009.44	0.00016607	0.000171021	-3.91057e-07	0.000171412	-4.37806e-24	-2.62235e-28	3.5364e-21	5.9665e-73	0	0
2010.08	0.000169866	0.000178238	-5.84898e-07	0.000178823	-7.40476e-25	-4.53181e-29	5.86167e-22	1.11067e-74	0	0
2010.73	0.000175149	0.000182841	-8.63975e-07	0.000183705	-1.20835e-25	-7.6132e-30	9.32805e-23	1.96383e-76	0	0
2011.37	0.000178595	0.000184577	-1.26038e-06	0.000185838	-1.90249e-26	-1.2433e-30	1.42518e-23	3.29816e-78	0	0
2012.01	0.000179129	0.000183307	-1.81586e-06	0.000185123	-2.89006e-27	-1.9738e-31	2.09053e-24	5.26127e-80	0	0
2012.65	0.000177953	0.000179011	-2.5837e-06	0.000181595	-4.23585e-28	-3.04608e-32	2.94411e-25	7.97185e-82	0	0
2013.3	0.000175724	0.000171782	-3.63063e-06	0.000175412	-5.99e-29	-4.56979e-33	3.9807e-26	1.1473e-83	0	0
2013.94	0.000170868	0.000161814	-5.03851e-06	0.000166852	-8.17268e-30	-6.66446e-34	5.16743e-27	1.56837e-85	0	0
2014.58	0.000160341	0.00014938	-6.9056e-06	0.000156286	-1.07585e-30	-9.44819e-35	6.44019e-28	2.03642e-87	0	0
2015.23	0.000141708	0.000134805	-9.34719e-06	0.000144152	-1.36645e-31	-1.30211e-35	7.70605e-29	2.51152e-89	0	0
2015.87	0.000116934	0.000118434	-1.24951e-05	0.000130929	-1.6745e-32	-1.74445e-36	8.85267e-30	2.9421e-91	0	0
2016.51	9.07377e-05	0.000100607	-1.6496e-05	0.000117103	-1.97983e-33	-2.27189e-37	9.76395e-31	3.27362e-93	0	0
2017.15	6.54945e-05	8.16293e-05	-2.15079e-05	0.000103137	-2.25851e-34	-2.87627e-38	1.03392e-31	3.45978e-95	0	0
2017.8	4.0063e-05	6.17545e-05	-2.76947e-05	8.94492e-05	-2.48581e-35	-3.53986e-39	1.05113e-32	3.47312e-97	0	0
2018.44	1.2765e-05	4.1174e-05	-3.52189e-05	7.63929e-05	-2.63976e-36	-4.23504e-40	1.02597e-33	3.31163e-99	0	0
2019.08	-1.57637e-05	2.00139e-05	-4.42318e-05	6.42457e-05	-2.70466e-37	-4.92543e-41	9.61441e-35	2.99926e-101	0	0
2019.73	-4.42728e-05	-1.65739e-06	-5.48621e-05	5.32047e-05	-2.6737e-38	-5.56858e-42	8.65007e-36	2.5801e-103	0	0
2020.37	-7.33411e-05	-2.38152e-05	-6.72033e-05	4.33881e-05	-2.55014e-39	-6.12012e-43	7.47181e-37	2.10819e-105	0	0
2021.01	-0.000103052	-4.64573e-05	-8.12996e-05	3.48423e-05	-2.34675e-40	-6.53871e-44	6.19642e-38	1.63618e-107	0	0
2021.65	-0.000130881	-6.95806e-05	-9.71329e-05	2.75523e-05	-2.08363e-41	-6.79376e-45	4.93362e-39	1.20616e-109	0	0
2022.3	-0.000154608	-9.31556e-05	-0.00011461	2.14547e-05	-1.78495e-42	-7.16229e-46	3.77137e-40	8.44558e-112	0	0
2022.94	-0.000175462	-0.000117104	-0.000133555	1.64514e-05	-1.4753e-43	-3.98616e-46	2.76784e-41	5.61699e-114	0	0
2023.58	-0.000196828	-0.000141279	-0.000153702	1.24222e-05	-1.17649e-44	-3.48961e-45	1.95026e-42	3.54836e-116	0	0
2024.23	-0.000220548	-0.000165456	-0.000174693	9.23654e-06	-9.05209e-46	-3.5545e-44	1.31933e-43	2.12913e-118	0	0
2024.87	-0.000244989	-0.000189326	-0.000196089	6.76293e-06	-6.71985e-47	-3.52074e-43	8.56888e-45	1.21347e-120	0	0
2025.51	-0.000267911	-0.000212499	-0.000217375	4.87613e-06	-4.81307e-48	-3.38507e-42	5.34322e-46	6.56907e-123	0	0
2026.15	-0.000288098	-0.000234521	-0.000237983	3.46202e-06	-3.3261e-49	-3.15915e-41	3.19883e-47	3.37777e-125	0	0
2026.8	-0.000306086	-0.000254893	-0.000257313	2.42047e-06	-2.21769e-50	-2.86181e-40	1.83861e-48	1.6497e-127	0	0
2027.44	-0.000324402	-0.000273097	-0.000274763	1.66642e-06	-1.42665e-51	-2.51642e-39	1.01475e-49	7.65301e-130	0	0
2028.08	-0.000346769	-0.000288628	-0.000289757	1.12976e-06	-8.8549e-53	-2.1478e-38	5.67633e-51	3.37217e-132	0	0
2028.72	-0.00037272	-0.000301026	-0.00030178	7.54223e-07	-5.30277e-54	-1.7794e-37	6.14142e-51	1.41136e-134	0	0
2029.37	-0.00039398	-0.000309907	-0.000310403	4.95829e-07	-3.06389e-55	-1.43094e-36	1.09869e-49	5.61067e-137	0	0
2030.01	-0.000401596	-0.000314992	-0.000315313	3.20987e-07	-1.70803e-56	-1.11697e-35	1.97452e-48	2.11857e-139	0	0
2030.65	-0.000392886	-0.000316123	-0.000316327	2.0464e-07	-9.18688e-58	-8.4631e-35	3.40731e-47	7.59838e-142	0	0
2031.3	-0.000372384	-0.000313281	-0.000313409	1.28513e-07	-4.76752e-59	-6.22425e-34	5.64508e-46	2.58851e-144	0	0
2031.94	-0.000345239	-0.000306587	-0.000306667	7.9574e-08	-2.38709e-60	-4.44339e-33	8.97921e-45	8.37584e-147	0	0
2032.58	-0.000314386	-0.000296299	-0.000296348	4.87616e-08	-1.15318e-61	-3.07901e-32	1.37124e-43	2.57429e-149	0	0
2033.22	-0.00028149	-0.000282794	-0.000282824	2.99901e-08	-5.37494e-63	-2.07098e-31	2.01049e-42	7.51515e-152	0	0
2033.87	-0.000248998	-0.00026655	-0.00026657	1.94397e-08	-2.41715e-64	-1.35211e-30	2.83006e-41	2.08386e-154	0	0
2034.51	-0.000218454	-0.000248118	-0.000248134	1.51486e-08	-1.04878e-65	-8.56873e-30	3.82473e-40	5.48843e-157	0	0
2035.15	-0.00018975	-0.000228091	-0.000228108	1.69519e-08	-4.39054e-67	-5.27097e-29	4.96265e-39	1.37303e-159	0	0
2035.8	-0.000160214	-0.00020707	-0.000207097	2.68597e-08	-1.77338e-68	-3.14727e-28	6.18211e-38	3.26257e-162	0	0
2036.44	-0.000127407	-0.00018564	-0.00018569	5.00323e-08	-6.91094e-70	-1.82409e-27	7.39381e-37	7.36363e-165	0	0
2037.08	-9.23415e-05	-0.000164333	-0.00016443	9.65942e-08	-2.59851e-71	-1.02619e-26	8.49003e-36	1.57861e-167	0	0
2037.72	-6.07807e-05	-0.000143614	-0.000143799	1.84599e-07	-9.42676e-73	-5.60379e-26	9.35964e-35	3.21444e-170	0	0
2038.37	-3.64746e-05	-0.000123852	-0.000124196	3.44505e-07	-3.29953e-74	-2.97032e-25	9.90645e-34	6.21711e-173	0	0
2039.01	-1.80588e-05	-0.00010531	-0.000105935	6.25467e-07	-1.11428e-75	-1.52825e-24	1.00667e-32	1.14215e-175	0	0
2039.65	-3.16291e-06	-8.81353e-05	-8.92389e-05	1.10357e-06	-3.63066e-77	-7.63227e-24	9.82118e-32	1.99299e-178	0	0
2040.3	7.75246e-06	-7.23498e-05	-7.42415e-05	1.89171e-06	-1.14138e-78	-3.69984e-23	9.1992e-31	3.30323e-181	0	0
2040.94	1.3653e-05	-5.78484e-05	-6.09985e-05	3.15015e-06	-3.46197e-80	-1.74093e-22	8.27266e-30	5.20023e-184	0	0
2041.58	1.79673e-05	-4.44003e-05	-4.94962e-05	5.09592e-06	-1.01314e-81	-7.95152e-22	7.1425e-29	7.77601e-187	0	0
2042.22	2.55697e-05	-3.16567e-05	-3.96647e-05	8.00798e-06	-2.86067e-83	-3.52523e-21	5.92057e-28	1.10444e-189	0	0
2042.87	3.65959e-05	-1.91673e-05	-3.13918e-05	1.22245e-05	-7.79322e-85	-1.51703e-20	4.7118e-27	1.48997e-192	0	0
2043.51	4.78252e-05	-6.40821e-06	-2.45363e-05	1.8128e-05	-2.04841e-86	-6.33683e-20	3.60013e-26	1.90925e-195	0	0
2044.15	5.79147e-05	7.17427e-06	-1.894e-05	2.61143e-05	-5.19481e-88	-2.56932e-19	2.64095e-25	2.32379e-198	0	0
2044.8	6.93622e-05	2.2105e-05	-1.44388e-05	3.65438e-05	-1.27108e-89	-1.01119e-18	1.85999e-24	2.68648e-201	0	0
2045.44	8.43416e-05	3.88064e-05	-1.08709e-05	4.96773e-05	-3.00073e-91	-3.86294e-18	1.25768e-23	2.94999e-204	0	0
2046.08	0.000102505	5.7518e-05	-8.08312e-06	6.56011e-05	-6.83492e-93	-1.43243e-17	8.16465e-23	3.07685e-207	0	0
2046.72	0.000122342	7.82177e-05	-5.93589e-06	8.41536e-05	-1.50207e-94	-5.1558e-17	5.0888e-22	3.0482e-210	0	0
2047.37	0.00014293	0.000100563	-4.30548e-06	0.000104868	-3.18493e-96	-1.80131e-16	3.0451e-21	2.86834e-213	0	0
2048.01	0.000162981	0.000123861	-3.08558e-06	0.000126947	-6.51568e-98	-6.10874e-16	1.74944e-20	2.56371e-216	0	0
2048.65	0.000179314	0.000147095	-2.18776e-06	0.000149283	-1.28609e-99	-2.01087e-15	9.64945e-20	2.17649e-219	0	0
2049.29	0.000189649	0.00016899	-1.542e-06	0.000170532	-2.44926e-101	-6.42517e-15	5.10995e-19	1.75508e-222	0	0
2049.94	0.00019572	0.000188141	-1.09827e-06	0.000189239	-4.50037e-103	-1.99276e-14	2.59801e-18	1.34426e-225	0	0
2050.58	0.000201483	0.000203167	-8.30911e-07	0.000203998	-7.97837e-105	-5.99923e-14	1.26815e-17	9.77967e-229	0	0
2051.22	0.000207849	0.000212875	-7.48064e-07	0.000213623	-1.36468e-106	-1.75309e-13	5.94311e-17	6.75793e-232	0	0
2051.87	0.000210013	0.0002164	-9.093e-07	0.000217309	-2.25216e-108	-4.97261e-13	2.67402e-16	4.43561e-235	0	0
2052.51	0.000202786	0.000213288	-1.4542e-06	0.000214743	-3.58608e-110	-1.36909e-12	1.15511e-15	2.76531e-238	0	0
2053.15	0.000185558	0.000203499	-2.6434e-06	0.000206142	-5.50923e-112	-3.6589e-12	4.79063e-15	1.63751e-241	0	0
2053.79	0.000163003	0.000187322	-4.90919e-06	0.000192231	-8.16607e-114	-9.49156e-12	1.90753e-14	9.21034e-245	0	0
2054.44	0.000140045	0.000165231	-8.90535e-06	0.000174136	-1.16785e-115	-2.38998e-11	7.29218e-14	4.92059e-248	0	0
2055.08	0.000117567	0.000137701	-1.55358e-05	0.000153237	-1.61143e-117	-5.84145e-11	2.67642e-13	2.49694e-251	0	0
2055.72	9.3141e-05	0.000105061	-2.59315e-05	0.000130993	-2.1453e-119	-1.38585e-10	9.43103e-13	1.20351e-254	0	0
2056.37	6.46594e-05	6.74345e-05	-4.13426e-05	0.000108777	-2.75561e-121	-3.1914e-10	3.19061e-12	5.50989e-258	0	0
2057.01	3.27022e-05	2.48271e-05	-6.29205e-05	8.77483e-05	-3.41504e-123	-7.13371e-10	1.03633e-11	2.39599e-261	0	0
2057.65	-1.64365e-06	-2.26351e-05	-9.13955e-05	6.87619e-05	-4.08345e-125	-1.54781e-09	3.23169e-11	9.89644e-265	0	0
2058.29	-4.13368e-05	-7.43554e-05	-0.000126696	5.23438e-05	-4.71096e-127	-3.25981e-09	9.67545e-11	3.8826e-268	0	0
2058.94	-9.25173e-05	-0.000128908	-0.000167609	3.87072e-05	-5.24376e-129	-6.664e-09	2.78114e-10	1.44683e-271	0	0
2059.58	-0.000157846	-0.000183809	-0.000211602	2.78053e-05	-5.63155e-131	-1.32235e-08	7.67507e-10	5.12108e-275	0	0
2060.22	-0.000231013	-0.000235556	-0.000254936	1.94031e-05	-5.83531e-133	-2.547e-08	2.03354e-09	1.72171e-278	0	0
2060.87	-0.000299919	-0.000279999	-0.00029311	1.31529e-05	-5.8338e-135	-4.76189e-08	5.17286e-09	5.49814e-282	0	0
2061.51	-0.000355633	-0.000313013	-0.000321601	8.66132e-06	-5.62718e-137	-8.6417e-08	1.26334e-08	1.66784e-285	0	0
2062.15	-0.000395113	-0.000331319	-0.000336737	5.54056e-06	-5.23698e-139	-1.52226e-07	2.96221e-08	4.80681e-289	0	0
2062.79	-0.000414868	-0.000333225	-0.000336475	3.44296e-06	-4.70243e-141	-2.60284e-07	6.66844e-08	1.31718e-292	0	0
2063.44	-0.000406745	-0.000319058	-0.000320849	2.07835e-06	-4.07395e-143	-4.31993e-07	1.44126e-07	3.44143e-296	0	0
2064.08	-0.000365214	-0.000291147	-0.000291968	1.21875e-06	-3.40534e-145	-6.95946e-07	2.99069e-07	8.66629e-300	0	0
2064.72	-0.000297579	-0.000253345	-0.000253547	6.94255e-07	-2.74635e-147	-1.08829e-06	5.95816e-07	2.18894e-303	0	0
2065.37	-0.000222907	-0.000210248	-0.00021012	3.84178e-07	-2.13699e-149	-1.65189e-06	1.13964e-06	6.26966e-307	0	0
2066.01	-0.000158627	-0.000166309	-0.000166175	2.06516e-07	-1.60436e-151	-2.43383e-06	2.09286e-06	--	0	0
2066.65	-0.000109611	-0.000125098	-0.000125415	1.07841e-07	-1.16212e-153	-3.48075e-06	3.69006e-06	--	0	0
2067.29	-7.13156e-05	-8.88581e-05	-9.03275e-05	5.47045e-08	-8.12182e-156	-4.83202e-06	6.24676e-06	--	0	0
2067.94	-4.0522e-05	-5.84146e-05	-6.20838e-05	2.6957e-08	-5.47654e-158	-6.51123e-06	1.01535e-05	--	0	0
2068.58	-1.94309e-05	-3.3379e-05	-4.07215e-05	1.29041e-08	-3.56295e-160	-8.51696e-06	1.58465e-05	--	0	0
2069.22	-9.85989e-06	-1.25492e-05	-2.54892e-05	6.00057e-09	-2.23648e-162	-1.08145e-05	2.37485e-05	0	0	0
2069.86	-8.18054e-06	5.62594e-06	-1.52257e-05	2.7106e-09	-1.35448e-164	-1.33307e-05	3.41796e-05	0	0	0
2070.51	-8.40658e-06	2.26172e-05	-8.67926e-06	1.18946e-09	-7.91463e-167	-1.59538e-05	4.72491e-05	0	0	0
2071.15	-6.25084e-06	3.94906e-05	-4.72146e-06	5.07036e-10	-4.46211e-169	-1.85402e-05	6.27517e-05	0	0	0
2071.79	1.28819e-06	5.67214e-05	-2.45108e-06	2.09961e-10	-2.42718e-171	-2.09275e-05	8.00998e-05	0	0	0
2072.44	1.60382e-05	7.41586e-05	-1.2143e-06	8.44592e-11	-1.27384e-173	-2.29549e-05	9.83278e-05	0	0	0
2073.08	3.75389e-05	9.1131e-05	-5.74092e-07	3.30038e-11	-6.45026e-176	-2.44856e-05	0.000116191	0	0	0
2073.72	6.23348e-05	0.00010667	-2.59014e-07	1.25282e-11	-3.15132e-178	-2.54295e-05	0.000132358	0	0	0
2074.36	8.83255e-05	0.0001198	-1.1152e-07	4.61981e-12	-1.48545e-180	-2.5761e-05	0.000145672	0	0	0
2075.01	0.000113332	0.000129836	-4.58216e-08	1.65488e-12	-6.7558e-183	-2.55278e-05	0.00015541	0	0	0
2075.65	0.000133398	0.000136611	-1.79669e-08	5.75862e-13	-2.96446e-185	-2.48465e-05	0.000161475	0	0	0
2076.29	0.000145013	0.000140563	-6.72303e-09	1.94661e-13	-1.25507e-187	-2.38867e-05	0.000164456	0	0	0
2076.94	0.000150765	0.00014266	-2.40073e-09	6.39217e-14	-5.12671e-190	-2.28426e-05	0.000165505	0	0	0
2077.58	0.000158031	0.000144163	-8.18105e-10	2.03904e-14	-2.02051e-192	-2.18985e-05	0.000166062	0	0	0
2078.22	0.000170183	0.000146286	-2.66049e-10	6.31847e-15	-7.6831e-195	-2.11939e-05	0.000167481	0	0	0
2078.86	0.000182097	0.000149851	-8.25659e-11	1.90198e-15	-2.81879e-197	-2.07955e-05	0.000170646	0	0	0
2079.51	0.00018715	0.000155024	-2.44527e-11	5.56174e-16	-9.97792e-200	-2.06833e-05	0.000175708	0	0	0
2080.15	0.000185104	0.000161232	-6.91101e-12	1.57988e-16	-3.40776e-202	-2.07551e-05	0.000181987	0	0	0
2080.79	0.000180542	0.00016726	-1.86399e-12	4.35957e-17	-1.12292e-204	-2.08483e-05	0.000188109	0	0	0
2081.44	0.000177729	0.000171537	-4.79767e-13	1.16862e-17	-3.5701e-207	-2.07763e-05	0.000192313	0	0	0
2082.08	0.000177332	0.000172505	-1.17844e-13	3.04307e-18	-1.09512e-209	-2.03692e-05	0.000192875	0	0	0
2082.72	0.000176053	0.000168999	-2.76229e-14	7.69766e-19	-3.24114e-212	-1.95112e-05	0.00018851	0	0	0
2083.36	0.000167977	0.00016051	-6.179e-15	1.89154e-19	-9.25515e-215	-1.81641e-05	0.000178674	0	0	0
2084.01	0.000150381	0.000147296	-1.31903e-15	4.51522e-20	-2.54989e-217	-1.63723e-05	0.000163668	0	0	0
2084.65	0.000128114	0.000130307	-2.68707e-16	1.04701e-20	-6.77812e-220	-1.42499e-05	0.000144557	0	0	0
2085.29	0.000108971	0.000110965	-5.22384e-17	2.35849e-21	-1.7384e-222	-1.19545e-05	0.000122919	0	0	0
2085.94	9.40443e-05	9.08715e-05	-9.69143e-18	5.16088e-22	-4.3017e-225	-9.65435e-06	0.000100526	0	0	0
2086.58	7.74576e-05	7.15198e-05	-1.71583e-18	1.09704e-22	-1.02703e-227	-7.49935e-06	7.90192e-05	0	0	0
2087.22	5.62993e-05	5.4077e-05	-2.89899e-19	2.26532e-23	-2.36579e-230	-5.59997e-06	5.9677e-05	0	0	0
2087.86	3.57065e-05	3.92717e-05	-4.67419e-20	4.54409e-24	-5.25802e-233	-4.01827e-06	4.329e-05	0	0	0
2088.51	2.18393e-05	2.7388e-05	-7.19206e-21	8.85465e-25	-1.12751e-235	-2.76994e-06	3.0158e-05	0	0	0
2089.15	1.63673e-05	1.83406e-05	-1.05606e-21	1.67612e-25	-2.33274e-238	-1.834e-06	2.01746e-05	0	0	0
2089.79	1.84814e-05	1.17927e-05	-1.47984e-22	3.08211e-26	-4.65657e-241	-1.1662e-06	1.29589e-05	0	0	0
2090.43	2.64579e-05	7.28017e-06	-1.97895e-23	5.50552e-27	-8.96844e-244	-7.12116e-07	7.99228e-06	0	0	0
2091.08	3.64853e-05	4.31509e-06	-2.52555e-24	9.5534e-28	-1.66655e-246	-4.17549e-07	4.73264e-06	0	0	0
2091.72	4.1718e-05	2.45557e-06	-3.07616e-25	1.61037e-28	-2.98794e-249	-2.35085e-07	2.69065e-06	0	0	0
2092.36	3.72903e-05	1.3416e-06	-3.57656e-26	2.63696e-29	-5.16865e-252	-1.27083e-07	1.46869e-06	0	0	0
2093.01	2.48056e-05	7.03728e-07	-3.97134e-27	4.19458e-30	-8.62648e-255	-6.59613e-08	7.69689e-07	0	0	0
2093.65	1.1129e-05	3.54398e-07	-4.21736e-28	6.48161e-31	-1.38913e-257	-3.28715e-08	3.8727e-07	0	0	0
2094.29	2.64662e-06	1.7135e-07	-4.30167e-29	9.7294e-32	-2.15824e-260	-1.5728e-08	1.87078e-07	0	0	0
2094.93	2.52774e-06	7.95394e-08	-4.26951e-30	1.41872e-32	-3.23527e-263	-7.22522e-09	8.67646e-08	0	0	0
2095.58	9.01441e-06	3.54475e-08	-4.28374e-31	2.00964e-33	-4.67921e-266	-3.18673e-09	3.86343e-08	0	0	0
2096.22	1.64163e-05	1.51668e-08	-4.77783e-32	2.76533e-34	-6.52959e-269	-1.34945e-09	1.65163e-08	0	0	0
2096.86	1.65074e-05	6.23029e-09	-6.86845e-33	3.69645e-35	-8.79124e-272	-5.48633e-10	6.77893e-09	0	0	0
2097.51	4.13644e-06	2.45713e-09	-1.34575e-33	4.79988e-36	-1.142e-274	-2.14151e-10	2.67128e-09	0	0	0
2098.15	-1.86718e-05	9.30362e-10	-3.21214e-34	6.0546e-37	-1.43131e-277	-8.02551e-11	1.01062e-09	0	0	0
2098.79	-4.44117e-05	3.38206e-10	-8.25573e-35	7.41907e-38	-1.73082e-280	-2.88759e-11	3.67082e-10	0	0	0
2099.43	-6.62059e-05	1.18037e-10	-2.15483e-35	8.83124e-39	-2.0194e-283	-9.97496e-12	1.28011e-10	0	0	0

## Sheet: Fig.3B
time	Hred	Hred*	HoxH	Hox	Hhyd	Hred'	Hsred	Hsred*
0	0	0	0	0	0	0	0	0
22	0.01009	0.00906	-0.0061	-0.01355	0.0014	-0.00143	0.000674852	0.00013865
44	0.02903	0.02343	-0.01496	-0.04001	0.00472	-0.00382	0.00233	0.000760448
66	0.02515	0.02817	-0.01643	-0.04467	0.00703	-0.00481	0.00349	0.00111
88	0.01828	0.03169	-0.01691	-0.04468	0.00883	-0.00479	0.00393	0.000949026
110	0.01267	0.03443	-0.01688	-0.04504	0.01021	-0.0049	0.0039	0.0009312
132	0.00901	0.03722	-0.01735	-0.04574	0.01157	-0.00517	0.00409	0.00105
154	0.00561	0.03874	-0.01719	-0.04577	0.01305	-0.00499	0.00403	0.00102
176	0.00365	0.04036	-0.01743	-0.04604	0.01356	-0.00494	0.00423	0.00117
198	0.00207	0.04112	-0.01748	-0.04621	0.01414	-0.00503	0.00413	0.0011
220	0.000886817	0.04173	-0.01756	-0.0464	0.01452	-0.00493	0.00415	0.00124
242	0.000316176	0.04245	-0.01759	-0.04667	0.01487	-0.00476	0.0042	0.00123
264	-0.000101759	0.04238	-0.01768	-0.04687	0.01494	-0.00492	0.00417	0.00128
286	-0.000186797	0.0425	-0.01747	-0.04732	0.01486	-0.00509	0.00442	0.0014
308	0.000173342	0.04253	-0.01771	-0.04712	0.0152	-0.00511	0.00402	0.00145
330	0.000432638	0.04211	-0.01793	-0.04766	0.015	-0.00546	0.00409	0.00133
352	0.00136	0.04168	-0.01777	-0.04802	0.01483	-0.00527	0.00411	0.00158
374	0.00217	0.04116	-0.018	-0.04842	0.01504	-0.00532	0.00417	0.00142
396	0.01334	0.04003	-0.01809	-0.05042	0.01164	-0.00509	0.00297	0.00138
418	0.01994	0.03793	-0.01721	-0.05003	0.00772	-0.00482	0.0026	0.0013
440	0.02391	0.03499	-0.01716	-0.04941	0.00601	-0.00471	0.00258	0.00135
462	0.02592	0.03165	-0.01672	-0.04857	0.00441	-0.00515	0.00249	0.00133
484	0.02703	0.02859	-0.01624	-0.04759	0.00434	-0.00492	0.0024	0.00124
506	0.02789	0.02585	-0.01597	-0.04638	0.00438	-0.00477	0.00243	0.00111
528	0.02821	0.02368	-0.01535	-0.04503	0.00375	-0.00484	0.00248	0.00106
550	0.02793	0.02184	-0.0148	-0.04399	0.00386	-0.00469	0.0023	0.00103
572	0.02779	0.02027	-0.01446	-0.04294	0.00408	-0.00463	0.0024	0.00117
594	0.02712	0.0188	-0.01407	-0.04196	0.00334	-0.0046	0.00231	0.00111
616	0.02668	0.01758	-0.0138	-0.04081	0.0036	-0.00455	0.00225	0.00106
638	0.02589	0.01645	-0.01323	-0.03964	0.00357	-0.00426	0.00196	0.00113
660	0.02546	0.01596	-0.01306	-0.03916	0.00321	-0.0044	0.00203	0.00109
682	0.02451	0.01487	-0.01286	-0.03787	0.00326	-0.00436	0.00207	0.00108
704	0.02387	0.01375	-0.01238	-0.03703	0.00301	-0.00434	0.00183	0.000987263
726	0.02306	0.01327	-0.01208	-0.03613	0.00307	-0.0043	0.0019	0.000798167
748	0.02258	0.01261	-0.01192	-0.03538	0.00273	-0.0044	0.00159	0.000866603
770	0.0218	0.01183	-0.01157	-0.03449	0.00283	-0.00387	0.00174	0.00085059
792	0.02129	0.01141	-0.01115	-0.0338	0.00296	-0.00384	0.00157	0.000803863
814	0.02031	0.01061	-0.01103	-0.03312	0.0023	-0.00391	0.00172	0.00088771
836	0.01964	0.01028	-0.01084	-0.0324	0.00266	-0.00398	0.00156	0.00083675
858	0.01935	0.00993	-0.01041	-0.03205	0.00268	-0.00383	0.00153	0.00083147
880	0.01863	0.00908	-0.01051	-0.03126	0.00209	-0.00369	0.00151	0.000575024
902	0.018	0.00871	-0.01016	-0.03053	0.00254	-0.00367	0.00142	0.000771584
924	0.01738	0.00839	-0.00978	-0.02998	0.00259	-0.00359	0.00147	0.000807275
946	0.01675	0.00797	-0.00973	-0.02936	0.00261	-0.00389	0.00139	0.000655939
968	0.01623	0.00729	-0.00956	-0.0288	0.00237	-0.00346	0.00121	0.000679156
990	0.01571	0.0068	-0.00939	-0.02838	0.00247	-0.00372	0.00116	0.000533758
1012	0.01528	0.00667	-0.00919	-0.02786	0.00238	-0.00368	0.00129	0.000736256
1034	0.01477	0.00608	-0.00928	-0.02705	0.00204	-0.00365	0.0011	0.000643635
1056	0.01412	0.00565	-0.00887	-0.02644	0.00223	-0.00334	0.00111	0.000614312
1078	0.01388	0.00563	-0.0089	-0.02608	0.00202	-0.0034	0.00123	0.000768313
1100	0.01336	0.005	-0.0085	-0.02564	0.00218	-0.00322	0.00107	0.000705112
1122	0.01265	0.00444	-0.00848	-0.02511	0.00191	-0.00353	0.000910908	0.000498722
1144	0.01215	0.00423	-0.00815	-0.02459	0.00204	-0.00337	0.00118	0.000673862
1166	0.01196	0.00403	-0.00817	-0.02426	0.00237	-0.00323	0.00115	0.00058846
1188	0.01116	0.00336	-0.00797	-0.02364	0.00185	-0.0034	0.000823831	0.000428072
1210	0.01098	0.00337	-0.00763	-0.02305	0.00193	-0.00335	0.00102	0.000740481
1232	0.01006	0.00262	-0.00774	-0.02329	0.00166	-0.00349	0.000828205	0.000669429
1254	0.00978	0.00258	-0.00759	-0.02249	0.0018	-0.00328	0.000720628	0.000595058
1276	0.00951	0.00204	-0.00721	-0.02199	0.00186	-0.00296	0.00071544	0.000636514
1298	0.00906	0.00183	-0.00736	-0.02163	0.00158	-0.00314	0.000854496	0.0004851
1320	0.00849	0.00117	-0.00731	-0.02118	0.00167	-0.00286	0.000835731	0.000364553
1342	0.00798	0.0012	-0.00705	-0.02069	0.00175	-0.00306	0.00070844	0.000432712
1364	0.00769	0.000625708	-0.00714	-0.02047	0.00124	-0.00295	0.000886905	0.000457546
1386	0.00712	0.000516935	-0.00694	-0.01985	0.0017	-0.00315	0.000736129	0.000442469
1408	0.00696	0.000295433	-0.00669	-0.01983	0.00185	-0.00309	0.000763897	0.000524678
1430	0.00657	0.000240823	-0.00661	-0.01916	0.00172	-0.00282	0.000770911	0.000428831
1452	0.00614	-5.96852e-05	-0.00632	-0.01883	0.00146	-0.00288	0.000659467	0.000535293
1474	0.00579	-0.000532196	-0.00656	-0.01856	0.00176	-0.00284	0.00072401	0.000432039
1496	0.00493	-0.000662597	-0.00625	-0.01825	0.00202	-0.00293	0.000772868	0.000429355
1518	0.00495	-0.00104	-0.006	-0.0178	0.00151	-0.00265	0.000765091	0.000440268
1540	0.0046	-0.00125	-0.00593	-0.01772	0.00156	-0.00276	0.000766343	0.000523133
1562	0.00383	-0.00181	-0.00592	-0.01722	0.00167	-0.00287	0.000430124	0.000377209
1584	0.00358	-0.0017	-0.00581	-0.01681	0.00159	-0.00265	0.000591877	0.000433583
1606	0.00354	-0.00211	-0.00592	-0.01677	0.000931432	-0.00285	0.000626607	0.000441725
1628	0.00298	-0.00235	-0.00576	-0.01619	0.00184	-0.00248	0.000523682	0.000561456
1650	0.00259	-0.00244	-0.00538	-0.01601	0.00131	-0.00266	0.00050344	0.000535365
1672	0.00212	-0.00266	-0.00569	-0.01562	0.0013	-0.00274	0.000475388	0.000461704
1694	0.00169	-0.00314	-0.00533	-0.01523	0.00142	-0.00249	0.000436415	0.000465298
1716	0.00167	-0.00318	-0.00511	-0.01513	0.00127	-0.00268	0.000550412	0.000531858
1738	0.000869541	-0.00383	-0.00534	-0.01477	0.00182	-0.00267	0.000597343	0.000474902
1760	0.000744662	-0.0037	-0.0052	-0.01421	0.00136	-0.00258	0.000623181	0.000395837
1782	0.000421464	-0.00455	-0.00518	-0.01436	0.00104	-0.00254	0.00043537	0.000398257
1804	0.000209146	-0.0046	-0.00518	-0.01421	0.00128	-0.00251	0.000245805	0.00038304
1826	-0.000106073	-0.0047	-0.00498	-0.01403	0.00144	-0.00241	0.000392464	0.000313854
1848	-0.000530565	-0.00476	-0.00487	-0.01366	0.00161	-0.00244	0.000195333	0.000262828
1870	-0.000788593	-0.00523	-0.00495	-0.01389	0.00133	-0.00274	0.000234984	0.000180906
1892	-0.00107	-0.00517	-0.00481	-0.0132	0.00108	-0.00248	0.000371866	0.000425123
1914	-0.00146	-0.00539	-0.00477	-0.01304	0.000985546	-0.00228	0.000466669	0.000281517
1936	-0.00186	-0.00599	-0.00487	-0.01282	0.0012	-0.00239	0.000278405	0.000330019
1958	-0.00214	-0.00614	-0.00446	-0.01239	0.00151	-0.00232	0.000340893	0.000373085
1980	-0.00251	-0.0058	-0.00447	-0.01196	0.00117	-0.00237	0.00042114	0.000373777
2002	-0.00276	-0.00621	-0.00432	-0.01191	0.000805489	-0.00236	0.000303148	0.000524287
2024	-0.0031	-0.00669	-0.0044	-0.0116	0.000821932	-0.00217	0.000108518	0.000305803
2046	-0.00346	-0.00681	-0.00436	-0.01177	0.000675397	-0.00255	0.000322028	0.000283444
2068	-0.0037	-0.00681	-0.00411	-0.01165	0.00109	-0.00213	0.000268218	0.00022476
2090	-0.004	-0.00707	-0.0043	-0.01124	0.00131	-0.00224	0.000147133	0.000374225
2112	-0.00407	-0.0072	-0.00422	-0.01132	0.000989651	-0.00259	0.000332754	0.000322939
2134	-0.00433	-0.00725	-0.00416	-0.01094	0.00104	-0.00229	9.78704e-05	0.000284739
2156	-0.00441	-0.00744	-0.00414	-0.01121	0.00118	-0.00227	0.00020707	0.00038489
2178	-0.00486	-0.008	-0.00397	-0.01052	0.00107	-0.00225	0.000192664	0.000272232
2200	-0.00492	-0.00803	-0.00403	-0.01073	0.00106	-0.00226	0.000162441	0.000401503
2222	-0.00537	-0.00813	-0.00383	-0.01034	0.000988043	-0.00205	8.80901e-05	0.000248458
2244	-0.00614	-0.00856	-0.00363	-0.00997	0.00118	-0.00198	0.000118781	0.000327158
2266	-0.00636	-0.00884	-0.00357	-0.00981	0.00106	-0.00196	0.000105988	0.000349975

## Sheet: Fig.4
X	data	fit	Hred	HoxH	Hox	State 2	State 1	unassigned species
1740.1	-1.76713e-05	1.26392e-09	2.36797e-16	-1.52544e-76	-1.26321e-61	1.26392e-09	-1.91293e-80	-5.67103e-13
1740.74	-1.39122e-05	2.13846e-09	4.26842e-16	-7.81101e-75	-4.8763e-60	2.13846e-09	-1.42634e-79	-2.22459e-12
1741.39	-1.406e-05	3.5772e-09	7.64752e-16	-3.8169e-73	-1.78988e-58	3.57721e-09	-1.05129e-78	-8.3278e-12
1742.03	-2.09236e-05	5.91623e-09	1.36187e-15	-1.77994e-71	-6.24708e-57	5.9163e-09	-7.65946e-78	-2.9751e-11
1742.67	-3.33818e-05	9.6739e-09	2.41052e-15	-7.92122e-70	-2.07325e-55	9.67426e-09	-5.5163e-77	-1.0143e-10
1743.31	-4.75862e-05	1.56386e-08	4.2408e-15	-3.36411e-68	-6.54251e-54	1.56404e-08	-3.92711e-76	-3.30005e-10
1743.96	-5.90106e-05	2.49914e-08	7.41561e-15	-1.36345e-66	-1.96317e-52	2.5e-08	-2.76359e-75	-1.02463e-09
1744.6	-6.28122e-05	3.94713e-08	1.28886e-14	-5.27352e-65	-5.60134e-51	3.95088e-08	-1.92242e-74	-3.03602e-09
1745.24	-5.69234e-05	6.15774e-08	2.22653e-14	-1.9465e-63	-1.51966e-49	6.17319e-08	-1.3219e-73	-8.58489e-09
1745.89	-4.4671e-05	9.47663e-08	3.82307e-14	-6.85643e-62	-3.92031e-48	9.53649e-08	-8.98514e-73	-2.31663e-08
1746.53	-3.47422e-05	1.43481e-07	6.52465e-14	-2.3048e-60	-9.61643e-47	1.45656e-07	-6.03706e-72	-5.9658e-08
1747.17	-3.53328e-05	2.1254e-07	1.10679e-13	-7.39369e-59	-2.24299e-45	2.19954e-07	-4.0096e-71	-1.46613e-07
1747.81	-4.63272e-05	3.04682e-07	1.86608e-13	-2.2635e-57	-4.97464e-44	3.28396e-07	-2.6324e-70	-3.4385e-07
1748.46	-6.0327e-05	4.13603e-07	3.12723e-13	-6.61289e-56	-1.0491e-42	4.84759e-07	-1.70835e-69	-7.69586e-07
1749.1	-7.01686e-05	5.07164e-07	5.20896e-13	-1.84371e-54	-2.10373e-41	7.07482e-07	-1.09592e-68	-1.64375e-06
1749.74	-7.34601e-05	4.91772e-07	8.62388e-13	-4.90555e-53	-4.0113e-40	1.02086e-06	-6.94953e-68	-3.35048e-06
1750.39	-7.03955e-05	1.4528e-07	1.41911e-12	-1.24558e-51	-7.27276e-39	1.4564e-06	-4.35619e-67	-6.51733e-06
1751.03	-6.20251e-05	-9.9403e-07	2.32109e-12	-3.01821e-50	-1.25382e-37	2.05427e-06	-2.69919e-66	-1.20983e-05
1751.67	-5.26741e-05	-3.78446e-06	3.77336e-12	-6.97941e-49	-2.05536e-36	2.86482e-06	-1.65324e-65	-2.14323e-05
1752.31	-4.90964e-05	-9.65791e-06	6.09713e-12	-1.54021e-47	-3.20378e-35	3.95001e-06	-1.00095e-64	-3.62332e-05
1752.96	-5.54829e-05	-2.07436e-05	9.79231e-12	-3.24363e-46	-4.74851e-34	5.3847e-06	-5.9905e-64	-5.84568e-05
1753.6	-7.0027e-05	-3.98111e-05	1.56317e-11	-6.5189e-45	-6.69225e-33	7.2575e-06	-3.54397e-63	-9.00027e-05
1754.24	-9.01842e-05	-6.98814e-05	2.48021e-11	-1.25029e-43	-8.96824e-32	9.67108e-06	-2.07249e-62	-0.000132241
1754.89	-0.000118953	-0.000113406	3.9114e-11	-2.28842e-42	-1.14278e-30	1.27416e-05	-1.19804e-61	-0.000185426
1755.53	-0.000162977	-0.000171076	6.13108e-11	-3.99718e-41	-1.38464e-29	1.65973e-05	-6.84576e-61	-0.000248122
1756.17	-0.000225402	-0.000240582	9.55221e-11	-6.66291e-40	-1.59526e-28	2.13753e-05	-3.86678e-60	-0.000316849
1756.81	-0.000301182	-0.000315833	1.47922e-10	-1.0599e-38	-1.74762e-27	2.72175e-05	-2.159e-59	-0.000386128
1757.46	-0.000379024	-0.000387226	2.27678e-10	-1.60901e-37	-1.82046e-26	3.42648e-05	-1.1916e-58	-0.000449056
1758.1	-0.000444591	-0.000443221	3.48316e-10	-2.331e-36	-1.80317e-25	4.2649e-05	-6.50103e-58	-0.000498382
1758.74	-0.000483007	-0.000472991	5.29646e-10	-3.22269e-35	-1.69829e-24	5.24847e-05	-3.50598e-57	-0.000527856
1759.39	-0.000483015	-0.000469338	8.00497e-10	-4.25194e-34	-1.52093e-23	6.38584e-05	-1.86901e-56	-0.000533532
1760.03	-0.000441942	-0.000430784	1.20253e-09	-5.3536e-33	-1.29516e-22	7.68185e-05	-9.84897e-56	-0.000514632
1760.67	-0.00036704	-0.000362014	1.79553e-09	-6.43275e-32	-1.04872e-21	9.13642e-05	-5.13031e-55	-0.000473723
1761.31	-0.000272277	-0.00027249	2.66471e-09	-7.37631e-31	-8.07448e-21	0.000107436	-2.64163e-54	-0.000416144
1761.96	-0.000170647	-0.000173796	3.9307e-09	-8.07186e-30	-5.9114e-20	0.000124906	-1.34455e-53	-0.000348863
1762.6	-7.1606e-05	-7.6755e-05	5.76304e-09	-8.42945e-29	-4.11515e-19	0.000143575	-6.76479e-53	-0.000279098
1763.24	2.05482e-05	1.0692e-05	8.39836e-09	-8.40072e-28	-2.72397e-18	0.00016317	-3.3644e-52	-0.000213084
1763.88	0.000103349	8.43444e-05	1.21646e-08	-7.98961e-27	-1.7145e-17	0.000183342	-1.654e-51	-0.000155252
1764.53	0.00017737	0.000143381	1.75132e-08	-7.25147e-26	-1.02611e-16	0.000203678	-8.03786e-51	-0.000107948
1765.17	0.000245123	0.000189265	2.50606e-08	-6.28084e-25	-5.83941e-16	0.000223713	-3.86117e-50	-7.16282e-05
1765.81	0.000307266	0.00022449	3.56435e-08	-5.1916e-24	-3.15984e-15	0.00024294	-1.83347e-49	-4.5357e-05
1766.46	0.000359501	0.000251587	5.03884e-08	-4.09522e-23	-1.62585e-14	0.000260837	-8.60603e-49	-2.74092e-05
1767.1	0.000396865	0.000272568	7.08015e-08	-3.08279e-22	-7.95459e-14	0.000276886	-3.99307e-48	-1.58067e-05
1767.74	0.000420394	0.000288755	9.88816e-08	-2.21463e-21	-3.70061e-13	0.000290601	-1.83141e-47	-8.69912e-06
1768.38	0.000435807	0.000300876	1.37262e-07	-1.51828e-20	-1.63701e-12	0.000301546	-8.30311e-47	-4.5688e-06
1769.03	0.000446944	0.000309241	1.89385e-07	-9.9333e-20	-6.88567e-12	0.000309366	-3.72109e-46	-2.28992e-06
1769.67	0.000454156	0.000313946	2.59719e-07	-6.20193e-19	-2.75399e-11	0.000313801	-1.64845e-45	-1.0953e-06
1770.31	0.000454938	0.000315015	3.54016e-07	-3.69532e-18	-1.04737e-10	0.000314701	-7.21864e-45	-4.99957e-07
1770.96	0.00044731	0.000312502	4.79627e-07	-2.1012e-17	-3.78753e-10	0.000312036	-3.12471e-44	-2.17784e-07
1771.6	0.0004299	0.000306536	6.4587e-07	-1.14019e-16	-1.30236e-09	0.000305895	-1.33703e-43	-9.05338e-08
1772.24	0.000405234	0.000297344	8.64467e-07	-5.9044e-16	-4.25823e-09	0.000296485	-5.65517e-43	-3.5916e-08
1772.88	0.000379399	0.000285253	1.15004e-06	-2.91787e-15	-1.32387e-08	0.000284116	-2.36443e-42	-1.35974e-08
1773.53	0.000357075	0.000270667	1.52069e-06	-1.3761e-14	-3.91366e-08	0.000269185	-9.77195e-42	-4.91264e-09
1774.17	0.000337686	0.000254044	1.99861e-06	-6.19332e-14	-1.10012e-07	0.000252155	-3.9922e-41	-1.69382e-09
1774.81	0.00031853	0.000235849	2.61082e-06	-2.66005e-13	-2.94047e-07	0.000233533	-1.61219e-40	-5.57326e-10
1775.46	0.000297378	0.000216483	3.3899e-06	-1.0903e-12	-7.47333e-07	0.00021384	-6.43574e-40	-1.75002e-10
1776.1	0.000274684	0.000196163	4.37481e-06	-4.26477e-12	-1.80606e-06	0.000193595	-2.53953e-39	-5.24408e-11
1776.74	0.000250524	0.000174746	5.61168e-06	-1.59198e-11	-4.15019e-06	0.000173284	-9.9057e-39	-1.49964e-11
1777.38	0.000222982	0.000151438	7.15465e-06	-5.67112e-11	-9.06829e-06	0.000153352	-3.81937e-38	-4.09257e-12
1778.03	0.000188794	0.000124403	9.06661e-06	-1.92794e-10	-1.8841e-05	0.000134177	-1.4557e-37	-1.06585e-12
1778.67	0.000145354	9.02704e-05	1.14199e-05	-6.25473e-10	-3.7222e-05	0.000116073	-5.4844e-37	-2.64905e-13
1779.31	8.92867e-05	4.3649e-05	1.42969e-05	-1.93649e-09	-6.99226e-05	9.92766e-05	-2.04249e-36	-6.28309e-14
1779.96	1.4571e-05	-2.31627e-05	1.77903e-05	-5.72155e-09	-0.000124898	8.39507e-05	-7.51912e-36	-1.42216e-14
1780.6	-8.90148e-05	-0.00011996	2.20032e-05	-1.61326e-08	-0.000212135	7.01882e-05	-2.7362e-35	-3.07196e-15
1781.24	-0.000232408	-0.000257579	2.70489e-05	-4.34096e-08	-0.000342603	5.80184e-05	-9.8425e-35	-6.33249e-16
1781.88	-0.00042525	-0.000445769	3.30503e-05	-1.1147e-07	-0.000526124	4.74166e-05	-3.49975e-34	-1.24573e-16
1782.53	-0.000676109	-0.000690077	4.01386e-05	-2.73165e-07	-0.000768256	3.83139e-05	-1.23011e-33	-2.33866e-17
1783.17	-0.000990438	-0.000988282	4.84519e-05	-6.38824e-07	-0.0010667	3.06087e-05	-4.27392e-33	-4.18987e-18
1783.81	-0.00136021	-0.00132744	5.81327e-05	-1.4257e-06	-0.00140832	2.41766e-05	-1.46786e-32	-7.16351e-19
1784.45	-0.00175461	-0.00168282	6.93252e-05	-3.03647e-06	-0.00176799	1.88803e-05	-4.98329e-32	-1.16881e-19
1785.1	-0.0021227	-0.00201989	8.21721e-05	-6.17163e-06	-0.00211046	1.45775e-05	-1.67234e-31	-1.81991e-20
1785.74	-0.00240962	-0.00229953	9.68096e-05	-1.19708e-05	-0.0023955	1.11281e-05	-5.54761e-31	-2.70427e-21
1786.38	-0.00257483	-0.00248584	0.000113364	-2.21584e-05	-0.00258544	8.39889e-06	-1.81913e-30	-3.83479e-22
1787.03	-0.00260098	-0.00255427	0.000131944	-3.91421e-05	-0.00265334	6.26735e-06	-5.89653e-30	-5.18949e-23
1787.67	-0.00249216	-0.00249795	0.00015264	-6.59844e-05	-0.00258923	4.6239e-06	-1.88932e-29	-6.70192e-24
1788.31	-0.00227062	-0.0023298	0.000175513	-0.000106153	-0.00240253	3.37283e-06	-5.98395e-29	-8.25973e-25
1788.95	-0.00197139	-0.00207971	0.000200591	-0.000162971	-0.00211977	2.43245e-06	-1.87347e-28	-9.71457e-26
1789.6	-0.00163609	-0.00178756	0.000227863	-0.000238772	-0.00177839	1.73442e-06	-5.79801e-28	-1.09037e-26
1790.24	-0.00130176	-0.00149403	0.000257276	-0.000333848	-0.00141868	1.22272e-06	-1.77373e-27	-1.16792e-27
1790.88	-0.0009946	-0.00123201	0.000288725	-0.000445455	-0.00107613	8.52243e-07	-5.36378e-27	-1.19384e-28
1791.53	-0.00072962	-0.00102076	0.000322056	-0.000567219	-0.00077618	5.87302e-07	-1.60335e-26	-1.16458e-29
1792.17	-0.000515758	-0.000864142	0.00035706	-0.000689271	-0.000532331	4.00148e-07	-4.73765e-26	-1.08414e-30
1792.81	-0.000354906	-0.000752733	0.00039347	-0.000799319	-0.000347152	2.69553e-07	-1.3838e-25	-9.63149e-32
1793.45	-0.000238972	-0.000668713	0.000430966	-0.000884591	-0.000215268	1.79526e-07	-3.99536e-25	-8.16568e-33
1794.1	-0.000150962	-0.000591868	0.000469176	-0.000934234	-0.000126928	1.18216e-07	-1.14029e-24	-6.60668e-34
1794.74	-7.25481e-05	-0.000504994	0.000507681	-0.000941588	-7.11635e-05	7.69633e-08	-3.21699e-24	-5.10112e-35
1795.38	9.65196e-06	-0.000397515	0.000546018	-0.000905645	-3.79382e-05	4.95399e-08	-8.97137e-24	-3.75871e-36
1796.03	0.000102328	-0.000266785	0.000583693	-0.000831278	-1.92316e-05	3.15274e-08	-2.47311e-23	-2.64304e-37
1796.67	0.000206413	-0.00011722	0.000620189	-0.000728159	-9.2699e-06	1.98374e-08	-6.73911e-23	-1.77362e-38
1797.31	0.000316652	4.20459e-05	0.000654974	-0.000608692	-4.24868e-06	1.23408e-08	-1.81525e-22	-1.13582e-39
1797.95	0.000423204	0.000200098	0.000687522	-0.00048558	-1.85163e-06	7.59035e-09	-4.83334e-22	-6.94144e-41
1798.6	0.00051651	0.000346881	0.000717315	-0.000369671	-7.67315e-07	4.61577e-09	-1.27213e-21	-4.04838e-42
1799.24	0.000592591	0.000474994	0.000743866	-0.000268573	-3.02352e-07	2.77517e-09	-3.30973e-21	-2.25322e-43
1799.88	0.000651998	0.000580408	0.000766728	-0.000186209	-1.13285e-07	1.64967e-09	-8.51191e-21	-1.19679e-44
1800.53	0.000695477	0.000662261	0.000785505	-0.000123205	-4.03601e-08	9.69539e-10	-2.1639e-20	-6.06633e-46
1801.17	0.000721955	0.000722061	0.000799868	-7.77948e-05	-1.36726e-08	5.63374e-10	-5.43779e-20	-2.93443e-47
1801.81	0.000730798	0.000762679	0.000809561	-4.68773e-05	-4.40425e-09	3.23661e-10	-1.35077e-19	-1.35461e-48
1802.45	0.000724972	0.00078745	0.000814407	-2.69567e-05	-1.349e-09	1.83842e-10	-3.31679e-19	-5.96753e-50
1803.1	0.000709989	0.000799527	0.000814321	-1.47932e-05	-3.92891e-10	1.03244e-10	-8.05062e-19	-2.50881e-51
1803.74	0.000689249	0.000801555	0.000809302	-7.7473e-06	-1.08806e-10	5.7325e-11	-1.93159e-18	-1.00654e-52
1804.38	0.000663942	0.000795571	0.000799443	-3.87195e-06	-2.86518e-11	3.14693e-11	-4.58116e-18	-3.85379e-54
1805.03	0.000633421	0.000783074	0.00078492	-1.84672e-06	-7.17418e-12	1.70802e-11	-1.07402e-17	-1.40811e-55
1805.67	0.000596418	0.000765153	0.000765994	-8.40548e-07	-1.7081e-12	9.16556e-12	-2.48899e-17	-4.90992e-57
1806.31	0.000553404	0.000742631	0.000742996	-3.65104e-07	-3.86699e-13	4.86282e-12	-5.70176e-17	-1.63382e-58
1806.95	0.000508394	0.000716172	0.000716323	-1.51343e-07	-8.32441e-14	2.55082e-12	-1.29113e-16	-5.18833e-60
1807.6	0.000465843	0.000686365	0.000686425	-5.98685e-08	-1.70394e-14	1.32292e-12	-2.89006e-16	-1.57232e-61
1808.24	0.000427295	0.000653768	0.00065379	-2.2601e-08	-3.31646e-15	6.78343e-13	-6.39468e-16	-4.54723e-63
1808.88	0.000391221	0.000618927	0.000618936	-8.14231e-09	-6.13783e-16	3.43896e-13	-1.39864e-15	-1.255e-64
1809.52	0.000355669	0.000582387	0.00058239	-2.79936e-09	-1.08013e-16	1.72373e-13	-3.0239e-15	-3.30546e-66
1810.17	0.000319239	0.000544682	0.000544683	-9.18465e-10	-1.80741e-17	8.54222e-14	-6.46255e-15	-8.30831e-68
1810.81	0.000281394	0.000506331	0.000506332	-2.87579e-10	-2.87579e-18	4.18539e-14	-1.36526e-14	-1.9929e-69
1811.45	0.000243126	0.00046783	0.00046783	-8.59298e-11	-4.35089e-19	2.02751e-14	-2.85104e-14	-4.56192e-71
1812.1	0.000208747	0.000429638	0.000429638	-2.45032e-11	-6.2592e-20	9.71075e-15	-5.88526e-14	-9.96559e-73
1812.74	0.00018261	0.000392173	0.000392173	-6.66794e-12	-8.56209e-21	4.59837e-15	-1.20089e-13	-2.07754e-74
1813.38	0.000163254	0.000355808	0.000355808	-1.73162e-12	-1.11368e-21	2.15287e-15	-2.42223e-13	-4.13321e-76
1814.02	0.000143533	0.000320859	0.000320859	-4.29147e-13	-1.37741e-22	9.96539e-16	-4.82951e-13	-7.84725e-78
1814.67	0.000118352	0.00028759	0.00028759	-1.01496e-13	-1.61988e-23	4.56071e-16	-9.51843e-13	-1.4218e-79
1815.31	9.03934e-05	0.00025621	0.00025621	-2.2908e-14	-1.81144e-24	2.06364e-16	-1.8544e-12	-2.4584e-81
1815.95	6.63096e-05	0.000226871	0.000226871	-4.93417e-15	-1.92613e-25	9.23201e-17	-3.57122e-12	-4.05655e-83
1816.6	4.92078e-05	0.000199675	0.000199675	-1.01422e-15	-1.94746e-26	4.0834e-17	-6.79836e-12	-6.38782e-85
1817.24	3.54448e-05	0.000174675	0.000174675	-1.9895e-16	-1.87227e-27	1.7857e-17	-1.27929e-11	-9.59932e-87
1817.88	1.94029e-05	0.000151879	0.000151879	-3.72432e-17	-1.71155e-28	7.72073e-18	-2.37961e-11	-1.37664e-88
1818.52	-1.78658e-06	0.000131258	0.000131258	-6.65335e-18	-1.48776e-29	3.30043e-18	-4.37541e-11	-1.88404e-90
1819.17	-2.57244e-05	0.00011275	0.00011275	-1.1343e-18	-1.22968e-30	1.3949e-18	-7.95257e-11	-2.46067e-92
1819.81	-4.62266e-05	9.62649e-05	9.6265e-05	-1.84545e-19	-9.66442e-32	5.82882e-19	-1.4288e-10	-3.06695e-94
1820.45	-5.73104e-05	8.16922e-05	8.16924e-05	-2.86531e-20	-7.22233e-33	2.40813e-19	-2.53752e-10	-3.64798e-96
1821.1	-5.71355e-05	6.89055e-05	6.89059e-05	-4.24554e-21	-5.13215e-34	9.83649e-20	-4.45475e-10	-4.14086e-98
1821.74	-5.04702e-05	5.7768e-05	5.77687e-05	-6.00322e-22	-3.4677e-35	3.9725e-20	-7.73059e-10	-4.48559e-100
1822.38	-4.53388e-05	4.8137e-05	4.81383e-05	-8.1008e-23	-2.22794e-36	1.58617e-20	-1.3261e-09	-4.63703e-102
1823.02	-4.80893e-05	3.98681e-05	3.98703e-05	-1.04319e-23	-1.36109e-37	6.26176e-21	-2.24862e-09	-4.57459e-104
1823.67	-5.896e-05	3.28187e-05	3.28224e-05	-1.28201e-24	-7.90656e-39	2.44403e-21	-3.76904e-09	-4.30681e-106
1824.31	-7.37265e-05	2.68505e-05	2.68567e-05	-1.50352e-25	-4.36727e-40	9.43144e-22	-6.24482e-09	-3.86946e-108
1824.95	-8.68232e-05	2.1832e-05	2.18422e-05	-1.68274e-26	-2.29378e-41	3.59842e-22	-1.02278e-08	-3.3177e-110
1825.6	-9.44055e-05	1.76398e-05	1.76564e-05	-1.7973e-27	-1.14555e-42	1.3574e-22	-1.65586e-08	-2.71466e-112
1826.24	-9.52963e-05	1.41598e-05	1.41863e-05	-1.83195e-28	-5.43998e-44	5.06253e-23	-2.64996e-08	-2.11976e-114
1826.88	-9.14104e-05	1.12872e-05	1.13291e-05	-1.78196e-29	-2.4564e-45	1.86676e-23	-4.19207e-08	-1.5796e-116
1827.52	-8.83432e-05	8.92705e-06	8.99261e-06	-1.65415e-30	-1.05468e-46	6.80569e-24	-6.55531e-08	-1.12331e-118
1828.17	-9.1556e-05	6.99341e-06	7.09474e-06	-1.46535e-31	-4.30591e-48	2.45311e-24	-1.01329e-07	-7.62334e-121
1828.81	-0.000102203	5.40868e-06	5.56351e-06	-1.2388e-32	-1.67158e-49	8.74229e-25	-1.54828e-07	-4.93721e-123
1829.45	-0.000114236	4.10249e-06	4.33634e-06	-9.99429e-34	-6.17036e-51	3.08031e-25	-2.33851e-07	-3.05147e-125
1830.09	-0.000120292	3.01023e-06	3.35937e-06	-7.69475e-35	-2.16577e-52	1.07307e-25	-3.49144e-07	-1.79982e-127
1830.74	-0.000119247	2.07147e-06	2.58675e-06	-5.65365e-36	-7.2283e-54	3.69591e-26	-5.15282e-07	-1.01307e-129
1831.38	-0.000117359	1.22804e-06	1.97976e-06	-3.96419e-37	-2.29392e-55	1.25857e-26	-7.51728e-07	-5.44181e-132
1832.02	-0.000120775	4.21973e-07	1.50603e-06	-2.6526e-38	-6.92217e-57	4.23738e-27	-1.08406e-06	-2.78957e-134
1832.67	-0.00012948	-4.06602e-07	1.13871e-06	-1.69387e-39	-1.98621e-58	1.41052e-27	-1.54532e-06	-1.36466e-136
1833.31	-0.00013881	-1.32173e-06	8.5577e-07	-1.03224e-40	-5.41911e-60	4.64218e-28	-2.1775e-06	-6.3709e-139
1833.95	-0.000146396	-2.39378e-06	6.39236e-07	-6.00307e-42	-1.40589e-61	1.51052e-28	-3.03301e-06	-2.83838e-141
1834.59	-0.000153668	-3.70145e-06	4.74599e-07	-3.33164e-43	-3.46813e-63	4.85954e-29	-4.17605e-06	-1.20679e-143
1835.24	-0.000161326	-5.33348e-06	3.50231e-07	-1.76455e-44	-8.13501e-65	1.5457e-29	-5.68371e-06	-4.89647e-146
1835.88	-0.000167173	-7.3898e-06	2.56887e-07	-8.91866e-46	-1.81444e-66	4.86091e-30	-7.64669e-06	-1.89595e-148
1836.52	-0.000168437	-9.98199e-06	1.87281e-07	-4.30188e-47	-3.84809e-68	1.51138e-30	-1.01693e-05	-7.00587e-151
1837.17	-0.00016555	-1.32328e-05	1.35708e-07	-1.9802e-48	-7.76013e-70	4.64611e-31	-1.33685e-05	-2.47052e-153
1837.81	-0.000161068	-1.72742e-05	9.77411e-08	-8.69861e-50	-1.48803e-71	1.41211e-31	-1.73719e-05	-8.31396e-156
1838.45	-0.000158291	-2.22447e-05	6.99699e-08	-3.64656e-51	-2.71317e-73	4.24336e-32	-2.23147e-05	-2.67004e-158
1839.09	-0.000159216	-2.82842e-05	4.9786e-08	-1.45884e-52	-4.70392e-75	1.2607e-32	-2.8334e-05	-8.18314e-161
1839.74	-0.000163866	-3.55279e-05	3.52099e-08	-5.56961e-54	-7.75468e-77	3.70322e-33	-3.55631e-05	-2.39339e-163
1840.38	-0.000170243	-4.40984e-05	2.47505e-08	-2.02924e-55	-1.21559e-78	1.07549e-33	-4.41232e-05	-6.68033e-166
1841.02	-0.000176813	-5.40966e-05	1.72927e-08	-7.05558e-57	-1.81189e-80	3.08814e-34	-5.41139e-05	-1.7794e-168
1841.67	-0.000182525	-6.55914e-05	1.2009e-08	-2.34112e-58	-2.56801e-82	8.76698e-35	-6.56034e-05	-4.52317e-171
1842.31	-0.000186225	-7.86092e-05	8.28913e-09	-7.41321e-60	-3.46083e-84	2.46074e-35	-7.86175e-05	-1.09724e-173
1842.95	-0.00018675	-9.31237e-05	5.68687e-09	-2.24017e-61	-4.43491e-86	6.82876e-36	-9.31294e-05	-2.54012e-176
1843.59	-0.000185598	-0.000109047	3.87793e-09	-6.46021e-63	-5.40392e-88	1.87362e-36	-0.000109051	-5.61173e-179
1844.24	-0.000188706	-0.000126223	2.62838e-09	-1.77789e-64	-6.26113e-90	5.08256e-37	-0.000126226	-1.18313e-181
1844.88	-0.000202133	-0.000144423	1.77067e-09	-4.66932e-66	-6.89791e-92	1.36316e-37	-0.000144424	-2.38044e-184
1845.52	-0.000225856	-0.000163345	1.18562e-09	-1.17029e-67	-7.22607e-94	3.6147e-38	-0.000163346	-4.57062e-187
1846.17	-0.000254442	-0.000182621	7.89076e-10	-2.79915e-69	-7.19791e-96	9.47678e-39	-0.000182621	-8.37499e-190
1846.81	-0.000281739	-0.000201822	5.21978e-10	-6.38926e-71	-6.81759e-98	2.45647e-39	-0.000201823	-1.46449e-192
1847.45	-0.000305169	-0.000220477	3.432e-10	-1.39177e-72	-6.14011e-100	6.29541e-40	-0.000220477	-2.44387e-195
1848.09	-0.000323903	-0.000238085	2.24287e-10	-2.89317e-74	-5.25824e-102	1.59514e-40	-0.000238085	-3.99336e-198
1848.74	-0.000337138	-0.000254142	1.45687e-10	-5.73948e-76	-4.28179e-104	3.9961e-41	-0.000254142	-6.56936e-197
1849.38	-0.000344837	-0.00026816	9.40592e-11	-1.08658e-77	-3.31536e-106	9.89773e-42	-0.000268161	-4.05868e-194
1850.02	-0.000346954	-0.000279698	6.0359e-11	-1.96311e-79	-2.44093e-108	2.4238e-42	-0.000279698	-2.39319e-191
1850.66	-0.000342744	-0.000288375	3.84985e-11	-3.38468e-81	-1.70884e-110	5.86842e-43	-0.000288375	-1.34667e-188
1851.31	-0.000332104	-0.000293902	2.44066e-11	-5.56907e-83	-1.13754e-112	1.40478e-43	-0.000293902	-7.23165e-186
1851.95	-0.000316896	-0.000296088	1.53792e-11	-8.7446e-85	-7.2003e-115	3.32472e-44	-0.000296088	-3.70599e-183
1852.59	-0.000299765	-0.00029486	9.63208e-12	-1.31035e-86	-4.33367e-117	7.77976e-45	-0.00029486	-1.81244e-180
1853.24	-0.000280695	-0.000290259	5.99609e-12	-1.87382e-88	-2.48017e-119	1.79986e-45	-0.000290259	-8.4589e-178
1853.88	-0.00025711	-0.000282442	3.71003e-12	-2.55717e-90	-1.34967e-121	4.11694e-46	-0.000282442	-3.76752e-175
1854.52	-0.000227675	-0.000271675	2.28165e-12	-3.33029e-92	-6.9838e-124	9.31047e-47	-0.000271675	-1.60136e-172
1855.16	-0.000195832	-0.000258312	1.3947e-12	-4.13901e-94	-3.43619e-126	2.08176e-47	-0.000258312	-6.49553e-170
1855.81	-0.000166574	-0.000242781	8.47375e-13	-4.90911e-96	-1.60762e-128	4.60207e-48	-0.000242781	-2.51438e-167
1856.45	-0.000142538	-0.000225559	5.11718e-13	-5.5565e-98	-7.15169e-131	1.00586e-48	-0.000225559	-9.28837e-165
1857.09	-0.000122078	-0.000207147	3.07148e-13	-6.00192e-100	-3.0252e-133	2.17362e-49	-0.000207147	-3.27446e-162
1857.74	-0.000103457	-0.000188051	1.83243e-13	-6.18688e-102	-1.2168e-135	4.644e-50	-0.000188051	-1.10162e-159
1858.38	-8.85227e-05	-0.000168751	1.08659e-13	-6.08617e-104	-4.65378e-138	9.80986e-51	-0.000168751	-3.53683e-157
1859.02	-8.27818e-05	-0.000149689	6.40424e-14	-5.71358e-106	-1.69243e-140	2.04878e-51	-0.000149689	-1.08365e-154
1859.66	-8.97954e-05	-0.000131254	3.75172e-14	-5.11888e-108	-5.85245e-143	4.23049e-52	-0.000131254	-3.16851e-152
1860.31	-0.000105771	-0.000113765	2.18451e-14	-4.84053e-110	-1.92435e-145	8.63671e-53	-0.000113765	-8.84124e-150
1860.95	-0.000120688	-9.74716e-05	1.26427e-14	-1.55541e-109	-6.01659e-148	1.74328e-53	-9.74716e-05	-2.35431e-147
1861.59	-0.000126246	-8.25513e-05	7.27257e-15	-5.06011e-108	-1.7887e-150	3.47897e-54	-8.25513e-05	-5.98279e-145
1862.24	-0.000121954	-6.91107e-05	4.15811e-15	-1.60931e-106	-5.05641e-153	6.86427e-55	-6.91107e-05	-1.4509e-142
1862.88	-0.000114725	-5.71928e-05	2.36302e-15	-4.99208e-105	-1.35915e-155	1.33906e-55	-5.71928e-05	-3.35785e-140
1863.52	-0.000111243	-4.67857e-05	1.33474e-15	-1.51039e-103	-3.47388e-158	2.58267e-56	-4.67857e-05	-7.41612e-138
1864.16	-0.000112826	-3.7832e-05	7.49362e-16	-4.4572e-102	-8.44271e-161	4.92494e-57	-3.7832e-05	-1.56309e-135
1864.81	-0.000114639	-3.02399e-05	4.18165e-16	-1.28292e-100	-1.95105e-163	9.28526e-58	-3.02399e-05	-3.14401e-133
1865.45	-0.000111363	-2.38934e-05	2.31943e-16	-3.60166e-99	-4.28721e-166	1.73081e-58	-2.38934e-05	-6.03495e-131
1866.09	-0.000100099	-1.86616e-05	1.27919e-16	-9.8621e-98	-8.95781e-169	3.18983e-59	-1.86616e-05	-1.10549e-128
1866.74	-8.22626e-05	-1.44077e-05	7.03855e-17	-2.63391e-96	-1.77971e-171	5.81229e-60	-1.44077e-05	-1.93255e-126
1867.38	-6.21156e-05	-1.09956e-05	3.99057e-17	-6.86116e-95	-3.36214e-174	1.0471e-60	-1.09956e-05	-3.224e-124
1868.02	-4.50299e-05	-8.29498e-06	2.97367e-17	-1.74325e-93	-6.03951e-177	1.86506e-61	-8.29498e-06	-5.13278e-122
1868.66	-3.35834e-05	-6.18568e-06	5.65371e-17	-4.32001e-92	-1.03159e-179	3.28443e-62	-6.18568e-06	-7.79832e-120
1869.31	-2.61072e-05	-4.55968e-06	2.24748e-16	-1.04418e-90	-1.67547e-182	5.71859e-63	-4.55968e-06	-1.13068e-117
1869.95	-1.81383e-05	-3.32244e-06	1.01816e-15	-2.46168e-89	-2.58752e-185	9.8442e-64	-3.32244e-06	-1.56449e-115
1870.59	-6.13037e-06	-2.39307e-06	4.536e-15	-5.66045e-88	-3.79971e-188	1.67546e-64	-2.39307e-06	-2.06584e-113
1871.23	9.81984e-06	-1.70383e-06	1.9508e-14	-1.26951e-86	-5.30564e-191	2.81961e-65	-1.70383e-06	-2.60322e-111
1871.88	2.54953e-05	-1.19915e-06	8.08183e-14	-2.77706e-85	-7.04441e-194	4.71374e-66	-1.19916e-06	-3.13053e-109
1872.52	3.53378e-05	-8.34254e-07	3.22445e-13	-5.92516e-84	-8.89349e-197	9.78787e-67	-8.34254e-07	-3.59266e-107
1873.16	3.66354e-05	-5.73714e-07	1.2389e-12	-1.23305e-82	-1.06763e-199	1.97154e-66	-5.73715e-07	-3.93465e-105
1873.81	3.25843e-05	-3.9e-07	4.58408e-12	-2.50278e-81	-1.37639e-202	1.64318e-65	-3.90004e-07	-4.11232e-103
1874.45	2.83405e-05	-2.62054e-07	1.63343e-11	-4.95486e-80	-5.05199e-200	1.45994e-64	-2.6207e-07	-4.10166e-101
1875.09	2.67872e-05	-1.74021e-07	5.60512e-11	-9.56764e-79	-1.50727e-196	1.3026e-63	-1.74077e-07	-3.90413e-99
1875.73	2.7604e-05	-1.14113e-07	1.85226e-10	-1.80195e-77	-4.18866e-193	1.16785e-62	-1.14298e-07	-3.54634e-97
1876.38	2.94053e-05	-7.3595e-08	5.89459e-10	-3.31014e-76	-1.08421e-189	1.053e-61	-7.41845e-08	-3.07417e-95
1877.02	3.26677e-05	-4.57885e-08	1.8065e-09	-5.9308e-75	-2.61401e-186	9.54592e-61	-4.75951e-08	-2.54312e-93
1877.66	3.89411e-05	-2.4853e-08	5.33161e-09	-1.03644e-73	-5.87023e-183	8.68878e-60	-3.01846e-08	-2.0077e-91
1878.31	4.90002e-05	-3.76932e-09	1.51534e-08	-1.76662e-72	-1.22789e-179	7.92251e-59	-1.89228e-08	-1.51259e-89
1878.95	6.06174e-05	2.97499e-08	4.14761e-08	-2.937e-71	-2.3923e-176	7.21593e-58	-1.17262e-08	-1.08751e-87
1879.59	7.07454e-05	1.02142e-07	1.09325e-07	-4.76246e-70	-4.34138e-173	6.54513e-57	-7.18303e-09	-7.46174e-86
1880.23	7.91904e-05	2.73158e-07	2.77507e-07	-7.53221e-69	-7.33828e-170	5.89444e-56	-4.34943e-09	-4.88582e-84
1880.88	9.02739e-05	6.75762e-07	6.78365e-07	-1.16193e-67	-1.15536e-166	5.2564e-55	-2.60334e-09	-3.053e-82
1881.52	0.00010939	1.59539e-06	1.59693e-06	-1.74823e-66	-1.69431e-163	4.63066e-54	-1.5403e-09	-1.82057e-80
1882.16	0.000138446	3.61939e-06	3.62029e-06	-2.56557e-65	-2.31432e-160	4.02221e-53	-9.00856e-10	-1.03604e-78
1882.81	0.000176742	7.90324e-06	7.90377e-06	-3.67227e-64	-2.94448e-157	3.43934e-52	-5.20811e-10	-5.62655e-77
1883.45	0.000225424	1.66169e-05	1.66172e-05	-5.12684e-63	-3.48939e-154	2.89161e-51	-2.97632e-10	-2.91607e-75
1884.09	0.000289717	3.36446e-05	3.36448e-05	-6.98119e-62	-3.85163e-151	2.38804e-50	-1.68134e-10	-1.44226e-73
1884.73	0.000378604	6.56009e-05	6.5601e-05	-9.27201e-61	-3.95999e-148	1.93579e-49	-9.38869e-11	-6.80742e-72
1885.38	0.000502518	0.000123179	0.000123179	-1.20111e-59	-3.79226e-145	1.53937e-48	-5.18239e-11	-3.06628e-70
1886.02	0.000672552	0.00022274	0.00022274	-1.5176e-58	-3.38265e-142	1.20035e-47	-2.82768e-11	-1.31806e-68
1886.66	0.000902974	0.000387875	0.000387875	-1.87023e-57	-2.81042e-139	9.17508e-47	-1.52513e-11	-5.40688e-67
1887.31	0.00121449	0.000650459	0.000650459	-2.24802e-56	-2.1749e-136	6.8729e-46	-8.13124e-12	-2.11666e-65
1887.95	0.0016348	0.00105047	0.00105047	-2.63553e-55	-1.5677e-133	5.04446e-45	-4.28531e-12	-7.90766e-64
1888.59	0.00219457	0.00163373	0.00163373	-3.0137e-54	-1.05255e-130	3.62719e-44	-2.23246e-12	-2.81926e-62
1889.23	0.00292576	0.00244686	0.00244686	-3.36123e-53	-6.58223e-128	2.55482e-43	-1.14963e-12	-9.59213e-61
1889.88	0.00386044	0.00352918	0.00352918	-3.65646e-52	-3.83407e-125	1.76256e-42	-5.85207e-13	-3.11448e-59
1890.52	0.00502693	0.00490198	0.00490198	-3.8796e-51	-2.08019e-122	1.19095e-41	-2.94466e-13	-9.65048e-58
1891.16	0.00644106	0.00655698	0.00655698	-4.01494e-50	-1.05123e-119	7.88118e-41	-1.46466e-13	-2.85367e-56
1891.81	0.00809676	0.00844637	0.00844637	-4.05262e-49	-4.94824e-117	5.10758e-40	-7.20134e-14	-8.05284e-55
1892.45	0.0099561	0.0104778	0.0104778	-3.98986e-48	-2.16948e-114	3.24156e-39	-3.49997e-14	-2.16863e-53
1893.09	0.0119373	0.0125171	0.0125171	-3.83127e-47	-8.85966e-112	2.01463e-38	-1.68148e-14	-5.57334e-52
1893.73	0.013904	0.0144003	0.0144003	-3.58834e-46	-3.37002e-109	1.22613e-37	-7.98533e-15	-1.3669e-50
1894.38	0.0156693	0.0159542	0.0159542	-3.278e-45	-1.194e-106	7.30741e-37	-3.74861e-15	-3.19925e-49
1895.02	0.0170205	0.017022	0.017022	-2.92072e-44	-3.94028e-104	4.26459e-36	-1.73949e-15	-7.14582e-48
1895.66	0.0177635	0.0174896	0.0174896	-2.53825e-43	-1.21118e-101	2.43709e-35	-7.979e-16	-1.52317e-46
1896.3	0.0177672	0.0173055	0.0173055	-2.15152e-42	-3.4677e-99	1.36378e-34	-3.61785e-16	-3.09838e-45
1896.95	0.0169969	0.01649	0.01649	-1.77877e-41	-9.24762e-97	7.47294e-34	-1.62154e-16	-6.01468e-44
1897.59	0.0155323	0.0151319	0.0151319	-1.43436e-40	-2.29707e-94	4.00971e-33	-7.18423e-17	-1.11425e-42
1898.23	0.013555	0.013372	0.013372	-1.12814e-39	-5.31462e-92	2.10671e-32	-3.14636e-17	-1.9699e-41
1898.88	0.0113081	0.0113799	0.0113799	-8.65428e-39	-1.14531e-89	1.08385e-31	-1.3621e-17	-3.32352e-40
1899.52	0.00903828	0.00932633	0.00932633	-6.47537e-38	-2.29897e-87	5.4601e-31	-5.82892e-18	-5.3511e-39
1900.16	0.00694623	0.00736068	0.00736068	-4.72566e-37	-4.29828e-85	2.69341e-30	-2.4657e-18	-8.22203e-38
1900.8	0.00516223	0.00559448	0.00559448	-3.36377e-36	-7.48535e-83	1.30098e-29	-1.03102e-18	-1.20561e-36
1901.45	0.0037415	0.00409482	0.00409482	-2.33536e-35	-1.21418e-80	6.15328e-29	-4.26159e-19	-1.68705e-35
1902.09	0.00267453	0.00288632	0.00288632	-1.58141e-34	-1.83447e-78	2.84977e-28	-1.7412e-19	-2.25288e-34
1902.73	0.00190866	0.00195924	0.00195924	-1.04449e-33	-2.58161e-76	1.29235e-27	-7.03239e-20	-2.87105e-33
1903.38	0.00137357	0.00128075	0.00128075	-6.7286e-33	-3.38397e-74	5.73872e-27	-2.80758e-20	-3.49169e-32
1904.02	0.00100315	0.000806262	0.000806262	-4.22777e-32	-4.13159e-72	2.49526e-26	-1.10799e-20	-4.05249e-31
1904.66	0.000746536	0.000488791	0.000488791	-2.59097e-31	-4.69854e-70	1.06239e-25	-4.32229e-21	-4.48848e-30
1905.3	0.000567231	0.000285372	0.000285372	-1.54874e-30	-4.97694e-68	4.42911e-25	-1.66674e-21	-4.74426e-29
1905.95	0.000439366	0.000160461	0.000160461	-9.02942e-30	-4.9104e-66	1.80807e-24	-6.35325e-22	-4.78552e-28
1906.59	0.000345447	8.69253e-05	8.69253e-05	-5.13459e-29	-4.5126e-64	7.22732e-24	-2.39387e-22	-4.60661e-27
1907.23	0.00027464	4.54417e-05	4.54417e-05	-2.84784e-28	-3.8627e-62	2.82882e-23	-8.91618e-23	-4.2318e-26
1907.88	0.000220144	2.31083e-05	2.31083e-05	-1.5406e-27	-3.07971e-60	1.08417e-22	-3.28271e-23	-3.70989e-25
1908.52	0.00017707	1.18625e-05	1.18625e-05	-8.12888e-27	-2.28709e-58	4.06872e-22	-1.19471e-23	-3.10376e-24
1909.16	0.000142729	7.08757e-06	7.08757e-06	-4.18346e-26	-1.58202e-56	1.49514e-21	-4.298e-24	-2.47803e-23
1909.8	0.000117501	6.58687e-06	6.58687e-06	-2.09993e-25	-1.01928e-54	5.37984e-21	-1.52843e-24	-1.88807e-22
1910.45	0.000103599	9.9748e-06	9.9748e-06	-1.02811e-24	-6.11689e-53	1.89549e-20	-5.3728e-25	-1.37284e-21
1911.09	0.00010226	1.84616e-05	1.84616e-05	-4.9095e-24	-3.41919e-51	6.53943e-20	-1.86694e-25	-9.52605e-21
1911.73	0.000113684	3.4966e-05	3.4966e-05	-2.28666e-23	-1.7802e-49	2.20914e-19	-6.41262e-26	-6.30809e-20
1912.38	0.000140204	6.44536e-05	6.44536e-05	-1.03879e-22	-8.63319e-48	7.30752e-19	-2.17729e-26	-3.98634e-19
1913.02	0.000186454	0.000114349	0.000114349	-4.6028e-22	-3.89967e-46	2.36691e-18	-7.30753e-27	-2.40405e-18
1913.66	0.00025864	0.000194795	0.000194795	-1.98921e-21	-1.64074e-44	7.50687e-18	-2.42438e-27	-1.38357e-17
1914.3	0.000365592	0.000318476	0.000318476	-8.38499e-21	-6.4299e-43	2.33131e-17	-7.95071e-28	-7.59896e-17
1914.95	0.000519424	0.00049967	0.00049967	-3.44738e-20	-2.34706e-41	7.08935e-17	-2.57743e-28	-3.98288e-16
1915.59	0.000736459	0.000752292	0.000752292	-1.38243e-19	-7.97994e-40	2.11095e-16	-8.25927e-29	-1.99219e-15
1916.23	0.0010335	0.00108689	0.00108689	-5.40702e-19	-2.52714e-38	6.15478e-16	-2.61621e-29	-9.50951e-15
1916.87	0.00142301	0.00150689	0.00150689	-2.06272e-18	-7.45441e-37	1.75717e-15	-8.19178e-30	-4.33187e-14
1917.52	0.00190962	0.00200479	0.00200479	-7.67513e-18	-2.04811e-35	4.91222e-15	-2.53547e-30	-1.88315e-13
1918.16	0.00248201	0.0025595	0.0025595	-2.78546e-17	-5.24139e-34	1.34465e-14	-7.75738e-31	-7.81243e-13
1918.8	0.00310674	0.0031357	0.0031357	-9.8599e-17	-1.24938e-32	3.60415e-14	-2.3461e-31	-3.09299e-12
1919.45	0.00372738	0.00368646	0.00368646	-3.40418e-16	-2.77395e-31	9.45936e-14	-7.01378e-32	-1.16859e-11
1920.09	0.00427085	0.00415892	0.00415892	-1.14635e-15	-5.73662e-30	2.431e-13	-2.07269e-32	-4.21346e-11
1920.73	0.00466127	0.00450242	0.00450242	-3.7652e-15	-1.10502e-28	6.11751e-13	-6.05466e-33	-1.44979e-10
1921.37	0.00483663	0.00467742	0.00467742	-1.20621e-14	-1.9826e-27	1.5074e-12	-1.74832e-33	-4.76064e-10
1922.02	0.00476535	0.00466297	0.00466297	-3.76896e-14	-3.31327e-26	3.63703e-12	-4.99032e-34	-1.49182e-09
1922.66	0.00445941	0.0044608	0.0044608	-1.14865e-13	-5.15744e-25	8.59273e-12	-1.40802e-34	-4.46126e-09
1923.3	0.00397066	0.00409505	0.00409505	-3.4144e-13	-7.47765e-24	1.98783e-11	-3.92705e-35	-1.27318e-08
1923.95	0.00337483	0.00360745	0.00360745	-9.89939e-13	-1.00984e-22	4.50292e-11	-1.08268e-35	-3.4675e-08
1924.59	0.00274816	0.00304956	0.00304956	-2.79941e-12	-1.27026e-21	9.98789e-11	-2.95057e-36	-9.01226e-08
1925.23	0.00215196	0.00247381	0.00247382	-7.72129e-12	-1.48829e-20	2.16929e-10	-7.94855e-37	-2.23533e-07
1925.87	0.00162482	0.0019257	0.00192573	-2.0772e-11	-1.62419e-19	4.61348e-10	-2.11663e-37	-5.29105e-07
1926.52	0.00118355	0.00143842	0.00143853	-5.45042e-11	-1.65098e-18	9.60739e-10	-5.57157e-38	-1.19518e-06
1927.16	0.000828819	0.00103089	0.00103118	-1.39491e-10	-1.56315e-17	1.95906e-09	-1.44972e-38	-2.57642e-06
1927.8	0.000552375	0.000708536	0.000709328	-3.482e-10	-1.37853e-16	3.91162e-09	-3.72879e-39	-5.3002e-06
1928.45	0.000341862	0.000466234	0.000468225	-8.47766e-10	-1.13236e-15	7.64773e-09	-9.48039e-40	-1.04054e-05
1929.09	0.000184771	0.000291898	0.000296591	-2.0132e-09	-8.6638e-15	1.46412e-08	-2.38267e-40	-1.94947e-05
1929.73	7.10053e-05	0.000169913	0.000180283	-4.66298e-09	-6.17428e-14	2.74464e-08	-5.92061e-41	-3.48551e-05
1930.37	-9.64874e-06	8.36607e-05	0.000105159	-1.05343e-08	-4.09845e-13	5.03807e-08	-1.46127e-41	-5.94713e-05
1931.02	-7.05057e-05	1.70504e-05	5.88622e-05	-2.32119e-08	-2.534e-12	9.0555e-08	-3.95283e-42	-9.68367e-05
1931.66	-0.000125945	-4.46711e-05	3.16169e-05	-4.98863e-08	-1.45932e-11	1.59379e-07	-3.1604e-42	-0.000150475
1932.3	-0.000186055	-0.00011429	1.62967e-05	-1.04572e-07	-7.82792e-11	2.74676e-07	-1.26187e-41	-0.000223142
1932.95	-0.000252498	-0.000201655	8.06069e-06	-2.13804e-07	-3.91109e-10	4.63535e-07	-6.56298e-41	-0.000315782
1933.59	-0.000322627	-0.000312161	3.82597e-06	-4.26364e-07	-1.82014e-09	7.65983e-07	-3.40832e-40	-0.000426469
1934.23	-0.000394901	-0.000444972	1.74263e-06	-8.29297e-07	-7.8898e-09	1.23946e-06	-1.74286e-39	-0.000549639
1934.87	-0.000471198	-0.00059182	7.61666e-07	-1.57327e-06	-3.18553e-08	1.96394e-06	-8.76987e-39	-0.000676021
1935.52	-0.000554147	-0.000737402	3.19462e-07	-2.91114e-06	-1.19799e-07	3.04723e-06	-4.34231e-38	-0.000793477
1936.16	-0.000644009	-0.000862097	1.28578e-07	-5.25396e-06	-4.1964e-07	4.6299e-06	-2.11566e-37	-0.000888791
1936.8	-0.000737194	-0.000946848	4.96607e-08	-9.24858e-06	-1.36917e-06	6.88863e-06	-1.0143e-36	-0.000950072
1937.44	-0.000826459	-0.000979122	1.84057e-08	-1.58792e-05	-4.16094e-06	1.00368e-05	-4.78505e-36	-0.000969182
1938.09	-0.000905507	-0.000958334	6.54618e-09	-2.65917e-05	-1.17783e-05	1.43209e-05	-2.22127e-35	-0.000943508
1938.73	-0.000975131	-0.000899524	2.23418e-09	-4.34339e-05	-3.10545e-05	2.0011e-05	-1.01465e-34	-0.000876552
1939.37	-0.0010485	-0.000835179	7.31718e-10	-6.91952e-05	-7.62647e-05	2.73846e-05	-4.56061e-34	-0.000777143
1940.02	-0.00115335	-0.0008162	2.29966e-10	-0.00010752	-0.000174452	3.67034e-05	-2.01711e-33	-0.000657531
1940.66	-0.00133335	-0.000912934	6.93553e-11	-0.000162954	-0.000371693	4.81829e-05	-8.77872e-33	-0.000530912
1941.3	-0.00164893	-0.00121545	2.0072e-11	-0.000240883	-0.000737645	6.19586e-05	-3.7595e-32	-0.000409092
1941.94	-0.00217977	-0.0018293	5.57438e-12	-0.000347306	-0.00136353	7.80509e-05	-1.58426e-31	-0.000300823
1942.59	-0.00302433	-0.00286098	1.48559e-12	-0.000488409	-0.00234767	9.63342e-05	-6.56931e-31	-0.000211102
1943.23	-0.00429166	-0.00438855	3.79922e-13	-0.000669915	-0.00376499	0.000116517	-2.68046e-30	-0.000141373
1943.87	-0.00607173	-0.0064202	9.32365e-14	-0.000896231	-0.005624	0.000138134	-1.07621e-29	-9.03503e-05
1944.52	-0.00837924	-0.00885326	2.1957e-14	-0.00116946	-0.00782495	0.000160566	-4.25186e-29	-5.51044e-05
1945.16	-0.0110755	-0.0114554	4.96197e-15	-0.00148839	-0.0101408	0.000183071	-1.65295e-28	-3.20726e-05
1945.8	-0.0138123	-0.013888	1.07605e-15	-0.00184761	-0.012241	0.000204848	-6.32318e-28	-1.78145e-05
1946.44	-0.016066	-0.0157768	2.23926e-16	-0.00223702	-0.0137632	0.000225107	-2.38018e-27	-9.44292e-06
1947.09	-0.0173057	-0.0168129	4.47168e-17	-0.00264176	-0.0144136	0.000243155	-8.81616e-27	-4.77684e-06
1947.73	-0.0172356	-0.0168446	8.56907e-18	-0.00304286	-0.0140599	0.000258472	-3.21326e-26	-2.30643e-06
1948.37	-0.0159559	-0.0159224	1.57577e-18	-0.00341851	-0.0127746	0.000270784	-1.15242e-25	-1.06396e-06
1949.02	-0.0139127	-0.0142768	2.78064e-19	-0.00374589	-0.010811	0.000280095	-4.06697e-25	-4.72043e-07
1949.66	-0.0116694	-0.0122388	4.70861e-20	-0.00400348	-0.00852197	0.000286703	-1.4123e-24	-2.10347e-07
1950.3	-0.00965983	-0.0101392	7.65131e-21	-0.00417336	-0.00625704	0.000291165	-4.82595e-24	-1.17935e-07
1950.94	-0.00806947	-0.00822811	1.19309e-21	-0.00424325	-0.00427909	0.000294239	-1.62268e-23	-1.3326e-07
1951.59	-0.00686678	-0.006637	1.78529e-22	-0.004208	-0.00272577	0.000296788	-5.36885e-23	-2.68774e-07
1952.23	-0.00591609	-0.00538785	2.56352e-23	-0.00407022	-0.00161727	0.000299677	-1.74794e-22	-6.18094e-07
1952.87	-0.00508081	-0.00443018	3.53232e-24	-0.00383994	-0.000893777	0.000303661	-5.59973e-22	-1.3979e-06
1953.52	-0.00427583	-0.00368456	4.67067e-25	-0.00353343	-0.000460078	0.000309287	-1.76525e-21	-3.03071e-06
1954.16	-0.00347661	-0.00307594	5.92644e-26	-0.00317127	-0.000220591	0.000316824	-5.47571e-21	-6.27464e-06
1954.8	-0.00270472	-0.0025507	7.21611e-27	-0.00277609	-9.85143e-05	0.000326214	-1.67137e-20	-1.23984e-05
1955.44	-0.00200607	-0.00207965	8.43156e-28	-0.00237028	-4.09794e-05	0.000337081	-5.01996e-20	-2.33799e-05
1956.09	-0.00142287	-0.00165324	9.45382e-29	-0.00197392	-1.58776e-05	0.000348756	-1.48363e-19	-4.20737e-05
1956.73	-0.000975583	-0.00127422	1.01719e-29	-0.00160334	-5.73013e-06	0.000360349	-4.31467e-19	-7.22555e-05
1957.37	-0.000659694	-0.000951345	1.05025e-30	-0.00127024	-1.92643e-06	0.000370839	-1.23471e-18	-0.000118419
1958.02	-0.000456056	-0.000695034	1.04059e-31	-0.000981546	-6.04506e-07	0.000379173	-3.47682e-18	-0.000185211
1958.66	-0.000342069	-0.000514544	9.89369e-33	-0.000739777	-1.82713e-07	0.000384373	-9.63373e-18	-0.00027644
1959.3	-0.000300665	-0.000415795	9.0268e-34	-0.000543822	-7.78556e-08	0.000385624	-2.62666e-17	-0.000393756
1959.94	-0.000323305	-0.000399127	7.90323e-35	-0.000389926	-1.33615e-07	0.000382351	-7.04709e-17	-0.000535235
1960.59	-0.000410056	-0.000457074	6.64004e-36	-0.000272701	-4.5347e-07	0.000374261	-1.86043e-16	-0.000694312
1961.23	-0.000560174	-0.000573019	5.35342e-37	-0.00018604	-1.53416e-06	0.000361362	-4.83295e-16	-0.000859519
1961.87	-0.000757967	-0.000722113	4.14179e-38	-0.000123836	-4.78991e-06	0.000343954	-1.2354e-15	-0.00101543
1962.51	-0.000968299	-0.000875665	3.07496e-39	-8.04956e-05	-1.37303e-05	0.000322592	-3.10743e-15	-0.00114481
1963.16	-0.00114955	-0.00100921	2.19072e-40	-5.12304e-05	-3.6123e-05	0.00029803	-7.69115e-15	-0.00123171
1963.8	-0.00127479	-0.00111288	1.49771e-41	-3.219e-05	-8.72227e-05	0.000271156	-1.87317e-14	-0.00126467
1964.44	-0.00134716	-0.00120084	9.82643e-43	-2.04706e-05	-0.000193293	0.000242917	-4.48912e-14	-0.00123918
1965.09	-0.00140386	-0.00131534	6.23294e-44	-1.40566e-05	-0.000393137	0.000214253	-1.05862e-13	-0.00115874
1965.73	-0.00151053	-0.00152049	6.8448e-45	-1.17372e-05	-0.000733859	0.000186032	-2.45651e-13	-0.00103402
1966.37	-0.00174743	-0.00188313	2.03421e-44	-1.30274e-05	-0.00125725	0.000159008	-5.60909e-13	-0.000880567
1967.01	-0.00218358	-0.00244286	1.2799e-43	-1.8107e-05	-0.00197685	0.000133783	-1.26027e-12	-0.000715629
1967.66	-0.00283707	-0.00318102	7.99135e-43	-2.77759e-05	-0.00285276	0.000110795	-2.78632e-12	-0.000555015
1968.3	-0.00363817	-0.00400423	4.90005e-42	-4.34097e-05	-0.00377831	9.03182e-05	-6.0617e-12	-0.000410784
1968.94	-0.00442028	-0.00475696	2.95037e-41	-6.68858e-05	-0.00459274	7.24695e-05	-1.29764e-11	-0.000290144
1969.59	-0.00496892	-0.0052661	1.74441e-40	-0.000100447	-0.00512374	5.72344e-05	-2.73346e-11	-0.000195571
1970.23	-0.0051168	-0.00540248	1.01278e-39	-0.000146474	-0.00524618	4.44918e-05	-5.66588e-11	-0.000125802
1970.87	-0.00483161	-0.00513094	5.77404e-39	-0.000207141	-0.00492993	3.40424e-05	-1.15563e-10	-7.72261e-05
1971.51	-0.00423033	-0.00452366	3.23251e-38	-0.000283976	-0.00425186	2.56377e-05	-2.31935e-10	-4.52408e-05
1972.16	-0.00350919	-0.00373	1.77703e-37	-0.000377353	-0.00336556	1.90044e-05	-4.58048e-10	-2.52923e-05
1972.8	-0.00284482	-0.00291973	9.59279e-37	-0.000486014	-0.002445	1.38658e-05	-8.90129e-10	-1.34939e-05
1973.44	-0.00233253	-0.00222797	5.085e-36	-0.000606705	-0.00163019	9.95753e-06	-1.70212e-09	-6.87037e-06
1974.09	-0.00198664	-0.00172498	2.64687e-35	-0.00073406	-0.000997566	7.03841e-06	-3.20278e-09	-3.3382e-06
1974.73	-0.00177507	-0.00141631	1.35292e-34	-0.000860816	-0.000560254	4.8968e-06	-5.93005e-09	-1.54788e-06
1975.37	-0.00165081	-0.00126388	6.79054e-34	-0.000978394	-0.000288782	3.35325e-06	-1.08041e-08	-6.84941e-07
1976.01	-0.00156585	-0.0012122	3.34683e-33	-0.00107781	-0.000136614	2.26014e-06	-1.93692e-08	-2.89242e-07
1976.66	-0.00147791	-0.00120864	1.61979e-32	-0.00115079	-5.93146e-05	1.49941e-06	-3.41692e-08	-1.16563e-07
1977.3	-0.00136071	-0.00121361	7.69801e-32	-0.00119089	-2.36357e-05	9.79081e-07	-5.93136e-08	-4.48282e-08
1977.94	-0.00121184	-0.00120258	3.59248e-31	-0.00119446	-8.64406e-06	6.29265e-07	-1.01314e-07	-1.64526e-08
1978.59	-0.00104626	-0.00116385	1.64629e-30	-0.00116118	-2.9014e-06	3.98074e-07	-1.70287e-07	-5.76246e-09
1979.23	-0.000882371	-0.00109501	7.40823e-30	-0.00109408	-8.93796e-07	2.47862e-07	-2.81638e-07	-1.92608e-09
1979.87	-0.000732488	-0.000999694	3.27354e-29	-0.000999134	-2.52703e-07	1.51904e-07	-4.58351e-07	-6.14371e-10
1980.51	-0.000604545	-0.000885056	1.42042e-28	-0.000884348	-6.55727e-08	9.16318e-08	-7.34009e-07	-1.87016e-10
1981.16	-0.000503007	-0.000759778	6.05217e-28	-0.00075866	-1.56162e-08	5.44049e-08	-1.15665e-06	-5.43276e-11
1981.8	-0.000429415	-0.00063257	2.53222e-27	-0.000630805	-3.41328e-09	3.1794e-08	-1.79348e-06	-1.50609e-11
1982.44	-0.000381072	-0.000511075	1.04037e-26	-0.000508356	-6.84711e-10	1.8288e-08	-2.73647e-06	-3.98452e-12
1983.08	-0.000352458	-0.000401167	4.1973e-26	-0.000397068	-1.26062e-10	1.03539e-08	-4.10848e-06	-1.00598e-12
1983.73	-0.000334496	-0.000306663	1.66283e-25	-0.000300599	-2.13011e-11	5.76975e-09	-6.06971e-06	-2.42381e-13
1984.37	-0.000319425	-0.000229384	6.46875e-25	-0.000220563	-3.3034e-12	3.16464e-09	-8.82371e-06	-5.57309e-14
1985.01	-0.000302587	-0.000169477	2.47109e-24	-0.000156857	-4.70177e-13	1.70847e-09	-1.26221e-05	-1.22289e-14
1985.66	-0.000285607	-0.000125884	9.26945e-24	-0.000108118	-6.1419e-14	9.07834e-10	-1.77668e-05	-2.56075e-15
1986.3	-0.00027203	-9.68381e-05	3.4144e-23	-7.22302e-05	-7.36352e-15	4.74811e-10	-2.46084e-05	-5.1173e-16
1986.94	-0.000263594	-8.03086e-05	1.23501e-22	-4.67695e-05	-8.1023e-16	2.44427e-10	-3.35393e-05	-9.75901e-17
1987.58	-0.000257846	-7.43317e-05	4.38654e-22	-2.93516e-05	-8.18225e-17	1.23849e-10	-4.49802e-05	-1.77608e-17
1988.23	-0.0002525	-7.72124e-05	1.52992e-21	-1.78536e-05	-7.58365e-18	6.17666e-11	-5.93589e-05	-3.08468e-18
1988.87	-0.000248017	-8.76064e-05	5.23977e-21	-1.05255e-05	-6.45096e-19	3.032e-11	-7.70809e-05	-5.11269e-19
1989.51	-0.000246938	-0.000104507	1.76218e-20	-6.01429e-06	-5.03631e-20	1.46494e-11	-9.84929e-05	-8.08688e-20
1990.16	-0.000249472	-0.00012717	5.8195e-20	-3.33082e-06	-3.60862e-21	6.96666e-12	-0.00012384	-1.22068e-20
1990.8	-0.000253026	-0.000155006	1.88719e-19	-1.78789e-06	-2.37307e-22	3.26096e-12	-0.000153218	-1.7584e-21
1991.44	-0.00025526	-0.000187465	6.00955e-19	-9.30159e-07	-1.43226e-23	1.50239e-12	-0.000186535	-2.41726e-22
1992.08	-0.000256599	-0.000223932	1.87916e-18	-4.69026e-07	-7.93364e-25	6.81293e-13	-0.000223463	-3.17118e-23
1992.73	-0.000261253	-0.000263648	5.77007e-18	-2.29225e-07	-4.03334e-26	3.04089e-13	-0.000263419	-3.97018e-24
1993.37	-0.000274593	-0.000305661	1.73978e-17	-1.0858e-07	-1.88191e-27	1.33593e-13	-0.000305553	-4.74341e-25
1994.01	-0.000299339	-0.000348807	5.15113e-17	-4.98499e-08	-8.05886e-29	5.77671e-14	-0.000348757	-5.40833e-26
1994.66	-0.000331595	-0.000391725	1.49764e-16	-2.21821e-08	-3.1673e-30	2.45863e-14	-0.000391703	-5.88474e-27
1995.3	-0.000364103	-0.000432912	4.2757e-16	-9.56675e-09	-1.14247e-31	1.02996e-14	-0.000432902	-6.11058e-28
1995.94	-0.000393741	-0.000470788	1.19868e-15	-3.999e-09	-3.7822e-33	4.24683e-15	-0.000470784	-6.05521e-29
1996.58	-0.000424004	-0.000503798	3.29985e-15	-1.62018e-09	-1.14917e-34	1.72355e-15	-0.000503796	-5.72622e-30
1997.23	-0.000459214	-0.000530509	8.92035e-15	-6.36207e-10	-3.20452e-36	6.88489e-16	-0.000530508	-5.16771e-31
1997.87	-0.000496628	-0.000549717	2.36791e-14	-2.42136e-10	-8.20133e-38	2.70699e-16	-0.000549717	-4.45061e-32
1998.51	-0.000529497	-0.000560537	6.17225e-14	-8.93189e-11	-1.9264e-39	1.04759e-16	-0.000560537	-3.65791e-33
1999.16	-0.000551375	-0.000562473	1.57986e-13	-3.19339e-11	-4.15288e-41	3.99035e-17	-0.000562473	-2.86905e-34
1999.8	-0.000559588	-0.000555464	3.97089e-13	-1.10659e-11	-8.21663e-43	1.49605e-17	-0.000555464	-2.14751e-35
2000.44	-0.000553874	-0.000539892	9.80062e-13	-3.71659e-12	-1.49203e-44	5.52073e-18	-0.000539892	-1.53399e-36
2001.08	-0.000535301	-0.000516559	2.37528e-12	-1.20984e-12	-2.48659e-46	2.00522e-18	-0.000516559	-1.04569e-37
2001.73	-0.000508724	-0.000486634	5.65291e-12	-3.81711e-13	-3.8034e-48	7.16875e-19	-0.000486634	-6.80259e-39
2002.37	-0.000481573	-0.000451574	1.32107e-11	-1.16726e-13	-5.33926e-50	2.52255e-19	-0.000451574	-4.22315e-40
2003.01	-0.000457624	-0.000413031	3.03161e-11	-3.45957e-14	-6.87908e-52	8.73679e-20	-0.000413031	-2.50202e-41
2003.65	-0.000431507	-0.000372747	6.83153e-11	-9.93808e-15	-8.13431e-54	2.97837e-20	-0.000372747	-1.41461e-42
2004.3	-0.000395464	-0.000332459	1.51167e-10	-2.76699e-15	-8.82779e-56	9.99358e-21	-0.000332459	-7.63265e-44
2004.94	-0.000348558	-0.000293802	3.28468e-10	-7.46685e-16	-8.79275e-58	3.30049e-21	-0.000293802	-3.93011e-45
2005.58	-0.000300354	-0.00025824	7.0085e-10	-1.95295e-16	-8.03782e-60	1.07288e-21	-0.00025824	-1.93119e-46
2006.23	-0.000261865	-0.000227002	1.46843e-09	-4.95074e-17	-6.74362e-62	3.43273e-22	-0.000227004	-9.05603e-48
2006.87	-0.000237107	-0.000201044	3.02117e-09	-1.21639e-17	-5.19264e-64	1.08104e-22	-0.000201047	-4.05268e-49
2007.51	-0.00022362	-0.000181021	6.1037e-09	-2.89668e-18	-3.66966e-66	3.3509e-23	-0.000181027	-1.73076e-50
2008.15	-0.000219446	-0.000167274	1.2109e-08	-6.68578e-19	-2.38313e-68	1.02234e-23	-0.000167286	-7.05383e-52
2008.8	-0.000224927	-0.000159831	2.35894e-08	-1.49565e-19	-7.65482e-70	3.07005e-24	-0.000159855	-2.74349e-53
2009.44	-0.000240026	-0.000158412	4.51256e-08	-3.24287e-20	-1.26261e-68	9.0743e-25	-0.000158457	-1.0183e-54
2010.08	-0.000259765	-0.000162444	8.47665e-08	-6.81483e-21	-2.48032e-67	2.64007e-25	-0.000162529	-3.60691e-56
2010.73	-0.000276911	-0.000171088	1.56358e-07	-1.38805e-21	-4.72982e-66	7.56307e-26	-0.000171244	-1.21924e-57
2011.37	-0.000288066	-0.000183269	2.83213e-07	-2.74018e-22	-8.75488e-65	2.13958e-26	-0.000183552	-3.9331e-59
2012.01	-0.000296075	-0.000197725	5.03735e-07	-5.24298e-23	-1.57299e-63	6.1283e-27	-0.000198229	-1.2108e-60
2012.65	-0.000305663	-0.000213062	8.79804e-07	-9.72302e-24	-2.74328e-62	2.13673e-27	-0.000213942	-3.55713e-62
2013.3	-0.000316107	-0.000227816	1.50892e-06	-1.74763e-24	-4.64391e-61	1.67998e-27	-0.000229325	-9.97286e-64
2013.94	-0.000321566	-0.000240521	2.54121e-06	-3.04454e-25	-7.63075e-60	3.06438e-27	-0.000243062	-2.66828e-65
2014.58	-0.000315476	-0.000249772	4.20255e-06	-5.14065e-26	-1.21708e-58	6.96325e-27	-0.000253975	-6.81294e-67
2015.23	-0.00029417	-0.000254275	6.82463e-06	-8.41278e-27	-1.88427e-57	1.61959e-26	-0.000261099	-1.66008e-68
2015.87	-0.000258618	-0.00025287	1.08828e-05	-1.3344e-27	-2.83161e-56	3.7554e-26	-0.000263753	-3.86025e-70
2016.51	-0.000213171	-0.000244536	1.70412e-05	-2.05142e-28	-4.13043e-55	8.65772e-26	-0.000261578	-8.5663e-72
2017.15	-0.000164907	-0.000228351	2.62032e-05	-3.05668e-29	-5.84824e-54	1.98479e-25	-0.000254554	-1.81411e-73
2017.8	-0.00011875	-0.000203423	3.95643e-05	-4.41437e-30	-8.03758e-53	4.52767e-25	-0.000242987	-3.66626e-75
2018.44	-7.48873e-05	-0.000168804	5.8661e-05	-6.17892e-31	-1.07225e-51	1.02873e-24	-0.000227465	-7.07093e-77
2019.08	-3.04052e-05	-0.000123384	8.54064e-05	-8.38264e-32	-1.38846e-50	2.33112e-24	-0.00020879	-1.30143e-78
2019.73	1.70729e-05	-6.57984e-05	0.000122103	-1.10223e-32	-1.74519e-49	5.27734e-24	-0.000187902	-2.2859e-80
2020.37	6.97674e-05	5.63301e-06	0.000171419	-1.40472e-33	-2.12921e-48	1.19623e-23	-0.000165786	-3.83163e-82
2021.01	0.000133177	9.29137e-05	0.000236313	-1.73513e-34	-2.52154e-47	2.72229e-23	-0.000143399	-6.12919e-84
2021.65	0.000215705	0.000198303	0.000319898	-2.07729e-35	-2.89856e-46	6.23916e-23	-0.000121595	-9.3565e-86
2022.3	0.000324095	0.000324161	0.000425237	-2.4104e-36	-3.23421e-45	1.44482e-22	-0.000101076	-1.36306e-87
2022.94	0.00045983	0.000472705	0.000555068	-2.71084e-37	-3.50287e-44	3.39108e-22	-8.23637e-05	-1.895e-89
2023.58	0.000621464	0.000645678	0.000711471	-2.9549e-38	-3.68255e-43	8.08607e-22	-6.5793e-05	-2.51417e-91
2024.23	0.000809026	0.000843977	0.000895497	-3.12181e-39	-3.75787e-42	1.96129e-21	-5.152e-05	-3.18326e-93
2024.87	0.00102494	0.00106725	0.00110679	-3.19665e-40	-3.72225e-41	4.83766e-21	-3.95479e-05	-3.84628e-95
2025.51	0.00127113	0.00131351	0.00134327	-3.17255e-41	-3.57881e-40	1.21132e-20	-2.97592e-05	-4.43507e-97
2026.15	0.00154712	0.00157893	0.00160088	-3.05173e-42	-3.33996e-39	3.06994e-20	-2.19518e-05	-4.88036e-99
2026.8	0.00184863	0.0018576	0.00187348	-2.84516e-43	-3.02561e-38	7.84619e-20	-1.58733e-05	-5.12502e-101
2027.44	0.00216912	0.00214169	0.00215295	-2.57095e-44	-2.66044e-37	2.01448e-19	-1.12515e-05	-5.13607e-103
2028.08	0.0024998	0.00242167	0.00242948	-2.25167e-45	-2.27072e-36	5.1766e-19	-7.81821e-06	-4.91199e-105
2028.72	0.002827	0.00268677	0.0026921	-1.91135e-46	-1.88124e-35	1.32706e-18	-5.32539e-06	-4.48307e-107
2029.37	0.00313212	0.00292574	0.00292929	-1.57253e-47	-1.51284e-34	3.38464e-18	-3.55585e-06	-3.90467e-109
2030.01	0.00339484	0.00312758	0.0031299	-1.25396e-48	-1.1809e-33	8.56962e-18	-2.32747e-06	-3.24553e-111
2030.65	0.00359835	0.00328244	0.00328394	-9.69153e-50	-8.94748e-33	2.15025e-17	-1.49339e-06	-2.57442e-113
2031.3	0.00373197	0.00338247	0.00338341	-7.25982e-51	-6.58049e-32	5.3397e-17	-9.39317e-07	-1.94878e-115
2031.94	0.00378673	0.00342244	0.00342302	-5.27088e-52	-4.6977e-31	1.31102e-16	-5.79161e-07	-1.4078e-117
2032.58	0.00375554	0.00340028	0.00340063	-3.70907e-53	-3.25523e-30	3.18005e-16	-3.50053e-07	-9.70526e-120
2033.22	0.00363666	0.00331726	0.00331747	-2.52972e-54	-2.18952e-29	7.61633e-16	-2.07404e-07	-6.38508e-122
2033.87	0.00343684	0.00317784	0.00317796	-1.67226e-55	-1.4295e-28	1.80035e-15	-1.20462e-07	-4.00883e-124
2034.51	0.00317272	0.00298935	0.00298942	-1.07142e-56	-9.05916e-28	4.19883e-15	-6.85853e-08	-2.40193e-126
2035.15	0.00286552	0.0027613	0.00276134	-6.65333e-58	-5.57265e-27	9.65955e-15	-3.8279e-08	-1.37339e-128
2035.8	0.00253839	0.00250464	0.00250466	-4.00446e-59	-3.32741e-26	2.19161e-14	-2.0943e-08	-7.49409e-131
2036.44	0.00221369	0.00223086	0.00223087	-2.336e-60	-1.9285e-25	4.90328e-14	-1.12322e-08	-3.90244e-133
2037.08	0.00190778	0.00195116	0.00195117	-1.32077e-61	-1.08493e-24	1.08164e-13	-5.90526e-09	-1.9393e-135
2037.72	0.00162612	0.00167576	0.00167576	-7.23776e-63	-5.92452e-24	2.35246e-13	-3.04342e-09	-9.19698e-138
2038.37	0.00136663	0.00141326	0.00141327	-3.84421e-64	-3.14032e-23	5.04396e-13	-1.53757e-09	-4.16234e-140
2039.01	0.00112808	0.00117039	0.00117039	-1.97894e-65	-1.61572e-22	1.06614e-12	-7.61472e-10	-1.79771e-142
2039.65	0.000915158	0.000951776	0.000951777	-9.87381e-67	-8.0691e-22	2.22145e-12	-3.69677e-10	-7.40962e-145
2040.3	0.000732278	0.000760036	0.000760036	-4.77486e-68	-3.9116e-21	4.56273e-12	-1.7593e-10	-2.91449e-147
2040.94	0.000577197	0.000595977	0.000595977	-2.23801e-69	-1.84057e-20	9.23781e-12	-8.2074e-11	-1.09401e-149
2041.58	0.000444498	0.000458902	0.000458902	-1.01668e-70	-8.40662e-20	1.84358e-11	-3.75336e-11	-3.91896e-152
2042.22	0.000331812	0.000346981	0.000346981	-4.47647e-72	-3.727e-19	3.62661e-11	-1.68261e-11	-1.33971e-154
2042.87	0.000238693	0.000257625	0.000257625	-1.91033e-73	-1.60386e-18	7.03199e-11	-7.39425e-12	-4.37064e-157
2043.51	0.000162949	0.000187831	0.00018783	-7.90147e-75	-6.69951e-18	1.34398e-10	-3.18532e-12	-1.36072e-159
2044.15	0.000102457	0.000134475	0.000134474	-3.1676e-76	-2.71637e-17	2.53185e-10	-1.34512e-12	-4.04284e-162
2044.8	5.64429e-05	9.45389e-05	9.45384e-05	-1.23077e-77	-1.06907e-16	4.70127e-10	-5.56826e-13	-1.14629e-164
2045.44	2.30731e-05	6.52648e-05	6.52639e-05	-4.635e-79	-4.08403e-16	8.60443e-10	-2.2596e-13	-3.10166e-167
2046.08	-1.22091e-06	4.42435e-05	4.42419e-05	-1.69179e-80	-1.51441e-15	1.55223e-09	-8.98915e-14	-8.00912e-170
2046.72	-1.88234e-05	2.94531e-05	2.94504e-05	-5.98503e-82	-5.45089e-15	2.76005e-09	-3.50674e-14	-1.97364e-172
2047.37	-2.75962e-05	1.92555e-05	1.92507e-05	-2.05216e-83	-1.90441e-14	4.8373e-09	-1.34354e-14	-4.64132e-175
2048.01	-2.58254e-05	1.23653e-05	1.23569e-05	-6.81995e-85	-6.45837e-14	8.35629e-09	-5.09797e-15	-1.04161e-177
2048.65	-1.68192e-05	7.80455e-06	7.79032e-06	-2.19672e-86	-2.12596e-13	1.42281e-08	-2.00263e-15	-2.23082e-180
2049.29	-3.72182e-06	4.85175e-06	4.82787e-06	-6.85795e-88	-6.79291e-13	2.38785e-08	-9.84775e-16	-4.55946e-183
2049.94	1.68941e-05	2.99387e-06	2.95438e-06	-2.07509e-89	-2.10682e-12	3.94993e-08	-8.77435e-16	-8.89312e-186
2050.58	5.3716e-05	1.88932e-06	1.82493e-06	-6.08562e-91	-6.3426e-12	6.44012e-08	-1.35868e-15	-1.65534e-188
2051.22	0.000112659	1.35158e-06	1.24811e-06	-1.7298e-92	-1.85343e-11	1.03495e-07	-2.54291e-15	-2.94042e-191
2051.87	0.000190901	1.37058e-06	1.2067e-06	-4.76555e-94	-5.25721e-11	1.63935e-07	-4.91719e-15	-4.98454e-194
2052.51	0.000279909	2.2001e-06	1.9443e-06	-1.27249e-95	-1.44745e-10	2.55943e-07	-9.49351e-15	-8.06366e-197
2053.15	0.000368695	4.55606e-06	4.16259e-06	-3.29321e-97	-3.86832e-10	3.93856e-07	-1.81876e-14	-1.24489e-199
2053.79	0.000446358	9.9837e-06	9.38732e-06	-8.26057e-99	-1.00348e-09	5.97385e-07	-3.45382e-14	-1.83409e-202
2054.44	0.000503413	2.14464e-05	2.05558e-05	-2.00828e-100	-2.52677e-09	8.93086e-07	-6.50011e-14	-2.57871e-205
2055.08	0.000534907	4.41385e-05	4.28287e-05	-4.7322e-102	-6.17578e-09	1.316e-06	-1.21234e-13	-3.46e-208
2055.72	0.000545748	8.64032e-05	8.45066e-05	-1.08075e-103	-1.46517e-08	1.91134e-06	-2.24084e-13	-4.43038e-211
2056.37	0.000552143	0.000160434	0.000157732	-2.39229e-105	-3.37406e-08	2.73617e-06	-4.10466e-13	-5.41374e-214
2057.01	0.000579809	0.000282207	0.000278421	-5.13248e-107	-7.542e-08	3.86075e-06	-7.45117e-13	-6.31313e-217
2057.65	0.000658453	0.000469947	0.000464741	-1.06724e-108	-1.6364e-07	5.36936e-06	-1.34046e-12	-7.02562e-220
2058.29	0.000815844	0.00074058	0.000733564	-2.15092e-110	-3.44638e-07	7.36032e-06	-2.3898e-12	-7.46132e-223
2058.94	0.00107386	0.00110416	0.00109492	-4.20156e-112	-7.04541e-07	9.94476e-06	-4.22233e-12	-7.56204e-226
2059.58	0.00144228	0.00155724	0.00154539	-7.95465e-114	-1.39804e-06	1.32439e-05	-7.39304e-12	-7.31397e-229
2060.22	0.00191112	0.00207727	0.00206258	-1.45967e-115	-2.69277e-06	1.73844e-05	-1.28285e-11	-6.75086e-232
2060.87	0.00244279	0.0026206	0.00260314	-2.59606e-117	-5.03443e-06	2.24922e-05	-2.20601e-11	-5.94644e-235
2061.51	0.00297115	0.00312626	0.00310671	-4.47506e-119	-9.13631e-06	2.86832e-05	-3.75942e-11	-4.99857e-238
2062.15	0.00341414	0.00352601	0.00350605	-7.47665e-121	-1.60939e-05	3.60537e-05	-6.34914e-11	-4.00984e-241
2062.79	0.00369319	0.00375869	0.00374154	-1.21071e-122	-2.75182e-05	4.46685e-05	-1.06265e-10	-3.06972e-244
2063.44	0.0037516	0.00378458	0.0037757	-1.90019e-124	-4.56718e-05	5.45483e-05	-1.76257e-10	-2.24266e-247
2064.08	0.0035707	0.00359505	0.00360297	-2.89054e-126	-7.35778e-05	6.56588e-05	-2.89723e-10	-1.56357e-250
2064.72	0.0031774	0.00321399	0.00325115	-4.26172e-128	-0.000115057	7.79002e-05	-4.71955e-10	-1.04032e-253
2065.37	0.00263559	0.0026906	0.00277415	-6.08997e-130	-0.000174644	9.11006e-05	-7.61902e-10	-6.60548e-257
2066.01	0.00202267	0.00208609	0.00223839	-8.43472e-132	-0.000257313	0.000105013	-1.21893e-09	-4.00253e-260
2066.65	0.0014035	0.0014592	0.00170788	-1.13227e-133	-0.000367997	0.00011932	-1.93259e-09	-2.3145e-263
2067.29	0.000817503	0.000855017	0.00123224	-1.47317e-135	-0.000510857	0.000133639	-3.03654e-09	-1.27723e-266
2067.94	0.000280833	0.000299857	0.000840711	-1.85773e-137	-0.00068839	0.00014754	-4.72826e-09	-6.72628e-270
2068.58	-0.000205232	-0.00019749	0.000542392	-2.27057e-139	-0.000900443	0.000160568	-7.29633e-09	-3.38043e-273
2069.22	-0.000648507	-0.000640198	0.000330899	-2.68976e-141	-0.00114335	0.000172261	-1.1158e-08	-1.62129e-276
2069.86	-0.00105968	-0.0010363	0.000190894	-3.08827e-143	-0.00140937	0.000182186	-1.69103e-08	-7.42061e-280
2070.51	-0.00144563	-0.00139262	0.000104136	-3.4367e-145	-0.00168669	0.00018996	-2.53979e-08	-3.24124e-283
2071.15	-0.00180474	-0.00171117	5.37192e-05	-3.70674e-147	-0.00196013	0.00019528	-3.78028e-08	-1.35106e-286
2071.79	-0.00212572	-0.00198844	2.62042e-05	-3.87497e-149	-0.00221253	0.000197941	-5.57611e-08	-5.37439e-290
2072.44	-0.00239268	-0.00221701	1.20872e-05	-3.92616e-151	-0.00242688	0.000197856	-8.15115e-08	-2.04021e-293
2073.08	-0.00259308	-0.00238849	5.27227e-06	-3.8556e-153	-0.0025887	0.000195055	-1.18083e-07	-7.39116e-297
2073.72	-0.00272314	-0.00249679	2.17462e-06	-3.66979e-155	-0.00268849	0.000189691	-1.69526e-07	-2.5553e-300
2074.36	-0.00278718	-0.00254091	8.48174e-07	-3.38543e-157	-0.00272355	0.000182025	-2.41195e-07	-8.43069e-304
2075.01	-0.00279061	-0.00252651	3.12825e-07	-3.027e-159	-0.00269889	0.000172409	-3.40078e-07	-2.65446e-307
2075.65	-0.00273648	-0.00246596	1.09102e-07	-2.62322e-161	-0.00262686	0.000161262	-4.75194e-07	--
2076.29	-0.0026296	-0.00237696	3.59813e-08	-2.20334e-163	-0.00252538	0.000149046	-6.58028e-07	--
2076.94	-0.00248456	-0.00227965	1.12212e-08	-1.79371e-165	-0.00241499	0.000136231	-9.03021e-07	--
2077.58	-0.00233051	-0.00219313	3.30913e-09	-1.4153e-167	-0.00231519	0.000123275	-1.2281e-06	--
2078.22	-0.00220657	-0.00213175	9.22793e-10	-1.08235e-169	-0.00224069	0.000110594	-1.65519e-06	0
2078.86	-0.00215074	-0.00210223	2.43338e-10	-8.02256e-172	-0.00219857	9.85487e-05	-2.21078e-06	0
2079.51	-0.00218422	-0.00210221	6.06778e-11	-5.76345e-174	-0.00218671	8.74264e-05	-2.92632e-06	0
2080.15	-0.00229778	-0.0021207	1.43075e-11	-4.01306e-176	-0.0021943	7.74381e-05	-3.83866e-06	0
2080.79	-0.00244906	-0.00214043	3.19018e-12	-2.70828e-178	-0.00220416	6.87158e-05	-4.99021e-06	0
2081.44	-0.00257804	-0.00214165	6.72637e-13	-1.77148e-180	-0.00219654	6.13175e-05	-6.42893e-06	0
2082.08	-0.00262988	-0.00210647	1.3411e-13	-1.12306e-182	-0.0021535	5.52349e-05	-8.20804e-06	0
2082.72	-0.00257323	-0.00202277	2.52846e-14	-6.90073e-185	-0.00206279	5.04052e-05	-1.03853e-05	0
2083.36	-0.00240456	-0.00188667	4.50781e-15	-4.10971e-187	-0.00192037	4.67227e-05	-1.30222e-05	0
2084.01	-0.00214539	-0.00170306	7.59959e-16	-2.3722e-189	-0.00173093	4.40522e-05	-1.61818e-05	0
2084.65	-0.00183434	-0.00148424	1.21152e-16	-1.32714e-191	-0.00150655	4.22406e-05	-1.99274e-05	0
2085.29	-0.00151508	-0.00124706	1.82635e-17	-7.19625e-194	-0.00126387	4.11273e-05	-2.43195e-05	0
2085.94	-0.00122008	-0.00100955	2.60348e-18	-3.78199e-196	-0.00102069	4.05534e-05	-2.94131e-05	0
2086.58	-0.000964534	-0.000787743	3.50945e-19	-1.92645e-198	-0.000792858	4.03682e-05	-3.52539e-05	0
2087.22	-0.000750076	-0.000593489	4.4734e-20	-9.5109e-201	-0.000592048	4.0434e-05	-4.1875e-05	0
2087.86	-0.000573572	-0.000433489	5.39203e-21	-4.55102e-203	-0.000424826	4.06295e-05	-4.92928e-05	0
2088.51	-0.000433045	-0.0003095	6.14585e-22	-2.11067e-205	-0.000292848	4.08513e-05	-5.75033e-05	0
2089.15	-0.00032781	-0.000219361	6.62408e-23	-9.48761e-208	-0.000193897	4.10144e-05	-6.64787e-05	0
2089.79	-0.000254575	-0.000158407	6.75126e-24	-4.1335e-210	-0.000123295	4.10519e-05	-7.61646e-05	0
2090.43	-0.000206306	-0.000120851	6.50667e-25	-1.74543e-212	-7.52874e-05	4.09139e-05	-8.64779e-05	0
2091.08	-0.000173333	-0.000100884	5.92991e-26	-7.14353e-215	-4.41448e-05	4.05663e-05	-9.73056e-05	0
2091.72	-0.000148874	-9.33704e-05	5.11036e-27	-2.83366e-217	-2.4854e-05	3.99889e-05	-0.000108505	0
2092.36	-0.000131142	-9.41687e-05	4.16457e-28	-1.08945e-219	-1.34357e-05	3.91742e-05	-0.000119907	0
2093.01	-0.000120845	-0.000100165	3.20926e-29	-4.05966e-222	-6.97365e-06	3.81252e-05	-0.000131317	0
2093.65	-0.000117983	-0.000109142	2.33858e-30	-1.46621e-224	-3.47529e-06	3.68536e-05	-0.00014252	0
2094.29	-0.00011854	-0.000119574	1.61145e-31	-5.1325e-227	-1.66282e-06	3.53787e-05	-0.00015329	0
2094.93	-0.000116637	-0.000130431	1.05001e-32	-1.74135e-229	-7.63875e-07	3.37253e-05	-0.000163392	0
2095.58	-0.000108087	-0.00014101	6.46976e-34	-5.7262e-232	-3.36912e-07	3.1922e-05	-0.000172595	0
2096.22	-9.3174e-05	-0.000150822	3.76961e-35	-1.82504e-234	-1.42668e-07	3.00005e-05	-0.000180679	0
2096.86	-7.7619e-05	-0.000159507	2.07692e-36	-5.63771e-237	-5.80033e-08	2.79936e-05	-0.000187443	0
2097.51	-6.86793e-05	-0.000166801	1.08208e-37	-1.68794e-239	-2.26408e-08	2.59341e-05	-0.000192713	0
2098.15	-7.05644e-05	-0.000172505	5.33104e-39	-4.8982e-242	-8.48484e-09	2.3854e-05	-0.000196351	0
2098.79	-8.11956e-05	-0.00017648	2.48359e-40	-1.37765e-244	-3.05286e-09	2.17833e-05	-0.00019826	0
2099.43	-9.3383e-05	-0.000178641	1.09413e-41	-3.7555e-247	-1.05459e-09	1.97497e-05	-0.000198389	0
2100.08	-9.78955e-05	-0.000178959	4.55803e-43	-9.92248e-250	-3.49759e-10	1.77774e-05	-0.000196736	0
2100.72	-9.12759e-05	-0.000177456	1.7957e-44	-2.54096e-252	-1.11369e-10	1.58871e-05	-0.000193343	0
2101.36	-7.93059e-05	-0.000174206	6.69166e-46	-6.30665e-255	-3.40466e-11	1.40959e-05	-0.000188302	0
2102.01	-7.00023e-05	-0.000169328	2.36083e-47	-1.51714e-257	-9.99289e-12	1.24167e-05	-0.000181745	0
2102.65	-6.44976e-05	-0.000162981	7.9153e-49	-3.53732e-260	-2.81591e-12	1.08591e-05	-0.00017384	0
2103.29	-5.56169e-05	-0.000155357	2.56328e-50	-7.99374e-263	-7.61829e-13	9.42858e-06	-0.000164786	0
2103.93	-3.86813e-05	-0.000146672	8.56971e-52	-1.75085e-265	-1.97882e-13	8.12772e-06	-0.0001548	0
2104.58	-1.77065e-05	-0.000137158	3.63662e-53	-3.71683e-268	-4.93473e-14	6.956e-06	-0.000144114	0
2105.22	-4.1147e-07	-0.000127054	2.53833e-54	-7.64753e-271	-1.18149e-14	5.91044e-06	-0.000132965	0
2105.86	9.70957e-06	-0.000116597	2.6169e-55	-1.52509e-273	-2.71587e-15	4.98595e-06	-0.000121583	0
2106.51	1.53537e-05	-0.000106017	3.06861e-56	-2.94776e-276	-5.99374e-16	4.17586e-06	-0.000110192	0
2107.15	2.04101e-05	-9.55306e-05	3.65904e-57	-5.52221e-279	-1.26998e-16	3.47225e-06	-9.90029e-05	0
2107.79	2.65031e-05	-8.53405e-05	4.31508e-58	-1.00267e-281	-2.58347e-17	2.86646e-06	-8.82069e-05	0
2108.43	3.25895e-05	-7.56284e-05	5.00381e-59	-1.76453e-284	-5.04571e-18	2.34936e-06	-7.79777e-05	0
2109.08	3.6829e-05	-6.65533e-05	5.69924e-60	-3.00972e-287	-9.46131e-19	1.91171e-06	-6.8465e-05	0
2109.72	3.82606e-05	-5.82441e-05	6.37452e-61	-4.9756e-290	-1.7033e-19	1.54441e-06	-5.97885e-05	0
2110.36	3.87542e-05	-5.07898e-05	7.00128e-62	-7.9724e-293	-2.94402e-20	1.23872e-06	-5.20285e-05	0
2111.01	4.03962e-05	-4.42274e-05	7.55099e-63	-1.23811e-295	-4.88542e-21	9.86392e-07	-4.52138e-05	0
2111.65	4.41699e-05	-3.85329e-05	7.99698e-64	-1.86359e-298	-7.7835e-22	7.79823e-07	-3.93127e-05	0
2112.29	4.79445e-05	-3.36196e-05	8.31656e-65	-2.71875e-301	-1.19058e-22	6.12085e-07	-3.42317e-05	0
2112.93	4.86503e-05	-2.93503e-05	8.49292e-66	-3.84424e-304	-1.74847e-23	4.76975e-07	-2.98273e-05	0
2113.58	4.63321e-05	-2.55635e-05	8.5166e-67	-5.26838e-307	-2.46529e-24	3.69019e-07	-2.59325e-05	0
2114.22	4.57061e-05	-2.21071e-05	8.38632e-68	--	-3.3373e-25	2.83446e-07	-2.23906e-05	0
2114.86	5.07285e-05	-1.88718e-05	8.10908e-69	--	-4.33748e-26	2.16152e-07	-1.9088e-05	0
2115.5	5.95218e-05	-1.58096e-05	7.6996e-70	--	-5.41252e-27	1.63651e-07	-1.59732e-05	0
2116.15	6.57232e-05	-1.29331e-05	7.17893e-71	--	-6.48459e-28	1.23012e-07	-1.30561e-05	0
2116.79	6.56968e-05	-1.02964e-05	6.57276e-72	--	-7.45918e-29	9.18e-08	-1.03882e-05	0
2117.43	6.27357e-05	-7.96563e-06	5.90923e-73	0	-8.23817e-30	6.80154e-08	-8.03364e-06	0
2118.08	6.2115e-05	-5.99172e-06	5.21687e-74	0	-8.73591e-31	5.00312e-08	-6.04175e-06	0
2118.72	6.63083e-05	-4.39323e-06	4.52256e-75	0	-8.89476e-32	3.65379e-08	-4.42977e-06	0
2119.36	7.33263e-05	-3.15346e-06	3.84995e-76	0	-8.69606e-33	2.64919e-08	-3.17995e-06	0
